# Supplementary material for: Identification of functional pathways and molecular signatures in neuroendocrine neoplasms by multi-omics analysis
Source: J Transl Med. 2022 Jul 6;20:306. doi: 10.1186/s12967-022-03511-7 (PMC9258165; doi:10.1186/s12967-022-03511-7)
Supplement: Supplementary file 1 — Additional file 1: Table S1. Sample information. [file 12967_2022_3511_MOESM1_ESM.xlsx]

## Sheet: Foglio1
Table S1: Sample information
Sample Numeric ID	Sample Code	Tissue/RNA	FFPE/Frozen	Gender	Tumor primary site	Age	Genetic Syndrome	WHO Grade	Ki67 %	CgA (%)	Syn (%)	Calcitonin (%)	Metastases	Sites of Metastases	Status	Type of Analysis
1	I-NEC_1	Tissue	FFPE	M	Intestine	76	no	G3	0.7	0.65	0.8		YES	hepatic	DECEASED	TSO500, RNA-Seq, smallRNA-Seq, aCGH
2	I-NEC_10	Tissue	FFPE	F	Intestine	86	no	G3	0.9	0.45	0.7		YES	perivisceral lymph nodes, hepatic	ND	TSO500, RNA-Seq, smallRNA-Seq
3	I-NEC_2	Tissue	FFPE	M	Intestine	66	no	G3	0.7	0	0.5		YES	lymph nodes	ALIVE	TSO500, RNA-Seq, smallRNA-Seq, aCGH
4	I-NET_3	Tissue	FFPE	F	Intestine	56	no	G2	0.15	0.61	0.9		NO	no	ALIVE	TSO500, RNA-Seq, smallRNA-Seq, aCGH
5	I-NET_4	Tissue	FFPE	M	Intestine	73	no	G1	0.01	0.8	0.8		YES	lymph nodes, hepatic	DECEASED	TSO500, RNA-Seq, smallRNA-Seq
6	I-NET_5	Tissue	FFPE	F	Intestine	48	no	G1	0.01	0.9	0.8		YES	hepatic	ALIVE	RNA-Seq, smallRNA-Seq, aCGH
7	I-NET_6	Tissue	FFPE	M	Intestine	68	no	G2	0.07	0.8	0.35		YES	lymph nodes	ALIVE	TSO500, RNA-Seq, smallRNA-Seq, aCGH
8	I-NET_7	Tissue	FFPE	F	Intestine	50	no	G2	0.07	0.75	0.95		YES	hepatic	DECEASED	TSO500, RNA-Seq, aCGH
9	I-NET_8	Tissue	FFPE	M	Intestine	65	no	G1	<2%	0.85	0.75		YES	lymph nodes	ALIVE	TSO500, RNA-Seq, smallRNA-Seq, aCGH
10	I-NET_9	Tissue	FFPE	M	Intestine	50	no	G1	0.01	0.7	0.75		YES	lymph nodes, hepatic	ALIVE	TSO500, RNA-Seq, smallRNA-Seq, aCGH
11	lung-NET_1	Tissue	FFPE	F	Lung	70	no	G2	0.05	0.5	0.8		NO	no	ALIVE	TSO500, RNA-Seq, smallRNA-Seq
12	MET_1	Tissue	FFPE	M	Intestine	47	no	G1	0.01	0.7	0.85		YES	hepatic	ALIVE	TSO500, RNA-Seq, smallRNA-Seq
13	MET_2	Tissue	FFPE	F	Intestine	78	no	G3	0.5	0.85	0.65		YES	lymph nodes	DECEASED	TSO500, RNA-Seq, smallRNA-Seq
14	MET_3	Tissue	FFPE	M	Pancreas	75	no	G3		0.6	0.65		YES	hepatic	ALIVE	TSO500, RNA-Seq, smallRNA-Seq, aCGH
15	MET_4	Tissue	FFPE	M	Lung	73	no	G3	0.4	0.25	0.65		YES	lymph nodes, adrenal	ALIVE	TSO500, RNA-Seq, smallRNA-Seq
16	MET_5	Tissue	FFPE	M	Lung	61	no	G3	0.7	0.45	0.65		YES	lymph nodes	ALIVE	TSO500, RNA-Seq, aCGH
17	MTC_1	Tissue	Frozen	F	Thyroid	42	men2			0.6		0.7	NO		ALIVE	TSO500, RNA-Seq, smallRNA-Seq
18	MTC_10	Tissue	Frozen	F	Thyroid	65	no			0.3		0.2	NO		ALIVE	TSO500, RNA-Seq, smallRNA-Seq, aCGH
19	MTC_11	Tissue	Frozen	M	Thyroid	45	no			0.4		0.7	NO		ALIVE	TSO500, RNA-Seq, smallRNA-Seq, aCGH
20	MTC_12	Tissue	Frozen	M	Thyroid	65	no						NO		ALIVE	TSO500, RNA-Seq, smallRNA-Seq
21	MTC_13	Tissue	Frozen	F	Thyroid	57	no						NO		ALIVE	TSO500, smallRNA-Seq, aCGH
22	MTC_14	Tissue	Frozen	F	Thyroid	66	no			0.75		0.6	NO		ALIVE	TSO500, RNA-Seq
23	MTC_15	Tissue	Frozen	F	Thyroid	68	no			0.5		0.5	NO		ALIVE	TSO500, RNA-Seq, smallRNA-Seq
24	MTC_16	Tissue	Frozen	F	Thyroid	73	no						NO		ALIVE	TSO500, smallRNA-Seq
25	MTC_17	Tissue	Frozen	F	Thyroid	50	no			0.7		0.6	NO		ALIVE	TSO500, RNA-Seq, smallRNA-Seq, aCGH
26	MTC_18	RNA	Frozen	F	Thyroid	14	ND						NO		ALIVE	RNA-Seq, smallRNA-Seq
27	MTC_19	RNA	Frozen	M	Thyroid	33	ND						NO		ALIVE	RNA-Seq, smallRNA-Seq
28	MTC_2	Tissue	Frozen	M	Thyroid	64	no						NO		ALIVE	TSO500, smallRNA-Seq, aCGH
29	MTC_20	RNA	Frozen	M	Thyroid	70	ND						NO		DECEASED	RNA-Seq, smallRNA-Seq
30	MTC_21	RNA	Frozen	M	Thyroid	69	ND						NO		Progression	RNA-Seq, smallRNA-Seq
31	MTC_22	RNA	Frozen	F	Thyroid	58	ND						NO		ALIVE	RNA-Seq, smallRNA-Seq
32	MTC_23	RNA	Frozen	F	Thyroid	78.5233	no						NO		ALIVE	RNA-Seq, smallRNA-Seq
33	MTC_24	RNA	Frozen	F	Thyroid	48.589	no						NO		ALIVE	RNA-Seq, smallRNA-Seq
34	MTC_25	RNA	Frozen	F	Thyroid	78.7205	no						NO		ALIVE	RNA-Seq, smallRNA-Seq
35	MTC_26	RNA	Frozen	F	Thyroid	41.1644	no						NO		ALIVE	RNA-Seq, smallRNA-Seq
36	MTC_27	RNA	Frozen	F	Thyroid	69.0438	no						NO		ALIVE	RNA-Seq, smallRNA-Seq
37	MTC_28	RNA	Frozen	M	Thyroid	66.6137	no						NO		ALIVE	RNA-Seq, smallRNA-Seq
38	MTC_29	RNA	Frozen	F	Thyroid	66.789	no						NO		ALIVE	RNA-Seq, smallRNA-Seq
39	MTC_3	Tissue	Frozen	M	Thyroid	49	men2						NO		ALIVE	TSO500, RNA-Seq, aCGH
40	MTC_30	RNA	Frozen	F	Thyroid	32.1205	Fam						NO		ALIVE	RNA-Seq, smallRNA-Seq
41	MTC_31	RNA	Frozen	F	Thyroid	78.6466	no						NO		ALIVE	RNA-Seq, smallRNA-Seq
42	MTC_32	RNA	Frozen	M	Thyroid	66.5836	no						NO		ALIVE	RNA-Seq, smallRNA-Seq
43	MTC_33	RNA	Frozen	F	Thyroid	64.063	no						NO		ALIVE	RNA-Seq, smallRNA-Seq
44	MTC_34	RNA	Frozen	F	Thyroid	70.6603	no						NO		Progression	RNA-Seq, smallRNA-Seq
45	MTC_35	RNA	Frozen	M	Thyroid	66.2219	no						NO		Progression	RNA-Seq, smallRNA-Seq
46	MTC_36	RNA	Frozen	M	Thyroid	81.1288	no						YES		Progression	RNA-Seq, smallRNA-Seq
47	MTC_37	RNA	Frozen	F	Thyroid	57.011	no						YES		Progression	RNA-Seq, smallRNA-Seq
48	MTC_4	Tissue	Frozen	F	Thyroid	52	men2						NO		ALIVE	TSO500, RNA-Seq, aCGH
49	MTC_5	Tissue	Frozen	M	Thyroid	68	no			0.7		0.8	NO		ALIVE	TSO500, RNA-Seq, smallRNA-Seq, aCGH
50	MTC_6	Tissue	Frozen	F	Thyroid	66	no			0.55		0.4	YES	lymph nodes	ALIVE	TSO500, RNA-Seq, smallRNA-Seq, aCGH
51	MTC_7	Tissue	Frozen	M	Thyroid	39	no			0.7		0.5	NO		ALIVE	RNA-Seq, smallRNA-Seq, aCGH
52	MTC_8	Tissue	Frozen	M	Thyroid	67	no						YES	hepatic	ALIVE	TSO500, RNA-Seq, smallRNA-Seq
53	MTC_9	Tissue	Frozen	F	Thyroid	40	no			0.65		0.7	NO		ALIVE	TSO500, RNA-Seq, smallRNA-Seq, aCGH
54	p-NET_1	Tissue	Frozen	M	Pancreas	68	no	G2	0.15				NO		DECEASED	TSO500, RNA-Seq, smallRNA-Seq
55	p-NET_10	Tissue	FFPE	M	Pancreas	49	no	G2	0.06	0.8	0.75		NO	no	ALIVE	TSO500, RNA-Seq, aCGH
56	p-NET_11	Tissue	FFPE	M	Pancreas	72	no	G1	0.02	0.45	0.45		YES	hepatic, kidney, lymph nodes	ALIVE	TSO500, RNA-Seq, smallRNA-Seq, aCGH
57	p-NET_12	Tissue	FFPE	M	Pancreas	61	no	G2		0.7	0.7		NO	no	ALIVE	TSO500, RNA-Seq, smallRNA-Seq, aCGH
58	p-NET_13	Tissue	Frozen	F	Pancreas	23	no	G2	0.03				NO		ALIVE	TSO500, smallRNA-Seq
59	p-NET_2	Tissue	Frozen	M	Pancreas	57	no	G1	0.02				NO		ALIVE	TSO500, RNA-Seq, smallRNA-Seq, aCGH
60	p-NET_3	Tissue	Frozen	F	Pancreas	71	no	G1	0.02				NO		DECEASED	TSO500, RNA-Seq, smallRNA-Seq
61	p-NET_4	Tissue	Frozen	F	Pancreas	68	no	G1	0.02				NO		ALIVE	TSO500, RNA-Seq, smallRNA-Seq, aCGH
62	p-NET_5	Tissue	Frozen	M	Pancreas	44	no	G2	0.17				NO		ALIVE	TSO500, RNA-Seq, smallRNA-Seq, aCGH
63	p-NET_6	Tissue	Frozen	F	Pancreas	46	no	G1	0.02				NO		ALIVE	TSO500, smallRNA-Seq
64	p-NET_7	Tissue	Frozen	M	Pancreas	72	no	G2	0.17				NO		ALIVE	TSO500, smallRNA-Seq, aCGH
65	p-NET_8	Tissue	Frozen	M	Pancreas	56	no	G2	0.03				NO		ALIVE	TSO500, RNA-Seq, smallRNA-Seq, aCGH
66	p-NET_9	Tissue	Frozen	M	Pancreas	35	men1	G1	0.01				NO		ALIVE	TSO500, RNA-Seq, smallRNA-Seq, aCGH
