# Supplementary material for: Identification of functional pathways and molecular signatures in neuroendocrine neoplasms by multi-omics analysis
Source: J Transl Med. 2022 Jul 6;20:306. doi: 10.1186/s12967-022-03511-7 (PMC9258165; doi:10.1186/s12967-022-03511-7)
Supplement: Supplementary file 4 — Additional file 4: Table S3. RNA_Seq all counts. [file 12967_2022_3511_MOESM4_ESM.xlsx]

## Sheet: ALL_counts_RNASeq_rpn
Table S3: RNA_Seq All counts
Gene_ID	lung-NET_1	I-NET_8	p-NET_10	MET_1	I-NET_6	I-NET_3	p-NET_12	I-NET_9	I-NET_7	MET_5	MET_3	I-NEC_10	p-NET_11	I-NEC_1	I-NET_4	MET_2	I-NET_5	MET_4	I-NEC_2	MTC_12	MTC_2	MTC_13	MTC_16	MTC_9	MTC_5	MTC_8	MTC_17	MTC_15	MTC_14	MTC_7	MTC_10	MTC_3	MTC_4	MTC_6	MTC_11	MTC_1	p-NET_2	p-NET_9	p-NET_3	p-NET_1	p-NET_8	p-NET_5	p-NET_4	MTC_31	MTC_32	MTC_33	MTC_34	MTC_35	MTC_36
DDX11L1	0	0	0	0	0	0	0	0	0	0	0	0	0	0	0	0	0	0	0	0	0	0	0	0	0	0	0	0	0	0	0	0	0	0	0	0	0	0	0	0	1	7	0	0	0	0	0	0	1
WASH7P	0	29	0	0	40	0	41	40	0	184	2	19	94	17	0	13	115	80	100	7	0	0	0	1	0	0	1	0	0	2	0	0	0	0	0	1	29	27	179	5	219	40	126	3	4	4	5	1	0
MIR6859-1	0	0	0	0	0	0	0	0	0	0	0	0	0	0	0	0	0	0	0	0	0	0	0	0	0	0	0	0	0	0	0	0	0	0	0	0	0	0	0	0	0	0	0	0	0	0	0	1	0
MIR1302-2HG	0	0	0	0	0	0	0	0	0	0	0	0	0	0	0	0	0	0	0	0	0	0	0	0	0	0	0	0	0	0	0	0	0	0	0	0	0	0	0	0	0	0	0	0	0	0	0	0	0
MIR1302-2	0	0	0	0	0	0	0	0	0	0	0	0	0	0	0	0	0	0	0	0	0	0	0	0	0	0	0	0	0	0	0	0	0	0	0	0	0	0	0	0	0	0	0	0	0	0	0	0	0
FAM138A	0	0	0	0	0	0	0	0	0	0	0	0	1	0	0	0	0	0	0	0	0	0	0	0	0	0	0	0	0	0	0	0	0	0	0	0	0	0	0	0	0	0	0	0	0	0	0	0	0
OR4G4P	0	0	0	0	0	0	0	0	0	0	0	0	0	0	0	0	0	0	0	0	0	0	0	0	0	0	0	0	0	0	0	0	0	0	0	0	0	0	0	0	0	0	0	0	0	0	0	0	0
OR4G11P	0	0	0	0	0	0	0	0	0	0	0	0	0	0	0	0	0	0	0	0	0	0	0	0	0	0	0	0	0	0	0	0	0	0	0	0	0	0	0	0	0	0	0	0	0	1	0	0	0
OR4F5	0	0	0	0	0	1	0	0	0	0	0	0	0	0	0	0	0	0	0	0	0	0	0	0	0	0	0	0	0	0	0	0	0	0	0	0	0	1	0	0	0	4	0	0	0	0	0	0	0
AL627309.1	0	2	0	1	17	0	0	0	17	0	0	2	7	0	0	1	2	2	0	2	0	1	2	6	0	1	3	4	2	1	1	0	2	0	0	2	0	0	0	0	2	2	0	2	1	3	6	0	0
AL627309.3	0	0	0	0	0	0	0	0	0	0	0	0	0	0	0	0	0	0	0	0	0	0	0	0	0	0	0	0	0	0	0	0	0	0	0	0	0	0	0	0	0	0	0	0	0	0	0	0	0
CICP27	0	0	0	0	0	0	0	0	0	0	0	0	0	2	0	0	0	0	0	0	0	0	0	0	0	0	0	0	0	0	0	0	0	0	0	0	0	0	0	0	0	0	0	0	0	0	0	0	0
AL627309.6	0	19	0	8	19	19	22	50	92	13	0	2	28	24	0	2	6	5	10	4	0	0	7	6	1	0	2	2	1	2	0	2	1	0	0	8	0	8	0	0	4	0	1	0	1	0	0	0	0
AL627309.7	2	104	1	132	163	30	96	285	292	24	2	20	197	113	0	13	46	4	47	1	0	3	3	5	0	0	4	2	1	3	1	1	0	0	0	10	0	13	25	1	16	12	2	0	1	0	3	0	0
AL627309.2	0	0	0	0	0	0	0	0	3	0	0	0	1	0	0	0	0	0	0	0	0	0	0	0	0	0	0	0	0	0	0	0	0	0	0	0	0	0	0	0	0	7	0	0	0	0	0	0	0
AL627309.5	0	2	0	0	0	0	2	0	0	0	0	1	1	2	0	0	0	0	0	6	0	2	3	15	2	0	4	3	2	3	2	1	3	1	0	11	1	6	1	0	2	0	0	1	4	4	16	3	2
RNU6-1100P	0	0	0	0	0	0	0	0	0	0	0	0	0	0	0	0	0	0	0	0	0	0	0	0	0	0	0	0	0	0	0	0	0	0	0	0	0	0	0	0	0	0	0	0	0	0	0	0	0
AL627309.4	0	0	0	0	0	0	0	0	0	0	0	0	0	0	0	0	0	0	0	0	0	0	0	0	0	0	0	0	0	0	0	0	0	0	0	0	0	0	0	0	0	0	0	0	0	0	0	0	0
FO538757.1	0	2	0	0	0	0	3	2	0	0	0	1	13	0	0	4	0	0	0	0	0	0	0	0	0	0	0	0	2	0	0	0	0	0	2	1	9	3	3	53	8	233	5	0	0	0	0	2	0
WASH9P	43	355	183	82	548	0	525	869	1072	168	29	173	931	197	58	210	751	792	974	25	0	6	10	4	5	5	5	8	18	12	4	14	6	10	2	18	152	143	1037	314	751	129	560	3	5	9	9	10	2
MIR6859-2	0	0	0	0	0	0	0	0	0	0	0	0	0	0	0	0	0	0	0	0	0	0	0	0	0	0	0	0	0	0	0	0	0	0	0	0	0	0	0	0	0	0	0	0	0	0	0	0	0
AP006222.1	0	1	1	0	0	2	0	1	1	0	0	1	3	0	0	0	0	5	0	0	0	1	0	7	3	1	2	5	3	3	8	6	1	1	6	18	1	0	0	2	3	3	3	8	3	5	16	9	1
AP006222.2	0	0	0	0	0	0	1	0	0	0	0	0	0	0	0	0	0	0	0	0	0	0	0	3	1	0	0	0	0	7	2	0	0	0	0	0	0	0	0	0	0	0	0	0	0	1	1	1	0
RPL23AP24	0	8	0	0	0	0	3	0	0	0	0	0	0	0	0	2	0	0	0	0	0	0	0	0	0	0	0	0	0	0	0	0	0	0	0	0	0	0	0	0	0	0	0	0	0	0	0	0	0
AL732372.1	0	0	0	0	0	0	0	0	0	0	0	0	0	0	0	0	0	0	0	0	0	0	0	0	0	0	0	0	0	0	0	0	0	0	0	0	0	0	0	0	0	0	0	0	0	0	0	0	0
AL732372.2	22	48	0	69	0	0	284	0	0	57	1	2	27	1	0	6	153	549	7	8	0	9	8	26	1	6	8	16	4	8	2	6	7	0	3	18	9	20	67	0	8	11	33	5	13	0	50	8	5
WBP1LP7	0	0	0	0	0	0	0	0	0	0	0	0	0	0	0	0	0	0	0	0	0	0	0	0	0	0	0	0	0	0	0	0	0	0	0	0	0	0	0	0	0	0	0	0	0	0	0	0	0
OR4F29	0	1	0	0	0	0	0	0	0	0	0	0	0	0	0	0	0	0	0	0	0	0	0	0	0	0	0	0	0	0	0	0	0	0	0	0	0	0	0	0	0	0	0	0	0	0	0	0	0
CICP7	0	0	0	0	0	0	0	0	0	0	0	0	0	0	0	0	0	0	0	0	0	0	0	0	0	0	0	0	0	0	0	0	0	0	0	0	0	0	0	0	0	0	0	0	0	0	0	0	0
AL732372.3	0	0	0	0	17	0	0	4	0	0	0	0	2	3	0	0	0	0	0	0	0	0	0	0	0	0	0	0	0	0	0	0	0	0	0	0	0	0	0	0	0	0	0	0	0	0	0	0	0
FO681485.1	0	0	0	0	0	0	0	0	0	0	0	0	0	0	0	0	0	0	0	0	0	0	0	0	0	0	0	0	0	0	0	0	0	0	0	0	0	0	0	0	0	0	0	0	0	0	2	1	0
AL669831.3	1	1	0	13	0	0	3	1	0	0	1	0	5	0	0	6	1	7	2	4	0	2	0	1	2	2	0	1	1	0	0	1	1	1	1	1	10	2	0	3	0	22	1	0	1	4	4	1	4
AC114498.1	0	0	0	0	0	0	0	3	0	0	0	0	0	0	0	0	4	0	0	0	0	0	0	0	0	0	0	0	0	1	0	0	0	0	0	0	0	0	0	0	0	4	0	0	0	0	1	0	0
MTND1P23	0	0	19	0	0	0	0	0	0	0	0	0	0	0	0	1	0	2	1	0	1	0	1	616	2	0	1	11	0	2	1	1	3	2	3	0	0	0	0	0	0	0	0	0	0	0	0	0	3
MTND2P28	108	1	3	19	0	1	93	0	0	0	6	10	23	0	15	128	8	37	18	6	34	24	58	129	44	51	139	769	50	250	87	112	28	47	139	17	0	0	0	3	0	0	2	0	64	13	16	16	8
MTCO1P12	1	0	2	0	0	0	18	0	1	0	0	1	1	0	2	5	0	1	1	215	37	23	40	3873	59	65	316	359	267	350	128	85	94	139	235	74	0	0	0	0	0	0	0	17	29	21	19	25	91
AC114498.2	0	0	0	0	0	0	0	0	0	0	0	0	0	0	0	0	0	0	0	0	0	0	1	1	0	0	0	0	0	1	0	0	0	0	0	0	0	0	0	0	0	0	0	0	0	0	1	0	0
MTCO2P12	2	0	0	0	0	0	19	0	0	0	1	1	31	1	0	23	1	10	1	0	4	4	10	6	3	3	32	14	13	29	8	8	9	10	39	3	0	0	0	1	0	0	0	0	0	1	3	2	16
MTATP8P1	1	0	0	0	0	0	1	0	0	0	0	0	0	0	0	0	0	0	0	0	0	0	0	0	0	0	1	0	0	0	0	0	0	0	0	0	0	0	0	0	0	0	0	0	0	0	0	0	1
MTATP6P1	72	3	10	31	0	6	580	1	7	3	23	55	60	15	24	387	26	209	55	239	52	15	154	235	82	143	233	714	172	463	85	307	80	136	456	67	1	0	2	14	0	7	40	1	108	29	42	30	441
MTCO3P12	1	2	0	0	0	0	3	0	0	0	0	0	0	0	0	3	0	1	0	4	0	1	0	5	11	2	34	20	33	30	12	6	12	14	30	2	0	0	0	0	0	0	0	1	4	3	3	4	11
WBP1LP6	0	0	0	0	0	0	0	0	0	0	0	0	0	0	0	0	0	0	0	0	0	0	0	0	0	0	0	0	0	0	0	0	0	0	0	0	0	0	0	0	0	3	0	0	0	0	0	0	0
OR4F16	0	2	0	0	0	0	0	0	0	0	0	0	3	0	0	0	0	2	0	0	0	0	0	0	0	0	0	0	0	0	0	0	0	0	0	0	0	0	0	0	0	0	0	0	0	0	1	0	0
CICP3	0	0	0	0	0	0	0	0	0	0	0	2	0	0	0	0	0	0	0	0	0	0	0	0	0	0	0	0	0	0	0	0	0	0	0	0	0	0	0	0	0	0	0	0	0	0	1	0	0
AL669831.1	406	1124	421	430	278	160	1701	405	310	104	249	153	2191	111	0	490	1239	1908	1286	43	1	13	8	18	1	5	12	9	0	11	6	11	3	3	3	34	30	137	68	99	277	86	368	13	28	12	29	25	6
RNU6-1199P	0	0	0	0	0	0	0	0	0	0	0	0	0	0	0	0	0	0	0	0	0	0	0	0	0	0	1	1	0	0	0	0	0	0	0	0	0	0	0	0	0	0	0	3	4	1	1	1	0
AL669831.2	0	0	0	0	0	0	0	0	0	0	0	0	0	0	0	0	0	0	0	0	0	0	0	0	0	0	0	0	0	0	0	0	0	0	0	0	0	0	0	0	0	0	0	0	0	0	0	0	0
LINC01409	13	38	0	0	0	0	124	16	52	23	79	0	51	1	116	155	0	83	15	17	1	13	1	10	10	8	14	19	6	6	9	8	19	14	6	33	4	2	0	9	2	19	5	46	36	39	29	36	40
AL669831.6	0	0	0	0	0	0	0	0	0	0	0	0	0	0	0	0	0	0	0	0	0	0	0	0	0	0	0	0	0	0	0	0	0	0	0	0	0	0	0	0	0	0	0	0	0	0	0	0	0
AL669831.4	18	25	0	2	16	10	219	14	0	0	22	2	55	14	11	33	19	49	17	29	0	27	1	8	29	54	20	13	9	30	9	78	49	34	14	7	6	6	3	8	2	11	30	23	19	11	33	26	9
FAM87B	0	0	0	0	0	0	0	0	0	0	0	0	0	0	0	0	0	0	0	6	0	1	1	0	1	5	0	2	1	1	1	6	1	1	2	6	0	0	0	0	0	0	0	1	0	0	0	1	0
LINC01128	6	12	0	10	4	0	34	22	1	0	2	1	58	17	8	15	13	33	26	562	4	89	80	296	291	281	827	382	93	388	553	170	83	569	137	669	6	12	9	4	16	16	51	614	638	404	812	613	309
LINC00115	35	71	1	17	281	74	39	382	40	15	18	13	48	29	5	26	97	34	30	5	1	1	6	18	4	3	10	9	6	17	13	5	5	14	4	11	3	8	5	0	124	10	25	5	9	4	14	8	9
AL669831.7	0	0	0	0	0	0	0	0	0	0	0	0	0	0	0	0	0	0	0	1	1	0	3	4	2	0	8	1	0	2	2	0	0	3	3	3	0	0	0	0	0	0	0	1	5	3	3	2	4
FAM41C	0	0	0	0	0	0	47	0	0	0	0	0	8	0	0	16	0	20	0	0	0	0	0	0	0	0	0	3	1	0	0	0	0	0	3	0	0	0	0	11	0	21	0	0	0	0	0	1	2
TUBB8P11	0	0	0	0	0	0	3	2	0	0	0	1	13	0	0	4	0	2	5	0	0	0	1	2	1	0	1	0	0	0	0	0	0	0	0	0	3	0	3	19	6	52	0	0	0	2	0	0	2
AL669831.5	0	0	0	0	0	0	0	0	0	0	0	0	0	0	0	0	0	0	0	0	0	0	0	0	0	0	0	0	0	0	0	0	0	0	5	0	0	0	0	0	0	0	0	0	0	0	0	0	0
AL645608.6	0	0	0	0	0	0	0	0	0	0	0	0	0	0	0	1	0	0	0	0	0	0	1	0	0	1	6	0	0	2	0	0	0	3	1	1	0	0	0	0	0	0	0	0	1	7	0	0	0
AL645608.2	0	0	0	0	0	0	1	0	0	0	0	0	0	0	0	3	0	3	1	0	0	0	3	0	5	4	19	2	0	0	2	3	0	6	2	6	0	0	0	0	0	0	0	2	6	32	1	4	1
AL645608.4	0	0	0	0	0	0	1	0	0	0	0	0	0	1	0	5	0	0	0	0	0	0	0	0	0	0	2	0	0	0	0	0	0	0	0	0	0	0	0	0	0	0	0	1	0	1	0	1	0
LINC02593	0	0	0	0	0	0	1	0	0	0	0	0	0	0	0	8	1	4	0	28	2	10	63	70	155	301	441	38	2	57	404	38	8	125	11	206	0	0	0	0	0	0	0	34	38	125	1	41	10
SAMD11	13	47	7	1	143	4	42	263	0	0	5	0	57	37	4	384	92	53	228	34	2	6	122	92	302	445	740	48	13	168	633	68	20	212	15	228	4	2	289	19	105	41	5	67	20	151	0	36	9
NOC2L	162	865	307	366	1066	128	1224	1413	206	535	397	307	1061	711	36	864	813	1584	3239	782	6	133	285	276	654	667	1001	511	729	609	875	532	472	539	159	499	1398	478	3719	544	1618	258	1624	105	183	77	166	262	64
KLHL17	5	35	4	13	72	1	43	115	2	18	7	8	42	45	0	26	65	148	183	63	1	36	63	35	54	75	111	71	34	84	84	27	33	33	12	98	13	51	78	22	44	15	69	4	12	9	7	21	7
PLEKHN1	0	3	0	0	0	0	2	10	0	8	0	6	0	5	0	4	3	2	5	4	0	12	2	4	1	5	3	7	8	3	1	4	1	9	1	1	0	0	5	11	5	3	0	0	0	1	0	0	0
PERM1	0	2	0	0	0	0	4	2	32	0	0	0	3	1	0	4	3	3	5	3	2	0	3	1	0	6	1	1	0	2	2	0	3	1	1	11	3	0	0	7	0	38	2	0	0	0	0	0	0
AL645608.7	0	0	0	0	0	0	0	4	0	0	0	0	0	0	0	0	0	0	0	47	1	0	32	6	0	21	3	15	1	10	0	3	6	3	7	43	0	0	0	0	0	0	0	1	1	4	2	0	7
HES4	8	65	0	9	77	8	34	125	8	137	15	2	20	136	0	16	83	39	15	231	0	11	94	44	27	119	41	18	70	97	85	63	10	19	10	49	11	0	11	0	6	4	12	2	0	0	4	5	1
ISG15	1	9	15	26	50	13	23	41	13	38	0	5	9	24	0	22	18	33	7	198	1	32	92	32	125	270	185	482	140	149	262	377	30	64	21	57	0	3	1	3	5	4	20	2	5	27	0	13	2
AL645608.3	1	0	0	0	0	0	1	0	0	0	0	0	1	0	0	1	0	0	0	0	0	0	0	0	0	0	0	0	0	1	1	0	0	0	1	0	0	0	0	0	0	6	1	0	0	0	0	0	0
AL645608.1	0	0	0	0	0	0	1	0	0	0	0	0	0	0	0	0	0	1	0	0	1	0	0	0	0	0	0	0	0	0	0	0	1	0	0	0	0	0	0	0	0	0	0	0	0	0	0	0	0
AGRN	54	1029	278	279	1589	257	1021	2142	256	656	213	773	1458	1342	32	4530	764	598	958	1470	11	89	1602	856	673	2948	579	836	3501	1655	1519	1986	1403	356	72	1040	406	259	664	50	383	113	268	4	19	24	107	108	74
AL645608.5	0	0	0	0	0	0	0	0	0	0	0	0	0	0	0	0	0	0	0	0	0	0	0	0	0	0	0	0	0	0	0	0	0	0	0	0	0	0	0	0	0	0	0	0	0	0	0	0	0
AL390719.1	0	1	0	1	2	0	12	2	0	0	0	1	0	3	0	2	3	10	1	4	0	0	0	1	3	1	3	0	2	9	5	0	0	2	5	4	0	0	0	0	0	1	0	0	0	0	5	4	3
AL645608.8	0	0	0	0	0	0	0	0	0	0	0	0	0	0	0	0	0	0	0	0	0	0	0	1	0	1	0	0	0	2	0	0	0	0	0	0	0	0	0	0	0	0	0	0	0	0	0	1	0
RNF223	0	0	0	0	8	0	0	2	0	0	0	0	0	4	0	0	0	0	0	0	1	0	0	1	1	9	1	0	0	2	5	0	0	0	0	0	0	0	0	0	0	0	0	0	0	0	1	0	0
C1orf159	1	26	0	16	7	12	31	30	16	20	0	6	26	9	2	46	26	101	56	85	2	38	57	67	68	86	104	127	82	93	72	68	66	39	7	149	3	11	13	6	18	9	10	7	11	3	21	10	14
AL390719.3	0	0	0	0	0	0	0	0	0	0	0	0	0	0	0	0	0	0	0	0	0	0	0	1	0	0	0	0	0	0	0	0	0	1	0	1	0	0	0	1	0	0	0	0	0	0	1	0	0
LINC01342	0	1	0	1	5	0	3	13	0	0	0	1	0	1	0	1	4	8	0	0	1	2	1	8	0	1	0	1	0	1	3	0	0	0	0	27	0	0	0	0	0	1	0	0	0	0	1	0	0
MIR200B	1	10	11	2	2	0	6	63	0	0	0	1	12	24	0	0	23	13	0	0	0	0	3	5	0	1	8	1	1	10	2	1	0	0	0	6	0	0	6	0	7	1	1	0	1	0	0	0	0
MIR200A	0	20	17	11	60	4	4	127	11	22	0	2	13	36	0	3	9	18	0	0	0	0	7	4	2	2	19	4	1	12	4	2	0	1	1	23	0	0	19	2	22	0	4	1	2	1	0	2	3
MIR429	2	13	0	4	5	0	8	22	8	0	0	1	15	10	0	4	3	17	0	2	0	0	12	7	1	2	12	6	1	10	2	2	2	2	0	10	0	1	1	0	17	0	3	0	2	2	2	3	3
AL390719.2	0	1	0	0	0	0	0	0	0	0	0	0	0	4	0	0	1	5	0	14	0	0	24	37	24	26	84	12	15	43	37	17	25	13	0	135	0	0	0	0	0	0	0	4	9	5	4	17	3
TTLL10-AS1	0	0	0	0	0	0	160	8	0	0	0	0	10	0	0	4	7	178	0	2	0	0	6	3	3	1	4	20	0	1	9	0	0	1	1	10	5	0	8	19	6	47	56	0	0	0	0	0	1
TTLL10	12	45	0	10	107	7	32	88	12	71	1	19	187	21	0	5	115	101	1	14	1	2	25	18	10	9	44	11	0	12	4	5	4	18	1	52	5	6	89	27	78	14	39	6	5	2	6	2	2
TNFRSF18	0	1	0	0	3	0	2	4	0	12	0	1	3	9	7	0	1	1	2	0	1	24	2	0	0	7	1	12	1	3	1	0	0	2	3	1	0	0	0	0	1	1	1	0	2	0	0	0	0
TNFRSF4	0	1	0	4	1	0	6	1	2	2	0	2	1	5	0	2	0	2	4	58	1	64	17	10	1	18	11	19	24	16	22	19	6	8	8	12	0	2	9	3	4	1	0	0	0	0	0	2	0
SDF4	257	695	405	361	428	141	562	621	208	154	422	117	810	358	204	536	712	650	662	1315	12	183	507	651	1448	1617	2887	1006	1778	1980	2798	1346	1031	993	355	798	654	1069	1754	295	870	163	1806	104	102	98	93	325	75
B3GALT6	1	0	0	4	0	0	9	2	3	5	1	1	1	4	0	7	0	12	3	155	2	43	73	105	199	256	307	134	357	207	392	193	185	161	63	169	0	1	0	0	1	0	4	39	51	24	36	69	34
C1QTNF12	0	5	0	0	1	0	1	2	5	1	0	0	1	2	0	8	1	0	1	5	0	1	3	6	1	8	3	3	7	4	6	0	6	1	0	4	0	0	0	3	1	3	0	0	0	2	0	0	0
AL162741.1	0	2	0	0	0	2	0	3	0	0	0	3	0	6	0	14	0	0	2	3	0	1	5	4	2	2	2	4	2	5	1	2	2	1	1	7	0	0	0	0	0	0	0	1	2	1	0	1	0
UBE2J2	84	266	91	115	149	30	567	194	14	88	158	44	257	120	92	662	235	485	398	347	7	124	106	242	360	413	501	308	412	451	466	348	209	237	84	379	15	49	88	26	54	36	166	48	91	47	103	90	42
LINC01786	0	0	0	0	0	0	0	1	0	0	0	1	0	2	0	8	0	2	0	6	0	7	6	7	13	4	13	5	3	7	12	9	4	3	2	26	0	0	0	0	0	0	0	3	3	0	1	3	0
SCNN1D	7	44	0	6	83	27	77	29	54	11	9	3	48	22	0	308	49	243	17	39	1	25	34	53	28	42	100	57	39	18	50	43	29	17	2	221	1	38	137	19	8	7	37	4	6	5	6	10	2
ACAP3	116	614	255	243	1285	253	599	2068	459	260	339	141	652	709	198	152	882	1878	445	633	11	132	1289	468	333	549	951	572	292	960	473	316	164	347	79	1410	157	397	1045	33	751	48	801	61	124	105	133	183	87
MIR6726	0	0	0	0	0	0	0	0	0	0	0	0	1	0	0	0	0	0	1	0	0	0	0	0	0	0	0	0	0	0	0	0	0	0	0	1	0	0	0	0	0	0	0	0	0	0	0	0	0
PUSL1	1	29	25	9	38	0	29	37	6	15	11	10	28	18	42	29	20	40	38	94	1	32	46	44	67	105	116	41	78	72	102	75	40	42	14	101	1	24	5	0	45	6	34	14	6	7	17	10	4
INTS11	83	347	157	135	524	108	517	483	519	228	65	127	512	241	222	626	442	876	827	612	13	275	682	408	489	598	944	665	704	673	553	689	509	447	151	870	210	252	1255	126	533	96	545	86	120	69	142	154	90
MIR6727	0	0	0	0	0	0	0	0	0	0	0	0	0	0	0	0	0	0	0	0	0	0	0	0	0	0	0	0	0	0	0	0	0	0	0	0	0	0	0	0	0	0	0	0	0	0	0	0	0
AL139287.1	1	1	0	0	1	0	4	3	3	0	0	2	0	2	0	11	0	0	1	16	1	11	35	20	5	5	16	26	2	16	6	9	6	5	0	61	0	0	0	0	0	0	0	12	22	6	22	14	34
CPTP	3	19	5	11	15	24	29	23	14	12	120	6	17	6	2	50	14	25	19	73	3	51	29	65	88	156	75	97	304	102	163	197	125	36	10	93	5	8	13	1	10	5	20	1	9	1	14	11	5
TAS1R3	0	5	0	0	1	0	1	5	1	4	11	8	2	17	0	8	3	10	3	9	0	5	2	41	4	31	16	18	2	89	39	6	3	5	0	5	3	6	9	12	1	3	6	3	0	5	8	1	0
DVL1	48	209	161	125	224	72	339	328	339	139	65	164	301	235	8	630	184	465	519	474	13	112	213	265	536	730	652	443	971	569	667	613	423	291	77	302	237	248	473	81	238	42	326	13	22	22	51	58	12
MIR6808	0	0	0	0	0	0	0	0	0	0	0	0	0	0	0	0	0	0	0	0	0	0	0	0	0	0	0	0	0	0	0	0	0	0	0	0	0	0	0	0	0	0	0	0	0	0	0	0	0
MXRA8	11	193	39	10	212	12	183	139	74	91	0	7	30	114	49	691	224	96	54	520	7	15	119	109	341	937	202	771	178	482	622	626	272	261	114	130	2	18	64	13	32	25	112	1	13	5	38	39	40
AURKAIP1	45	106	31	80	164	39	164	145	12	37	39	36	98	149	28	257	104	124	218	343	4	53	121	143	447	522	576	260	890	347	637	509	363	288	84	200	15	92	85	39	82	35	213	22	24	23	31	57	14
NDUFB4P8	0	0	0	0	0	0	1	0	0	0	0	0	0	0	0	0	0	0	0	0	0	0	0	0	0	0	0	0	2	0	0	0	0	0	0	0	0	0	0	0	0	0	0	0	0	0	0	0	0
CCNL2	246	1385	568	149	2174	235	1688	2321	957	678	311	460	1850	683	291	2292	1925	2314	2856	1415	13	754	1487	1055	888	1125	1727	1662	970	1393	912	1033	932	1386	356	2538	499	621	2756	132	1745	249	1066	876	722	478	1068	1104	326
MRPL20-AS1	5	30	16	2	16	7	46	21	18	44	17	2	31	19	42	43	25	60	33	117	3	44	23	76	203	160	217	161	245	177	274	195	184	109	45	109	0	37	1	5	34	6	67	49	25	35	38	76	35
MRPL20	131	377	85	186	316	123	651	478	125	192	476	145	460	236	62	590	417	556	515	411	4	119	82	155	717	548	843	321	783	424	835	642	499	544	160	251	43	224	92	25	158	82	1130	133	120	112	156	235	98
RN7SL657P	0	0	0	0	0	0	0	0	0	0	0	0	0	0	0	0	0	0	0	0	0	0	0	0	0	0	0	0	0	0	0	0	0	0	0	0	0	0	0	0	0	0	0	0	0	0	0	0	0
AL391244.2	1	9	1	6	0	0	27	6	0	8	0	5	2	5	0	54	2	20	4	9	2	7	11	13	14	24	17	19	14	20	20	18	20	11	2	29	0	1	0	0	0	3	2	15	13	14	24	10	5
ANKRD65	0	3	3	1	0	0	22	6	0	0	0	0	23	46	0	9	2	49	22	99	3	19	16	30	43	222	14	42	45	311	451	52	25	99	5	240	11	24	146	20	164	11	48	108	12	4	83	45	6
AL391244.1	0	0	0	0	0	0	0	0	0	0	0	0	0	0	0	0	0	0	0	4	0	0	0	1	1	9	0	0	0	4	5	1	0	2	0	6	0	0	0	0	0	0	0	1	0	1	1	1	0
TMEM88B	0	0	0	0	0	0	0	0	0	0	0	0	0	0	0	0	0	0	0	0	0	0	0	0	0	0	0	0	0	0	0	0	0	0	0	0	0	0	0	0	0	0	0	0	0	0	0	0	0
LINC01770	0	0	0	0	0	0	0	0	0	0	0	0	0	0	0	0	0	0	0	16	0	1	3	2	1	6	1	1	2	5	26	6	2	7	1	18	0	0	0	0	0	0	0	0	0	0	0	3	0
VWA1	6	18	40	10	19	4	33	28	1	23	13	9	33	20	0	57	11	15	11	1858	2	52	499	368	520	892	513	150	1673	875	1588	401	412	408	94	512	0	125	5	4	44	1	112	17	12	12	21	62	18
ATAD3C	5	37	25	29	71	22	123	108	1	104	12	148	50	55	1	288	12	104	28	63	3	6	36	68	127	174	314	62	118	111	163	61	100	74	18	91	90	49	318	2	161	35	112	23	28	19	31	39	22
ATAD3B	20	228	230	33	241	21	221	361	122	423	12	216	248	418	11	313	201	502	800	379	6	111	177	181	193	206	530	405	166	334	332	180	132	143	53	442	627	398	2247	456	836	86	467	40	66	69	120	141	28
AL645728.2	0	4	0	0	0	0	4	5	19	0	0	5	3	16	0	14	12	5	5	14	0	0	5	8	3	10	12	1	8	3	5	4	2	3	1	7	3	18	45	0	13	2	10	2	2	2	2	1	0
ATAD3A	22	180	47	19	135	18	215	142	21	143	262	191	162	343	75	264	91	416	809	161	0	38	63	56	101	144	184	120	290	140	143	132	109	74	17	108	109	255	319	63	257	55	520	13	15	20	7	34	6
TMEM240	0	22	1	0	29	0	4	4	0	0	0	6	10	0	0	12	0	8	1	6	2	0	11	7	10	18	37	9	16	18	24	12	4	2	2	8	2	14	10	3	17	12	21	1	2	2	0	1	0
SSU72	186	459	152	206	210	143	639	408	128	373	205	151	604	165	261	824	424	491	685	916	21	234	272	439	1241	1052	1629	732	1623	863	1545	1279	1037	962	278	660	171	190	299	104	455	163	540	264	255	192	277	408	200
AL645728.1	2	4	44	5	0	0	4	4	0	0	0	1	4	0	0	2	0	4	3	9	1	0	0	6	28	20	29	13	12	11	31	22	23	15	4	4	0	4	0	0	1	1	4	3	1	2	4	6	1
AL691432.3	0	0	0	0	0	0	0	0	0	0	0	0	0	0	0	0	0	0	0	0	1	0	0	0	0	0	0	0	0	0	0	0	0	0	0	0	0	0	0	0	0	0	0	0	0	0	0	0	0
FNDC10	0	0	0	2	0	4	17	0	0	0	0	2	3	4	0	1	2	11	2	24	0	3	3	10	67	31	27	16	141	10	44	67	70	20	6	7	0	0	0	0	0	0	7	0	0	0	2	5	0
AL691432.4	0	0	0	0	0	0	1	0	0	0	0	0	0	0	0	0	0	3	0	0	0	4	1	1	5	3	0	4	36	2	9	10	11	1	1	1	0	0	0	0	0	0	0	1	1	0	0	1	0
AL691432.2	1	7	5	5	23	0	30	40	38	0	0	4	10	20	27	2	7	20	1	189	4	20	34	176	355	312	509	79	266	98	521	235	251	209	34	184	1	7	4	0	7	0	4	61	39	28	41	70	80
MIB2	21	118	106	45	260	28	88	258	114	93	2	69	64	152	0	111	111	112	139	271	9	113	484	330	340	470	719	374	648	398	441	431	351	239	56	524	48	208	293	38	122	25	170	22	58	57	41	87	41
MMP23B	0	1	0	0	0	0	0	0	0	0	2	2	0	4	0	4	0	0	0	0	0	0	0	0	0	0	0	1	0	3	1	1	0	0	0	0	0	0	0	0	0	0	0	0	0	1	0	0	0
CDK11B	187	1103	164	314	877	262	1041	861	292	529	348	465	833	785	320	954	1016	1310	1636	224	4	103	163	64	74	167	227	114	123	111	100	192	106	125	65	115	1447	306	5227	1441	794	379	1047	33	54	36	61	52	28
FO704657.1	0	0	0	0	0	0	0	0	0	0	0	0	0	0	0	0	0	0	0	5	0	1	0	0	1	1	0	0	0	0	2	0	0	1	0	1	0	0	0	0	0	0	0	3	1	1	0	1	0
SLC35E2B	32	225	1	25	265	44	276	184	23	250	93	39	288	388	80	258	301	268	292	1051	3	307	118	394	426	521	568	588	526	459	686	438	415	298	61	826	56	96	237	15	84	53	113	223	287	152	180	329	156
AL691432.1	0	0	0	0	0	0	0	0	0	0	0	0	0	0	0	0	0	0	0	0	0	0	0	0	1	0	1	0	0	0	3	2	0	0	2	1	0	0	0	0	0	0	0	0	2	2	0	0	0
MMP23A	0	0	0	0	0	0	0	1	0	0	0	0	0	0	0	0	2	0	0	0	0	0	0	0	0	0	0	0	1	0	0	0	0	0	0	0	0	0	1	0	0	0	0	0	0	0	0	0	0
CDK11A	0	9	1	0	17	0	12	28	5	26	0	9	34	12	0	4	3	26	39	4	1	13	8	12	2	12	24	17	6	11	4	17	4	5	5	20	1	7	47	7	32	27	24	8	13	7	18	9	6
AL031282.2	11	12	2	5	5	2	120	20	7	5	0	7	27	38	28	42	20	50	19	79	0	26	16	47	16	46	85	60	28	63	64	59	36	18	3	115	3	3	2	3	13	3	8	36	51	40	47	52	24
AL031282.1	0	0	0	0	0	0	1	0	0	0	1	0	0	0	0	1	0	0	0	0	0	0	1	4	0	0	1	2	0	0	0	1	0	0	2	2	0	0	0	0	0	3	0	4	1	0	0	0	0
SLC35E2A	17	263	82	58	48	65	871	390	57	62	42	81	321	163	2	441	70	1144	202	362	6	100	86	204	134	373	350	195	112	155	258	280	92	57	47	329	7	25	0	3	48	27	216	195	166	107	422	173	172
NADK	98	330	42	174	300	80	518	396	106	192	247	97	381	260	205	603	398	575	741	704	9	184	219	223	467	844	861	654	602	719	722	713	275	401	164	474	160	124	367	56	351	78	388	88	142	81	159	237	84
GNB1	666	2212	862	1074	1342	591	7055	1733	917	1302	1745	378	4162	1076	907	1995	1724	6077	2899	4727	73	491	521	1193	4220	5694	6025	3592	2799	4768	6760	4409	2156	3132	1756	1694	89	1572	627	309	1133	601	5543	1119	1386	917	2206	2065	1119
AL109917.1	0	0	0	0	0	0	1	0	0	0	0	0	1	0	0	0	0	0	0	2	0	1	5	2	5	3	2	7	2	5	7	6	4	5	0	12	0	0	0	0	0	0	0	2	1	0	2	0	1
CALML6	0	1	7	0	0	0	5	1	0	0	0	0	2	15	0	4	8	3	2	0	0	3	0	0	0	0	6	2	1	0	0	2	3	2	2	4	5	0	8	2	0	15	1	3	0	0	1	0	0
TMEM52	0	0	90	0	0	0	45	0	0	0	0	1	0	63	32	10	0	2	5	0	0	0	0	0	0	0	0	1	7	4	0	9	3	1	1	1	12	0	3	3	0	6	2	0	0	0	0	0	0
CFAP74	3	1	0	1	3	10	2	0	0	0	0	1	3	58	0	6	0	12	4	21	0	0	21	4	1	0	9	1	5	0	1	4	1	4	6	4	2	0	98	30	3	68	0	1	4	1	5	0	1
AL391845.2	0	0	0	0	0	0	0	0	0	0	0	0	0	0	0	0	0	0	0	8	0	0	4	1	3	0	2	0	1	1	2	0	1	0	3	1	0	0	0	0	1	0	0	0	0	1	0	1	0
GABRD	0	2	0	7	0	0	7	0	0	0	8	0	20	25	0	14	0	25	18	148	3	1	50	15	7	13	33	1	51	6	43	3	1	12	12	17	1	14	131	17	12	21	11	1	1	0	4	6	0
AL391845.1	0	0	0	0	0	0	0	0	0	0	0	0	0	0	0	0	0	0	0	0	0	0	0	0	1	0	0	1	1	0	0	0	0	0	0	3	0	0	0	0	0	0	0	0	0	0	0	0	0
PRKCZ	101	274	61	101	241	99	468	372	30	178	124	49	245	256	37	339	306	385	212	224	5	91	170	177	317	226	386	203	495	202	361	388	413	227	55	307	90	203	393	73	824	127	628	76	75	53	72	76	55
AL590822.2	0	0	0	0	0	0	1	0	0	0	0	0	0	1	0	0	0	0	0	0	0	0	0	0	0	3	1	1	0	1	0	1	0	1	7	1	0	0	0	0	0	1	0	0	0	0	0	0	1
PRKCZ-AS1	1	8	0	0	8	0	13	6	3	0	0	0	1	4	0	1	1	13	4	21	0	5	2	20	11	24	11	6	5	13	13	5	6	8	5	32	0	0	0	0	0	4	0	1	4	1	4	1	5
FAAP20	32	204	176	67	261	79	257	269	86	76	92	82	284	146	33	118	184	379	231	242	7	73	182	167	171	305	347	237	327	223	262	292	156	121	49	344	14	56	78	29	97	27	166	36	46	24	47	45	40
AL590822.1	0	0	0	0	0	0	0	0	0	0	0	0	0	0	0	2	0	0	0	1	1	0	2	0	0	0	0	1	1	0	1	2	0	0	0	3	0	0	0	0	0	0	0	1	1	1	0	0	1
SKI	70	753	101	260	1032	51	630	889	275	422	63	175	411	790	120	455	664	545	1034	1249	26	544	429	624	443	2328	656	1109	665	670	799	1813	797	609	396	611	122	262	443	199	376	119	310	79	84	76	173	73	299
AL590822.3	0	0	0	0	0	0	0	0	0	0	0	0	0	0	0	1	0	0	0	6	1	0	4	3	15	12	3	6	7	4	3	14	23	5	4	3	0	0	0	0	0	0	0	1	0	0	0	0	2
MORN1	69	172	84	79	225	64	349	399	89	107	248	68	166	130	10	316	328	528	174	143	3	48	108	198	184	182	312	179	328	96	202	247	233	134	22	318	121	149	676	53	386	91	390	61	47	43	45	45	41
AL589739.1	0	0	0	0	0	0	0	0	0	0	0	0	0	0	0	0	0	0	0	0	0	0	1	2	1	3	0	0	2	0	3	1	3	0	0	3	0	0	0	0	0	0	0	0	0	0	1	0	2
AL513477.1	1	3	1	0	0	0	17	7	0	0	0	0	3	2	0	8	0	22	5	35	0	12	6	36	29	33	49	45	68	10	28	45	36	37	2	46	0	2	2	0	2	1	2	19	17	20	13	15	10
AL513477.2	0	0	1	0	0	0	1	0	0	0	0	1	0	0	0	2	0	0	0	2	0	1	1	4	3	2	8	3	2	2	5	5	3	3	3	7	0	0	0	0	0	0	0	4	9	7	10	1	2
RER1	232	974	100	397	492	221	1412	581	359	290	752	184	1080	295	136	1317	900	1107	914	815	7	237	202	359	992	1013	1738	640	1381	1253	1314	1108	1016	732	169	636	47	324	127	50	105	168	1096	252	285	194	341	422	180
PEX10	25	47	35	30	57	7	164	39	75	18	133	19	53	38	1	149	25	165	105	306	3	26	46	129	358	378	526	194	441	155	451	317	230	195	32	201	2	57	9	6	16	20	156	29	55	59	52	91	71
PLCH2	4	31	1	0	50	15	439	50	51	29	0	4	154	179	0	29	68	574	55	57	3	120	89	129	74	105	41	21	14	233	138	68	101	34	24	326	460	3	21634	243	3371	139	1412	5	17	5	47	6	2
AL139246.1	0	0	0	0	0	0	0	0	0	0	0	0	0	0	0	0	0	0	0	0	0	0	0	0	0	0	0	0	0	0	0	0	0	1	0	5	0	0	0	0	0	0	0	0	0	0	0	0	0
AL139246.4	0	0	0	0	0	0	0	0	0	0	0	0	0	0	0	0	0	0	0	0	0	0	1	0	1	0	0	0	0	0	0	0	0	0	0	2	0	0	0	0	0	0	0	0	0	0	0	0	0
PANK4	81	241	153	106	383	45	449	458	209	304	12	56	567	315	20	286	257	642	489	299	2	161	188	151	219	268	400	232	390	257	314	271	183	177	66	264	109	206	878	119	502	75	507	37	51	22	75	87	22
HES5	0	0	0	0	0	0	1	0	0	0	0	0	0	11	0	0	0	0	0	4	0	0	0	0	2	8	0	5	2	5	6	3	2	1	0	52	0	0	0	0	6	1	0	0	0	1	1	1	0
AL139246.5	0	0	0	0	0	0	0	0	0	0	0	0	0	2	0	0	0	0	0	31	0	7	10	21	21	30	25	32	13	6	39	2	6	3	0	48	0	0	0	1	0	0	0	1	0	0	1	2	0
TNFRSF14-AS1	11	45	0	0	3	11	18	14	1	1	1	14	50	34	0	3	84	24	19	60	2	66	100	111	50	68	105	39	7	154	106	49	31	127	33	9	60	8	283	8	53	1	12	18	75	21	44	54	16
TNFRSF14	101	607	99	245	857	251	430	1485	114	172	158	208	809	231	76	45	981	724	195	494	12	500	572	431	326	723	641	757	49	709	642	474	224	403	83	145	28	70	186	23	275	67	293	76	141	93	86	161	68
AL139246.2	0	0	0	0	0	0	0	0	0	0	0	0	0	0	0	0	0	0	0	0	0	5	1	3	1	1	4	1	1	4	1	1	1	1	1	1	0	0	0	0	0	0	0	0	0	3	1	0	0
AL139246.3	0	0	0	0	0	0	1	0	0	0	0	0	0	0	0	0	0	0	0	0	0	10	1	1	4	3	3	2	1	6	2	3	0	2	4	2	0	0	0	0	0	0	0	1	2	0	8	0	0
PRXL2B	5	28	13	8	25	10	41	42	1	38	9	16	28	33	0	13	21	25	23	245	2	56	70	100	229	265	263	176	157	124	315	271	147	144	33	200	0	36	6	5	9	11	60	52	25	24	51	33	45
MMEL1	0	7	0	0	10	0	13	16	0	0	0	1	3	5	0	15	20	0	1	4	0	3	0	1	12	8	0	5	2	3	1	19	14	9	3	2	1	2	46	12	1	18	1	2	0	0	1	1	1
MMEL1-AS1	0	0	0	0	0	0	0	0	0	0	0	0	0	0	0	0	0	0	0	0	0	0	0	1	0	0	0	0	0	0	0	0	0	0	1	0	0	0	0	0	0	0	0	0	0	0	0	0	0
TTC34	0	3	0	0	5	0	4	8	0	1	0	0	2	0	0	17	1	12	4	12	4	25	17	55	17	17	20	32	34	6	19	61	35	12	4	106	0	0	1	4	1	3	0	8	10	8	10	8	14
AC242022.2	0	0	0	0	0	0	0	0	0	0	0	0	0	0	0	0	0	0	0	0	0	0	0	1	0	0	0	0	0	1	0	0	0	0	2	0	0	0	2	0	0	0	0	1	0	0	0	0	1
AC242022.1	0	0	0	0	0	0	0	0	0	0	0	0	0	0	0	0	0	0	0	0	0	2	0	0	0	0	0	0	0	0	0	2	2	1	0	0	0	0	0	0	0	0	0	0	0	0	0	0	0
AL592464.2	0	0	0	0	0	0	0	0	0	0	0	0	0	0	0	0	0	0	0	0	0	0	0	0	0	0	0	0	0	0	0	0	0	0	0	0	0	0	0	0	0	0	0	0	0	0	0	0	0
AL592464.3	0	0	0	0	0	0	0	0	0	0	0	0	0	0	0	0	0	0	0	0	2	0	0	0	0	0	0	0	0	0	0	0	0	0	2	0	0	0	0	0	0	0	0	0	0	0	0	0	0
AL592464.1	0	0	0	0	0	0	0	0	0	0	0	0	0	0	0	0	0	0	0	0	0	0	0	0	0	0	0	1	0	0	0	0	0	1	0	0	0	0	0	0	0	0	0	0	0	0	0	0	0
AL589702.1	0	0	0	0	0	0	0	0	0	0	0	0	0	0	0	0	0	0	0	0	0	0	0	0	0	0	0	0	0	0	0	0	0	0	1	0	0	0	0	0	0	0	0	0	0	0	0	0	0
ACTRT2	0	0	0	0	0	0	0	2	0	0	0	0	0	0	0	0	0	0	0	0	0	0	0	0	0	0	0	0	0	0	0	0	0	0	0	0	0	0	0	8	0	11	0	0	0	0	0	0	0
PRDM16-DT	0	3	0	0	12	2	11	13	8	0	12	0	269	1	1	0	4	1	0	45	1	1	9	38	40	44	3	9	116	7	23	213	181	22	8	30	0	1	1	0	17	1	1	1	0	1	1	9	24
PRDM16	5	72	26	17	222	60	223	203	54	0	0	1	1094	13	0	6	21	32	18	211	8	7	35	71	121	174	16	28	508	20	78	590	557	144	77	56	479	119	738	57	1265	45	14	3	1	0	6	10	41
MIR4251	0	0	0	0	0	0	0	0	0	0	0	0	0	0	0	0	0	0	0	3	0	0	0	0	0	0	0	0	0	0	0	0	0	0	0	0	0	0	0	0	0	0	0	0	0	0	0	0	2
AL008733.1	0	0	0	0	0	0	0	0	0	0	0	0	0	0	0	0	0	0	0	0	0	0	0	0	0	0	0	0	0	0	0	1	0	0	0	0	0	0	0	0	0	0	0	0	0	0	0	0	0
AL512383.1	0	0	1	0	0	0	0	0	0	0	0	0	0	1	0	0	0	0	0	4	0	0	1	3	1	1	0	0	9	1	0	11	11	1	4	7	0	0	0	0	1	0	0	0	0	0	0	1	2
AL590438.1	0	0	0	0	0	0	0	0	0	0	0	0	0	0	0	0	0	0	0	16	0	0	3	12	6	4	5	0	6	0	40	4	1	0	13	30	0	0	0	0	0	0	0	9	0	0	1	5	1
AL354743.2	0	0	0	0	0	0	0	0	0	0	0	0	0	0	0	0	0	0	0	32	0	0	3	8	6	3	11	0	11	1	41	2	2	2	1	19	0	0	0	0	0	0	0	3	0	2	1	5	0
AL354743.1	0	0	0	0	0	0	0	0	0	0	0	0	0	0	0	0	0	0	0	9	0	0	0	0	1	2	0	1	2	2	2	6	1	3	8	0	0	0	0	0	0	0	0	0	0	0	1	0	0
ARHGEF16	6	272	48	88	703	87	177	461	169	17	82	43	206	245	4	23	196	200	7	272	3	1	204	157	229	241	641	169	466	209	380	211	223	242	41	465	88	198	806	57	113	41	201	24	24	24	39	58	20
AL512413.1	0	0	0	0	0	0	0	0	0	0	0	0	0	0	0	0	0	1	0	0	4	0	0	3	1	0	4	1	0	2	0	1	2	1	0	2	0	0	0	0	0	0	0	7	0	2	6	3	0
MEGF6	2	40	5	8	185	6	60	200	56	158	0	6	17	825	2	148	55	44	564	182	8	298	99	40	56	989	45	576	122	479	59	834	183	113	41	789	26	18	68	11	32	17	39	21	3	1	24	22	30
MIR551A	0	0	0	0	0	0	0	0	0	0	0	0	0	15	0	0	0	0	3	0	0	0	0	0	0	0	0	0	0	0	0	1	0	0	0	3	0	0	0	0	0	0	0	0	0	0	0	0	0
AL513320.1	0	0	0	0	0	0	0	0	0	0	0	0	0	2	0	0	0	0	0	4	0	5	3	5	4	1	4	2	2	1	3	1	2	0	0	3	0	0	0	0	0	0	0	0	2	1	0	1	1
TPRG1L	51	293	164	146	155	80	576	250	52	35	160	30	286	58	123	205	213	347	111	969	10	87	87	348	906	1463	1526	570	831	798	1726	983	524	576	197	559	28	225	129	22	155	50	541	252	240	255	158	325	201
WRAP73	30	130	117	33	37	20	191	119	101	98	26	26	186	71	0	188	208	248	278	179	2	66	53	106	129	188	290	188	219	240	237	172	136	135	44	249	15	56	29	34	37	54	174	48	52	41	92	83	29
TP73	10	8	0	0	3	18	83	1	0	147	1	5	6	158	0	7	2	95	47	0	0	2	0	0	4	6	8	4	5	13	3	7	17	1	11	4	1	0	0	16	0	18	2	0	1	0	0	2	5
AL136528.1	0	0	0	0	0	0	2	0	0	0	0	0	0	0	0	0	0	0	0	6	0	0	0	3	1	0	12	1	0	5	4	1	0	3	0	6	0	0	0	0	0	0	0	1	1	0	0	5	0
AL136528.2	0	0	0	0	0	0	0	0	0	0	0	0	0	0	0	0	0	0	0	0	0	0	0	0	0	0	0	0	0	0	0	0	1	0	0	0	0	0	0	0	0	0	0	0	0	0	0	0	0
TP73-AS1	35	263	31	173	309	8	351	492	121	73	1	6	228	79	133	383	213	462	99	347	7	83	145	179	366	311	469	99	398	318	452	491	346	252	74	411	8	86	17	9	73	41	59	101	111	78	150	168	81
AL136528.3	0	0	0	0	0	0	0	0	0	0	0	0	0	0	0	0	0	0	0	0	0	0	0	0	0	0	0	0	0	0	0	1	0	0	0	0	0	0	0	0	0	0	0	0	0	0	0	0	0
CCDC27	0	0	0	1	17	0	0	0	0	0	0	0	0	0	0	0	1	3	0	0	3	0	1	1	0	0	0	0	0	0	1	0	0	0	1	1	3	0	0	13	0	82	0	0	1	0	0	0	1
SMIM1	0	58	0	50	31	0	4	51	12	0	24	1	6	2	0	65	27	8	2	34	0	3	9	6	18	29	38	2	101	202	29	47	30	24	3	20	0	4	3	1	2	0	20	1	8	3	4	6	1
LRRC47	61	361	269	149	452	98	551	709	178	319	53	54	361	267	65	491	327	496	678	564	6	111	141	230	525	684	701	432	885	569	820	753	537	465	142	323	204	209	438	125	406	91	418	131	129	21	167	201	126
RN7SL574P	0	1	0	0	0	0	1	0	0	0	0	0	0	0	0	3	0	2	0	0	2	1	3	1	0	2	3	8	2	5	0	1	2	1	2	5	2	0	0	0	0	3	0	0	2	2	0	0	1
AL365330.1	0	0	0	0	0	0	0	1	0	0	0	0	0	0	0	1	2	1	0	6	0	0	0	1	2	0	6	1	4	8	3	4	5	2	3	2	0	0	2	0	0	0	0	1	4	1	3	1	0
CEP104	466	1230	430	534	1034	168	2763	873	370	377	874	253	1643	508	513	1451	1102	2501	1500	647	8	214	205	377	559	672	947	501	861	539	748	619	478	573	243	583	426	501	1081	106	1239	261	1026	280	261	222	322	307	154
DFFB	14	70	2	9	182	3	198	137	20	19	0	44	105	34	16	65	125	202	169	73	3	49	61	38	77	63	101	73	99	75	81	82	73	64	20	109	27	37	37	0	60	29	85	52	41	27	41	57	23
C1orf174	112	277	54	84	358	176	720	274	123	119	210	83	290	167	428	661	340	663	755	93	3	83	65	78	197	193	249	169	238	147	232	242	199	154	64	98	448	106	728	155	344	84	283	81	102	31	73	84	39
LINC01134	0	0	0	0	0	0	0	0	0	1	0	0	0	4	0	1	0	7	0	0	0	1	1	4	3	1	5	7	3	4	15	1	0	2	2	38	0	0	0	0	0	0	0	1	3	0	5	2	0
LINC01346	0	0	0	0	0	0	6	0	0	0	0	0	0	0	0	0	0	3	0	0	0	0	0	2	1	2	1	0	0	0	3	1	1	0	4	17	0	0	0	0	0	0	0	0	0	0	0	0	1
LINC01345	0	0	0	0	0	0	0	0	0	0	0	0	0	0	0	0	0	0	0	0	0	0	0	0	1	2	0	0	0	0	1	0	2	1	10	0	0	0	0	0	0	0	0	0	0	0	0	0	0
LINC02780	0	0	0	0	0	0	0	0	0	0	0	0	0	0	0	0	0	0	0	0	0	0	0	0	0	0	0	1	0	1	0	0	0	0	8	0	0	0	0	0	0	0	0	0	0	0	0	0	0
AL805961.1	0	0	0	0	0	0	1	0	0	0	0	0	0	1	0	0	0	0	0	0	3	0	0	0	0	0	0	0	0	1	0	0	0	3	10	1	0	0	0	0	0	0	0	0	1	0	0	0	1
EEF1DP6	0	0	0	0	0	0	0	1	0	0	0	0	0	0	0	0	0	0	0	0	1	0	0	0	0	0	0	0	0	0	0	1	0	3	2	0	0	0	0	2	0	1	0	0	0	0	1	0	0
LINC01777	0	0	0	0	0	0	0	0	0	0	0	0	0	0	0	0	0	0	0	0	0	0	0	0	0	0	0	0	0	0	0	0	0	0	5	1	0	0	0	0	0	0	0	0	0	0	0	0	0
AL355602.1	0	0	0	0	0	0	0	0	0	0	0	0	0	0	0	0	0	0	0	0	2	0	0	0	0	1	0	0	0	0	0	1	0	1	1	0	0	0	0	0	0	0	0	0	0	0	0	0	2
Z98747.1	0	0	0	0	0	0	0	0	0	0	0	0	0	0	0	0	0	0	0	0	1	0	0	0	0	0	0	0	0	0	0	0	0	0	0	0	0	0	0	0	0	4	0	0	0	0	0	0	0
LINC01646	0	0	0	0	0	0	0	0	0	0	0	0	0	0	0	0	0	0	0	0	1	0	0	0	0	0	0	0	0	0	0	0	0	1	4	0	0	0	0	0	0	0	0	0	0	0	0	0	0
AJAP1	65	21	2	0	0	9	99	44	0	46	47	0	1	220	0	4	1	80	0	97	5	6	32	46	81	145	34	91	19	193	27	46	29	75	75	10	11	59	18	10	1	41	80	74	10	21	296	73	19
Z98886.1	0	0	0	0	0	0	0	0	0	0	0	0	0	1	0	0	0	0	0	0	0	0	1	0	0	0	1	0	0	0	0	0	0	0	3	0	0	0	0	0	0	0	0	0	0	0	4	0	1
BX005132.1	0	0	0	0	0	0	0	0	0	0	0	0	0	0	0	0	0	0	0	0	2	0	0	0	0	0	0	0	0	0	0	0	0	0	0	0	0	0	0	0	0	0	0	0	0	0	0	0	0
LINC02781	0	0	0	0	0	0	0	0	0	0	0	0	0	0	0	0	0	0	0	0	0	0	0	0	0	0	0	0	0	0	0	0	0	0	6	0	0	0	0	0	0	0	0	0	0	0	0	0	0
LINC02782	0	0	0	0	0	0	0	0	0	0	0	1	0	0	0	0	0	0	0	0	0	0	1	1	0	1	2	8	0	1	0	0	0	1	2	0	0	0	0	0	0	0	0	0	0	0	2	0	0
AL139823.1	0	0	0	0	0	0	1	0	0	0	0	0	0	0	0	0	0	0	0	7	1	0	0	0	3	1	0	7	0	4	0	0	2	4	3	2	0	0	0	0	0	0	0	4	2	2	0	3	0
Z98259.3	0	0	1	0	0	0	0	0	0	0	0	1	0	0	0	0	0	0	0	4	0	0	0	0	2	0	0	10	0	24	0	0	0	0	3	0	0	0	0	0	0	0	0	0	0	0	2	3	0
Z98259.2	0	0	0	0	0	0	0	0	0	0	0	0	0	0	0	0	0	0	0	0	0	0	0	0	0	0	0	18	0	0	0	0	0	0	0	0	0	0	0	0	0	0	0	0	0	0	0	0	2
Z98259.1	0	0	0	0	0	0	0	0	0	0	0	0	0	0	0	0	0	0	0	0	0	0	0	0	0	0	1	1	0	0	1	0	0	0	3	0	0	0	0	0	0	0	0	0	0	0	0	0	0
Z97988.2	0	0	0	0	0	0	0	0	0	0	0	0	0	0	0	0	0	0	0	0	0	0	0	0	0	0	0	0	0	0	0	0	0	0	0	0	0	0	0	0	0	0	0	0	0	0	0	0	0
AL365255.1	0	0	0	0	0	0	0	0	0	0	0	0	0	0	0	0	0	0	0	0	0	1	0	0	1	0	1	18	0	8	0	1	0	3	6	1	0	0	0	0	0	0	0	0	0	0	7	3	0
Z97988.1	0	0	0	0	0	0	0	0	0	0	0	0	0	0	0	0	0	0	0	0	0	0	0	0	0	0	0	0	0	0	0	0	0	0	0	0	0	0	0	0	0	0	0	0	0	0	0	0	0
MIR4689	0	0	0	0	0	0	0	0	0	0	0	0	0	0	0	0	0	0	0	4	0	0	0	2	0	0	0	0	0	3	0	0	0	0	0	2	0	0	0	0	0	0	0	0	0	0	0	0	0
NPHP4	64	191	566	171	446	347	238	350	130	99	82	143	709	209	25	226	287	275	463	269	3	49	248	256	162	322	298	376	511	445	206	323	269	181	83	579	108	245	411	151	258	126	399	89	94	84	162	102	50
KCNAB2	16	170	173	127	205	119	308	206	199	127	189	50	314	86	60	109	129	442	335	330	14	806	176	79	48	249	149	535	57	299	150	155	58	169	141	284	41	132	114	45	517	49	119	37	54	28	126	59	32
CHD5	19	162	548	305	518	50	140	123	18	47	11	597	510	25	427	17	335	231	44	53	6	2	555	234	80	180	826	24	2	265	213	5	2	287	69	311	145	821	1893	5112	6065	254	181	141	46	36	22	36	12
AL031847.2	0	0	0	0	0	0	0	0	0	0	0	0	0	0	0	0	0	0	0	0	0	0	0	0	0	0	0	0	0	0	0	0	0	0	1	0	2	3	0	0	0	0	0	1	0	0	0	1	0
RPL22	9	18	3	0	0	29	43	4	1	0	597	10	65	7	1	57	34	42	115	795	20	168	83	240	1543	1391	1727	772	1408	1109	1684	1521	1235	976	317	302	14	355	28	328	11	283	856	535	455	250	577	726	487
AL031847.1	0	0	0	0	0	0	0	0	0	0	0	0	0	0	0	0	0	1	0	26	0	0	6	1	8	33	31	7	16	10	38	4	5	11	0	23	0	0	0	0	0	0	0	12	10	4	1	9	6
RNF207	6	125	6	7	237	40	92	59	27	5	148	82	164	39	0	153	85	89	123	176	5	40	401	86	131	168	351	327	161	160	110	95	115	204	32	715	201	70	302	11	1043	29	187	162	204	64	92	138	36
ICMT	79	285	108	52	181	60	267	199	32	121	15	38	292	153	47	399	207	162	234	1943	16	90	106	436	2155	1836	4070	1019	1639	1769	3298	1226	1020	1644	425	1033	0	105	7	18	17	53	329	857	612	383	453	1219	376
LINC00337	0	0	0	0	0	1	0	1	0	0	0	0	0	1	0	2	0	0	0	0	0	2	1	4	0	4	1	3	0	1	2	2	1	0	4	2	0	0	0	0	1	7	0	2	0	0	3	0	0
HES3	0	0	0	0	0	0	0	0	0	0	0	0	1	0	0	0	0	0	0	0	0	0	0	0	0	0	0	0	0	0	0	0	0	0	0	0	0	0	0	6	0	0	0	0	0	0	0	0	0
GPR153	2	20	0	0	13	3	53	28	2	2	5	94	63	101	41	4	18	26	30	104	3	27	29	66	67	222	124	193	10	91	70	119	28	71	25	52	3	1	4	0	1	1	18	14	5	27	26	22	10
ACOT7	192	165	0	75	56	176	105	166	30	156	1	91	230	199	42	70	120	147	934	610	5	44	128	212	468	503	1254	340	46	650	638	98	18	410	104	381	16	157	50	74	65	169	323	87	133	115	140	183	60
AL031848.2	0	0	0	0	0	0	1	0	0	0	0	0	0	0	0	0	0	0	0	5	0	3	3	3	8	4	9	9	5	6	3	4	2	6	0	6	0	0	0	0	0	0	0	4	3	2	2	2	0
HES2	0	0	0	0	0	0	0	3	0	1	0	10	3	40	0	0	0	0	1	20	2	0	5	2	6	4	35	2	2	26	1	3	0	4	4	3	1	0	0	10	0	6	0	3	12	1	11	117	6
ESPN	2	26	0	2	15	40	47	6	0	172	0	7	10	239	0	8	31	67	4	8	2	1	6	75	330	275	520	29	0	206	13	3	1	54	16	40	10	1	0	18	2	104	150	12	4	9	1	32	27
MIR4252	0	0	0	0	0	0	0	0	0	0	0	0	0	0	0	0	0	0	0	0	0	0	0	0	0	0	0	0	0	0	0	0	0	0	0	0	0	0	0	0	0	0	0	0	0	0	0	0	0
AL031848.1	0	0	0	0	0	0	0	0	0	0	0	0	0	0	0	0	0	0	0	0	0	0	2	2	2	1	1	0	0	0	0	1	0	0	0	3	0	0	0	6	0	0	0	0	0	0	0	0	0
TNFRSF25	9	30	16	5	42	18	147	111	69	346	0	71	50	275	0	45	86	558	77	210	4	312	467	350	254	207	701	436	16	415	191	42	13	267	59	1285	4	32	55	4	91	50	51	271	218	164	248	257	210
PLEKHG5	79	285	230	139	542	79	760	257	53	936	85	162	282	982	5	231	229	1580	342	974	15	62	1791	991	870	1195	3145	1155	172	1568	1139	174	97	1000	151	2840	406	325	5013	299	1987	333	381	327	247	246	314	480	151
NOL9	172	580	244	225	292	267	794	292	90	202	253	113	627	173	1384	906	403	604	1188	440	12	276	65	285	620	594	820	465	613	483	653	589	422	522	196	438	32	119	48	66	130	134	391	305	261	174	325	304	199
RNU6-731P	0	0	0	0	0	0	0	0	0	0	0	0	0	0	0	0	0	0	0	0	0	0	0	0	0	0	0	0	0	0	0	0	0	0	0	0	0	0	0	0	0	0	0	0	0	0	0	0	0
AL591866.1	0	0	0	0	0	0	0	0	0	0	0	0	0	0	0	0	0	0	0	0	0	0	0	0	0	0	0	0	0	0	0	0	0	0	1	1	0	0	0	0	0	0	0	0	0	0	0	0	0
TAS1R1	0	0	0	0	0	0	3	1	0	0	0	0	0	3	0	1	0	0	1	2	0	0	0	1	1	0	0	1	0	0	3	3	0	0	3	0	7	1	0	1	0	34	1	0	0	0	0	0	1
ZBTB48	38	480	42	199	1023	58	196	1164	264	67	0	68	297	120	35	175	406	147	333	131	2	114	112	182	202	214	293	190	335	176	203	259	178	136	57	351	64	179	194	37	190	64	500	54	60	43	36	80	25
KLHL21	4	73	4	48	64	30	37	88	61	23	5	16	36	30	0	57	86	24	73	454	2	94	113	395	390	702	657	413	1656	549	852	545	353	176	143	577	1	30	15	0	15	7	50	148	85	87	68	154	109
PHF13	37	254	72	125	216	53	154	241	48	43	1	23	276	138	18	230	180	119	220	332	1	37	40	121	191	312	345	228	471	279	233	254	142	186	114	129	17	44	58	31	58	38	190	53	61	45	95	66	90
THAP3	5	88	66	31	98	3	105	233	54	70	0	28	98	45	0	73	87	60	165	90	0	38	52	47	151	90	115	87	283	97	157	214	143	71	17	107	25	70	117	24	127	27	144	22	21	9	27	42	12
DNAJC11	155	797	201	325	1017	155	629	1585	352	392	355	300	868	1480	208	874	786	527	2086	380	6	175	226	206	400	436	601	382	640	347	467	504	337	366	119	362	1503	384	2060	210	1167	455	1002	133	164	82	236	194	55
LINC01672	0	0	0	0	0	0	0	0	0	0	0	0	0	0	0	0	0	0	0	0	0	0	0	0	0	0	0	0	2	0	1	2	2	0	1	0	0	0	0	0	0	0	0	0	0	0	0	0	0
AL591163.1	0	0	0	0	0	0	0	0	0	0	0	0	0	0	0	0	0	0	0	0	0	0	0	0	0	0	0	0	0	0	0	0	0	0	0	0	0	0	0	0	0	0	0	0	0	0	0	0	0
CAMTA1-DT	0	0	0	0	0	0	0	0	0	0	0	0	0	0	0	0	0	0	0	0	0	1	2	1	9	11	8	2	9	2	9	4	10	4	1	3	0	0	0	0	0	0	0	2	1	2	2	3	0
CAMTA1	352	1009	107	507	806	140	742	889	232	204	371	66	703	338	944	466	575	695	745	321	10	87	128	282	438	267	688	245	341	390	494	402	252	656	191	383	74	83	599	100	409	244	448	181	291	109	303	207	103
AL590128.1	0	0	0	0	0	0	1	0	0	0	0	0	0	0	0	0	0	0	0	0	0	0	0	0	0	0	0	0	0	0	0	1	0	0	0	0	0	0	0	0	0	0	0	0	0	0	0	0	0
AL512330.1	0	0	0	0	0	0	0	0	0	0	0	0	0	0	0	0	0	0	0	0	0	0	0	0	0	0	0	0	0	0	0	0	0	0	0	0	0	0	0	0	0	0	0	0	0	0	0	0	0
RNU1-8P	0	0	0	0	0	0	0	0	0	0	0	0	0	0	0	0	0	0	0	0	0	0	0	1	1	0	0	0	0	1	1	0	1	1	2	2	0	0	0	0	0	0	0	0	0	0	0	1	0
CAMTA1-IT1	0	0	0	0	0	0	0	0	0	0	0	0	0	0	0	0	0	0	0	0	1	0	0	2	0	0	2	0	0	1	0	1	0	3	0	2	0	0	0	0	0	0	0	1	0	0	0	0	0
CAMTA1-AS2	0	0	0	0	0	0	0	0	0	0	0	0	0	0	0	0	0	0	0	0	0	0	0	0	1	1	0	0	0	1	0	0	0	0	0	2	0	0	0	0	0	0	0	0	0	0	0	0	0
CAMTA1-AS1	0	0	0	0	0	0	0	0	0	0	0	0	0	0	0	0	0	0	0	0	0	0	0	0	0	0	1	0	0	0	0	1	0	0	0	0	0	0	0	0	0	0	0	0	1	0	0	0	0
AL359881.3	0	0	0	0	0	0	1	0	0	0	0	0	0	0	0	0	0	0	0	0	1	0	0	2	0	0	4	0	0	1	1	0	1	1	5	3	0	0	0	0	0	0	0	1	3	0	3	0	1
AL359881.2	0	0	0	0	0	0	0	0	0	0	0	0	0	0	0	0	0	1	0	2	0	0	1	2	2	1	1	0	0	2	2	0	0	1	2	1	0	0	0	0	0	0	0	1	1	1	1	3	1
AL359881.1	0	0	0	0	0	0	0	0	0	0	0	0	0	0	0	0	0	0	0	5	0	1	0	4	4	2	4	4	0	3	3	0	1	4	4	5	0	0	0	0	0	0	0	4	15	2	5	4	0
VAMP3	263	557	117	230	200	105	419	322	192	94	289	40	390	90	529	381	390	185	239	1075	24	95	104	340	1895	1470	2430	959	1061	1744	2135	2251	1070	1558	683	376	34	180	36	89	107	144	699	581	484	345	285	655	459
Z98884.2	1	0	0	0	0	0	0	0	0	0	0	0	0	0	0	2	0	0	0	2	0	4	1	4	7	2	9	9	3	7	3	6	3	1	4	8	0	0	0	0	0	0	0	9	19	10	16	6	12
PER3	2011	2829	467	864	2181	632	5029	3256	457	218	309	146	4264	458	1972	3258	1433	1370	477	1237	8	53	386	523	1118	1559	1136	847	1396	739	1872	1952	625	1611	70	1391	224	459	2749	346	2477	906	1736	1142	537	582	668	352	898
Z98884.1	0	1	0	3	0	0	2	1	0	0	0	0	1	0	0	0	8	2	0	0	1	0	1	0	0	0	0	0	0	0	0	0	0	1	2	2	1	0	1	0	0	1	0	0	4	0	0	0	0
UTS2	0	0	0	2	0	0	6	10	0	0	0	0	11	1	0	0	0	4	8	2	3	5	1	3	14	4	20	2	0	5	1	1	1	0	3	0	1	0	0	25	0	41	4	24	0	1	0	64	0
TNFRSF9	18	5	0	0	7	0	12	8	0	43	0	11	8	15	0	8	0	19	29	23	3	135	13	3	4	44	4	64	2	18	5	5	2	7	22	7	0	1	3	16	0	33	0	0	4	1	5	1	6
AL009183.1	0	0	0	0	0	0	0	0	0	0	0	0	0	0	0	0	0	0	0	0	0	0	1	0	0	0	0	0	0	1	0	0	0	0	2	0	0	0	0	0	0	0	0	0	0	0	0	0	0
PARK7	854	3853	1554	1994	1964	816	5164	1792	695	1117	4070	1233	4986	1347	1534	6932	2290	2542	7288	1053	14	118	69	253	1429	1116	2299	654	2209	1105	1946	1371	1106	1045	323	369	176	3431	459	871	728	1522	15536	396	404	273	394	750	123
AL034417.1	0	0	0	0	0	0	0	0	0	0	0	0	0	0	0	0	0	0	0	0	0	0	0	1	0	0	0	0	0	0	0	0	0	0	0	0	0	0	0	0	0	0	0	0	0	0	0	0	0
AL034417.5	0	0	0	0	0	0	1	0	2	0	0	0	0	1	0	4	0	0	0	2	2	21	3	4	4	3	3	7	3	4	1	5	6	4	2	14	0	0	0	0	0	1	0	5	6	1	1	8	3
AL034417.4	0	1	0	1	0	0	0	0	10	0	0	0	6	0	0	0	0	0	2	4	1	1	2	29	0	1	4	2	0	5	0	5	1	2	4	8	0	0	0	0	0	0	0	0	4	7	4	7	3
ERRFI1	3506	11051	2305	4585	1744	3275	1413	1572	4968	120	4942	272	27274	206	408	709	9480	334	1128	1505	17	21	98	4902	2320	2276	8389	1144	1962	3603	1149	813	531	4112	2720	930	2214	231	962	122	719	319	1652	463	719	528	347	1629	427
AL034417.3	3	0	0	0	0	0	0	1	0	0	2	0	2	2	1	1	1	0	1	21	0	1	5	14	16	21	11	10	21	10	12	5	15	21	17	28	0	0	0	0	0	1	3	2	3	1	0	7	9
AL034417.2	0	0	0	0	0	0	0	0	0	0	0	0	0	0	0	0	0	0	0	0	0	1	0	3	1	0	1	0	3	1	1	2	2	4	2	1	0	0	0	0	0	3	0	0	0	0	0	0	0
AL358876.1	0	1	0	0	0	0	0	0	0	0	0	0	0	0	0	0	0	0	0	0	1	0	0	0	0	0	0	0	0	2	1	0	0	0	1	1	0	0	0	0	0	0	0	0	1	0	0	0	0
LINC01714	0	0	0	0	0	0	0	0	0	0	0	0	0	0	0	0	0	0	0	9	0	0	0	5	6	1	11	3	2	3	5	0	0	4	1	2	0	0	0	0	0	0	0	3	2	1	0	7	1
RNU1-7P	0	0	0	0	0	0	0	0	0	0	0	0	0	0	0	0	0	0	0	0	0	0	1	0	0	0	0	0	0	0	0	0	0	0	0	0	0	0	0	0	0	0	0	0	0	0	0	0	0
AL358876.2	0	0	0	0	0	0	0	0	0	0	0	0	0	0	0	0	0	0	0	0	0	0	0	0	0	0	0	0	0	0	0	0	0	0	0	0	0	0	0	0	0	0	0	0	0	0	0	0	2
RNU6-991P	0	0	0	0	0	0	0	0	0	0	0	0	0	0	0	0	0	0	0	0	0	0	0	0	0	0	0	0	0	0	0	0	0	0	0	0	0	0	0	0	0	0	0	0	0	0	0	0	0
SLC45A1	38	253	1	126	182	65	53	240	167	0	58	4	228	10	60	30	171	64	19	96	0	10	19	60	63	62	186	64	18	93	124	15	5	35	12	78	8	60	49	12	77	18	141	6	11	3	1	18	2
AL356072.1	0	0	0	0	0	0	0	0	0	0	0	0	0	0	0	0	0	0	0	4	0	0	0	0	0	0	4	0	0	0	1	0	0	0	0	0	0	0	0	0	0	0	0	0	1	1	0	0	0
RERE	1002	3082	635	989	2658	469	4326	3224	679	1342	1204	663	4747	1619	1246	4343	3264	3318	4551	2009	32	615	826	1212	1346	2273	1767	1624	1661	1567	1664	2582	1476	1821	564	1797	3136	1538	8102	1849	4921	877	4565	585	681	397	1571	622	657
RERE-AS1	0	0	0	0	0	0	0	0	0	0	0	0	0	0	0	0	0	1	0	0	0	7	1	2	1	1	0	3	0	0	4	0	0	1	0	3	0	0	0	0	0	0	0	3	2	2	0	3	0
AL096855.1	0	0	0	0	0	0	0	0	0	0	0	0	0	1	0	1	0	1	0	4	0	1	0	2	1	0	0	0	0	5	0	2	1	1	2	5	0	0	0	0	0	0	0	3	2	2	4	1	0
AL096855.2	0	0	0	0	0	0	0	0	0	0	0	0	0	0	0	0	0	0	0	0	0	0	0	0	0	0	0	0	0	0	0	0	0	0	0	0	0	0	0	0	0	0	0	0	0	0	0	0	0
RPL7P11	2	0	0	0	0	0	1	0	0	0	21	1	2	0	2	2	2	1	0	0	1	1	0	1	1	1	0	0	2	2	2	0	0	3	0	0	1	0	0	1	0	7	0	0	0	0	1	0	0
RPL7P7	31	79	0	69	70	19	84	199	109	5	287	25	112	23	0	103	78	68	125	12	2	11	13	15	5	3	8	17	6	18	0	11	8	11	7	41	7	2	2	6	23	26	25	27	34	14	61	26	14
AL357552.1	0	0	0	0	0	0	2	0	0	0	0	0	0	0	0	0	0	0	0	0	0	7	0	2	4	0	0	1	2	0	0	6	0	4	3	0	0	0	0	0	0	0	0	12	12	5	18	5	11
AL357552.2	0	0	0	0	0	0	0	0	0	0	0	0	0	0	0	0	0	0	0	0	0	0	0	0	0	0	0	0	0	0	0	0	0	0	4	0	0	0	0	0	0	0	0	0	0	0	0	0	0
AL357552.3	0	0	0	0	0	0	2	3	0	0	2	1	0	4	0	2	0	1	1	12	5	5	2	7	3	3	12	8	0	9	1	5	2	4	5	16	0	0	0	0	0	0	0	14	17	11	47	13	17
RPL23AP19	0	0	0	0	0	0	1	0	0	0	0	0	0	0	0	1	0	0	0	0	0	0	0	0	0	1	0	0	0	0	0	1	0	1	6	0	3	0	0	5	0	8	0	0	0	0	0	0	0
ENO1	746	3516	482	1023	1051	1481	3318	1236	595	5588	3115	3483	4306	2336	1457	7995	2090	2486	19792	3198	52	800	236	669	2926	3637	4575	3483	7170	5714	3733	3546	3468	2811	1636	1056	173	1396	925	822	1496	863	6991	836	834	753	1773	2405	200
MIR6728	0	0	0	0	0	0	0	0	0	0	0	0	0	0	0	0	0	0	1	0	0	0	0	0	0	0	0	0	0	1	0	0	1	0	0	0	0	0	0	0	0	0	0	0	0	0	0	1	0
ENO1-AS1	0	0	0	0	0	0	0	0	0	0	0	0	0	0	0	0	0	0	0	2	0	0	0	1	4	3	2	2	9	2	6	3	6	2	0	1	0	0	0	0	0	0	0	0	0	1	1	2	0
RNU6-304P	0	0	0	0	0	0	0	0	0	0	0	0	0	0	0	0	0	0	0	0	0	0	0	0	0	0	0	0	0	0	0	0	0	0	0	0	0	0	0	0	0	0	0	0	0	0	0	0	0
HMGN2P17	1	1	0	0	0	0	0	0	0	0	0	0	2	0	0	0	0	1	0	0	0	1	0	0	3	3	3	2	0	2	0	2	2	2	3	2	1	1	0	0	0	32	0	0	0	0	0	0	0
AL139415.1	0	0	0	0	0	0	0	0	0	0	0	0	0	0	0	0	0	0	0	0	0	7	0	0	0	0	0	1	0	0	0	0	0	0	1	0	0	0	0	0	0	0	0	0	0	0	0	0	0
AL139415.2	0	0	0	0	0	0	0	0	0	0	0	0	0	0	0	0	0	0	0	0	0	0	0	0	0	0	0	0	0	0	1	0	0	0	0	0	0	0	0	0	0	0	0	0	0	0	0	0	0
CA6	0	0	0	0	0	1	30	0	0	0	56	0	0	18	0	0	0	18	0	2	1	0	0	7	0	4	3	1	0	220	4	1	0	3	18	0	6	0	1	12	0	56	0	0	3	0	12	10	2
RN7SL451P	0	0	0	0	0	0	0	0	0	0	0	0	0	0	0	0	0	0	0	0	3	2	7	4	12	9	14	10	3	36	14	18	9	15	7	9	0	0	0	0	0	0	0	0	0	0	0	0	0
SLC2A7	0	34	0	0	0	0	1	1	0	0	2	0	0	7	0	0	15	7	0	5	0	0	2	0	2	0	0	0	0	7	0	2	2	0	2	0	8	0	0	11	1	33	0	0	0	1	0	0	0
SLC2A5	2	101	0	8	82	0	11	38	67	23	15	143	2	22	0	16	160	10	43	70	6	23	10	4	17	3	32	45	1	24	115	12	3	5	14	2	2	1	4	64	0	49	9	11	6	13	9	5	0
AL158048.1	0	0	0	0	0	0	0	0	0	0	0	1	0	0	0	0	0	0	0	0	0	0	0	0	0	0	0	0	0	0	0	0	0	0	1	0	0	0	0	3	0	3	0	0	0	0	0	0	0
GPR157	0	24	12	40	113	2	28	118	24	5	19	12	5	62	0	4	35	17	38	68	3	122	8	19	117	107	27	123	390	53	40	138	90	38	11	25	7	12	4	11	1	5	21	2	9	3	23	28	15
MIR34AHG	0	2	2	0	6	5	7	8	20	1	1	1	6	20	0	1	1	11	3	69	68	47	195	39	38	37	66	142	69	84	48	41	44	15	44	91	1	5	3	0	6	0	3	40	73	38	105	89	38
MIR34A	0	0	0	0	0	0	0	0	0	0	0	0	0	0	0	0	0	0	0	0	0	0	0	0	0	0	0	0	0	0	0	0	0	0	0	0	0	0	0	0	0	0	0	0	0	0	0	0	0
LNCTAM34A	0	1	0	0	0	2	2	3	0	0	0	0	0	0	0	1	0	0	0	8	1	7	5	6	16	19	13	7	29	25	10	8	9	5	2	8	0	0	0	1	0	0	1	3	8	11	13	11	4
H6PD	206	1441	290	727	1262	320	1061	1649	248	481	208	363	1031	534	41	3186	1181	679	682	1357	15	498	195	459	634	2282	872	1157	1994	1118	875	2156	1332	736	204	724	94	364	234	75	247	207	547	143	221	147	192	272	178
SPSB1	28	229	0	17	60	0	57	61	23	38	12	1	22	37	91	51	168	39	48	663	2	43	46	168	169	517	302	272	395	582	198	389	162	490	269	60	14	3	7	4	9	15	49	8	25	9	85	58	36
BX323043.1	0	0	0	0	0	0	0	0	0	0	0	0	0	0	0	0	0	0	0	0	1	0	0	3	1	3	2	6	2	1	4	9	3	5	7	0	0	0	0	0	0	0	0	1	0	0	0	2	1
LINC02606	0	0	0	0	0	0	0	0	0	0	0	0	0	0	0	0	0	0	0	12	1	3	3	3	5	16	13	13	16	2	19	43	24	14	1	7	0	0	0	0	0	1	0	3	0	1	0	5	1
RNA5SP40	0	0	0	0	0	0	0	0	0	0	0	0	0	0	0	0	0	0	0	0	0	0	0	0	0	0	0	0	0	0	0	0	0	0	0	0	0	0	0	0	0	0	0	0	0	0	0	1	0
AL928921.1	0	0	0	0	0	0	0	0	1	0	0	0	0	0	0	0	0	0	0	0	0	0	0	1	0	0	0	0	0	0	0	0	0	1	1	0	0	0	0	0	0	0	0	0	0	0	0	0	0
SLC25A33	32	122	33	106	181	58	176	102	84	50	123	21	278	19	107	316	76	93	261	82	3	5	3	18	72	74	177	65	127	121	99	78	56	93	27	26	2	24	1	47	3	51	188	49	66	12	164	91	42
AL954705.1	17	87	5	75	22	48	28	48	55	0	47	11	108	5	0	100	27	38	91	4	0	2	1	4	2	5	0	6	5	5	0	8	3	2	4	13	7	0	0	13	0	24	13	6	5	0	17	5	11
TMEM201	11	62	7	46	126	45	51	133	49	22	35	27	307	47	11	61	90	37	77	202	3	50	117	113	91	199	171	167	170	195	170	131	86	139	38	237	2	27	35	13	26	32	75	19	37	27	68	29	53
PIK3CD	26	271	0	104	618	71	502	566	592	471	305	102	232	162	141	216	461	726	576	151	9	1014	167	50	51	307	105	278	37	117	141	277	106	128	72	137	98	67	583	62	121	142	288	13	32	6	27	27	20
PIK3CD-AS1	0	0	0	0	0	0	5	0	0	0	0	0	0	0	0	0	0	0	0	0	0	1	0	0	0	2	0	1	0	0	1	2	0	1	0	0	1	0	0	0	1	37	1	0	0	0	0	1	0
AL691449.1	0	0	0	0	0	0	0	0	0	0	0	0	0	0	0	0	0	0	0	0	0	0	0	0	0	0	0	0	0	0	0	2	0	0	5	0	0	0	0	0	0	0	0	0	0	0	0	0	1
PIK3CD-AS2	0	0	0	0	0	0	1	0	0	0	0	0	0	0	0	0	0	0	0	19	1	0	4	5	51	18	47	2	33	8	57	33	26	41	6	14	0	0	0	0	0	0	0	2	3	1	1	7	3
CLSTN1	1075	2845	975	1948	2337	753	2538	2894	1287	1218	1532	411	4864	1167	781	2653	2622	1949	3209	3693	14	370	476	1567	2695	3826	4512	1681	2134	2603	7152	2836	2239	2300	608	2209	500	3405	1970	1733	2537	1041	5683	559	545	495	736	921	364
MZT1P1	0	0	0	0	0	0	0	0	0	0	0	0	0	0	0	0	0	0	0	0	0	0	0	0	0	0	0	0	0	0	0	0	0	0	0	0	0	0	2	1	0	0	0	0	0	0	0	0	0
AL357140.3	0	0	0	0	0	0	0	0	0	0	0	0	0	0	0	1	0	0	0	0	1	0	1	4	0	0	2	2	0	2	0	2	0	0	0	9	0	0	0	0	0	0	0	0	1	4	7	0	1
CTNNBIP1	17	29	3	16	46	5	49	35	1	11	14	9	81	43	2	54	27	53	46	441	4	21	100	177	456	484	668	213	1041	447	852	508	352	299	52	449	71	44	114	10	100	11	93	112	105	74	138	142	96
AL357140.1	0	0	0	0	0	0	0	0	0	0	0	0	0	0	0	0	0	0	0	0	0	0	0	0	0	0	0	0	0	0	0	0	0	0	0	0	0	0	0	0	0	1	0	0	0	0	0	0	0
AL357140.4	0	0	0	0	0	0	0	0	0	0	0	0	0	0	0	0	0	0	0	0	0	0	0	1	2	0	2	0	0	0	3	1	2	2	1	2	0	0	0	0	0	0	0	2	1	2	0	2	0
LZIC	199	464	151	345	258	57	736	254	98	80	747	105	587	135	722	847	485	377	695	626	19	164	116	307	951	753	1130	573	572	628	1055	873	713	747	240	326	42	62	116	58	207	86	282	396	284	195	325	295	300
AL357140.2	0	0	1	0	0	0	0	0	0	0	0	0	0	0	0	0	1	0	0	0	0	1	0	0	6	2	9	4	6	2	5	7	2	4	1	5	0	0	0	0	0	0	0	2	1	3	2	1	1
NMNAT1	12	64	0	35	11	1	88	57	5	4	94	32	79	28	59	65	46	44	41	100	8	32	26	71	210	151	222	116	379	104	208	300	248	141	42	87	3	33	18	0	28	32	108	74	69	35	60	87	39
RN7SKP269	0	0	0	0	0	0	0	0	0	0	0	0	0	0	0	0	0	0	1	0	0	0	1	5	3	3	5	8	18	16	8	13	8	6	2	8	0	0	0	0	0	0	0	0	4	0	0	1	3
TMEM274P	0	0	0	0	0	0	0	0	0	0	0	0	0	0	0	0	0	0	0	0	1	0	0	1	0	0	0	0	0	0	0	0	1	0	1	0	0	0	0	1	0	0	0	0	0	0	0	0	0
MIR5697	0	0	0	0	0	0	0	0	0	0	0	0	0	0	0	0	0	0	0	2	1	0	0	1	0	0	1	0	0	0	0	1	0	0	0	1	0	0	0	0	0	0	0	1	1	2	2	0	2
AL603962.1	0	0	0	0	0	0	0	0	0	0	0	0	0	0	0	0	0	0	0	0	0	0	0	0	0	0	0	0	0	0	0	0	0	0	0	0	0	0	0	0	0	0	0	0	0	0	0	0	0
RBP7	60	47	81	50	11	0	37	3	1	11	2	0	200	3	0	44	19	10	81	52	2	1	10	9	44	51	19	69	377	35	31	225	203	71	25	7	12	3	43	16	23	44	40	4	2	1	4	6	9
UBE4B	1120	3460	762	928	1874	1015	4120	2754	390	466	3123	448	4141	750	1404	3396	2817	2693	3808	890	15	295	233	612	1050	1089	1762	819	1528	762	1446	1232	1204	1102	251	954	472	1032	652	294	1233	634	2134	428	454	282	636	440	291
AL590639.1	0	0	0	0	1	0	0	0	0	0	1	0	0	0	0	0	0	0	0	0	3	0	0	0	0	0	0	0	0	0	0	0	0	0	2	0	0	0	0	1	0	0	0	0	0	0	0	0	0
PGAM1P11	0	0	0	0	0	0	1	0	0	0	0	1	0	0	0	2	0	1	0	0	0	2	3	4	1	2	6	5	0	2	0	2	1	1	7	8	0	0	0	0	0	0	0	0	7	5	1	2	1
RNU6-828P	0	0	0	0	0	0	0	0	0	0	0	0	0	0	0	1	0	0	0	0	0	2	0	0	0	0	0	1	0	1	1	1	0	3	0	2	0	0	0	0	0	0	0	1	2	2	5	0	1
KIF1B	3149	8490	2334	3091	5192	1883	8219	6368	2826	2535	5895	1633	10524	2104	3596	15600	7176	5060	14109	2392	26	188	500	1195	1925	2099	3433	1967	2070	2436	2292	1915	1427	2454	1195	1791	1626	2785	3272	510	3284	2199	8277	1124	1519	883	3752	1672	640
AL358013.1	0	0	0	0	0	0	0	0	0	0	0	0	0	0	0	1	0	0	0	0	0	0	3	1	0	1	1	1	1	0	0	0	0	0	0	2	0	0	0	0	0	0	0	1	2	0	1	1	0
RNU6-37P	0	0	0	1	0	0	0	0	0	0	0	0	0	0	0	1	0	0	0	14	0	0	0	5	5	2	3	1	0	3	0	1	2	8	0	6	0	0	0	0	0	0	0	7	9	0	18	4	2
RN7SL731P	0	0	0	0	0	0	0	0	0	0	0	0	0	0	0	0	0	0	0	0	0	0	0	0	0	0	0	0	0	0	0	0	0	0	0	0	0	0	0	0	0	0	0	0	0	0	0	0	0
AL139424.3	0	0	0	0	0	0	0	0	0	0	0	0	0	0	0	1	0	0	0	0	0	0	1	2	0	0	2	2	0	2	0	1	2	0	4	1	0	0	0	0	0	0	0	0	0	1	1	2	2
AL139424.2	0	0	0	0	1	0	0	1	1	1	0	0	0	1	0	6	0	1	3	6	1	4	2	11	2	11	14	8	2	17	5	5	11	13	2	22	0	0	0	0	0	0	0	11	13	5	37	24	6
PGD	183	615	326	212	214	245	729	355	266	616	925	265	700	415	186	1378	425	555	2114	617	6	59	82	188	749	627	895	652	1408	527	832	1278	1157	803	259	254	46	552	302	154	252	286	2472	239	220	143	355	472	134
AL139424.1	0	0	0	0	0	0	0	0	0	0	0	0	0	0	0	0	0	0	0	0	0	0	0	0	0	0	1	0	0	0	0	0	0	0	1	0	0	0	0	0	0	0	0	0	0	0	0	1	0
CENPS-CORT	0	0	0	0	0	0	0	0	0	0	0	0	0	0	0	0	0	0	0	0	0	0	0	0	0	0	0	0	0	0	0	0	0	1	1	0	0	0	0	0	0	0	0	0	0	0	0	0	0
CENPS	0	0	3	0	0	2	0	0	0	0	0	0	0	0	0	1	0	0	0	0	0	0	1	6	35	23	76	12	20	24	43	18	18	21	2	6	0	2	0	0	0	0	2	16	12	7	12	10	5
CORT	0	1	0	0	0	0	0	0	0	0	0	0	1	0	0	0	0	1	0	1	0	1	0	2	3	2	5	1	0	0	0	1	1	0	1	4	0	0	0	0	1	0	0	0	0	0	2	1	0
DFFA	62	163	127	79	92	123	207	165	60	81	197	88	168	147	304	397	190	138	534	620	20	123	105	268	808	692	1019	594	777	587	859	765	702	585	226	360	69	85	183	33	116	43	406	207	217	132	265	305	138
AL354956.1	0	0	0	0	0	0	0	0	0	0	0	1	0	1	0	0	0	0	0	0	0	0	0	0	0	0	0	0	0	0	0	0	0	0	1	0	0	0	0	0	0	0	0	0	0	0	0	0	0
PEX14	82	574	173	223	794	248	332	733	66	155	158	131	521	393	184	599	554	217	620	184	2	64	64	90	173	194	251	128	243	185	229	209	146	166	39	138	270	625	1060	151	772	146	1307	34	37	43	36	46	20
AL139423.2	0	0	0	0	0	0	0	0	0	0	0	0	0	0	0	0	0	0	0	0	0	0	0	0	0	0	0	1	0	0	0	1	1	0	2	0	0	0	0	0	0	0	0	0	0	0	0	0	1
RN7SL614P	0	0	0	0	0	0	0	0	0	0	0	0	0	0	0	0	0	0	0	0	0	2	2	2	2	0	0	8	1	7	0	3	0	1	0	1	0	0	0	0	0	0	0	0	0	0	0	1	0
CASZ1	63	1482	147	453	1991	569	1028	2398	1904	432	480	42	3152	551	445	284	1812	1303	575	479	3	81	392	396	264	473	835	521	176	235	500	316	209	530	86	556	297	16	1464	228	1415	119	639	149	107	221	62	75	66
AL139423.1	0	3	0	4	1	1	4	20	4	0	0	1	3	3	0	2	6	0	2	6	2	0	2	0	1	5	1	4	0	0	1	2	2	2	0	0	0	0	0	8	4	20	2	0	0	1	1	0	1
HSPE1P24	0	0	0	0	0	0	0	0	0	0	0	0	0	0	0	0	0	0	0	0	0	0	0	0	0	0	0	0	0	0	0	0	0	0	3	0	0	0	0	0	0	0	0	0	0	0	0	0	0
C1orf127	0	151	0	5	334	26	96	1041	69	8	0	0	78	19	44	1	261	134	0	58	1	2	12	13	7	2	74	1	2	11	74	4	0	25	9	77	7	9	646	11	135	28	146	37	12	37	1	6	1
CFL1P6	0	0	0	0	0	0	0	0	0	0	0	0	0	1	0	0	0	0	0	0	0	0	2	2	0	1	2	1	0	0	2	0	0	1	0	0	0	0	0	0	0	0	0	0	0	0	0	0	0
TARDBP	200	724	128	221	204	221	659	220	127	181	446	75	801	119	499	1145	470	787	980	415	4	241	27	281	590	409	759	360	382	490	581	661	472	630	250	291	19	98	15	45	10	113	689	435	307	264	425	334	281
AL109811.3	0	0	0	0	0	0	0	0	0	0	0	0	0	0	0	0	0	0	0	0	0	0	0	0	0	0	0	0	0	0	0	0	0	0	0	0	0	0	0	0	0	0	0	1	0	0	0	0	0
MASP2	3	0	0	86	0	3	3	2	0	18	46	0	0	0	0	1	2	0	0	0	0	1	0	0	0	0	2	0	0	1	0	0	0	0	3	1	2	1	0	25	1	21	0	0	0	0	2	0	2
AL109811.2	3	8	0	0	0	0	24	2	50	0	0	1	28	0	0	12	7	10	5	6	2	8	1	21	16	10	17	12	6	16	19	22	16	15	3	25	0	0	0	3	0	3	10	36	22	12	27	27	8
SRM	21	73	156	20	70	8	193	87	60	119	86	65	79	91	3	183	62	160	521	222	4	50	70	71	99	253	325	207	178	236	155	227	62	135	62	119	14	92	27	3	26	26	99	19	23	12	35	39	19
EXOSC10	267	952	255	295	669	276	1403	653	337	226	328	235	1220	334	736	1461	940	1231	2114	639	9	321	403	464	682	576	1037	659	683	704	628	693	552	724	236	817	603	243	1783	442	1140	274	1434	453	379	200	492	426	126
AL109811.1	3	9	0	0	0	3	7	14	0	2	0	2	4	13	0	8	4	17	22	2	0	6	0	7	2	0	1	7	4	1	2	2	7	2	4	8	0	0	0	0	0	8	2	2	1	3	4	1	0
EXOSC10-AS1	0	0	0	0	0	0	0	0	0	0	0	2	0	1	0	0	0	0	0	6	0	0	0	0	3	1	7	0	3	3	4	1	1	0	0	3	0	0	0	0	0	0	1	1	1	0	0	1	0
MTOR	545	2409	530	863	1359	698	2366	1917	844	1167	792	526	2888	1152	893	3780	2304	2122	3891	2096	18	580	587	1022	1557	1419	3760	1631	1872	1692	1404	1308	1058	1711	466	1826	218	601	949	270	1514	663	1889	1100	1014	591	946	1275	341
MTOR-AS1	0	0	0	0	0	0	1	0	0	0	0	0	0	0	0	0	0	0	0	0	1	0	0	1	1	0	2	0	0	4	1	0	0	0	0	0	0	0	0	0	0	2	0	0	1	1	1	0	1
RNU6-537P	0	0	0	0	0	0	0	0	0	0	0	0	0	0	0	0	0	0	0	0	0	0	0	0	0	0	0	0	0	0	0	0	0	0	0	0	0	0	0	0	0	0	0	0	0	0	0	0	0
ANGPTL7	0	7	0	0	66	0	16	2	0	0	0	0	0	0	0	1	5	2	11	4	0	0	0	1	3	2	0	7	0	22	1	57	1	2	6	2	4	0	0	12	3	47	0	1	0	0	0	4	1
RNU6-291P	0	0	0	0	0	0	0	0	0	0	0	0	0	0	0	0	0	0	0	0	0	0	0	0	0	0	0	0	0	0	0	0	0	0	0	0	0	0	0	0	0	0	0	0	0	0	0	0	0
RPL39P6	0	0	0	0	0	0	1	0	0	0	0	0	1	0	0	1	0	0	0	0	0	0	0	0	0	1	0	0	0	0	0	0	0	0	0	0	1	0	0	0	0	10	0	0	0	0	0	0	0
UBIAD1	255	633	937	595	142	369	678	271	99	97	167	82	694	135	367	529	434	342	528	318	3	87	27	115	273	280	449	158	267	300	387	204	214	221	61	189	10	322	67	24	121	167	884	79	89	51	94	95	79
UBE2V2P3	0	0	0	0	0	0	0	0	0	0	0	0	0	0	0	0	0	0	0	0	0	0	0	0	0	0	0	0	0	0	0	1	0	1	1	0	0	0	0	0	0	9	0	0	0	0	1	0	0
AL031291.1	0	0	0	0	0	0	0	0	0	0	0	0	0	0	0	0	0	0	0	0	0	0	0	0	0	0	0	0	0	0	0	1	0	0	1	0	0	0	0	0	0	0	0	1	0	0	0	0	0
MTCYBP45	0	0	0	0	0	0	0	0	0	0	0	0	0	0	0	0	0	0	0	0	0	0	0	0	0	0	0	0	0	0	0	0	0	0	1	0	0	0	0	0	0	0	0	0	0	0	0	0	0
DISP3	63	728	0	166	1646	332	45	1174	538	19	11	0	23	497	279	3	950	39	490	193	2	5	28	79	50	59	198	35	4	196	95	1	2	72	14	207	6	3	27	30	65	86	18	39	18	14	33	54	9
AL590989.1	4	1	0	9	0	10	0	0	0	0	0	0	0	6	0	0	3	0	2	0	0	0	0	2	0	0	3	0	0	0	0	0	0	2	0	0	0	0	0	7	0	5	0	0	0	0	0	0	0
LINC01647	0	0	0	0	0	0	0	0	0	0	0	0	0	0	0	0	0	0	0	0	1	0	0	0	0	0	0	0	0	0	0	0	0	0	4	1	0	0	0	0	0	0	0	0	0	0	0	0	0
AL031731.1	0	0	0	0	0	0	0	1	0	0	0	0	0	0	0	0	0	0	0	0	0	0	0	0	0	0	0	2	0	0	0	0	0	0	0	0	0	0	0	0	0	0	0	0	0	0	0	0	0
FBXO2	24	127	60	230	217	48	70	222	83	1	0	7	68	32	18	164	98	19	4	142	2	7	36	91	310	158	430	133	124	279	606	58	44	93	24	222	156	45	174	11	557	19	109	51	26	11	14	62	11
FBXO44	34	100	53	61	416	6	108	459	184	53	12	48	153	63	0	102	122	65	95	241	3	112	213	180	311	282	547	273	547	302	408	314	248	247	55	390	364	69	1175	47	493	63	251	66	87	47	64	152	38
FBXO6	9	47	46	53	51	7	46	10	6	39	2	14	30	12	0	57	24	27	31	30	0	19	3	10	57	67	27	58	111	40	53	69	49	35	9	16	0	31	6	10	5	28	90	3	10	7	2	5	2
MAD2L2	17	96	18	45	128	33	130	109	17	189	1	24	151	322	0	144	66	104	276	123	0	27	41	28	106	159	184	106	115	161	161	135	45	88	36	49	16	32	30	19	45	31	238	12	19	15	12	28	12
DRAXIN	0	0	0	1	0	0	1	2	0	19	0	0	0	27	0	0	0	1	4	12	1	5	5	3	0	7	0	4	2	5	0	2	2	5	6	3	0	2	0	9	0	19	0	4	0	1	0	0	1
AGTRAP	16	69	5	10	36	20	45	40	11	39	35	23	29	62	1	115	80	19	70	147	2	29	14	44	109	175	182	77	330	147	112	251	181	87	23	58	2	186	9	14	21	23	112	8	10	12	14	26	8
C1orf167	0	3	0	6	0	0	1	3	0	0	0	0	1	0	0	1	0	0	2	0	8	1	5	1	4	17	5	6	4	8	2	13	10	7	5	3	1	0	9	30	0	33	1	0	0	0	1	0	1
C1orf167-AS1	0	0	0	0	0	0	0	0	0	2	0	0	0	2	0	0	0	0	0	0	0	0	1	0	0	0	0	0	0	0	0	0	0	0	4	0	0	0	0	0	0	0	0	0	0	0	0	0	0
MTHFR	139	588	259	228	1145	170	392	1476	261	307	72	228	675	405	27	1112	610	470	450	710	15	255	322	539	526	1077	829	575	1131	721	719	1081	836	456	151	931	160	227	867	106	655	181	566	142	232	172	237	196	130
CLCN6	179	635	25	196	1193	112	516	1428	344	236	353	86	658	226	515	439	804	413	592	462	3	111	219	398	187	346	534	388	420	329	351	382	253	328	92	676	75	264	480	69	1219	241	631	195	249	167	235	181	119
AL021155.2	0	0	0	0	0	0	0	0	0	0	0	0	0	0	0	0	0	0	0	0	0	0	0	0	0	0	0	0	0	0	0	0	0	0	0	0	0	0	0	0	0	0	0	0	0	0	0	0	0
AL021155.3	0	0	0	0	0	0	0	0	0	0	0	0	0	0	0	0	0	0	0	0	0	0	0	0	0	0	0	0	0	0	0	0	0	0	0	0	0	0	0	0	0	0	0	0	0	0	0	0	0
NPPA	0	0	0	11	0	0	6	0	21	0	0	0	3	0	0	0	0	0	15	18	0	0	9	1	0	0	11	0	0	15	1	0	0	61	4	1	7	0	0	27	0	43	0	3	4	0	43	0	0
AL021155.1	0	0	0	0	0	0	0	0	0	0	0	0	0	0	0	0	0	0	0	0	0	0	0	0	0	0	0	0	0	0	0	0	0	0	0	0	0	0	0	0	0	0	0	0	0	0	0	0	0
NPPB	0	0	0	0	0	0	1	0	0	0	0	0	0	0	0	0	0	2	0	0	0	0	0	0	0	0	4	0	0	0	0	0	0	1	1	0	0	0	0	2	0	13	0	0	0	0	3	0	2
SBF1P2	0	0	0	3	0	5	1	0	0	0	0	0	1	2	0	0	0	2	1	0	0	0	0	0	0	1	0	0	3	0	0	0	1	1	2	0	0	0	0	3	0	14	0	0	0	0	0	0	1
AL021155.4	0	0	0	0	0	0	1	0	0	0	0	0	0	0	0	8	1	0	0	18	0	4	2	7	42	170	31	59	50	43	10	253	61	56	77	6	0	0	0	0	0	0	0	8	10	1	1	10	14
RNU5E-1	0	0	0	0	0	0	0	0	0	0	0	0	0	0	0	0	0	0	0	0	0	0	0	0	0	0	0	0	0	0	0	0	0	0	0	0	0	0	0	0	0	0	0	0	0	0	0	0	0
RNU5E-4P	0	0	0	0	0	0	0	0	0	0	0	0	0	0	0	0	0	0	0	0	0	0	0	1	1	4	0	1	0	0	0	1	1	0	0	0	0	0	0	0	0	0	0	1	1	0	0	0	1
KIAA2013	97	311	150	154	170	89	225	221	75	51	66	37	319	98	2	327	251	152	236	700	2	49	69	157	569	526	988	318	799	505	818	459	283	362	79	235	9	207	11	32	39	51	491	117	84	104	108	205	71
PLOD1	309	1635	449	456	888	280	1281	856	50	867	762	275	916	737	202	2012	854	531	3268	890	7	52	235	232	571	582	793	481	1504	2028	963	775	760	449	269	219	248	1557	657	354	735	423	1720	76	102	61	345	218	84
AL096840.3	0	0	0	0	0	0	0	0	0	0	0	0	0	0	0	0	0	0	0	0	0	0	0	1	0	0	0	0	0	0	1	0	1	0	0	0	0	0	0	0	0	0	0	0	0	0	0	0	0
MFN2	553	3909	1218	1474	1323	818	2283	2599	1552	1306	1260	456	2372	666	1921	3519	2153	1378	3332	1259	13	174	275	498	1571	1960	2872	1385	4470	1291	2126	2130	1772	1400	412	690	371	1460	1003	277	1268	903	5006	390	421	255	653	537	255
AL096840.2	0	0	0	0	0	0	1	0	0	0	0	0	0	0	0	0	0	0	0	0	0	0	0	0	0	0	0	0	0	0	0	0	0	0	2	0	0	0	0	0	0	5	0	0	0	0	0	0	0
MIIP	13	77	4	19	208	22	82	106	73	105	49	27	60	93	0	228	58	68	174	83	1	70	54	58	119	175	123	117	345	103	115	179	124	66	28	123	38	53	185	11	97	41	161	4	13	13	7	21	6
AL096840.1	0	0	0	0	0	0	0	0	0	0	0	0	0	0	0	0	0	0	0	0	0	0	0	0	0	0	0	0	0	0	0	0	0	0	0	0	0	0	0	0	0	0	0	0	0	0	0	0	0
MIR6729	0	0	0	0	0	0	0	0	0	0	0	0	0	0	0	0	0	0	0	0	0	0	0	0	0	0	0	0	0	0	0	0	0	0	0	0	0	0	0	0	0	0	0	0	0	0	0	0	0
RN7SL649P	0	0	0	0	0	0	0	0	0	0	0	0	0	0	0	0	0	0	0	0	0	0	0	0	0	0	0	0	0	0	0	0	0	0	0	0	0	0	0	0	0	0	0	0	0	0	0	0	0
TNFRSF8	0	2	0	0	0	0	2	0	0	17	5	0	1	10	0	0	1	1	16	3	2	19	0	0	4	16	3	18	0	20	2	24	2	4	4	1	0	0	0	16	1	43	0	0	0	0	0	1	0
RNU6-777P	0	0	0	0	0	0	0	0	0	0	0	0	0	0	0	0	0	0	0	0	0	0	0	0	0	0	0	0	0	0	0	0	0	0	1	0	0	0	0	0	0	0	0	0	0	0	0	0	0
RPL23AP89	0	0	0	0	0	1	2	0	0	0	0	0	0	0	0	0	0	0	0	0	0	0	0	0	0	0	0	0	0	0	0	0	0	0	0	0	3	0	0	1	0	0	0	0	0	0	0	0	0
AL357835.1	0	0	0	0	0	0	0	0	0	0	0	0	0	0	0	0	0	0	0	0	0	0	0	0	0	0	0	0	0	0	0	0	0	2	1	0	0	0	0	0	0	0	0	0	0	0	0	0	1
MIR7846	0	0	0	0	0	0	0	0	0	0	0	0	0	0	0	0	0	0	0	0	0	0	0	0	0	0	0	0	0	0	0	0	1	0	0	0	0	0	0	0	0	0	0	0	0	0	0	0	0
TNFRSF1B	46	118	21	24	58	34	123	86	64	78	3	7	121	129	0	66	162	177	193	832	9	423	194	77	93	1029	245	576	169	549	108	386	106	178	327	99	3	9	31	23	33	50	49	11	48	21	22	24	25
MIR4632	0	0	0	0	0	0	0	1	0	0	0	0	0	0	0	0	0	0	0	0	0	0	2	0	0	0	0	0	0	2	0	0	0	0	0	0	0	0	0	0	0	0	0	0	0	0	0	0	0
RPL10P17	0	0	0	0	0	0	0	0	0	0	0	0	0	0	0	0	0	0	0	0	0	0	0	0	0	0	0	0	0	0	0	0	0	0	0	0	0	0	0	0	0	3	0	0	0	0	0	0	0
AL031276.1	0	0	0	0	0	0	0	0	0	0	0	0	0	0	0	0	0	0	0	0	0	0	0	0	0	0	0	0	0	0	0	0	0	0	0	0	0	0	0	0	0	0	0	0	0	0	0	0	0
VPS13D	2284	9536	1933	1565	5789	2242	7490	6821	2203	1086	4074	816	10440	1577	3687	10880	7248	4681	7163	2690	31	1408	554	2149	2770	3431	3310	2141	6166	2122	3141	4699	4794	3095	942	2736	777	2760	1517	394	2368	1628	4875	1516	1550	931	1475	1780	942
SNORA59A	0	0	0	0	0	0	6	0	0	0	0	1	5	0	0	8	2	6	4	2	0	1	0	1	0	2	0	0	0	0	0	0	1	0	0	0	0	0	0	2	0	0	12	1	2	1	1	2	0
LINC02766	0	0	0	0	0	0	0	0	0	0	0	0	0	0	0	0	0	0	0	0	0	4	4	0	0	0	0	1	0	0	0	4	0	0	2	0	0	0	0	0	0	0	0	0	0	0	0	0	0
DHRS3	144	399	51	310	397	67	418	308	145	50	26	18	248	147	119	275	291	82	176	423	5	53	241	79	439	709	134	618	3068	274	232	1371	1273	328	98	51	52	134	150	33	52	60	426	27	36	4	10	65	42
RNU6ATAC18P	0	0	0	0	0	0	0	0	0	0	0	0	0	0	0	0	0	0	0	4	0	0	0	1	0	0	0	0	4	0	0	9	0	0	1	0	0	0	0	0	0	0	0	0	0	0	1	0	3
MIR6730	0	0	0	0	0	0	0	0	0	0	0	0	0	0	0	0	0	0	0	0	0	0	1	1	0	2	0	0	2	0	0	1	1	0	0	0	0	0	0	0	0	0	0	0	0	0	0	0	0
AC254633.1	0	0	0	0	0	0	0	0	0	0	0	0	0	0	0	0	0	0	0	2	0	2	2	1	1	13	3	20	6	5	1	16	6	1	1	0	0	0	0	0	0	0	0	2	0	0	0	0	1
AADACL4	0	0	0	0	0	0	2	0	0	0	0	0	0	0	0	0	0	0	0	0	0	0	0	0	0	5	0	0	0	0	0	0	0	0	1	0	15	0	0	10	0	71	0	0	0	0	1	0	0
AC244670.1	0	0	0	0	0	0	0	0	0	0	0	0	0	0	0	1	0	0	0	0	0	0	0	0	0	0	0	0	0	0	0	0	0	0	0	0	0	0	0	2	0	3	0	0	0	0	0	0	0
AADACL3	0	0	0	0	0	0	0	0	0	0	0	0	0	0	0	0	0	0	0	0	2	0	0	0	0	0	0	0	0	0	0	1	1	0	5	1	9	0	2	23	0	64	0	0	0	0	2	0	0
C1orf158	4	0	0	0	0	0	6	0	0	0	0	0	0	0	0	22	0	0	0	0	3	0	0	3	8	9	4	0	0	0	10	8	6	17	7	9	1	30	110	7	23	41	149	7	1	1	1	1	1
PRAMEF12	0	0	0	0	0	0	0	0	0	0	0	0	0	0	0	0	0	0	0	1	1	0	0	0	0	0	0	0	0	0	1	0	0	1	4	0	12	3	1	17	0	95	0	1	0	0	1	1	0
PRAMEF1	0	0	0	0	0	0	0	0	0	0	0	0	0	0	0	0	0	0	0	0	0	0	0	0	0	0	0	1	0	0	0	0	0	0	1	0	11	0	0	59	0	185	0	0	0	0	0	0	1
LINC01784	0	0	0	0	0	0	0	0	0	0	0	0	0	0	0	0	0	0	0	0	0	0	0	0	0	0	0	0	0	0	0	0	0	0	0	0	0	0	0	0	0	0	0	0	0	0	0	0	0
PRAMEF11	0	0	0	0	0	0	0	0	0	0	0	0	0	0	0	0	0	0	0	0	0	0	0	0	0	0	0	0	0	0	0	0	0	0	2	0	55	0	11	133	3	577	0	0	0	0	0	0	0
PRAMEF30P	0	0	0	0	0	0	0	0	0	0	0	0	0	0	0	0	0	0	0	0	0	0	1	0	0	0	0	0	0	0	0	0	0	0	1	0	1	0	0	47	0	174	0	0	0	0	0	0	0
HNRNPCL1	1	4	0	0	22	1	4	27	3	2	0	1	3	3	2	11	3	1	21	1	0	0	0	0	0	0	0	0	0	1	0	0	0	1	0	0	2	2	27	31	12	137	3	0	0	0	0	0	0
PRAMEF2	0	0	0	0	0	0	0	0	0	0	0	7	0	0	0	2	0	0	0	0	0	0	0	0	0	0	0	0	0	0	0	0	0	0	2	0	17	0	1	26	0	170	0	0	0	0	0	0	0
PRAMEF4	0	0	0	0	0	0	0	4	0	0	0	0	0	0	0	0	0	0	0	0	0	0	0	0	0	0	0	0	0	0	0	0	0	0	1	0	25	0	0	97	2	543	0	0	0	0	0	0	0
PRAMEF10	0	0	0	0	0	74	0	0	0	0	0	0	0	0	0	0	0	0	0	0	0	0	0	0	0	0	0	0	0	0	0	0	0	2	1	0	21	2	0	30	0	93	0	0	0	0	0	0	0
PRAMEF7	0	0	0	0	0	0	0	0	0	0	0	0	0	0	0	0	0	0	0	0	0	0	0	0	0	0	0	0	0	0	0	0	0	0	3	0	6	0	0	44	0	38	0	0	0	0	0	0	0
RNU6-1072P	0	0	0	0	0	0	0	0	0	0	0	0	0	0	0	0	0	0	0	0	0	0	0	0	0	0	0	0	0	0	0	0	0	0	0	0	0	0	0	0	0	0	0	0	0	0	0	0	0
PRAMEF29P	0	0	0	0	0	0	0	0	0	0	0	0	0	0	0	0	0	0	0	0	0	0	0	0	0	0	0	0	0	0	0	0	0	0	0	0	0	0	0	0	0	6	0	0	0	0	0	0	0
PRAMEF6	0	0	0	0	0	0	0	0	0	0	0	0	0	0	0	0	0	0	0	0	0	0	0	0	0	0	0	0	0	0	0	0	0	0	0	0	24	3	0	21	2	78	0	0	0	0	0	0	0
PRAMEF28P	0	0	0	0	0	0	0	0	0	0	0	0	0	0	0	0	0	0	0	0	0	0	0	0	0	0	0	0	0	0	0	0	0	0	0	0	16	0	0	17	0	62	0	0	0	0	0	0	0
PRAMEF27	0	0	0	0	0	0	0	0	0	0	0	0	0	0	0	0	0	0	0	0	0	0	0	0	0	0	0	0	0	0	0	0	0	0	0	0	18	2	0	34	0	25	0	0	0	0	0	0	0
HNRNPCL3	0	0	1	0	0	0	0	0	0	0	0	0	0	0	0	0	0	0	0	0	0	0	0	0	0	0	0	0	0	0	0	0	0	0	1	0	3	2	0	11	0	22	0	0	0	0	0	0	0
PRAMEF25	0	0	0	0	0	0	0	0	0	0	0	0	0	0	0	0	0	0	0	0	0	0	0	0	0	0	0	0	0	0	0	0	0	0	0	0	0	0	0	0	0	9	0	0	0	0	0	0	0
PRAMEF34P	0	0	0	0	0	0	0	0	0	0	0	0	0	0	0	0	0	0	0	0	0	0	0	0	0	0	0	0	0	0	0	0	0	0	0	0	0	0	0	0	0	0	0	0	0	0	0	0	0
PRAMEF35P	0	0	0	47	0	0	0	0	0	0	0	0	0	0	0	0	0	0	0	0	0	0	0	0	0	0	0	0	0	0	0	0	0	0	2	0	20	2	6	23	0	78	0	0	0	0	1	0	0
HNRNPCL2	0	2	0	0	0	0	5	14	0	0	0	1	2	7	0	2	0	4	5	0	0	0	0	0	0	0	1	0	0	0	0	0	0	0	0	0	18	0	1	1	1	81	0	0	0	0	0	0	0
PRAMEF36P	0	0	0	0	0	0	0	0	0	0	0	0	0	0	0	0	0	0	0	0	0	0	0	0	0	0	0	0	0	0	0	0	0	0	0	0	0	0	0	0	0	0	0	0	0	0	0	0	0
AC245056.1	0	0	0	0	0	0	0	0	0	0	0	0	0	0	0	0	0	0	0	0	0	0	0	0	0	0	0	0	0	0	0	0	0	0	0	0	0	0	0	0	0	0	0	0	0	0	0	0	0
PRAMEF26	0	0	0	0	0	0	0	0	0	0	0	0	0	0	0	0	0	0	0	0	0	0	0	0	0	0	0	0	0	0	0	0	0	0	0	0	14	0	0	19	0	152	0	0	0	0	0	0	0
HNRNPCL4	0	0	0	0	0	0	0	0	0	0	0	0	0	0	0	0	0	0	0	0	0	0	0	0	0	0	0	0	0	0	0	0	0	0	0	0	0	0	0	0	0	0	0	0	0	0	0	0	0
PRAMEF9	0	0	0	0	0	0	0	0	0	0	0	0	0	0	0	0	0	0	0	0	0	0	0	0	0	0	0	0	0	0	0	0	0	0	0	0	42	0	1	39	1	177	0	0	0	0	0	0	0
PRAMEF13	0	0	0	0	0	0	0	0	0	0	0	0	0	0	0	0	0	0	0	0	0	0	0	0	0	0	0	0	0	0	0	0	0	0	0	0	0	0	0	10	0	86	0	0	0	0	0	0	0
PRAMEF18	0	0	0	0	0	0	0	0	0	0	0	0	1	0	0	0	0	0	0	0	1	0	0	0	0	0	0	0	0	0	0	0	0	0	3	0	27	0	5	43	1	209	0	0	0	0	0	0	0
PRAMEF31P	0	0	0	0	0	0	1	35	0	0	0	0	0	0	0	0	0	0	0	0	1	0	0	0	0	0	0	0	0	0	0	0	0	0	2	0	10	1	0	55	0	284	0	0	0	0	0	0	0
PRAMEF5	0	0	0	0	0	0	0	0	0	0	0	0	0	0	0	0	0	0	0	0	0	0	0	0	0	0	0	0	0	0	0	0	0	0	0	0	1	0	6	15	0	188	0	0	0	0	0	0	0
PRAMEF32P	0	0	0	0	0	0	0	8	0	0	0	0	0	0	0	0	0	0	0	0	0	0	0	0	0	0	0	0	0	0	0	0	0	0	0	0	3	0	0	7	0	6	0	0	0	0	0	0	0
RNU6-771P	0	0	0	0	0	0	0	0	0	0	0	0	0	0	0	0	0	0	0	0	0	0	0	0	0	0	0	0	0	0	0	0	0	0	0	0	0	0	0	0	0	0	0	0	0	0	0	0	0
PRAMEF8	0	0	0	0	0	0	0	0	0	0	0	0	0	0	0	0	0	0	0	0	0	0	0	0	0	0	0	0	0	0	0	0	0	0	2	0	2	0	0	26	0	92	0	0	0	0	0	1	0
PRAMEF33	0	0	0	0	0	0	0	0	0	0	0	0	0	0	0	0	0	0	0	0	0	0	0	0	0	0	0	0	0	0	0	0	0	0	0	0	7	0	7	13	0	123	0	0	0	0	0	0	0
PRAMEF15	0	0	0	0	0	1	0	0	0	0	0	0	0	0	0	0	2	0	0	0	0	0	0	0	1	0	0	0	0	0	0	0	0	0	3	0	77	4	0	76	0	741	0	0	0	0	0	2	0
AC243961.1	0	0	0	0	0	0	0	0	0	0	0	0	0	0	0	0	0	0	0	0	0	0	0	0	0	0	0	0	0	0	0	0	0	0	0	0	0	0	0	0	0	0	0	0	0	0	0	0	1
PRAMEF14	0	0	0	0	0	0	0	0	0	0	0	0	0	0	0	0	0	0	0	0	0	0	0	0	0	0	0	0	0	0	0	0	0	0	1	0	37	2	2	40	3	281	0	0	0	0	1	0	0
PRAMEF19	0	0	0	0	0	0	0	1	0	0	0	0	1	0	0	0	0	0	0	0	0	0	0	0	0	0	0	1	0	0	0	0	0	0	1	0	32	2	1	119	0	285	2	0	0	0	0	0	0
PRAMEF17	0	0	0	0	0	0	0	0	0	0	0	0	0	0	0	0	0	0	0	0	0	0	0	0	0	0	0	0	0	0	0	1	0	0	4	0	3	0	2	74	2	295	0	0	0	0	0	0	0
PRAMEF20	0	1	0	0	0	0	0	0	0	0	594	3	0	0	0	0	0	0	0	0	0	0	0	0	0	0	0	0	0	0	0	0	0	0	4	0	22	0	5	122	1	733	1	0	0	0	1	0	0
LRRC38	0	0	0	0	0	0	0	0	0	0	0	0	0	0	0	0	0	0	0	0	0	0	0	0	0	0	0	1	0	2	0	1	0	0	0	0	6	0	0	10	0	6	0	0	0	0	0	0	0
AL354712.1	0	0	0	0	0	0	0	0	0	0	2	0	0	0	0	0	0	0	0	0	0	0	0	0	0	0	0	0	0	0	0	0	0	0	1	0	0	0	0	1	0	1	0	0	0	0	0	0	0
BRWD1P1	0	0	0	0	0	0	0	0	0	0	0	0	0	0	0	0	0	0	0	0	2	0	0	0	0	0	0	0	0	0	1	0	0	0	2	0	0	0	1	2	0	1	0	0	0	0	1	0	0
PDPN	5	119	0	0	10	6	27	48	0	49	0	0	3	66	5	192	123	7	50	52	1	33	8	12	20	120	32	158	10	161	4	264	39	99	73	15	2	4	7	47	2	49	40	4	9	7	111	12	16
RNA5SP41	0	0	0	0	0	0	0	0	0	0	0	0	0	0	0	0	0	0	0	0	0	0	0	0	0	0	0	0	0	0	0	0	0	0	1	0	0	0	0	0	0	0	0	0	0	0	0	0	0
AL359771.1	0	0	0	0	0	0	0	0	0	0	0	0	0	0	0	0	0	0	0	0	0	0	0	0	0	0	0	0	0	0	0	0	1	0	2	0	0	0	0	0	0	0	0	0	0	0	0	0	0
AL359771.2	0	0	0	0	0	0	0	0	0	0	0	0	0	0	0	0	0	0	0	0	0	0	0	0	0	0	0	0	0	0	0	0	0	0	0	0	0	0	0	0	0	0	0	0	1	0	0	0	2
PRDM2	862	2165	380	823	1246	651	7240	1267	411	962	2160	257	4689	1915	734	1720	2029	4731	2299	1000	21	756	196	807	891	1370	881	1101	1202	815	977	1643	1235	1455	636	731	666	461	691	235	616	359	769	275	388	178	2018	245	351
KAZN	4	88	4	11	239	26	255	108	127	24	0	3	17	46	94	158	99	385	288	260	6	10	131	54	82	316	122	244	217	389	132	199	161	214	91	187	25	20	50	21	89	45	4	18	102	57	302	124	53
RNU6-1265P	0	0	0	0	0	0	0	0	0	0	0	0	0	0	0	0	0	0	0	0	0	0	0	0	0	0	0	0	1	0	0	0	0	0	0	0	0	0	0	0	0	0	0	0	0	0	0	0	0
AL357873.1	0	0	0	0	0	0	0	0	0	0	0	0	0	0	0	0	0	0	0	0	0	0	0	0	1	1	1	1	3	0	0	0	1	0	5	0	0	0	0	0	0	0	0	0	0	0	1	1	1
KAZN-AS1	0	0	0	0	0	0	0	0	0	0	0	0	0	0	0	0	0	0	0	0	2	0	0	0	0	0	0	1	0	0	0	2	1	0	6	0	0	0	0	0	0	0	0	0	0	0	2	1	2
TBCAP2	0	0	0	0	0	0	0	0	0	0	0	0	0	3	0	0	0	0	0	0	0	0	0	0	0	0	0	0	0	0	0	0	0	0	1	0	0	0	0	0	0	0	0	0	0	0	0	0	0
AL031293.1	0	0	0	0	0	0	0	0	0	0	0	0	0	0	0	0	0	0	0	0	1	0	0	0	0	0	0	0	0	0	0	0	0	0	2	0	0	0	0	1	0	0	0	0	0	0	1	0	0
TMEM51-AS1	1	17	0	16	35	2	70	34	26	1	0	2	3	6	105	15	11	2	11	60	0	2	12	35	34	37	8	143	9	20	57	21	11	24	17	28	5	0	1	7	0	20	1	9	17	2	59	8	10
TMEM51	16	257	7	141	49	22	247	204	157	15	2	13	128	72	3	72	207	83	140	191	0	13	25	69	167	144	65	148	68	115	143	101	64	123	76	43	21	83	42	8	10	25	93	21	23	6	73	17	14
C1orf195	0	1	0	0	0	0	0	0	0	0	0	0	0	13	0	2	0	5	0	0	0	0	0	0	0	0	0	0	0	0	0	0	1	0	1	0	12	0	0	6	0	47	0	0	0	0	0	0	0
MFFP1	0	0	0	0	0	0	0	0	0	0	0	0	0	0	0	0	2	0	0	0	0	0	0	0	0	0	0	0	0	0	0	0	1	0	5	0	0	0	0	1	0	8	0	0	0	0	0	0	0
ZBTB2P1	0	0	0	0	0	0	0	0	0	0	0	0	0	0	0	0	0	1	0	4	0	0	1	1	1	0	0	0	0	2	0	0	0	4	1	1	0	0	0	0	0	0	0	1	1	0	0	0	0
FHAD1	78	77	25	31	112	27	90	116	0	84	1096	8	165	13	32	327	94	80	133	146	10	4	102	77	143	103	150	85	20	44	94	77	113	128	54	80	189	189	1143	617	458	237	163	42	51	19	110	33	18
FHAD1-AS1	0	0	0	0	0	0	1	0	0	0	0	0	0	0	0	1	3	1	1	44	0	1	46	57	75	32	83	0	3	1	195	44	54	9	4	269	0	0	0	8	0	6	0	43	7	122	0	3	5
AL031283.2	0	0	0	0	0	0	0	0	0	0	0	0	0	0	0	0	0	0	1	4	1	0	2	8	5	1	2	0	0	0	2	3	4	2	1	31	0	0	0	0	0	0	0	9	0	27	0	0	1
AL031283.1	0	0	0	0	0	0	1	0	0	1	0	0	0	0	0	1	0	1	0	31	1	1	4	25	16	41	45	15	2	12	19	16	4	11	14	41	0	0	0	0	0	0	0	24	16	14	1	10	5
EFHD2	135	1058	45	116	550	137	1121	621	233	679	1866	279	481	393	114	962	881	963	872	1625	16	210	336	780	1418	1817	2205	1020	467	1042	1842	799	457	1160	302	1409	568	433	660	301	293	338	894	106	124	107	42	151	175
CTRC	6	16	33640	1	0	4	40870	11	2	1	74	1	18	1	0	11	4	38	5	6	1	1	11	5	4	10	14	4	0	2	2	1	0	6	1	7	4703	1	12042	55	6	46	73	0	1	2	1	0	3
CELA2A	21	29	26586	0	1	0	127300	0	2	1	36	0	56	0	0	0	11	0	1	0	0	0	0	0	0	1	0	0	0	0	0	0	0	0	1	0	966	0	5827	34	7	38	78	0	0	0	0	0	0
CELA2B	7	6	9637	0	0	0	18702	0	0	0	75	0	10	0	0	3	0	1	5	0	0	0	0	0	0	0	0	1	0	0	0	0	0	0	1	0	516	0	2879	11	3	72	19	0	0	1	0	0	0
CASP9	89	195	156	172	236	72	476	221	234	58	73	20	323	53	349	365	126	378	168	338	1	27	95	113	133	238	220	145	204	167	225	204	163	205	67	229	62	73	83	21	113	60	75	34	85	51	71	82	48
DNAJC16	310	597	640	349	611	310	1753	492	190	260	217	99	982	198	249	985	746	1305	655	552	6	160	61	341	715	642	1282	428	612	680	992	683	583	680	164	453	52	294	246	64	295	197	829	424	313	206	389	342	205
SCARNA21B	0	0	0	0	0	0	1	0	0	0	0	0	0	0	0	2	0	0	0	3	0	1	0	0	1	1	2	1	0	0	0	0	3	0	1	0	0	0	0	0	0	0	0	3	4	2	2	0	1
AL121992.3	0	3	0	0	0	0	7	6	0	0	0	2	0	0	0	3	3	1	0	0	1	2	0	0	0	0	0	0	0	0	1	0	0	0	1	0	2	0	0	10	0	12	0	1	0	1	1	0	0
AGMAT	5	61	0	109	74	40	30	23	1	3	1	50	11	34	23	64	44	21	14	0	2	37	4	4	5	7	1	2	19	6	11	9	12	8	3	3	6	4	1	14	4	38	47	0	2	0	22	3	0
AL121992.1	0	0	0	0	0	0	1	0	0	0	0	0	0	3	0	0	0	0	0	0	2	0	0	5	4	4	4	2	5	2	6	4	7	5	4	6	0	0	0	2	0	0	0	2	0	2	1	1	3
CHCHD2P6	1	3	1	0	4	0	7	2	4	0	0	1	6	1	0	11	2	11	8	3	0	0	0	1	3	6	5	3	6	3	5	4	6	0	1	1	0	3	0	10	1	4	9	3	1	1	2	2	0
RNU7-179P	0	0	0	0	0	0	0	0	0	0	0	0	0	0	0	0	0	0	0	0	0	0	0	0	0	0	0	0	0	0	1	0	0	0	0	0	0	0	0	0	0	0	0	0	0	0	0	0	0
CD24P1	0	0	0	0	0	0	0	0	0	0	0	0	0	0	0	0	0	0	0	0	0	0	0	0	1	0	0	0	0	0	0	0	0	0	0	0	0	0	0	0	0	0	0	0	0	0	0	0	1
DDI2	108	469	73	268	445	209	1200	347	121	67	360	106	514	208	115	473	620	863	825	598	11	280	205	330	702	696	875	554	583	462	762	827	648	781	312	426	301	131	571	31	373	135	609	404	329	291	644	410	340
RSC1A1	0	0	0	0	0	0	0	0	0	0	0	0	0	0	0	0	0	0	0	0	0	0	0	0	0	0	0	0	0	0	0	0	0	0	0	0	0	0	0	0	0	0	0	0	0	0	0	0	0
AL121992.2	0	0	0	0	0	0	0	0	0	0	0	1	0	0	0	0	0	0	0	0	0	0	0	0	0	0	0	0	0	0	0	0	0	0	1	0	0	0	0	0	0	0	0	0	0	0	0	0	0
PLEKHM2	227	897	400	291	883	226	1188	898	156	362	247	152	913	321	190	757	676	1032	806	982	8	278	354	377	421	889	998	641	911	814	605	999	483	505	305	508	73	541	1181	194	691	122	1229	64	99	87	119	143	52
AL450998.3	0	0	0	0	0	0	1	0	0	0	0	0	0	0	0	1	0	0	0	0	0	0	0	0	0	0	0	0	0	0	0	0	0	0	3	0	0	0	0	0	0	1	0	0	0	0	0	0	0
SLC25A34	1	2	3	1	9	0	12	4	0	0	0	0	4	0	0	2	6	4	2	122	0	14	39	51	21	30	70	13	15	43	88	27	36	38	8	109	0	0	6	0	2	12	7	15	11	14	20	14	5
SLC25A34-AS1	0	0	0	0	0	0	0	0	0	0	0	0	0	0	0	0	0	0	0	2	0	0	1	0	0	1	1	0	1	0	0	1	0	0	3	0	0	0	0	0	0	0	0	0	1	0	0	0	0
TMEM82	0	6	0	46	41	2	2	41	18	0	0	0	0	0	0	0	28	0	0	0	0	0	0	0	0	0	0	0	1	2	0	0	0	0	0	0	0	0	0	0	0	5	0	0	0	0	0	0	0
FBLIM1	8	220	70	38	191	121	108	224	67	107	43	107	126	113	0	31	165	89	59	1072	10	50	308	100	125	640	226	203	209	483	134	403	194	211	602	66	17	52	39	13	42	18	36	12	39	15	122	64	38
RPL12P14	0	0	0	0	0	0	3	0	2	0	1	0	2	0	0	2	6	0	0	0	0	0	0	0	1	1	0	0	1	0	1	0	0	0	1	0	1	0	0	0	0	7	0	0	0	0	0	1	1
UQCRHL	47	140	0	53	37	34	174	70	1	226	129	123	109	111	8	122	97	82	449	39	0	5	7	10	19	9	21	12	7	16	10	30	19	9	10	18	9	40	33	34	42	52	213	21	19	16	33	23	5
AL450998.1	0	1	1	1	1	0	1	7	2	8	0	0	4	0	0	10	7	0	2	4	0	1	0	0	0	1	3	1	4	1	1	0	0	0	4	1	0	1	1	5	0	7	1	0	1	0	0	0	1
AL450998.2	1	1	0	3	1	0	1	5	0	0	0	1	1	3	0	1	0	4	2	46	0	6	16	18	42	35	74	31	42	29	82	46	42	23	7	35	0	0	0	0	0	1	1	6	11	7	4	17	2
SPEN	2207	4685	1104	1639	3239	1347	8874	4086	1598	874	3899	829	6498	1062	2593	6024	5143	6795	5507	3178	33	1171	771	1946	2029	3055	3100	2221	2560	2239	2548	3196	2390	3095	1736	2326	561	1216	1341	259	2063	792	2962	961	1136	758	1347	921	679
AL034555.1	0	0	0	0	0	0	0	0	0	0	0	0	0	0	0	0	0	0	0	0	0	0	0	0	0	0	0	0	0	0	0	0	0	0	0	1	0	0	0	0	0	0	0	0	0	0	0	0	0
ZBTB17	49	137	64	58	197	44	185	238	138	58	6	40	223	114	78	138	213	197	257	274	6	113	210	118	177	236	340	205	391	330	216	283	243	179	64	194	276	121	1384	848	269	111	394	24	33	27	23	52	18
AL355994.4	0	0	0	0	0	0	0	3	0	0	0	0	0	0	0	0	0	0	0	0	0	0	0	0	0	0	0	0	0	0	0	0	0	0	0	1	3	0	0	0	0	7	0	0	0	1	0	0	0
AL355994.1	0	0	0	0	0	0	0	0	0	0	0	0	0	0	0	0	0	0	0	0	0	0	0	0	0	0	0	0	0	0	0	0	0	0	0	0	0	0	0	0	0	0	0	0	0	0	0	0	0
AL355994.5	0	0	0	0	0	0	0	0	0	0	0	0	0	0	0	0	0	0	0	0	0	0	0	0	0	0	0	0	0	0	0	0	0	0	0	0	0	0	0	0	0	0	0	0	0	0	0	0	0
TBC1D3P6	0	0	0	0	0	0	0	0	0	0	0	0	0	0	0	1	0	0	0	0	0	0	0	0	0	0	0	0	0	0	0	0	0	0	0	0	0	0	1	2	0	15	0	0	0	0	0	0	0
SRARP	0	0	0	0	0	0	0	0	0	0	0	0	0	0	0	0	0	0	0	0	1	0	0	9	10	1	2	0	40	0	7	18	12	3	7	2	0	0	0	0	0	0	0	0	0	0	1	0	2
AL355994.3	0	0	0	0	0	0	0	0	0	0	0	0	0	0	0	0	0	0	0	0	0	0	0	0	0	0	0	0	0	0	0	0	0	0	0	0	0	0	0	0	0	1	0	0	0	0	0	0	0
HSPB7	7	269	0	0	21	6	8	7	0	0	6	0	1	19	100	6	61	10	8	357	3	0	27	37	45	163	418	367	302	464	430	152	67	63	265	97	0	0	3	9	0	22	3	3	6	18	4	4	10
CLCNKA	0	9	70	0	21	0	953	16	0	89	1298	0	12	25	0	256	17	1884	8	522	1	0	364	93	23	132	931	1599	405	707	393	93	120	405	106	608	53	11	54	66	5	273	0	34	206	60	770	182	57
AL355994.2	2	31	50	0	8	0	2	0	0	0	0	4	21	1	0	2	20	3	1	9	0	0	4	2	0	0	19	4	1	9	9	0	1	1	0	17	0	22	0	2	5	3	62	0	1	0	0	1	0
CLCNKB	0	18	80	53	62	17	64	19	0	0	12	0	5	1	2	117	82	63	3	33	0	0	26	15	53	22	59	32	289	39	33	181	142	73	17	49	13	13	17	70	0	208	24	17	21	0	58	25	4
FAM131C	7	108	16	160	35	12	16	111	36	9	1	7	49	8	0	9	161	10	2	71	1	0	11	63	9	8	75	25	3	43	76	1	3	23	4	122	1	54	22	34	14	17	105	13	7	0	3	2	3
EPHA2	42	165	50	118	107	10	256	59	80	107	203	202	138	448	0	982	87	226	484	379	1	68	195	211	134	771	127	165	842	273	204	458	141	278	69	158	472	44	764	52	150	87	98	11	6	7	21	21	21
AL451042.2	0	0	0	0	0	0	0	0	0	0	0	0	0	2	0	0	0	0	0	4	0	1	0	8	2	14	0	3	8	4	1	2	1	1	0	0	0	0	0	0	0	0	0	0	0	0	2	0	1
AL451042.1	0	0	0	0	0	0	0	0	0	0	0	0	0	0	0	0	0	0	0	4	0	1	1	12	1	5	0	0	2	3	0	0	0	6	2	0	0	0	0	0	0	0	0	0	0	0	1	1	0
ARHGEF19-AS1	0	0	0	0	0	0	0	0	0	0	0	0	0	0	0	0	0	0	0	0	0	0	0	0	0	0	0	0	0	0	0	0	0	0	0	0	0	0	0	0	0	0	0	0	0	0	0	0	0
ARHGEF19	2	2	0	2	24	2	39	4	11	92	2	5	6	33	0	9	26	33	26	292	3	23	89	79	150	143	53	48	295	276	195	169	225	170	17	225	33	4	19	4	6	33	21	100	12	10	103	34	14
ANO7L1	2	13	0	9	68	0	17	0	6	38	2	4	11	3	0	5	12	12	3	86	2	0	16	24	15	16	20	36	17	14	48	41	47	19	5	86	1	0	1	2	5	14	18	31	5	5	5	9	1
AL109627.1	11	10	10	2	8	0	67	10	0	0	0	12	30	6	0	29	26	43	11	139	3	9	31	97	187	129	235	93	140	105	262	149	193	134	21	162	0	3	0	0	0	5	14	52	29	24	31	42	15
CPLANE2	10	24	0	6	20	14	52	36	38	29	25	11	28	9	10	26	20	51	14	68	1	6	21	46	70	113	122	56	133	56	175	67	107	56	11	77	4	13	6	1	27	7	30	20	14	14	13	13	7
MT1XP1	0	3	2	34	4	25	6	13	0	0	6	0	9	10	0	13	1	6	8	0	0	0	1	0	3	3	3	1	176	9	4	2	3	0	0	5	2	4	0	3	5	1	3	0	0	1	0	0	0
FBXO42	208	624	228	110	528	245	1294	456	159	49	609	101	921	157	705	799	713	1314	703	589	0	184	151	299	550	566	686	433	698	501	665	616	409	423	141	582	72	228	219	60	179	161	510	379	327	186	354	324	193
SZRD1	179	489	177	176	114	206	724	121	153	75	183	62	668	97	566	359	536	453	381	1157	23	224	193	348	973	1487	1341	827	1712	995	1236	1849	1001	946	429	469	64	278	156	85	88	72	652	116	173	137	302	219	238
RPL22P3	0	1	0	0	1	0	1	0	0	1	0	0	0	0	1	2	0	0	1	0	0	0	0	0	0	0	0	1	0	0	0	0	0	1	0	0	0	0	0	0	0	4	3	0	0	0	0	0	1
SPATA21	0	1	0	0	1	0	1	0	0	0	0	24	0	3	0	1	3	0	0	0	0	0	1	0	1	0	0	0	0	2	2	1	0	0	2	0	8	0	7	24	0	32	0	1	0	0	3	0	0
NECAP2	64	222	176	80	214	11	347	252	172	255	61	65	248	175	45	285	279	403	497	373	15	328	98	124	383	488	512	453	630	319	438	685	404	316	159	237	119	185	353	46	250	110	448	107	104	83	121	187	77
LINC01772	0	0	0	0	0	0	1	1	8	3	0	0	0	2	0	5	1	3	2	10	1	74	8	21	12	11	13	26	5	16	10	21	20	4	9	35	0	0	0	0	0	0	0	14	9	12	14	13	18
CROCCP3	14	79	30	5	130	7	67	141	18	22	2	16	92	56	7	45	71	139	59	134	20	109	379	232	106	93	224	235	82	76	61	115	92	111	35	461	134	145	808	64	270	22	143	73	136	85	109	109	66
RNU1-1	0	0	0	0	0	0	1	0	0	0	0	0	0	0	0	0	0	2	0	2	0	2	0	0	0	0	0	0	0	0	0	0	0	1	0	0	0	0	0	0	0	0	0	4	1	1	0	0	3
AL137802.2	0	0	0	0	0	0	0	0	0	0	0	0	0	0	0	0	0	0	0	0	0	0	0	0	2	0	1	1	2	0	1	1	1	1	1	0	0	0	0	0	0	0	0	1	2	1	0	0	0
AL137802.3	0	0	0	0	0	0	0	0	0	0	0	0	0	0	0	0	0	0	0	0	0	0	0	0	0	1	0	0	0	0	0	0	0	0	0	0	0	0	0	0	0	0	0	1	1	0	0	0	0
AL137802.1	0	0	0	0	0	0	0	0	0	0	0	0	0	0	0	0	0	0	0	0	0	0	0	0	0	0	0	0	0	0	0	0	0	0	0	0	0	0	0	0	0	0	0	0	0	0	0	0	0
LINC01783	0	0	0	0	0	0	1	0	0	0	0	0	0	1	0	0	0	0	0	8	0	0	0	1	0	6	1	5	1	1	0	12	10	0	3	0	6	0	0	2	1	40	0	0	0	0	0	1	0
RNU1-6P	0	0	0	0	0	0	0	0	0	0	0	0	0	0	0	0	0	0	0	0	0	0	0	0	0	0	0	0	0	0	0	0	0	0	1	0	0	0	0	0	0	0	0	0	0	0	0	0	0
AL355149.1	0	0	0	0	0	0	0	0	0	0	0	0	0	0	0	0	0	0	0	0	0	0	0	0	0	0	0	0	0	0	0	0	0	1	0	0	1	0	0	3	1	16	0	0	0	0	0	0	0
NBPF1	158	1272	379	113	608	726	2530	651	22	1046	299	176	966	765	878	2622	480	1798	1487	188	1	53	62	108	169	170	131	123	146	33	158	212	128	69	41	163	7612	2953	8265	745	22338	1843	14268	248	120	106	150	141	144
AL137798.1	0	0	0	0	0	0	0	0	0	0	0	0	0	0	0	0	0	0	0	0	1	0	0	1	0	0	0	1	0	0	1	0	0	0	4	0	0	0	0	0	0	0	0	0	0	0	0	0	1
CROCCP2	12	114	33	42	138	7	93	221	84	85	11	54	67	183	14	97	60	131	221	197	17	358	224	208	162	165	215	155	169	129	146	169	113	177	39	346	156	79	380	36	483	37	106	116	53	53	93	55	78
AL137798.3	0	0	0	0	0	0	0	0	0	0	0	0	0	0	0	0	0	0	0	0	0	0	0	0	0	0	0	0	0	0	0	0	0	0	0	0	0	0	0	0	0	0	0	0	0	0	0	0	0
MST1P2	6	60	17	12	72	93	146	141	171	34	2	28	278	102	91	77	84	255	27	32	0	4	2	5	15	8	4	5	9	1	5	6	7	10	1	25	534	21	169	53	358	90	386	7	4	2	1	12	2
AL137798.2	0	0	0	0	0	0	0	0	0	0	0	0	0	0	0	0	0	0	0	0	0	0	0	0	0	0	0	0	0	0	0	0	0	0	0	0	0	0	0	0	0	0	0	0	0	0	0	0	0
RNU1-3	0	0	0	0	0	0	0	0	0	0	0	0	0	0	0	0	0	0	0	2	0	0	0	0	0	0	0	0	0	0	0	0	0	0	0	0	0	0	0	0	0	0	0	0	0	1	0	0	1
AL021920.2	0	0	0	0	0	0	0	0	0	0	0	0	0	0	0	1	0	0	1	0	0	3	0	0	0	0	0	0	0	0	0	0	0	0	4	0	0	0	2	9	2	2	0	0	0	0	0	0	0
EIF1AXP1	3	9	0	3	0	0	49	1	38	5	100	11	18	20	6	31	13	46	77	3	1	0	0	7	2	0	8	4	3	15	10	3	4	3	1	3	2	5	0	10	7	11	7	5	2	2	1	4	0
ESPNP	2	3	0	0	0	2	6	1	0	69	0	15	1	6	0	1	14	12	5	0	0	15	5	0	0	1	1	0	1	0	1	0	0	1	1	3	20	6	25	27	18	29	2	0	1	0	0	1	0
AL021920.1	0	0	0	0	0	0	0	0	0	0	0	1	0	1	0	6	0	0	0	0	0	0	0	0	0	0	0	0	0	0	0	0	0	0	0	0	0	0	1	0	0	9	0	0	0	0	0	0	1
AL021920.3	0	0	0	0	0	0	0	0	0	0	0	0	0	0	0	0	0	0	0	0	0	0	0	0	0	0	0	0	0	0	0	0	0	0	0	0	0	0	0	0	0	0	0	0	0	0	0	0	0
CROCC	49	319	225	80	731	63	214	1008	170	251	69	69	222	348	19	279	403	352	384	297	20	247	885	255	157	252	372	312	182	199	263	204	141	105	54	466	523	171	3615	294	810	167	313	23	34	39	35	64	27
CROCCP4	0	0	0	0	0	0	0	0	0	0	0	0	0	0	0	0	0	0	0	0	0	0	0	0	0	0	0	0	0	0	0	0	0	0	0	0	1	0	0	0	0	0	0	0	0	0	0	0	0
RNU1-4	0	0	0	0	0	0	1	0	0	0	0	0	0	0	0	0	1	0	0	4	0	0	0	0	0	0	0	0	0	0	0	0	0	0	0	0	0	0	0	0	0	0	0	0	1	0	1	0	6
MST1L	12	58	0	37	118	59	184	14	108	24	16	19	512	54	0	17	30	98	3	7	0	1	0	3	1	0	3	1	0	0	0	2	2	3	1	6	368	34	679	68	387	60	295	11	7	1	0	2	4
BX284668.1	0	0	0	0	0	0	0	0	0	0	0	0	0	0	0	0	0	0	0	0	0	0	0	0	0	0	0	0	0	0	0	0	0	0	0	0	0	0	0	0	0	0	0	0	0	0	0	0	0
BX284668.3	0	0	0	0	0	1	0	0	0	0	0	0	0	0	0	0	0	0	0	0	0	1	0	0	0	0	0	0	0	0	0	0	0	0	1	0	5	0	0	1	0	2	0	0	0	0	0	0	0
MIR3675	0	0	0	0	0	0	0	0	0	0	0	0	0	0	0	0	0	0	0	0	0	0	0	0	0	0	0	0	0	0	0	0	0	0	0	0	0	0	0	0	0	0	0	0	0	0	0	0	0
BX284668.2	0	0	0	55	0	0	0	0	0	0	0	0	0	0	0	0	0	0	0	9	1	0	1	0	1	0	0	5	0	4	1	17	16	0	3	1	0	0	0	1	0	9	0	0	0	1	0	0	2
RNU1-5P	0	0	0	0	0	0	0	0	0	0	0	0	0	0	0	0	0	0	0	0	0	0	0	0	0	0	0	0	0	0	0	0	0	0	0	0	0	0	0	0	0	0	0	0	0	0	0	0	0
BX284668.5	0	0	0	0	0	0	4	0	0	0	0	0	0	1	0	1	0	0	0	14	0	4	13	10	65	10	17	19	41	20	51	44	29	38	7	10	0	0	0	0	0	0	0	7	13	7	2	2	5
BX284668.4	0	0	0	0	0	0	0	0	0	0	0	0	0	0	0	0	0	0	0	0	0	0	0	0	0	0	0	0	0	0	1	0	0	0	0	0	0	0	0	0	0	0	0	0	0	0	0	0	0
RNU1-2	0	0	0	0	0	0	3	0	0	0	0	0	0	0	0	0	0	2	0	2	0	2	0	0	1	6	0	4	0	7	1	1	0	0	3	1	0	0	0	0	0	0	0	1	3	0	0	6	2
BX284668.6	0	0	0	0	0	0	0	0	0	0	0	0	0	0	0	0	0	0	0	2	0	0	0	0	4	0	0	3	1	2	2	9	3	0	2	0	0	0	0	0	0	0	0	1	3	1	0	2	2
MFAP2	7	124	0	38	35	1	77	21	0	22	5	5	7	246	4	1783	93	21	83	51	2	0	9	2	15	21	9	23	5	33	40	51	21	43	18	14	4	3	14	14	9	34	153	2	13	0	13	8	1
AL049569.2	1	0	0	33	0	0	0	0	0	0	0	0	2	1	0	19	0	0	3	0	0	0	0	0	0	0	0	0	0	0	0	0	0	0	1	1	0	0	0	0	3	0	0	0	0	0	0	0	0
AL049569.1	0	1	0	0	0	8	1	3	0	0	0	0	1	1	0	1	2	0	2	0	0	0	0	1	0	1	0	0	0	0	0	0	3	0	1	0	3	0	2	0	0	13	0	0	0	0	0	0	0
ATP13A2	150	575	472	252	456	146	1417	439	182	444	102	177	1329	312	105	850	409	1212	835	556	6	146	283	284	384	454	801	447	544	461	820	391	339	234	40	596	52	637	182	132	490	174	1316	32	55	50	62	127	25
SDHB	253	894	599	367	213	279	2441	236	223	298	770	247	1435	240	313	2302	625	1524	1484	405	6	72	40	112	727	470	972	301	957	603	781	742	589	544	171	190	56	550	125	121	325	323	2435	180	175	105	213	264	52
PADI2	4	126	21	33	168	3	304	290	66	91	12	1	15	224	95	105	64	340	33	248	18	4	94	18	40	72	193	61	30	38	34	114	12	110	253	33	21	4	10	31	3	52	12	1	49	16	11	5	11
LINC02783	0	0	0	0	0	0	0	0	0	0	0	0	0	0	0	0	0	0	0	0	1	0	0	0	0	0	0	0	0	0	0	0	0	2	6	0	0	0	0	0	0	0	0	0	0	0	0	0	1
AL590644.1	0	0	0	0	0	0	0	0	0	0	0	0	0	0	0	0	0	0	0	0	0	0	0	0	0	0	0	0	0	0	0	0	0	1	0	0	0	0	0	0	0	0	0	0	0	0	0	0	1
PADI1	0	0	0	0	0	0	2	4	0	0	0	0	0	11	0	0	0	1	3	0	3	0	1	0	2	16	9	26	0	0	2	1	1	2	12	0	14	0	0	27	0	55	1	0	0	0	0	0	0
PADI3	0	0	0	0	0	25	0	0	0	9	0	0	0	4	0	0	0	1	0	0	0	0	0	0	0	1	0	3	0	1	0	1	0	0	4	0	7	2	0	22	0	77	0	0	0	0	0	0	0
MIR3972	0	0	0	0	0	0	0	0	0	0	0	0	0	0	0	0	0	0	0	0	0	0	0	0	0	0	0	0	0	0	0	0	0	0	0	0	0	0	0	0	0	0	0	0	0	0	0	0	0
PADI4	8	0	0	8	0	0	2	0	0	0	0	0	9	60	0	4	10	0	8	2	1	1	2	0	5	17	0	9	5	34	0	27	6	4	26	0	6	0	0	31	0	46	8	0	0	0	0	0	0
PADI6	0	0	0	0	0	3	0	0	0	0	0	0	0	0	0	0	0	0	1	0	1	0	0	0	0	1	0	1	0	1	0	0	1	0	3	0	9	1	0	12	1	76	0	0	0	0	2	0	1
RCC2-AS1	0	0	0	0	0	0	0	0	0	0	0	0	0	0	0	0	0	0	0	2	0	0	0	0	0	0	0	0	0	0	0	1	0	0	1	0	0	0	0	0	0	0	0	0	0	0	0	0	0
RCC2	113	586	149	150	385	88	1316	425	137	1253	591	447	748	1018	184	2195	486	1528	3313	872	12	242	182	155	362	564	480	473	729	459	532	642	314	371	265	305	105	135	190	70	159	110	326	101	193	112	340	292	126
ARHGEF10L	753	1877	501	700	3805	621	984	4477	1442	145	314	470	1980	588	312	198	2804	732	359	412	7	35	160	100	274	369	49	229	1079	87	221	810	519	186	103	149	580	1120	764	171	1560	160	1967	6	6	3	18	29	27
LINC02810	0	0	0	0	0	0	0	0	0	0	0	0	0	0	0	0	0	0	0	0	1	0	0	0	0	0	0	0	0	0	0	0	0	0	4	0	0	0	0	0	0	0	0	0	0	0	1	0	0
ACTL8	0	0	0	0	0	0	0	0	0	0	0	2	0	0	0	29	0	0	7	0	0	0	0	0	0	0	0	0	0	0	0	0	0	0	5	0	6	0	0	7	0	8	0	0	0	0	1	0	0
AL357509.1	0	0	0	0	0	0	0	0	0	0	0	0	0	0	0	0	0	0	0	2	0	0	0	8	0	0	0	0	0	0	0	0	0	3	6	0	0	0	0	0	0	0	0	4	2	0	3	0	0
LINC01654	0	0	0	0	0	0	0	0	0	0	0	0	0	0	0	0	0	0	0	77	0	0	1	5	0	2	5	15	0	6	5	2	0	44	12	4	0	0	0	0	0	0	0	1	4	0	3	74	0
IGSF21	9	18	0	0	43	9	1144	33	7	45	38	1	58	17	0	13	17	1616	40	952	5	2	133	248	391	284	927	584	8	1444	541	26	3	671	183	307	6	7	109	56	108	75	58	104	205	47	123	478	90
AL365209.1	0	0	2	0	0	0	8	0	0	0	0	0	0	6	0	0	0	34	0	156	1	3	121	182	22	20	63	335	0	262	16	3	0	97	43	256	0	0	1	2	0	0	0	93	402	78	170	451	115
IGSF21-AS1	0	0	0	0	0	0	0	0	0	0	0	0	0	0	0	0	0	0	0	0	0	0	0	0	0	0	0	0	0	1	0	0	0	0	0	0	0	0	0	0	0	0	0	0	0	0	0	0	0
AL591896.1	0	0	0	0	0	0	0	0	0	0	0	0	0	0	0	0	0	0	0	0	0	0	0	0	0	0	0	2	0	3	0	0	0	0	0	0	0	0	0	0	0	0	0	2	0	0	0	0	1
KLHDC7A	1	0	0	23	0	0	43	0	0	1	0	0	6	8	0	0	0	35	0	2	1	0	0	79	22	49	5	2	277	0	228	91	110	17	3	95	3	1	0	23	3	7	0	0	0	0	56	4	3
DYNLL1P3	0	1	0	0	0	0	0	0	0	0	0	1	0	0	0	2	0	0	0	0	0	0	0	0	0	0	0	0	0	0	0	0	0	0	0	0	0	0	0	9	0	5	0	0	0	0	0	0	0
AL031737.1	0	0	0	0	0	0	0	0	0	0	0	0	0	0	0	0	0	0	0	0	0	0	0	0	0	0	0	0	0	0	0	0	0	0	0	1	0	0	0	0	0	0	0	0	0	0	0	0	0
PAX7	0	0	0	0	0	0	0	0	0	0	535	0	0	0	0	0	0	0	0	1797	24	0	301	1	2	1043	3435	938	0	5667	0	2	1	2131	1158	1	1	0	4	15	0	22	1	361	1021	1142	782	1413	405
TAS1R2	0	0	0	0	0	0	0	0	0	0	0	0	0	0	0	2	13	0	0	0	1	0	0	0	0	0	0	0	0	0	0	3	0	0	0	0	11	0	0	46	0	108	0	0	0	0	0	0	0
ALDH4A1	6	42	0	85	36	18	67	30	45	50	13	25	57	67	0	118	44	76	130	131	0	14	31	72	146	209	269	220	311	62	429	218	125	63	17	202	4	11	23	34	47	46	51	17	15	10	36	27	13
MIR4695	0	0	0	0	0	0	0	0	0	0	0	0	0	0	0	0	0	0	0	0	0	0	0	0	0	0	0	0	0	0	0	0	0	0	0	0	0	0	0	0	0	0	0	0	0	0	0	0	0
MIR1290	5	1	0	0	0	0	2	0	0	0	7	3	0	2	0	6	0	2	4	0	1	0	0	0	0	0	0	0	0	0	0	0	0	0	0	0	5	0	3	0	0	4	0	0	0	0	0	1	0
IFFO2	19	116	8	36	89	1	366	62	0	67	0	14	71	93	22	53	85	252	264	406	6	188	101	124	268	513	393	147	521	117	839	296	221	277	168	462	1112	25	938	48	196	82	81	43	42	51	109	64	54
AL137127.1	0	0	0	0	1	0	0	12	0	0	0	0	2	0	0	0	0	3	0	19	0	6	7	8	6	20	14	26	3	13	17	11	7	15	6	47	0	0	0	0	1	1	0	5	10	9	11	9	7
UBR4	4338	10609	3550	4230	6986	3088	14952	7391	3104	2729	7600	1964	21826	2378	2380	12597	10517	15913	14314	6649	45	2205	1475	4447	3194	5268	6774	4147	7408	3847	5283	4354	3342	4283	1616	5362	915	3990	2691	412	5190	2129	8059	2280	3249	2257	3010	3463	1147
EMC1-AS1	11	8	0	10	19	0	41	0	6	0	0	0	21	3	0	14	11	31	10	6	0	2	3	2	5	7	9	6	18	4	17	7	10	5	0	3	0	22	14	0	7	0	9	4	1	2	2	2	2
EMC1	264	768	342	499	592	317	1546	728	483	331	955	156	1801	406	244	1033	815	1983	1820	1619	9	210	222	708	1608	1747	3427	955	1201	2066	3198	1023	814	1368	312	1013	73	1499	316	125	538	492	3112	764	735	514	1047	943	467
MRTO4	27	122	2	73	116	15	249	93	22	114	407	42	122	83	11	216	95	254	780	384	1	53	27	76	336	274	414	317	293	383	314	297	198	264	148	137	48	116	93	58	135	88	399	102	97	67	134	149	37
AL035413.2	0	0	0	0	0	0	0	0	0	0	0	0	0	0	0	0	0	0	0	13	0	0	5	2	3	1	2	10	0	2	0	1	2	7	2	20	0	0	0	0	0	0	0	2	9	3	8	2	0
AKR7L	5	94	46	72	5	36	110	40	65	9	0	58	25	52	0	15	174	85	40	71	3	4	32	37	73	16	80	139	3	18	54	7	5	59	18	158	21	11	44	42	37	49	22	22	108	35	38	100	22
AKR7A3	15	298	0	686	60	23	403	132	354	6	423	83	57	64	60	43	249	148	71	1260	2	3	38	40	643	315	328	515	7	93	1040	8	11	230	52	194	16	17	58	6	35	160	42	34	217	41	47	281	22
AL035413.1	0	0	0	0	0	0	0	0	0	0	0	0	0	0	0	0	0	0	0	0	0	0	1	2	1	2	0	2	1	0	0	0	0	1	1	5	0	0	0	0	0	0	0	0	5	0	1	1	0
AKR7A2	354	747	510	408	614	150	2189	604	693	274	1079	118	1011	436	208	1091	561	1811	1220	721	4	28	75	149	1288	862	1319	509	829	451	1718	464	384	478	127	376	52	1007	98	34	234	309	1813	118	252	159	134	298	117
RNU6-1099P	0	0	0	0	0	0	0	0	0	0	0	0	0	0	0	0	0	0	0	2	0	0	0	2	0	1	0	6	1	0	0	0	0	1	0	1	0	0	0	0	0	0	0	2	0	0	6	1	0
SLC66A1	43	82	1	66	80	37	133	186	19	35	18	19	190	38	0	104	58	104	71	141	1	15	76	125	151	144	275	142	164	85	240	77	67	86	18	185	1	67	38	7	101	14	160	55	42	24	39	44	9
CAPZB	270	2109	587	594	764	277	2543	969	509	533	977	262	2407	630	693	1694	1677	2207	2290	1761	25	753	345	810	1752	1540	1900	1407	1591	1437	1704	2040	1188	1231	786	1734	78	824	299	175	422	508	2034	437	584	358	689	443	399
RN7SL277P	0	0	0	0	0	0	0	0	0	0	0	0	0	0	0	0	0	0	0	0	5	0	17	4	4	11	10	12	8	46	20	4	0	4	0	4	0	0	0	0	0	0	0	0	0	0	0	0	0
MICOS10	0	20	4	8	1	2	40	52	0	5	0	3	25	17	1	28	25	31	30	195	8	49	23	107	330	266	621	195	248	245	451	316	243	281	110	140	2	24	2	19	5	18	61	139	140	78	186	162	131
RNU4-28P	0	0	0	0	0	0	0	0	0	0	0	0	0	0	0	0	0	0	0	0	0	0	0	0	0	0	0	0	0	0	0	0	0	0	0	1	0	0	0	0	0	0	0	0	1	0	0	0	0
AL031727.2	0	0	0	0	0	0	0	0	0	0	0	0	0	0	0	0	0	0	0	0	0	0	0	0	0	0	0	0	0	0	0	0	1	0	0	0	0	0	0	0	0	0	0	0	0	0	0	0	0
NBL1	1	48	1	1	7	0	15	83	0	0	1	4	42	31	0	2	132	7	11	364	22	29	258	416	2462	1396	1551	1037	493	1327	3107	1616	453	361	199	1106	0	93	0	4	0	14	18	88	49	319	199	90	93
MICOS10-NBL1	0	0	0	0	0	0	0	0	0	0	0	0	0	0	0	0	0	0	0	0	0	0	0	0	0	0	0	0	0	0	0	0	0	0	0	0	0	0	0	0	0	0	0	0	0	0	0	0	0
AL031727.1	8	32	10	21	18	0	30	42	0	9	0	17	75	20	0	28	59	55	122	11	1	8	7	15	6	9	15	12	9	10	4	9	9	5	10	24	6	7	61	19	42	43	55	7	14	11	17	18	2
HTR6	0	1	0	1	0	0	1	0	0	0	0	0	0	0	0	0	0	4	0	0	0	3	0	1	0	0	2	4	0	0	0	0	1	0	7	3	0	0	4	1	0	3	0	0	0	0	1	1	0
TMCO4	11	225	35	46	595	9	140	954	273	259	0	94	201	368	15	198	358	86	100	156	3	111	88	81	205	270	133	174	1051	248	154	494	475	261	44	91	614	91	870	59	417	118	145	14	50	21	134	78	31
RNF186	0	28	0	18	76	13	35	60	1	0	0	1	0	32	0	0	4	1	1	0	0	0	0	0	0	0	0	0	0	0	0	0	0	0	0	0	0	3	4	0	8	1	3	0	0	0	0	0	0
AL391883.1	0	1	0	0	0	0	0	1	0	0	0	0	0	0	0	0	0	0	1	0	0	0	0	0	1	0	0	1	0	0	1	0	0	0	1	0	0	0	0	0	0	8	0	0	0	0	0	0	0
OTUD3	31	238	79	111	195	12	506	156	34	30	26	32	182	72	195	210	125	489	450	252	6	122	84	146	209	273	397	319	233	394	239	257	218	365	130	264	302	42	657	131	384	73	159	174	207	123	497	198	223
PLA2G2E	0	0	0	0	0	0	0	0	0	0	0	0	0	0	0	0	0	0	0	0	0	0	0	0	0	0	0	0	0	0	0	0	0	0	2	0	0	0	0	6	0	8	0	0	0	0	0	0	0
RN7SL304P	0	0	0	0	0	0	0	0	0	0	0	0	0	0	0	0	0	0	0	0	0	0	0	0	0	0	0	1	0	0	0	0	0	0	2	0	0	0	0	0	0	0	0	0	0	0	0	0	0
PLA2G2A	72	244	0	2	1	12	4	127	34	16	17	15	19	180	95	56	343	5	897	9	2	2	0	0	0	120	3	729	0	156	1	32	1	16	38	1	0	1	1	1	5	49	1	1	0	0	0	0	5
PLA2G5	13	11	0	13	12	0	25	12	0	0	0	0	9	2	0	7	6	56	48	175	2	3	4	3	10	31	75	33	0	57	11	20	4	12	93	4	2	1	4	19	3	62	2	10	19	12	51	29	3
PLA2G2D	0	9	0	0	0	2	8	11	0	134	0	2	5	1	0	3	19	36	47	0	0	55	0	0	0	12	0	24	0	1	1	2	0	3	2	3	4	1	0	2	0	14	9	0	1	0	0	0	2
PLA2G2F	0	0	0	0	0	0	0	0	0	0	0	0	0	3	0	0	0	0	0	0	2	0	0	0	0	0	0	1	0	2	2	2	0	0	9	0	0	0	0	10	0	13	0	0	0	0	0	0	1
Z98257.1	0	0	0	0	0	0	0	0	0	0	0	0	0	0	0	0	0	0	0	0	0	0	1	0	0	3	0	1	0	0	0	0	0	1	2	1	0	0	0	0	0	0	0	0	0	0	0	0	0
PLA2G2C	0	9	0	0	0	0	3	3	0	0	0	0	0	0	0	0	4	0	0	0	2	2	1	0	0	3	0	1	0	0	0	0	0	1	1	1	2	0	0	5	0	20	0	0	0	0	2	0	0
UBXN10-AS1	0	0	0	0	0	0	0	0	0	0	0	0	0	0	0	0	0	0	0	2	0	1	0	0	2	0	5	1	8	0	8	5	0	0	0	2	0	0	0	0	0	0	0	3	0	0	0	0	0
UBXN10	7	42	8	15	3	71	62	17	0	0	0	1	52	0	205	1	15	39	5	35	0	2	11	60	152	100	273	18	266	14	234	252	369	194	18	50	4	39	44	30	33	33	105	48	19	25	52	44	34
LINC01757	0	0	0	0	0	0	0	0	0	0	0	0	0	0	0	0	0	0	0	0	0	0	0	0	0	0	0	0	0	0	0	0	0	0	0	1	0	0	0	0	0	0	0	0	0	0	0	0	0
Z98257.2	0	0	0	0	0	0	0	0	0	0	0	0	0	0	0	0	0	0	0	0	1	0	0	0	0	0	1	0	0	0	0	0	0	1	7	1	0	0	0	0	0	0	0	0	0	0	0	0	0
VWA5B1	0	23	22	1	316	0	12	1826	173	0	128	0	1	5	0	0	938	8	31	11	2	3	59	48	9	10	63	0	0	21	14	11	36	15	14	4	6	12	228	283	80	86	200	78	27	16	88	36	4
AL020998.1	0	0	0	0	0	0	0	0	0	0	0	0	0	0	0	0	0	0	0	0	0	1	0	0	0	1	0	0	0	0	0	0	0	0	0	0	0	0	0	0	0	0	0	0	0	0	0	0	0
LINC01141	0	0	0	0	0	0	2	0	0	0	0	0	0	0	0	0	0	0	0	2	0	0	4	0	1	0	0	1	0	0	1	1	1	2	8	0	0	0	0	0	0	1	0	0	3	0	1	0	2
AL139254.1	0	0	0	0	0	0	0	0	0	0	0	0	0	0	0	0	0	0	0	0	0	0	0	0	0	0	0	0	0	0	0	0	0	0	0	0	0	0	0	0	0	0	0	0	0	0	0	0	0
AL139254.2	0	0	0	0	0	0	0	0	0	0	0	0	0	0	0	0	0	0	0	0	1	0	0	0	0	0	0	0	0	0	0	0	0	0	1	0	0	0	0	0	0	0	0	0	0	0	0	0	1
AL139254.3	0	0	0	0	0	0	0	0	0	0	0	0	0	0	0	0	0	0	0	0	0	0	0	0	0	0	0	0	0	0	0	1	0	0	1	0	0	0	0	0	0	0	0	0	0	0	2	0	0
CAMK2N1	133	340	179	201	399	58	667	753	134	24	163	35	573	102	169	11	325	459	36	137	1	5	48	88	70	107	90	76	4	44	84	114	23	94	73	11	2	34	64	31	41	9	387	35	12	2	413	15	32
MUL1	16	110	41	11	74	6	144	103	4	1	3	20	96	45	19	107	68	138	131	308	1	32	27	167	263	381	625	228	467	297	614	350	257	223	55	199	1	69	10	39	25	34	195	76	81	77	67	111	61
RPS4XP4	0	0	0	0	0	0	0	0	0	0	0	0	0	0	0	0	0	0	0	0	0	0	0	0	0	1	0	0	1	0	0	0	1	1	0	0	0	0	0	0	0	11	0	0	0	0	0	0	0
FAM43B	0	1	0	5	0	0	0	0	0	0	0	0	0	0	0	0	0	0	0	13	1	0	0	6	0	14	2	9	1	18	4	3	5	3	2	1	0	0	0	0	0	1	0	0	0	3	0	1	2
CDA	7	42	0	47	11	5	4	5	0	0	0	2	18	6	0	6	62	14	10	28	0	1	2	1	11	16	23	7	32	17	11	24	2	7	13	5	0	2	12	16	8	70	26	1	0	0	1	3	0
PINK1	268	1238	317	312	501	350	1163	859	83	317	283	68	906	143	107	791	724	884	464	1738	10	38	305	510	1665	1582	2682	784	2625	1122	2666	1336	990	1041	341	793	55	1248	271	162	388	327	2578	222	255	255	170	580	152
MIR6084	0	0	0	0	0	0	0	0	0	0	0	0	0	0	0	0	0	0	0	0	0	0	0	0	0	0	0	0	0	0	0	0	0	0	0	0	0	0	0	0	0	0	0	0	0	0	0	0	0
PINK1-AS	28	102	30	67	40	45	266	34	10	2	45	5	188	15	3	211	105	276	37	158	10	64	36	142	200	169	314	92	137	97	250	194	218	162	46	185	6	55	10	25	22	51	53	49	57	27	52	84	99
DDOST	574	1441	1176	587	881	309	3376	1465	447	661	1989	210	2664	970	143	4237	1073	2704	2540	2379	19	153	158	671	2908	2400	5678	1454	2932	3778	4221	1748	2006	1684	281	838	41	2643	129	229	596	518	4429	564	453	399	427	1242	236
KIF17	12	20	49	67	0	4	67	46	22	1	1	5	14	6	0	68	10	101	20	10	0	2	29	5	10	18	30	58	39	13	24	86	31	15	8	15	27	24	142	174	23	146	64	0	10	2	1	6	0
AL663074.2	0	0	0	0	0	0	0	0	0	0	0	0	0	0	0	0	0	0	0	0	4	0	0	0	1	1	0	0	0	0	0	3	0	0	0	0	0	0	0	0	0	0	0	0	0	0	0	0	0
SH2D5	0	1	0	0	0	0	0	0	0	0	0	0	0	0	0	3	0	0	8	0	3	1	1	6	5	6	9	7	42	3	12	12	14	6	4	3	0	0	0	4	0	5	0	1	0	0	0	0	1
AL663074.1	0	0	0	0	0	0	0	0	0	0	0	0	0	0	0	0	0	0	0	0	0	0	0	0	0	0	0	0	0	0	0	0	0	0	0	0	0	0	0	0	0	0	0	0	0	0	0	0	0
HP1BP3	652	2117	390	792	1946	516	5401	1788	1032	923	2106	837	2875	1174	857	4559	2300	4679	3423	2619	32	1371	1291	1663	3688	3032	3960	2121	3630	2557	3220	4412	3697	3427	1247	2417	2496	558	4123	641	2484	539	1790	1491	1529	844	1949	1724	863
EIF4G3	1890	3935	1125	1816	2764	1009	7834	3461	793	898	2447	935	8084	1560	1578	7275	3468	6827	6794	1972	25	616	558	1492	2745	1986	3559	1406	2923	1688	2969	2252	2405	2493	779	2070	576	673	2235	329	2215	904	3069	1003	1076	678	1549	1252	551
RNU7-200P	0	0	0	0	0	0	0	0	0	0	0	0	0	0	0	0	0	0	0	0	0	0	0	0	0	0	0	0	0	0	0	0	0	0	0	0	0	0	0	0	0	1	0	0	0	0	0	0	0
MIR1256	0	0	0	0	0	0	0	0	0	0	0	0	0	0	0	3	0	0	0	5	0	1	0	7	0	0	1	1	0	1	1	0	0	0	0	5	0	0	0	0	0	0	0	2	2	2	4	7	6
RPS15AP6	4	5	0	3	1	1	9	7	10	0	0	5	9	1	0	40	9	6	7	15	0	3	0	11	7	1	4	8	2	3	1	3	5	8	4	21	0	0	0	0	0	3	0	8	19	6	15	16	19
AL627311.1	1	7	0	5	19	0	5	11	0	0	0	2	12	9	0	16	11	8	11	8	0	2	0	3	1	0	2	0	2	0	0	2	3	1	0	5	0	0	0	0	0	4	0	4	6	5	8	7	6
HSPE1P27	0	0	0	0	0	0	0	0	0	0	0	0	0	0	0	0	0	0	0	0	0	0	0	0	0	0	0	0	0	0	0	0	0	0	2	0	0	0	0	0	0	0	0	0	0	0	0	0	0
AL031005.2	0	0	0	0	0	0	0	0	1	0	0	0	0	0	0	0	0	0	1	4	1	1	2	3	4	2	3	0	1	1	1	7	2	2	1	5	0	0	0	0	0	0	0	1	1	2	2	1	0
ECE1	1311	2847	507	1452	1602	435	2167	2487	1023	914	712	136	3272	780	812	935	2571	1547	1539	5531	24	499	1081	3329	4157	4928	7394	2274	2629	2467	7603	3891	1356	3416	1199	4565	1988	1557	2820	489	2006	1359	5678	800	449	594	348	619	328
AL031005.1	0	0	0	0	0	0	0	0	0	0	0	0	0	0	0	0	0	0	0	0	0	0	0	1	0	0	0	0	0	2	1	0	0	2	0	0	0	0	0	0	0	0	0	1	0	0	0	0	0
ECE1-AS1	0	1	0	0	0	0	1	0	2	0	0	0	1	1	0	0	0	1	1	6	1	10	4	2	2	4	2	8	1	1	1	6	0	0	2	1	0	0	0	0	0	6	1	0	0	0	0	0	0
PPP1R11P1	0	0	0	0	0	0	1	0	0	0	0	0	0	0	0	0	0	0	0	0	0	0	2	3	1	0	0	0	5	2	0	2	0	0	1	0	0	0	0	0	0	3	0	0	0	0	0	0	0
AL592309.1	0	0	0	0	0	0	0	0	0	0	0	0	0	0	0	0	0	0	0	0	0	0	0	0	0	0	0	0	0	0	0	1	0	0	2	0	3	0	0	4	0	14	0	0	0	0	0	0	0
AL592309.2	0	0	0	0	0	0	0	0	0	0	0	0	0	0	0	0	0	0	0	0	0	0	0	1	0	0	0	0	0	0	0	0	0	0	2	0	0	0	0	0	0	0	0	0	0	0	0	0	0
NBPF2P	3	10	15	1	24	14	214	171	0	148	5	35	70	34	2	343	16	120	30	3	0	6	4	4	0	6	8	7	7	0	6	12	5	5	1	9	75	18	37	97	57	222	33	5	4	4	7	13	0
HS6ST1P1	0	0	2	0	0	0	1	0	0	0	0	0	0	0	0	1	0	0	0	0	0	0	0	1	6	2	0	0	2	9	7	1	0	0	0	0	0	1	0	4	0	5	4	0	0	0	0	0	0
CROCCP5	0	0	0	0	0	0	0	0	0	0	0	0	0	0	0	0	0	0	0	0	0	0	1	2	0	0	0	1	1	0	0	1	0	0	2	1	0	0	0	5	0	0	0	0	1	0	0	0	0
NBPF3	138	962	572	84	341	170	2320	422	822	45	652	308	1198	405	26	1366	748	1628	1494	119	4	35	57	70	207	124	163	117	211	154	297	124	83	147	23	222	718	250	632	302	1148	878	917	153	117	87	100	154	36
PFN1P10	0	0	0	0	0	0	0	0	0	0	0	0	0	0	0	0	0	0	0	0	0	0	0	0	0	0	1	0	0	0	0	0	0	0	2	0	0	0	0	0	0	0	0	0	0	0	0	0	1
ALPL	28	56	44	12	41	0	44	14	0	8	71	3	33	27	0	444	34	19	181	64	2	63	23	30	41	47	117	76	74	177	29	93	25	50	62	166	9	9	9	36	6	117	55	1	2	4	1	18	3
LINC02596	0	0	0	0	0	0	0	0	0	0	0	0	0	0	0	0	0	0	0	0	0	0	0	0	0	0	0	0	1	1	0	0	0	0	2	1	0	0	0	0	0	0	0	0	0	1	0	0	0
RAP1GAP	325	2273	682	1153	3260	354	1925	3604	1705	33	342	1114	4593	178	774	300	2584	1311	407	1262	21	4	559	901	2288	998	2894	334	7793	690	2286	3628	3780	1845	152	1952	291	1674	926	255	94	620	4083	218	258	279	275	484	270
USP48	711	2025	776	887	2199	572	5001	1794	776	930	1581	603	2761	860	1454	1713	2205	5258	3670	736	21	653	226	709	1027	930	1561	811	812	726	1183	1153	881	1321	348	1027	285	407	345	99	877	376	1788	800	809	325	936	808	339
AL590103.1	0	0	0	0	0	0	0	0	0	0	0	0	0	0	0	0	0	0	0	0	0	0	0	0	0	0	0	0	0	0	0	0	0	0	1	0	0	0	0	0	0	0	0	0	0	0	0	0	0
LDLRAD2	2	12	0	1	12	1	9	9	0	6	2	0	12	11	21	6	26	3	19	0	0	4	0	4	2	5	8	3	2	19	3	2	1	4	4	4	6	5	4	8	3	58	2	0	1	0	1	3	0
HSPG2	580	16359	2475	1490	5454	1644	7115	4680	1673	1776	902	337	8444	4002	2424	5435	6914	2862	5967	25145	40	606	3737	3182	1457	16411	3097	7025	4728	6241	2825	15184	2688	2159	3234	2651	341	2830	3712	278	5081	1000	4881	45	260	160	485	612	487
AL590556.1	0	0	1	0	0	0	0	10	0	2	0	0	0	0	0	1	3	0	0	0	0	0	0	0	0	1	1	0	1	3	0	0	0	0	1	0	6	0	0	7	0	22	0	0	0	0	0	1	0
AL590556.2	0	0	0	0	0	0	0	0	0	0	0	0	0	0	0	0	0	0	0	0	0	1	0	0	0	0	3	0	0	1	0	0	2	0	4	0	0	0	0	0	0	0	0	0	1	1	2	2	0
CELA3B	8	7	36542	0	0	0	49361	0	1	0	0	0	16	0	0	0	0	0	0	0	0	0	0	0	0	0	0	0	0	0	0	0	0	0	0	0	659	0	3360	20	2	49	43	0	0	0	0	0	0
AL590556.3	0	0	1053	0	0	0	3847	0	0	0	0	0	2	0	0	0	0	0	0	0	0	0	0	0	0	0	0	0	0	0	0	0	0	0	1	0	206	0	1200	1	0	0	4	0	0	0	0	0	0
RN7SL386P	0	0	7	0	0	0	0	0	0	0	0	0	0	0	0	0	0	0	0	0	1	0	0	0	0	0	0	0	0	0	0	0	0	0	0	0	0	0	0	0	0	0	0	0	0	0	0	0	0
RNU6-1022P	0	0	4	0	0	0	1	0	0	0	0	0	0	0	0	0	0	0	0	0	0	0	0	0	0	0	0	0	0	0	0	0	0	0	0	0	0	0	0	0	0	0	0	0	0	0	0	0	0
CELA3A	22	26	60520	0	0	0	92875	0	0	1	37	0	40	7	0	0	3	0	0	0	0	0	0	0	0	0	0	0	0	0	0	0	0	0	1	0	2035	8	10150	58	11	47	194	0	0	0	0	0	0
RN7SL186P	0	0	10	0	0	0	2	0	0	0	0	0	0	0	0	0	0	0	0	0	0	0	0	0	0	0	0	0	0	0	0	0	0	0	0	0	0	0	0	0	0	0	0	0	0	0	0	0	0
RNU6-776P	0	0	0	0	0	0	1	0	0	0	0	0	0	0	0	0	0	0	0	0	0	0	0	0	0	0	0	0	0	0	0	0	0	0	0	0	0	0	0	0	0	0	0	0	0	0	0	0	0
LINC01635	0	0	0	0	0	0	0	0	0	0	0	0	0	0	0	0	0	0	0	0	0	0	1	0	1	1	0	0	0	0	0	0	0	6	3	0	0	0	0	0	0	0	0	0	0	0	0	0	0
LINC00339	2	0	1	1	2	0	15	3	0	0	1	2	3	28	0	2	2	6	0	41	2	27	33	46	62	61	123	92	57	61	76	83	57	47	15	64	0	0	0	0	0	1	0	55	37	26	78	55	59
CDC42	366	1791	191	538	797	319	4697	685	585	648	1282	185	2425	527	884	1114	1053	2821	1977	2012	38	659	154	546	2642	1653	2933	1561	1353	2224	2201	2001	1570	1896	1020	719	22	760	131	258	135	443	2257	1250	1280	766	2113	1781	1246
CDC42-AS1	0	0	0	0	0	0	0	0	0	0	0	0	0	0	0	0	0	0	0	0	1	0	0	0	1	1	0	0	0	2	1	0	0	2	6	1	0	0	0	0	0	0	0	0	1	1	1	0	0
AL031281.1	0	0	0	0	0	0	0	0	0	0	0	0	0	0	0	0	0	0	0	0	0	0	0	0	0	0	0	0	0	0	0	0	0	0	0	0	0	0	0	0	0	0	0	0	0	0	0	0	0
CDC42-IT1	0	3	1	3	1	0	8	4	4	1	1	0	2	10	0	7	0	6	3	8	0	21	2	14	3	6	8	17	2	9	1	11	4	9	2	24	0	0	0	0	0	0	0	5	25	16	51	13	9
MPHOSPH6P1	0	0	0	0	0	0	0	0	0	0	0	0	0	0	0	0	0	0	0	0	1	0	0	0	0	0	0	0	0	0	0	0	0	0	4	0	0	0	0	0	0	0	0	0	0	0	0	0	0
WNT4	13	374	1705	445	839	77	144	668	373	0	85	0	19	82	223	15	438	178	48	88	3	0	30	156	64	228	715	153	33	353	441	37	28	216	42	337	12	9995	471	174	275	57	3513	40	9	5	19	20	9
AL445253.1	0	0	0	0	0	0	0	3	0	0	0	3	0	0	0	0	1	0	0	2	1	0	1	2	3	7	6	3	6	11	15	2	6	6	3	15	0	1	0	0	0	0	1	6	1	0	4	0	3
MIR4418	0	0	0	0	0	0	0	0	0	0	0	0	0	0	0	0	0	0	0	0	0	0	0	0	2	0	0	1	0	0	0	1	0	0	2	2	0	0	0	0	0	0	0	0	0	0	0	0	0
PPIAP34	0	3	0	0	0	0	3	0	0	0	1	0	0	0	0	4	2	2	1	0	0	0	1	1	5	5	2	1	3	2	0	2	3	6	1	2	5	0	0	6	0	25	0	0	0	0	0	1	0
AL591122.1	0	0	0	0	0	0	0	0	0	0	0	0	0	0	0	0	0	0	0	0	0	0	0	0	0	0	0	0	0	0	0	0	0	0	4	0	0	0	0	0	0	0	0	0	0	0	0	0	0
ZBTB40	338	1472	187	558	965	327	2962	1451	276	262	855	152	2244	347	1443	827	1673	3226	1687	865	7	612	403	601	921	982	1386	784	1211	724	1093	850	858	837	316	1138	548	349	833	169	1081	643	1773	570	477	350	847	592	184
ZBTB40-IT1	0	0	0	0	0	0	1	0	0	0	0	0	0	0	0	1	0	0	0	4	1	2	2	12	3	4	3	4	0	2	1	8	2	5	8	9	0	0	0	0	0	0	0	10	7	3	30	3	10
EPHA8	0	0	8	1	0	3	60	0	0	0	0	0	450	1	0	4	0	79	69	68	1	0	37	8	24	6	28	0	0	28	47	4	0	16	12	67	5	1	12	8	9	33	1	0	4	1	9	36	0
MIR6127	0	0	0	0	0	0	0	0	0	0	0	0	0	0	0	0	0	0	0	0	0	0	0	0	0	0	0	0	0	0	0	1	0	0	0	0	0	0	0	0	0	0	0	0	0	0	0	0	0
C1QA	123	521	37	171	234	100	516	375	171	791	485	54	614	111	179	377	564	758	1585	969	31	171	104	86	128	969	414	1429	220	626	250	947	105	322	386	68	2	35	22	194	117	60	358	15	110	22	39	85	14
C1QC	102	289	83	113	74	38	393	77	104	449	52	12	496	101	22	262	250	526	741	1285	24	208	211	133	103	657	420	1076	153	423	227	677	57	486	497	145	2	12	22	86	41	26	216	5	71	27	38	62	23
C1QB	147	525	184	264	207	82	677	375	111	757	130	71	843	227	101	402	524	1034	1879	1517	35	172	165	167	190	831	658	1463	232	698	310	980	88	918	1086	113	8	16	51	264	149	67	399	19	142	49	94	98	31
EPHB2	15	281	0	66	121	108	355	114	54	162	58	137	19	707	3	275	182	197	850	822	2	22	161	192	442	469	419	203	622	307	501	574	409	579	88	500	63	42	105	79	79	259	297	86	221	18	57	134	51
MIR4684	0	0	0	0	0	0	0	0	0	0	0	0	0	0	0	0	0	0	0	0	0	0	0	1	0	0	0	0	0	0	0	0	0	0	0	0	0	0	0	0	0	0	0	0	3	0	0	1	0
AL512444.1	0	0	0	0	0	0	0	0	0	0	0	0	0	0	0	0	0	0	0	0	0	0	0	0	0	0	0	0	0	0	0	0	0	0	0	0	0	0	0	0	0	0	0	0	0	0	0	0	0
MIR4253	0	0	0	0	0	0	0	0	0	0	0	0	0	2	0	0	0	0	0	0	0	0	0	0	0	0	0	0	0	0	0	0	0	0	0	0	0	0	0	4	0	10	0	0	0	0	0	0	0
LACTBL1	0	0	0	0	0	0	0	0	0	0	0	0	0	0	0	0	0	0	1	0	0	0	0	0	0	0	0	0	0	0	0	0	0	0	0	0	1	0	0	3	0	3	0	0	0	0	0	0	0
TEX46	0	0	0	0	0	0	0	0	0	0	0	0	0	0	0	0	3	2	8	2	0	0	3	1	1	0	1	1	0	2	0	0	0	0	2	0	0	0	3	2	0	6	1	0	1	0	0	0	0
KDM1A	776	1784	418	850	1011	224	2465	925	843	695	3545	199	1780	533	585	1829	1467	1502	6815	1296	11	243	202	491	1785	1145	2288	507	1445	1566	1901	1282	1070	1597	412	804	204	717	387	138	604	464	2624	677	646	343	984	852	240
AL031428.1	0	0	0	0	0	0	0	0	0	0	0	0	0	0	0	0	0	0	0	0	0	0	0	0	0	0	0	0	0	0	0	0	0	0	1	1	0	0	0	0	0	0	0	0	0	0	0	0	0
MIR3115	0	4	0	0	0	0	1	0	0	0	0	0	3	0	0	1	5	1	2	3	0	0	0	0	0	0	0	0	0	1	0	0	0	0	0	0	0	0	0	0	0	4	0	2	0	1	0	1	0
AL031428.2	0	0	0	0	0	0	0	0	0	0	0	0	0	0	0	0	0	0	0	0	0	0	0	0	0	1	0	0	0	0	0	0	0	0	0	2	0	0	0	0	0	0	0	0	0	0	0	0	0
LUZP1	147	622	159	148	380	55	483	379	184	94	214	47	337	165	754	256	581	285	810	1032	14	289	130	291	527	1020	796	661	1079	1104	486	1112	681	609	610	240	100	60	322	38	165	137	146	123	205	148	519	510	170
AL161672.1	0	0	0	0	0	0	0	0	0	0	0	0	0	0	0	0	0	0	0	0	0	0	0	0	0	0	0	0	0	0	0	0	0	0	0	0	0	0	0	0	0	0	0	0	0	0	0	0	0
RNU6-514P	0	0	0	0	0	0	0	0	0	0	0	0	0	0	0	0	0	0	0	0	0	0	0	0	0	0	0	0	0	0	0	0	0	0	0	0	0	0	0	0	0	0	0	0	0	0	0	0	2
RNU6-135P	0	0	0	0	0	0	0	0	0	0	0	0	0	0	0	0	0	0	0	0	0	0	0	0	0	0	0	0	0	0	0	0	0	0	0	0	0	0	0	0	0	0	0	0	0	0	0	0	0
HTR1D	4	53	0	0	163	0	36	11	36	0	0	20	0	61	0	4	121	29	0	2	0	0	0	3	0	1	0	2	1	0	0	1	0	1	1	3	4	0	0	10	0	36	87	0	0	0	5	0	0
AL109936.2	0	0	0	0	0	0	0	1	0	0	0	0	0	0	0	1	0	0	0	0	0	0	0	0	0	0	1	0	1	0	0	0	0	0	0	0	0	0	0	5	0	10	0	0	0	0	0	0	0
LINC01355	1	1	57	1	1	0	14	0	5	1	3	2	1	7	0	15	3	4	5	83	2	203	15	290	103	64	85	106	35	125	61	155	198	243	55	370	0	0	0	0	0	0	1	380	265	195	401	356	187
AL109936.8	0	0	0	0	0	0	0	0	0	0	0	0	0	0	0	0	0	0	0	0	0	0	0	0	0	0	0	0	0	0	0	0	0	0	0	0	0	0	0	0	0	0	0	1	1	0	0	0	0
HNRNPR	681	2301	647	798	2214	639	3115	1525	575	1099	4576	685	3063	978	1490	3406	2304	2576	8752	1374	12	723	301	871	2750	1627	3070	1140	1519	2065	2244	2302	2034	2926	1073	811	785	843	1457	203	1467	507	3281	1381	1108	702	1826	1457	840
ZNF436	57	286	0	79	317	24	288	335	49	223	105	25	262	114	572	467	159	194	399	193	5	61	50	93	656	505	243	470	374	449	630	1112	771	363	119	208	74	66	268	20	221	58	205	202	148	69	186	217	111
ZNF436-AS1	6	27	5	0	20	3	18	15	7	0	0	0	16	3	0	52	30	27	13	13	1	14	2	27	33	27	18	18	76	22	38	89	105	28	12	43	0	4	0	5	1	73	16	22	13	10	29	28	17
AL109936.1	0	0	0	0	0	0	0	0	0	0	0	0	0	0	0	0	0	0	0	0	0	0	0	0	0	0	0	0	0	0	0	0	0	0	0	0	0	0	0	0	0	0	0	0	0	0	0	0	0
AL109936.3	0	0	0	0	0	1	4	0	10	0	1	0	0	2	0	1	0	0	0	2	0	0	1	0	12	4	6	1	8	8	20	6	9	4	0	6	0	0	0	0	0	0	0	0	1	4	1	1	3
TCEA3	117	478	206	181	441	36	1436	445	123	49	384	126	63	504	202	185	466	371	80	150	4	67	33	143	779	484	228	221	979	652	1016	920	978	279	59	397	3443	21	3222	92	1586	134	130	59	5	88	9	98	32
AL357134.1	0	0	0	0	0	0	0	0	0	0	0	0	0	0	0	3	0	0	0	0	0	0	0	0	0	0	0	0	0	0	0	0	0	0	0	0	0	0	0	0	0	0	0	0	0	0	0	0	0
ASAP3	26	219	28	89	206	8	245	290	36	4	22	9	32	58	36	626	230	59	312	91	4	13	25	148	385	531	102	321	1315	373	447	994	915	262	20	169	278	29	317	35	52	140	104	37	15	23	16	91	44
E2F2	2	5	0	0	10	0	5	2	0	47	0	9	4	54	0	7	13	9	116	10	2	22	7	1	5	12	2	26	3	40	11	30	3	8	9	10	0	0	6	5	0	12	1	2	6	2	24	1	1
AL021154.1	0	0	0	0	0	0	0	0	0	0	0	0	0	0	0	0	0	0	0	2	0	2	0	0	1	4	3	1	1	3	1	1	2	1	0	0	0	0	0	0	0	0	0	1	0	0	0	0	0
ID3	5	62	13	29	76	20	104	62	0	26	0	2	61	136	0	20	38	49	642	899	11	68	408	266	1626	1567	392	629	4250	424	1496	2398	1158	350	53	635	5	15	22	23	10	18	41	48	30	153	20	121	65
AL450043.1	0	0	0	0	0	0	0	0	0	0	0	0	0	0	0	0	0	0	0	0	2	3	1	0	2	2	0	0	0	0	2	0	0	1	2	0	0	0	0	0	0	0	0	1	0	1	0	0	0
MDS2	0	6	0	3	3	26	27	2	0	0	0	1	9	1	160	2	0	36	10	2	0	17	4	2	6	2	6	1	35	2	5	17	16	5	8	3	7	0	0	16	2	62	2	1	0	1	2	4	1
AL451000.1	0	0	0	0	0	0	0	1	0	0	0	0	0	0	0	0	0	0	0	0	1	1	0	0	0	0	0	0	1	0	0	0	0	0	1	0	0	0	0	0	0	0	0	0	0	0	0	0	0
RPL11	6928	8623	8026	4169	3292	2316	24566	2469	2620	3224	11929	4988	14131	3479	7350	8952	8411	8609	33835	4319	104	1301	305	609	8369	5523	7711	2904	8840	5378	6612	10798	7617	6256	3435	894	508	8845	1995	3983	1449	4632	51876	1811	1053	1040	1032	2201	701
ELOA-AS1	0	1	0	0	0	0	0	1	0	2	0	0	0	4	0	0	0	0	0	30	1	13	8	36	47	29	58	17	47	39	56	30	31	21	8	45	0	0	0	0	0	0	1	24	30	21	31	30	15
ELOA	410	1026	174	380	608	535	1195	512	135	174	466	127	1097	307	251	343	713	646	1843	771	13	161	153	410	1068	959	1559	545	1356	1021	1107	1269	883	943	466	558	176	466	461	94	331	247	1056	297	308	255	565	382	290
PITHD1	97	320	114	121	110	130	481	78	40	95	395	61	402	63	7	198	185	286	467	375	9	90	58	165	877	517	1174	245	500	639	1094	559	402	475	191	261	4	222	28	37	57	109	477	265	197	168	223	352	219
LYPLA2	54	214	47	97	135	63	182	243	83	60	439	55	405	133	89	239	146	115	368	227	1	65	35	86	228	219	336	131	352	223	276	269	196	142	46	162	33	326	156	43	168	30	634	38	37	30	58	68	31
GALE	25	96	0	64	123	80	112	86	16	21	65	41	325	133	13	119	97	63	127	142	0	10	20	64	146	148	184	51	69	300	154	64	35	55	26	107	26	64	58	25	41	117	240	13	30	19	89	47	3
HMGCL	107	425	105	149	391	80	501	509	493	338	115	95	549	220	322	247	480	305	288	353	3	54	43	132	493	458	556	188	1184	318	621	518	479	339	62	290	131	225	123	73	158	218	664	128	125	75	98	160	48
FUCA1	226	562	111	349	308	167	613	254	125	106	1138	48	693	172	283	551	356	431	686	754	6	180	49	322	1882	1633	3187	499	1643	1661	2451	1257	1299	1008	212	327	19	1582	37	199	261	357	1083	625	235	273	126	661	159
CNR2	0	0	0	0	0	0	6	0	3	0	0	0	2	0	0	2	6	8	9	2	0	101	0	1	11	2	0	20	21	0	1	24	4	2	2	4	2	0	0	1	1	6	0	0	0	2	1	0	1
BTBD6P1	0	2	0	0	0	13	2	0	2	22	0	0	7	4	0	0	15	11	16	0	0	39	1	0	0	1	1	2	2	0	1	4	0	0	0	1	5	0	2	8	1	18	0	0	0	0	0	0	0
AL590609.2	0	0	0	0	0	0	0	0	0	0	0	0	0	0	0	0	0	0	0	0	0	0	0	0	0	0	0	0	0	0	0	0	0	0	0	0	0	0	0	0	0	0	0	0	0	0	0	0	0
MIR378F	0	0	0	0	0	0	0	0	0	0	0	0	0	0	0	0	0	0	0	0	0	0	0	0	0	0	0	0	0	0	0	0	0	0	0	0	0	0	0	0	0	0	0	0	0	0	0	0	0
H3P1	0	0	0	0	0	0	0	0	0	1	0	0	1	0	0	0	0	0	0	0	0	0	0	0	1	3	4	1	3	1	4	1	1	1	2	1	0	0	0	0	0	0	1	0	1	1	0	1	2
PNRC2	549	673	595	286	130	556	1489	108	53	28	851	76	973	68	670	993	800	483	995	759	12	176	54	164	1398	643	763	364	799	704	831	1102	1127	1044	317	132	18	117	22	21	8	62	245	734	357	180	509	455	546
SRSF10	322	612	415	320	428	161	1239	345	500	470	936	253	1057	396	236	1080	676	831	1872	1087	10	743	218	761	1721	1231	2065	737	999	1588	1545	1530	1735	1893	719	856	997	238	836	78	813	128	743	1625	879	583	1092	1144	738
AL590609.1	0	0	0	0	0	0	0	0	0	0	0	0	0	0	0	0	0	0	0	0	0	0	0	0	0	0	0	0	0	0	0	0	0	1	1	0	0	0	4	0	0	0	0	0	0	0	0	0	0
AL591178.1	0	0	0	0	2	0	0	16	0	0	0	0	0	0	0	0	3	0	0	0	0	0	0	0	0	0	0	0	1	0	0	0	0	0	1	0	0	0	0	5	0	15	0	0	0	0	0	0	1
MYOM3	6	2353	7	1900	1786	4	26	4714	1416	1	0	38	7	26	949	5	2017	3	15	112	2	0	22	6	9	35	49	11	13	86	11	13	7	18	56	16	36	0	86	32	0	127	1	0	5	3	2	11	0
MYOM3-AS1	0	0	0	0	0	0	0	0	0	0	0	0	0	0	0	0	0	0	0	0	1	0	0	0	0	0	0	0	0	0	0	0	0	0	1	0	0	0	0	0	0	0	0	0	0	0	0	0	0
IL22RA1	19	305	155	452	439	15	411	681	430	15	12	7	0	26	90	10	490	6	0	0	1	0	0	1	16	17	1	2	75	0	15	33	57	4	2	7	455	0	216	20	0	22	1	0	0	0	0	3	1
IFNLR1	22	89	98	25	140	9	45	221	43	68	13	8	100	23	1	9	96	17	23	129	4	40	43	59	195	166	230	27	188	17	154	150	143	121	34	115	29	31	89	40	22	32	45	49	49	45	18	41	26
LINC02800	0	0	0	0	0	0	0	0	0	0	0	0	0	2	0	0	0	0	0	0	0	0	0	0	0	0	0	0	0	0	0	0	0	0	1	0	0	0	0	0	0	0	0	0	0	0	1	0	0
GRHL3-AS1	0	0	0	0	0	0	0	0	0	0	0	0	0	0	0	0	0	0	0	0	0	0	0	3	0	1	1	0	0	0	1	1	0	3	0	0	0	0	0	0	0	0	0	0	1	0	0	3	1
GRHL3	0	4	0	8	20	11	5	3	0	0	0	0	12	33	0	8	1	1	20	20	0	3	12	8	2	13	7	2	0	9	8	3	0	21	13	6	11	0	6	29	3	70	20	1	7	0	2	5	0
STPG1	62	91	108	3	31	10	283	62	71	2	78	18	224	26	2	67	46	141	84	77	2	12	14	66	102	146	175	68	151	69	170	136	95	121	36	92	13	35	34	41	23	60	100	68	36	46	60	64	42
NIPAL3	59	446	251	213	189	83	376	271	195	176	313	38	375	89	68	271	323	188	193	747	6	254	59	305	1092	931	1294	303	2230	908	1333	1172	1381	919	178	647	19	159	57	23	105	79	259	356	420	272	568	593	362
RCAN3AS	0	0	0	0	0	0	0	0	0	0	0	0	0	1	0	0	0	0	0	16	0	6	2	4	13	11	24	3	8	6	22	5	1	11	0	15	0	0	0	0	0	0	0	5	6	4	5	4	0
RCAN3	204	620	216	478	634	52	287	1102	297	36	213	18	410	180	280	62	443	123	87	888	23	904	133	363	1406	1052	1881	607	1012	751	2275	973	1296	1669	405	516	38	138	83	30	142	39	297	653	630	394	710	752	709
NCMAP-DT	0	0	0	0	0	0	0	0	0	0	0	0	0	0	0	0	0	0	0	10	0	0	0	2	3	1	1	0	12	0	0	9	12	4	4	1	0	0	0	0	0	0	0	1	4	0	3	2	1
NCMAP	13	23	11	0	25	6	51	61	0	0	0	0	79	31	0	19	27	0	15	140	1	0	19	18	118	62	472	3	294	390	56	187	144	158	38	20	4	20	14	6	0	17	71	63	173	3	93	224	87
AL445686.1	0	0	0	0	0	0	0	0	0	0	0	0	0	0	0	0	0	0	0	2	1	0	0	2	0	0	3	1	0	2	0	1	0	9	8	1	0	0	0	0	0	0	0	2	4	0	6	2	2
AL445686.2	0	0	0	0	0	0	0	0	0	0	0	0	0	0	0	0	0	0	0	0	0	0	0	0	0	0	0	0	0	0	0	0	0	0	0	0	0	0	0	0	0	0	0	0	0	0	0	0	0
SRRM1	2722	5146	1138	2528	2486	904	6212	2893	1454	1023	3154	1298	6655	1591	1496	3345	4972	3464	5493	1103	22	547	551	822	671	931	1219	640	610	794	785	1192	778	1240	641	845	1634	1271	6126	1315	6448	746	3183	486	544	274	784	405	516
AL445648.1	0	0	0	0	0	0	0	0	0	0	0	0	0	0	0	0	0	0	0	0	0	0	0	0	0	0	0	0	0	0	0	0	0	0	1	0	0	0	0	0	0	0	0	0	0	0	0	0	2
CLIC4	147	1501	3	140	196	187	597	183	50	338	424	69	458	185	850	711	619	252	888	1874	48	100	208	375	1433	2538	1595	1709	806	3459	1573	3327	1033	1474	3421	176	24	27	18	57	37	90	90	705	484	367	777	809	372
RNU6-1208P	0	0	0	0	0	0	0	0	0	0	0	0	0	0	0	0	0	0	0	0	0	0	0	0	0	0	0	0	0	0	0	0	0	0	0	0	0	0	0	0	0	0	0	0	0	0	0	0	0
RUNX3	5	25	0	16	23	16	56	38	3	49	0	8	14	51	0	4	32	72	68	191	7	328	14	17	4	161	10	161	7	25	17	65	6	57	86	39	0	5	8	4	1	3	7	4	13	5	2	9	6
MIR6731	0	0	0	0	0	0	0	0	0	0	0	0	0	0	0	0	0	2	0	2	0	1	0	0	0	0	0	0	0	0	0	1	0	1	0	0	0	0	0	0	0	0	0	0	0	0	0	0	0
AL445471.1	0	0	0	0	0	0	0	0	0	0	0	0	0	0	0	0	0	0	0	2	0	2	0	0	0	0	0	1	1	2	0	0	0	0	1	0	0	0	0	0	0	0	0	0	0	0	0	0	0
AL445471.2	0	0	0	0	0	0	0	0	0	0	0	0	0	0	0	0	0	0	0	0	0	0	0	0	0	0	0	0	0	0	0	0	0	0	2	0	0	0	0	0	0	0	0	0	0	0	0	0	0
MIR4425	0	0	0	0	0	0	0	0	0	0	0	0	0	0	0	0	0	0	0	0	0	0	0	0	0	1	0	0	0	0	0	0	0	0	0	0	0	0	0	0	0	0	0	0	0	0	0	0	0
LINC02793	0	0	0	0	0	0	0	0	0	0	0	0	0	0	0	0	0	0	0	0	1	0	0	0	0	0	0	0	0	0	0	0	0	1	3	0	0	0	0	0	0	0	0	0	0	0	0	0	0
AL050344.1	0	0	0	0	0	0	0	0	0	0	0	0	0	0	0	0	0	0	0	0	0	0	0	0	0	0	0	0	0	0	0	1	0	0	3	0	0	0	0	0	0	0	0	0	0	0	0	0	2
IFITM3P7	0	0	0	0	0	0	0	0	0	0	0	0	0	0	0	0	0	0	0	0	0	0	0	0	0	0	0	0	0	0	0	0	0	0	0	0	0	0	0	2	0	6	0	0	0	0	0	0	0
AL031432.1	0	0	0	0	0	0	0	0	0	0	0	0	0	0	0	0	0	0	0	0	0	0	0	0	0	0	0	0	0	0	0	0	0	0	0	0	0	0	0	0	0	0	0	0	0	0	0	0	0
SYF2	467	1293	229	441	508	171	1966	845	108	226	1575	305	1066	505	942	805	1071	1441	2156	376	16	116	65	141	1127	574	1203	295	814	749	840	870	885	811	328	185	360	269	573	212	385	236	984	275	199	122	205	271	133
AL031432.4	0	0	0	0	1	0	5	2	0	0	0	0	0	1	1	4	1	4	0	8	0	20	3	38	24	12	22	11	10	17	27	21	28	20	2	77	0	0	0	0	0	3	0	16	28	7	12	18	29
AL031432.5	0	1	0	0	0	0	0	0	0	0	0	0	0	1	0	0	0	1	1	1	0	0	3	6	3	1	8	3	3	6	2	5	9	3	1	21	0	0	0	0	0	0	0	1	5	2	2	9	7
RSRP1	490	1019	367	429	954	209	2282	668	384	94	973	282	1965	416	870	910	1665	3712	1073	764	11	942	568	1505	1002	1014	1844	771	521	1079	992	883	880	1122	465	1768	223	193	665	48	804	187	896	1079	980	600	791	1242	396
AL031432.3	0	0	0	0	0	0	0	0	0	0	0	0	0	0	0	0	0	0	0	2	0	0	0	0	1	2	5	0	0	2	0	2	1	1	0	1	0	0	0	0	0	0	0	0	0	0	0	0	1
AL031432.2	0	0	0	0	0	0	0	0	0	0	0	0	1	0	0	1	0	1	0	0	0	2	6	3	0	3	13	0	2	4	7	4	5	2	0	21	0	0	0	0	0	0	0	5	6	13	3	5	6
RHD	0	2	0	0	0	0	23	10	0	0	0	0	8	0	0	3	14	29	7	0	0	0	1	1	0	1	5	0	1	2	1	2	1	0	1	0	2	12	11	13	12	322	8	2	0	1	1	0	0
SDHDP6	2	1	0	0	9	0	6	9	0	0	0	1	11	0	0	5	15	3	1	2	0	0	0	1	1	0	1	0	0	2	3	1	0	0	0	2	0	2	2	8	2	16	4	0	2	1	1	1	0
AL928711.1	0	0	0	0	0	0	0	0	0	0	0	0	1	0	0	0	0	1	0	1	0	0	0	0	0	0	1	0	0	0	0	0	2	2	0	0	0	0	0	0	0	0	0	3	2	1	1	2	3
TMEM50A	299	780	347	167	171	104	1812	519	40	321	832	87	907	253	206	565	622	1111	747	588	8	163	69	220	1151	752	1446	603	877	857	1249	1005	740	964	399	223	17	246	12	44	46	175	729	309	256	219	337	462	216
RHCE	13	35	0	26	34	32	339	44	312	0	139	0	85	10	0	24	98	559	6	31	0	0	2	5	23	24	19	11	3	4	12	1	1	6	2	5	9	209	10	73	28	347	204	15	8	4	5	8	4
AL031284.1	0	2	0	0	0	0	1	0	0	0	0	0	1	2	0	3	0	1	2	2	0	0	0	0	0	0	0	0	0	0	0	0	0	0	0	0	0	2	0	8	1	25	11	0	0	1	0	0	0
MACO1	219	673	261	430	536	201	1655	425	199	236	2392	103	1474	153	268	444	706	1364	738	593	4	146	136	426	1112	713	1785	397	731	1496	1373	741	847	1210	268	531	273	370	507	78	398	189	622	548	507	313	737	644	307
LDLRAP1	49	174	555	5	144	18	564	258	199	38	113	10	872	90	0	97	181	200	320	273	1	461	106	131	246	322	400	128	732	168	503	513	376	130	50	380	237	847	931	93	1620	87	739	96	29	27	55	236	67
AL606491.1	0	0	0	0	0	0	1	0	0	0	0	0	0	0	0	0	0	0	0	2	0	8	5	3	6	2	1	8	4	5	6	7	4	3	2	8	0	0	0	0	0	0	0	5	0	0	2	1	0
MAN1C1	97	655	7	261	999	120	347	1197	116	106	452	9	628	117	49	274	517	241	235	759	12	477	93	395	423	1350	2127	556	1298	1097	1802	904	759	635	144	967	24	223	288	67	670	181	960	218	321	134	817	645	235
AL031280.1	0	0	0	0	1	0	0	0	0	0	0	1	0	0	0	0	0	0	0	0	0	0	0	0	0	0	1	0	0	0	1	0	0	0	2	0	0	0	0	0	0	0	0	0	0	0	0	0	1
SELENON	336	1107	268	541	852	155	1027	1058	601	477	658	86	1773	249	391	516	884	686	762	1002	7	153	178	482	414	1522	728	646	1121	757	696	1648	802	656	290	608	36	644	253	34	1020	130	1562	58	122	78	193	107	174
AL020996.2	0	0	0	0	0	0	0	0	0	0	0	0	0	0	0	0	0	0	0	0	0	0	0	0	0	0	0	0	0	0	0	0	0	0	0	0	0	0	0	0	0	0	0	0	0	0	0	0	0
AL020996.1	1	2	1	0	0	0	5	1	0	0	0	0	3	0	0	4	0	2	1	7	1	7	4	10	20	27	21	10	15	23	30	23	12	9	4	32	0	1	0	0	1	0	0	14	13	12	10	8	7
MTFR1L	83	526	145	160	510	126	567	733	179	77	61	27	486	116	324	208	309	505	256	436	2	89	81	222	649	501	935	265	808	489	674	627	442	471	126	453	87	289	123	74	257	134	721	227	246	155	338	366	148
AL020996.3	0	0	0	0	0	0	0	0	0	0	0	0	0	0	0	0	0	0	0	0	0	0	0	0	0	0	0	0	0	0	0	0	0	0	0	0	0	0	0	0	0	0	0	0	0	0	0	0	0
AUNIP	0	5	0	0	0	7	4	1	0	34	0	8	5	14	0	35	0	8	178	2	1	3	1	0	3	3	3	7	0	6	2	6	0	9	5	2	1	0	0	8	0	36	0	2	3	3	13	2	2
AL033528.3	0	2	0	0	0	0	0	2	0	0	0	0	2	0	0	2	2	0	1	0	0	0	1	1	2	0	1	0	0	0	0	4	1	0	0	1	3	0	0	1	0	13	0	0	0	1	0	0	1
PAQR7	54	122	1	109	88	30	83	146	87	9	20	2	88	18	12	53	119	76	40	116	3	24	8	43	183	158	179	113	200	132	194	120	109	77	27	54	2	43	1	3	28	8	87	25	36	23	44	56	27
AL033528.1	0	0	0	0	0	0	0	0	0	0	0	0	0	0	0	0	0	0	0	0	0	0	0	0	0	0	0	0	0	0	0	0	0	0	0	0	0	0	0	0	0	0	0	0	0	0	0	0	0
STMN1	275	696	268	994	717	257	1604	795	126	1360	1200	498	592	1696	244	1261	610	1276	6892	682	6	106	175	245	2246	1090	1336	591	482	1065	1766	723	287	1086	419	778	51	275	249	84	218	186	668	930	577	555	1114	493	270
SNRPFP2	0	0	0	0	0	0	0	0	0	0	0	0	0	0	0	0	0	0	0	0	0	0	0	0	0	0	0	0	0	0	0	0	0	0	0	0	1	0	0	0	0	2	0	0	0	0	0	0	0
AL033528.2	0	0	0	0	0	0	0	0	0	0	0	0	0	0	0	0	0	0	0	0	0	0	0	0	0	0	0	0	0	0	0	0	0	0	0	0	1	0	0	7	0	0	0	0	0	0	0	0	0
MIR3917	0	0	0	0	0	0	0	0	0	0	0	0	0	0	0	0	0	0	0	0	0	0	0	0	0	0	0	0	0	0	0	0	0	0	0	0	0	0	0	0	0	0	0	0	0	0	0	0	0
PAFAH2	43	209	79	212	170	61	209	283	54	45	112	17	169	90	164	42	213	142	126	393	4	106	55	163	628	354	618	167	842	358	661	509	449	379	103	326	46	78	55	24	54	59	218	143	170	92	192	209	115
RNU6-110P	0	0	0	0	0	0	0	0	0	0	0	0	0	0	0	0	0	0	0	0	0	0	0	0	0	0	0	0	0	0	0	0	0	0	1	0	0	0	0	0	0	0	0	0	0	0	0	0	0
AL592064.1	0	0	0	0	0	0	0	0	0	0	0	0	0	0	0	0	0	0	0	0	0	0	0	0	0	0	0	0	0	0	0	0	0	0	0	0	0	0	0	0	0	0	0	0	0	0	0	0	0
AL592064.2	0	0	0	0	0	0	0	0	0	0	0	0	0	0	0	0	0	0	0	0	0	0	0	0	0	0	0	0	0	0	0	0	0	0	1	0	0	0	0	0	0	0	0	0	0	0	0	0	0
EXTL1	2	32	0	51	35	14	6	10	61	1	0	0	3	1	0	14	22	4	3	24	1	0	1	9	10	8	2	2	3	112	46	10	3	3	8	192	1	0	0	14	0	27	3	0	5	1	3	40	4
SLC30A2	0	40	116	12	78	37	86	2	0	0	0	0	42	20	0	8	1	0	1	2	0	1	0	35	257	18	9	0	3302	7	82	181	69	110	1	22	55	1	36	9	0	55	8	5	0	0	0	10	18
AL391650.2	0	0	0	0	0	0	0	0	0	0	0	0	0	0	0	0	0	0	0	0	0	0	0	0	3	0	0	0	22	0	0	2	1	0	1	0	0	0	0	0	0	0	0	0	0	0	1	0	0
TRIM63	2	2	0	0	0	0	2	0	0	0	0	0	0	0	41	0	9	1	0	2	2	0	1	0	9	1	1	0	93	6	1	2	1	2	4	0	2	0	3	4	0	17	0	0	1	0	0	1	1
PDIK1L	45	144	47	81	153	51	441	82	44	79	81	11	170	27	44	62	73	233	158	127	6	72	24	73	797	270	551	172	798	231	635	711	899	468	74	77	11	41	8	31	39	37	136	230	171	88	299	196	181
FAM110D	0	2	4	0	5	2	0	0	0	0	0	0	0	2	0	0	0	0	0	61	0	4	18	8	17	98	38	46	97	51	18	99	31	18	6	9	0	0	0	0	1	0	0	2	0	0	0	6	2
C1orf232	0	0	0	0	0	0	0	0	0	0	0	0	0	0	0	0	0	0	0	0	0	0	0	0	0	0	0	0	0	0	0	0	1	0	2	0	0	0	0	0	0	0	0	0	0	0	1	0	0
AL391650.1	0	0	0	0	0	0	0	4	0	0	0	0	1	0	0	1	0	0	4	0	0	0	0	0	1	1	0	0	5	0	4	3	2	1	0	1	0	1	0	7	0	2	0	0	0	0	0	0	1
ZNF593	1	9	3	4	6	0	17	5	4	5	2	4	17	10	0	20	5	24	22	58	5	17	23	21	85	84	114	32	216	118	93	98	76	71	37	29	1	15	3	12	20	2	34	10	6	7	9	20	10
CNKSR1	182	1483	163	272	2169	224	1447	2386	583	249	527	325	1907	587	331	597	1261	1225	238	129	2	10	70	177	137	144	285	69	224	178	136	231	163	140	31	337	314	586	1107	127	466	444	371	37	47	36	90	51	36
CATSPER4	0	3	0	0	0	11	3	1	0	0	0	0	2	0	0	1	0	2	0	2	0	0	0	1	0	0	1	0	1	1	0	5	0	3	6	2	7	2	0	43	1	97	0	1	0	0	0	0	1
ZPLD2P	0	0	0	1	0	0	0	0	0	0	0	0	0	0	0	2	0	0	0	9	1	0	3	4	37	11	35	0	148	2	24	98	97	22	9	18	0	0	0	0	1	0	0	3	5	1	3	14	12
AL355877.2	0	0	0	0	0	0	0	0	0	0	0	0	0	0	0	0	1	0	0	0	0	0	0	1	0	0	1	0	0	0	2	0	0	0	1	0	0	0	0	0	1	2	0	0	0	0	0	0	0
CEP85	33	171	216	45	237	60	401	213	95	145	45	74	268	214	0	225	180	449	795	80	3	89	79	60	188	120	260	136	316	88	160	149	190	138	69	142	343	72	699	114	471	141	264	65	45	64	103	97	31
AL355877.1	0	0	0	0	0	0	0	0	0	0	0	0	0	0	0	0	0	0	0	0	0	0	0	0	0	0	0	0	0	0	0	0	0	0	0	0	0	0	0	0	0	1	0	1	0	0	0	0	0
SH3BGRL3	45	160	27	44	33	40	226	80	70	45	131	21	136	67	4	73	106	153	154	543	23	293	105	158	367	745	819	572	396	459	470	976	231	419	513	220	3	60	9	45	8	35	234	49	46	47	37	84	50
UBXN11	47	84	124	21	127	6	97	276	37	186	29	42	115	175	0	103	146	64	337	96	7	113	254	210	255	237	516	130	428	100	205	466	402	248	57	311	181	188	968	207	428	81	305	93	33	39	16	57	38
CD52	60	46	0	52	8	3	957	12	38	10	219	6	87	26	218	19	51	350	144	134	14	350	29	4	14	92	11	158	6	44	9	103	27	143	87	6	0	1	2	20	0	23	84	2	19	2	4	7	4
CRYBG2	0	22	0	0	0	5	5	2	0	0	0	1	2	22	0	1	11	2	4	0	2	4	2	2	3	9	3	9	0	0	0	6	1	3	8	0	4	0	3	16	0	65	5	2	0	0	3	0	0
AL451139.1	0	0	0	0	0	0	0	0	0	0	0	0	0	0	0	0	0	0	0	0	0	0	0	0	0	0	0	0	0	0	0	0	0	0	3	0	0	0	0	0	0	2	0	0	0	0	0	0	0
ZNF683	3	14	18	0	1	4	11	0	0	0	0	2	3	1	0	1	15	12	5	0	0	4	7	2	3	10	0	12	1	0	2	10	6	4	6	5	5	0	7	13	0	45	3	0	0	0	0	0	0
LIN28A	0	0	0	0	0	0	0	3	0	0	0	0	0	1	0	2	0	1	0	0	2	0	1	0	0	0	0	0	0	3	0	0	0	2	4	0	0	0	0	3	0	34	0	0	0	0	0	0	1
DHDDS	81	431	142	98	369	94	450	454	177	164	533	108	429	237	4	246	304	468	477	402	12	93	83	217	528	434	767	321	517	485	631	422	306	365	119	381	74	341	182	68	347	217	714	170	175	124	221	223	105
AL513365.1	22	85	0	9	24	3	74	72	137	82	35	1	83	7	0	21	25	214	14	2	0	3	0	3	3	3	3	2	1	2	1	1	1	2	0	6	3	3	0	15	4	27	19	6	4	3	4	6	6
DHDDS-AS1	0	7	0	1	15	1	9	13	0	3	0	1	2	1	0	2	8	14	3	11	0	22	3	19	12	11	8	17	10	13	10	13	17	27	8	100	0	2	0	2	2	1	5	38	43	26	23	16	7
HMGN2	768	3469	1595	1141	3094	317	6754	3582	927	3207	2844	491	3867	3674	1066	3408	2850	4884	8911	1139	2	152	45	182	591	370	536	212	469	460	702	551	561	408	81	323	662	3099	1714	658	1417	1090	10608	838	544	420	843	723	286
DPPA2P2	0	0	0	0	0	0	0	0	0	0	0	0	0	0	0	0	5	0	0	0	0	0	0	0	0	0	0	0	0	0	0	0	0	1	0	0	0	0	2	7	0	23	0	0	0	0	0	1	0
RPS6KA1	75	553	91	142	593	112	461	570	163	139	272	42	240	311	193	114	528	366	504	939	10	313	145	153	394	396	333	247	1445	519	412	698	599	384	129	120	46	63	116	146	166	156	1008	82	166	69	215	350	65
MIR1976	0	0	0	0	0	0	0	0	0	0	0	0	0	0	0	0	0	0	0	0	0	0	0	0	0	0	1	0	0	0	0	0	0	0	0	0	0	0	0	0	0	0	0	0	0	0	0	0	0
RN7SL679P	0	1	0	0	0	0	0	0	0	0	0	0	0	0	0	0	0	0	0	0	3	1	11	2	13	9	6	6	2	24	11	18	9	8	5	6	0	0	0	0	0	0	0	0	0	0	0	0	1
AL627313.2	0	0	0	0	0	0	0	0	0	0	0	0	0	0	0	0	0	0	0	0	0	0	0	0	0	0	0	0	0	0	0	0	0	0	0	0	0	0	0	0	0	0	0	0	1	0	0	0	1
RNU7-29P	0	0	0	0	0	0	1	0	0	0	0	0	0	0	0	0	0	0	0	0	0	0	0	0	0	0	0	0	0	0	0	0	0	0	0	0	0	0	0	0	0	0	0	0	0	0	0	0	0
AL627313.1	0	0	0	0	0	0	0	0	0	0	0	0	0	0	0	0	0	0	0	0	0	0	0	0	0	0	0	0	0	0	0	0	0	0	0	0	0	0	0	0	0	0	0	0	0	0	0	0	0
AL627082.2	0	0	0	0	0	0	0	0	0	0	0	0	0	0	0	0	0	0	0	0	0	0	0	0	0	0	0	0	0	0	0	0	0	0	0	0	0	0	0	0	0	0	0	0	0	0	0	0	0
AL627082.1	0	0	0	0	0	0	0	0	0	0	0	0	0	0	0	0	0	0	0	0	0	0	0	0	0	0	0	0	0	0	0	0	0	0	0	0	0	0	0	0	0	0	0	0	0	0	0	0	0
AL512408.1	0	0	0	0	0	0	2	0	0	0	0	0	0	0	0	0	0	0	0	7	0	1	1	10	15	16	12	4	17	18	22	22	16	7	7	17	0	0	0	0	0	0	0	3	2	2	6	11	4
ARID1A	5316	7433	1096	4202	1993	2801	20971	1748	1387	1146	4684	891	9818	933	2771	5814	7006	13806	5025	2519	13	1085	337	1325	1285	1804	1835	1090	1964	1434	1768	2090	1532	1844	759	2061	156	1509	2144	769	2586	757	5903	543	746	441	1067	496	542
PIGV	46	186	38	108	90	71	545	243	127	31	17	13	168	63	79	87	144	385	121	179	3	45	19	95	314	165	367	90	445	196	474	276	303	209	27	166	8	105	5	24	19	95	272	87	75	46	66	132	59
RN7SL165P	0	0	0	0	0	0	0	0	0	0	0	0	0	0	0	0	0	0	0	0	1	1	2	0	10	4	0	7	0	4	7	7	4	20	6	3	0	0	0	0	0	1	0	0	0	0	0	1	3
AL034380.2	0	0	0	0	0	0	0	0	0	0	0	0	0	0	0	0	0	0	0	0	0	0	0	0	0	0	0	0	0	0	0	0	0	0	0	0	0	0	0	0	0	0	0	0	0	0	0	0	0
ZDHHC18	34	158	0	85	163	23	289	175	73	63	42	15	210	214	56	57	162	269	292	225	7	170	55	117	192	294	295	210	376	266	197	362	265	128	72	179	5	81	42	26	98	47	368	27	32	57	60	68	66
SFN	11	53	0	0	0	4	0	7	0	17	45	26	2	729	0	4	2	2	49	0	0	1	0	3	1	12	5	3	1	3	5	6	1	14	1	0	3	0	8	2	2	7	1	0	0	0	0	1	2
GPN2	23	124	224	33	122	26	259	94	131	13	35	25	210	53	0	96	167	231	181	347	14	133	85	186	398	248	529	186	331	451	435	348	285	251	81	298	15	82	50	8	152	35	182	156	128	78	150	184	118
AL034380.1	0	0	0	0	0	0	0	0	0	0	0	0	0	0	0	0	0	0	0	0	0	0	0	0	0	0	0	0	0	0	0	0	0	0	0	0	0	0	0	0	0	0	0	0	0	0	0	0	0
GPATCH3	55	167	70	118	233	21	202	300	84	36	77	20	212	111	77	70	138	239	293	98	1	32	50	47	125	67	180	91	160	98	155	158	89	77	39	92	39	64	111	13	209	83	260	22	35	16	43	28	12
NUDC	648	2500	685	1772	1190	339	5453	1680	844	966	1353	381	2325	1042	861	1787	1631	3555	5447	517	9	81	130	177	458	421	1012	350	894	340	719	693	535	481	239	318	1099	1444	2041	509	1900	602	4157	165	121	98	231	180	70
NR0B2	0	4	7	29	1	13	144	2	0	3	0	0	0	0	0	0	0	97	0	274	0	0	21	212	208	120	660	43	0	169	594	1	0	127	18	274	2	18	3	5	20	14	18	33	28	13	18	14	15
KDF1	9	45	4	32	25	18	116	92	15	21	7	5	108	36	39	11	26	112	0	137	0	3	15	43	169	83	310	35	288	164	279	122	141	112	11	91	4	50	9	4	23	16	160	36	32	23	45	55	22
RPL12P13	0	7	0	3	16	0	9	8	1	0	20	0	16	1	28	0	8	12	1	0	0	0	1	0	3	0	2	2	0	2	1	0	1	0	0	8	0	1	0	2	4	19	1	0	5	1	1	0	1
AL356390.1	0	1	0	0	2	0	0	1	0	0	0	0	0	1	0	0	0	0	0	0	0	0	0	2	2	0	1	1	0	4	1	1	0	3	3	5	0	0	0	0	0	0	0	0	0	0	2	1	1
OSTCP2	1	0	0	1	0	0	0	0	0	0	0	0	1	0	0	2	0	2	0	3	0	0	0	0	0	0	0	0	0	0	0	0	0	0	0	0	0	0	0	8	0	28	0	1	0	0	0	0	0
TRNP1	3	2	1	2	8	33	7	2	1	0	7	0	6	3	8	1	0	2	0	128	3	2	13	80	126	105	88	57	25	189	301	27	13	96	43	121	0	0	0	0	0	0	1	139	40	96	113	43	25
TENT5B	0	49	0	0	8	0	6	17	0	1	0	0	1	14	0	2	2	9	10	32	0	0	1	54	123	137	22	39	274	21	105	108	39	157	52	32	0	0	3	1	0	3	8	8	1	0	11	5	7
SLC9A1	79	528	171	61	422	109	587	499	141	212	117	63	494	300	0	194	414	552	498	439	2	86	104	204	157	358	359	258	217	215	262	409	157	227	96	233	22	158	168	49	256	153	438	29	38	45	103	46	45
AL590640.2	0	0	0	0	0	0	0	1	0	0	0	0	0	0	0	0	0	0	0	0	0	0	0	0	0	1	1	0	0	0	0	0	0	0	0	0	0	0	0	0	0	4	0	0	0	0	0	0	0
CHCHD3P3	1	9	0	2	25	0	11	22	0	0	0	2	2	10	49	11	4	11	7	2	0	0	0	0	0	0	2	0	5	0	1	0	0	1	2	0	3	0	5	4	3	33	1	1	0	0	0	0	0
NPM1P39	13	29	4	2	47	0	48	16	1	1	273	11	16	170	17	39	17	17	92	5	1	1	1	0	0	1	1	0	0	0	0	0	0	1	0	4	1	4	2	35	1	66	4	1	2	1	0	1	0
SNRPEP7	0	0	0	0	0	0	0	0	0	0	0	0	0	3	0	1	0	0	0	0	0	0	0	0	0	0	0	0	0	0	0	1	0	0	0	0	0	0	0	0	0	0	0	0	0	0	0	0	0
AL590640.1	0	0	0	0	0	0	0	0	0	0	0	0	0	0	0	0	0	0	0	0	0	0	0	0	0	0	0	0	0	0	0	0	0	0	0	0	0	0	0	0	0	0	0	0	0	0	0	0	0
WDTC1	173	977	736	293	789	114	1372	957	392	176	452	113	951	307	588	408	868	1102	756	925	7	188	152	406	568	978	971	560	1248	801	907	1193	630	644	204	725	80	670	190	102	217	222	1132	151	160	127	275	239	143
AL590640.3	0	0	0	0	0	0	0	0	0	0	0	0	0	0	0	0	0	0	0	0	0	0	0	0	0	0	0	0	0	0	0	0	0	0	0	0	0	0	0	0	0	0	0	0	0	0	0	0	0
FO393419.3	1	1	0	0	1	0	48	4	0	54	0	1	7	10	0	19	5	11	2	6	0	2	0	1	5	3	4	1	1	3	3	2	6	1	1	4	0	2	0	0	0	3	2	7	4	3	5	2	2
TMEM222	30	165	107	72	111	74	221	147	20	15	111	8	194	55	34	86	162	212	138	367	2	59	51	160	419	321	694	154	527	358	622	355	255	263	47	308	6	115	44	23	66	63	452	52	54	56	62	126	43
RNU6-48P	0	0	0	0	0	0	0	0	0	0	0	0	0	0	0	0	0	2	0	0	0	0	0	1	1	0	2	0	0	0	0	1	0	0	1	0	0	0	0	0	0	0	0	1	0	0	3	2	2
ACTG1P20	3	13	3	0	16	1	26	5	10	0	12	17	37	13	0	29	28	41	26	7	0	22	6	15	3	1	15	4	6	11	4	2	6	6	3	22	10	3	72	5	71	5	17	8	7	3	8	6	1
SYTL1	7	44	126	77	228	34	187	119	51	157	9	12	199	137	0	48	40	181	105	291	7	362	110	158	238	313	573	252	172	635	548	62	79	145	33	348	91	283	966	24	255	17	436	56	26	63	12	85	22
MAP3K6	31	280	67	22	73	68	150	111	148	41	11	44	337	96	25	112	213	168	164	505	8	96	312	179	134	252	225	278	381	661	153	296	129	117	84	220	23	66	169	11	69	76	110	20	29	29	44	62	28
FCN3	5	4	0	110	0	2	8	6	0	0	16	0	2	11	0	1	0	0	3	117	5	0	24	9	13	15	191	2	23	106	25	0	2	18	37	13	0	9	5	10	1	21	17	0	4	0	4	9	3
CD164L2	0	0	0	0	0	0	4	0	0	0	0	0	1	1	0	9	0	1	1	0	2	3	0	0	0	1	2	1	7	24	5	1	1	1	1	0	4	1	0	3	0	2	3	1	0	0	0	1	0
FO393419.1	0	0	0	0	0	0	0	0	0	0	0	0	0	0	0	0	0	0	0	0	0	0	0	0	0	1	0	0	0	0	0	0	0	0	0	0	0	0	0	0	0	1	0	0	0	0	0	0	0
GPR3	3	4	24	1	3	0	10	2	0	0	78	1	17	8	0	6	0	5	42	50	0	1	1	2	16	37	70	16	27	40	14	0	1	26	9	3	0	20	0	14	0	16	2	2	1	1	9	6	8
WASF2	618	2548	550	574	1088	741	3948	1008	557	581	1509	295	2447	581	1708	2050	2295	2551	2391	2164	14	389	224	553	806	1894	1174	1244	1289	965	1087	2476	978	1087	755	832	640	324	1283	151	1105	325	1304	250	349	240	380	355	528
FO393419.2	0	0	0	0	0	0	0	0	0	0	0	0	0	0	0	0	0	0	0	0	0	0	0	0	0	0	0	0	0	0	0	0	0	0	0	0	0	0	0	0	0	0	0	0	0	0	0	0	0
BX293535.1	0	1	0	0	0	0	0	1	0	0	0	0	1	0	0	0	0	1	0	30	0	4	3	8	10	7	25	7	0	8	36	0	0	9	1	26	0	0	0	0	0	0	0	11	9	15	6	11	5
AHDC1	60	321	152	110	395	89	490	454	264	141	69	27	448	59	23	455	313	617	327	751	5	114	385	510	308	741	714	559	508	446	612	708	339	404	106	1002	20	143	149	19	159	36	351	61	104	66	107	75	99
FGR	30	64	0	12	29	59	39	26	11	127	0	10	62	24	0	18	63	53	116	157	8	94	69	30	22	172	70	103	42	211	23	200	32	56	163	21	7	4	28	38	26	51	32	0	16	3	7	10	12
AL031729.1	1	8	9	2	1	0	7	0	1	0	12	3	3	0	0	3	6	1	2	6	0	1	1	4	1	2	4	3	5	4	3	1	0	1	0	2	0	1	2	5	1	7	2	3	1	0	1	1	1
LINC02574	0	0	0	0	0	0	0	0	0	0	0	0	0	0	0	0	0	0	0	0	0	0	0	0	0	0	0	1	1	0	2	0	0	0	0	0	0	0	0	0	0	0	0	0	0	0	0	1	0
IFI6	15	82	73	84	177	24	662	204	73	227	3	115	99	96	10	134	46	246	45	290	15	20	529	721	1688	1211	2803	3485	834	1224	3636	2728	361	561	321	394	8	89	15	22	119	29	564	75	381	869	34	424	385
AL445490.1	0	0	0	0	0	0	0	0	0	0	0	0	0	0	0	0	0	0	0	0	0	1	0	0	0	0	1	0	0	1	0	0	0	0	0	0	0	0	0	0	0	0	0	0	0	0	0	0	2
RNU6-949P	0	0	0	0	0	0	0	0	0	0	0	0	0	0	0	0	0	0	0	0	0	0	0	0	0	0	0	0	0	0	0	0	0	0	0	0	0	0	0	0	0	1	0	0	0	0	0	0	0
CHMP1AP1	0	0	0	0	0	0	0	0	0	0	0	0	0	0	0	0	0	0	0	0	2	0	0	0	0	0	0	0	0	0	0	0	0	0	0	0	0	0	0	0	0	1	0	0	0	0	0	0	0
RNU6-424P	0	0	0	0	0	0	0	0	0	0	0	0	0	0	0	0	0	0	0	0	0	0	0	0	0	0	0	0	0	0	0	0	0	0	0	0	0	0	0	0	0	0	0	0	0	0	0	0	0
AL020997.5	0	0	0	0	0	0	0	0	0	0	0	0	0	0	0	0	0	0	0	0	0	0	0	0	2	1	1	4	0	3	1	5	2	0	0	0	0	0	0	0	0	0	0	1	0	0	0	1	0
FAM76A	66	201	15	120	170	84	455	123	68	20	42	32	166	62	231	139	158	321	223	189	3	67	73	112	374	259	349	128	377	187	429	432	302	347	73	179	370	88	776	39	461	95	256	196	101	92	98	133	119
AL020997.1	0	3	0	0	0	0	3	1	0	0	0	1	2	1	0	1	0	4	6	0	1	4	1	1	0	1	2	1	0	2	2	1	1	1	3	9	0	0	0	0	0	2	2	4	2	1	0	3	0
RPEP3	4	11	0	0	15	0	23	21	0	0	0	0	10	9	0	14	26	15	9	6	0	0	0	0	2	0	1	1	1	0	1	1	0	2	0	7	2	0	0	9	1	20	2	5	1	2	1	4	5
STX12	216	591	49	247	319	139	1085	228	74	102	532	61	764	94	42	283	560	805	508	911	17	144	108	576	2405	941	2887	531	4071	1533	1502	1985	1392	1472	581	431	92	420	415	101	293	258	870	444	517	207	481	600	393
AL020997.2	0	0	0	0	0	0	0	0	0	0	0	0	0	0	0	0	0	1	0	8	0	0	1	12	1	2	6	5	5	6	4	5	4	3	4	8	0	0	0	0	0	0	0	8	3	5	7	10	11
AL020997.3	0	1	0	0	0	0	0	0	0	0	0	0	0	0	0	0	0	0	0	4	0	1	0	10	1	2	6	2	1	3	1	3	1	0	0	1	0	0	0	0	0	0	0	5	12	1	5	4	5
RNU6-1245P	0	0	0	0	0	0	0	0	0	0	0	0	0	0	0	0	0	0	0	0	0	2	0	2	0	1	0	0	0	0	0	0	0	1	0	0	0	0	0	0	0	0	0	0	0	0	0	0	0
AL020997.4	0	0	0	0	0	0	0	0	0	0	0	0	0	0	0	0	0	0	0	0	0	0	0	0	0	0	0	0	0	0	0	0	0	0	2	0	0	0	0	0	0	0	0	1	0	0	0	0	0
PPP1R8	106	395	137	114	157	41	649	201	63	123	325	54	396	141	493	309	391	397	599	400	7	109	54	160	685	375	821	245	559	580	765	568	431	507	232	211	127	228	446	71	350	163	703	214	162	117	178	199	142
SCARNA1	6664	2204	773	2997	770	519	4819	666	219	88	1493	106	2388	91	1777	1101	2145	1443	1037	8	0	0	4	18	63	68	11	29	13	62	62	96	27	32	7	15	17	4075	64	20	75	215	3374	18	13	9	9	11	43
THEMIS2	7	64	14	16	76	60	77	91	25	204	55	16	65	55	0	49	93	129	255	413	11	279	103	109	99	421	370	420	202	411	113	316	172	258	224	122	2	18	52	26	52	49	58	9	72	69	20	70	31
RPA2	60	269	123	290	90	153	1077	63	151	236	289	75	348	93	235	383	212	951	808	258	3	115	22	96	728	350	854	239	1075	385	794	548	584	480	117	157	8	130	83	37	52	149	637	335	148	152	209	233	67
SMPDL3B	12	37	51	0	0	0	75	0	0	6	410	0	18	41	0	93	27	3	53	131	1	1	8	64	161	88	462	15	490	179	179	165	174	138	23	56	25	13	11	30	0	98	563	7	45	32	47	194	20
AL512288.1	0	0	0	0	0	9	3	0	0	0	0	0	2	0	0	0	0	9	5	4	0	0	0	1	2	2	0	0	0	0	2	1	0	0	2	0	0	0	0	3	1	6	0	0	1	0	0	0	0
XKR8	2	10	7	4	16	15	13	46	7	0	0	1	21	6	0	14	9	26	19	66	1	29	19	40	66	73	90	66	116	80	113	121	77	45	18	64	4	9	5	7	6	11	25	24	17	11	13	35	24
EYA3	530	607	273	506	295	243	1558	192	193	381	1221	103	1226	131	511	514	691	1106	1326	722	9	236	92	457	1143	746	1408	332	616	663	1017	784	782	792	291	770	98	188	182	81	316	262	1205	485	353	317	441	366	328
AL512288.2	0	0	0	0	0	0	0	0	0	0	0	0	0	0	0	1	0	0	0	2	1	3	2	8	2	1	7	2	1	2	0	4	2	2	2	10	0	0	0	0	0	0	0	4	1	4	4	4	0
RN7SL559P	0	0	0	0	0	0	2	0	0	0	0	0	0	0	0	0	0	1	1	15	2	2	12	2	23	13	13	14	5	59	20	45	15	33	23	30	0	0	0	0	0	0	0	16	10	13	14	12	4
SPCS2P4	2	12	2	2	3	3	27	1	1	3	15	0	13	1	0	24	10	21	11	3	0	0	0	1	1	3	5	1	5	12	3	4	4	3	1	0	0	4	1	2	0	22	9	6	0	2	2	5	3
AL137792.2	0	0	0	0	0	0	3	0	0	0	0	0	0	0	0	0	0	0	0	0	0	0	0	0	0	0	0	0	0	0	0	0	0	0	1	0	0	0	0	0	0	0	0	0	0	0	0	0	0
AL137792.1	1	0	0	0	0	0	6	0	1	0	0	0	4	0	33	3	0	2	1	0	1	0	1	0	0	0	1	0	0	1	2	1	0	0	0	1	1	1	0	12	0	24	2	0	1	0	0	1	0
RNU6-176P	0	0	0	0	0	0	0	0	0	0	0	0	0	0	0	0	0	0	0	0	0	0	0	0	0	0	0	0	0	0	0	0	0	0	1	0	0	0	0	0	0	0	0	0	0	0	0	0	1
PTAFR	13	51	0	20	7	9	54	17	3	4	0	6	28	4	0	17	91	40	77	223	5	44	20	21	31	182	53	157	34	137	59	177	52	68	111	26	1	7	1	10	2	23	35	8	38	4	29	15	14
DNAJC8	816	2376	605	779	1181	449	2519	1784	369	710	1779	318	1849	1084	2094	1916	1929	1682	4345	613	4	131	82	157	908	434	1044	356	1007	666	766	916	810	697	322	183	1851	454	1920	464	1359	828	1998	300	242	130	280	308	170
ATP5IF1	112	458	294	476	446	142	424	588	159	266	179	52	404	297	274	239	442	178	322	562	10	96	80	291	1254	439	1497	308	1337	892	1339	858	964	919	235	394	58	659	175	67	306	145	1383	225	221	143	274	213	335
AL353622.1	0	3	5	1	2	0	3	1	0	1	0	6	5	2	0	7	0	1	5	8	0	15	8	24	30	6	29	12	4	21	24	7	0	24	3	47	0	3	0	0	4	0	4	14	39	3	21	2	13
AL353622.2	0	0	0	0	0	0	0	0	0	0	0	0	0	0	0	0	0	0	0	0	0	0	0	0	0	0	0	0	0	0	0	0	1	0	2	0	0	0	0	0	0	0	0	0	0	0	0	0	0
SESN2	8	75	74	58	169	35	80	324	57	25	0	5	97	16	23	52	109	8	54	138	0	21	62	48	82	148	67	83	150	128	104	85	53	43	22	41	10	162	29	11	43	35	355	12	15	9	15	16	17
MED18	8	47	0	27	33	31	55	50	13	18	0	11	65	99	0	46	56	68	41	104	46	65	51	47	151	96	197	78	122	141	180	256	131	94	36	78	1	36	6	9	7	36	167	51	37	22	41	63	17
PHACTR4	744	1263	270	720	669	291	1245	593	283	430	773	213	1237	555	1118	1532	1209	644	1446	680	23	183	385	300	443	487	424	399	484	374	454	834	527	587	293	469	242	303	675	118	631	273	664	172	192	74	386	195	173
CR589951.1	0	0	0	0	0	0	0	0	0	0	0	0	0	0	0	0	0	0	0	0	0	0	4	0	1	5	0	2	0	0	2	0	0	1	1	1	0	0	0	0	0	0	0	0	0	0	0	0	0
CR391992.1	5	20	0	4	16	1	19	30	11	0	34	6	21	39	0	46	14	18	28	6	1	3	1	4	2	0	1	4	1	4	1	2	2	0	0	5	6	0	0	1	5	6	0	3	5	2	9	9	3
RNU6ATAC27P	0	0	0	0	0	0	0	0	0	0	0	0	0	0	0	0	0	0	0	0	0	1	0	0	1	1	0	2	0	0	0	0	0	0	1	3	0	0	0	0	0	0	0	2	1	0	2	1	1
RCC1	25	101	50	71	94	66	116	80	55	305	62	117	47	284	0	125	104	61	924	77	5	79	31	32	96	117	111	90	259	133	80	151	123	110	100	43	66	81	68	36	38	79	155	18	25	14	68	43	21
SNHG3	8	8	10	1	0	0	39	2	2	19	9	28	6	39	0	28	0	15	53	98	1	128	21	80	198	176	199	91	151	322	223	150	164	120	86	83	0	4	0	1	0	17	6	86	104	83	108	174	54
SNORA73A	0	0	0	0	0	0	0	0	0	0	0	0	0	0	0	0	0	0	0	0	0	0	0	0	0	0	0	0	0	0	0	0	0	0	0	0	0	0	0	0	0	0	0	0	0	0	0	0	0
SNORA73B	19375	44488	26500	35918	39341	6627	33146	26427	19508	16469	16688	47141	39254	18622	20233	18518	65461	24916	110001	8287	325	1168	11757	3368	2471	2842	2335	1895	4234	4419	3852	1956	1844	1511	357	7736	101042	93584	121383	81461	57735	7562	263847	485	727	262	481	639	391
PRDX3P2	0	0	0	0	0	0	1	0	0	0	0	0	0	0	0	0	0	0	0	0	0	0	0	0	0	0	0	2	1	0	1	0	1	0	1	0	0	0	0	0	0	2	0	0	0	0	0	0	0
AL513497.1	0	0	0	0	0	0	0	0	0	0	0	2	0	2	0	2	0	1	0	0	2	2	1	2	2	5	3	1	9	3	0	4	2	4	9	2	0	0	0	0	0	1	0	0	2	0	1	0	2
TRNAU1AP	50	155	34	94	145	41	191	93	64	50	22	24	208	59	19	128	122	150	245	143	10	72	50	89	208	93	226	115	140	169	203	158	123	118	47	194	40	55	66	28	149	75	243	115	97	73	112	118	45
SNHG12	0	2	1	0	0	0	27	8	9	1	0	5	6	9	0	8	0	23	7	128	1	95	82	71	111	73	168	67	65	216	95	95	83	98	83	160	0	2	0	0	8	9	7	66	66	46	116	82	23
SNORD99	45	33	9	71	24	20	54	20	1	8	37	13	25	51	194	17	73	118	78	2	0	0	0	0	3	4	1	3	0	2	5	2	2	2	2	2	0	0	1	8	0	3	41	1	2	0	4	1	2
SNORA61	0	0	0	0	0	0	0	0	0	0	0	0	0	0	0	0	0	0	0	0	0	0	0	0	0	0	0	0	0	0	0	0	0	0	0	0	0	0	0	0	0	0	0	0	0	0	0	0	0
SNORA44	0	0	0	0	0	0	0	0	0	0	0	0	0	0	0	0	0	0	0	0	0	0	0	0	0	0	0	0	0	0	0	0	0	0	0	0	0	0	0	0	0	0	0	0	0	0	0	0	0
SNORA16A	0	0	0	0	0	0	0	0	0	0	0	0	0	0	0	0	0	0	0	0	0	0	0	0	0	0	0	0	0	0	0	0	0	0	0	0	0	0	0	0	0	0	0	0	0	0	0	0	0
TAF12	54	117	42	62	46	47	497	34	66	30	181	59	170	23	51	150	120	256	210	130	5	51	37	60	316	147	307	108	234	222	221	237	210	208	90	80	28	14	75	15	71	27	114	77	62	50	64	95	38
RAB42	0	0	0	0	0	0	4	0	0	1	64	0	0	16	0	1	0	1	9	24	6	6	7	1	2	10	7	24	8	3	7	23	6	12	12	4	0	0	0	0	0	2	0	2	6	2	1	5	5
LINC01715	0	0	0	0	0	0	0	0	0	0	0	0	0	0	0	0	0	0	0	6	0	1	4	2	2	1	5	3	2	4	7	4	2	4	0	2	0	0	0	0	0	0	0	4	1	1	0	5	0
AL360012.1	0	0	0	0	0	0	0	0	0	0	0	0	0	0	0	0	0	0	0	0	0	0	0	0	0	0	0	0	0	0	0	0	0	0	0	0	0	0	0	0	0	0	0	0	0	0	0	0	0
RNU11	0	0	0	0	0	0	0	0	0	0	0	0	0	0	0	0	0	0	0	1	0	1	0	0	3	3	1	2	1	0	3	17	4	3	8	1	0	0	0	0	0	0	0	0	0	0	0	1	0
GMEB1	37	260	44	60	140	57	482	113	115	50	219	49	231	77	215	241	204	392	409	300	7	130	60	102	257	221	357	194	296	360	277	334	206	320	157	155	99	84	126	29	140	107	223	104	110	97	144	123	80
AL645729.1	0	0	0	0	0	0	0	0	0	0	0	0	0	0	0	0	0	0	0	1	0	0	0	0	0	0	0	0	0	0	0	1	0	0	0	0	0	0	0	0	0	0	0	1	0	0	0	0	0
YTHDF2	155	512	244	211	191	82	1270	291	219	101	978	103	732	121	107	581	374	1025	1070	658	4	146	39	194	701	530	1060	325	707	861	864	696	525	659	239	241	13	173	25	39	60	114	814	315	333	211	551	481	181
OPRD1	0	0	0	0	0	0	222	0	0	0	0	20	43	1	0	4	1	180	6	760	7	0	100	348	1083	241	2327	182	0	349	2704	5	2	762	106	1996	0	0	0	2	10	16	54	520	555	418	338	311	363
AL009181.2	0	0	0	0	0	0	0	0	0	0	0	0	0	0	0	0	0	0	0	1	0	1	0	0	0	2	1	0	1	1	0	0	1	0	3	0	0	0	0	0	0	0	0	0	0	0	0	0	2
AL009181.1	0	0	0	0	0	0	0	0	0	0	0	0	0	0	0	0	0	0	0	0	0	0	0	0	0	0	0	0	0	0	0	0	0	0	0	0	0	0	0	0	0	0	0	0	0	0	0	0	0
EPB41	446	1209	563	478	880	471	4331	742	359	697	983	404	2730	515	591	2550	1092	3574	3766	816	38	1410	185	695	1072	795	1315	727	883	1531	1269	1461	1038	745	448	851	596	327	750	146	765	551	743	235	431	325	774	674	354
AL138785.2	0	0	0	1	0	0	1	0	0	0	1	2	1	2	0	1	2	1	0	1	0	0	0	0	0	0	1	0	0	0	0	0	0	1	0	0	1	0	0	5	0	5	3	0	0	0	0	0	0
AL138785.1	0	0	0	0	0	0	0	0	0	0	0	0	0	0	0	0	0	0	0	0	0	1	0	1	0	0	0	0	0	1	0	0	0	0	0	0	0	0	0	0	0	0	0	0	0	0	0	0	2
AL138785.3	0	0	0	0	0	0	0	0	0	0	0	1	0	0	0	0	0	0	0	0	1	5	1	0	0	0	2	1	1	2	0	3	0	0	0	6	0	0	0	0	0	0	0	1	0	2	3	0	0
TMEM200B	0	5	0	0	2	0	2	8	15	0	0	0	1	4	0	35	18	3	0	88	1	0	64	24	16	69	12	72	2	39	27	116	20	21	39	11	0	0	0	0	0	0	0	5	5	2	6	3	9
AL357500.1	0	0	0	0	0	0	0	1	1	2	0	0	0	0	0	1	0	1	0	1	0	1	1	1	0	1	2	0	0	7	0	3	3	1	0	2	0	0	0	0	0	0	0	0	2	0	1	5	5
SRSF4	377	1720	584	487	1963	215	1468	2300	309	695	1034	379	1628	988	1263	2038	1692	1333	3363	734	24	522	279	638	567	568	944	523	856	825	610	1041	722	879	465	890	620	205	1431	667	1098	279	834	546	585	379	714	720	486
AL357500.2	0	0	0	0	0	0	0	0	0	0	0	0	0	0	0	0	0	0	0	0	0	0	0	0	0	0	0	0	0	0	0	0	0	0	0	0	0	0	0	0	0	0	0	0	0	0	0	0	0
MECR	41	134	41	27	102	26	135	125	79	73	0	25	185	63	9	73	101	158	314	163	3	56	48	86	153	113	209	98	256	151	191	147	115	129	39	220	53	65	122	24	142	45	145	64	79	60	106	58	31
AL590729.1	0	0	0	0	0	0	0	0	0	0	0	0	0	0	0	0	0	0	0	0	0	0	0	0	0	0	0	0	0	0	0	0	0	0	1	0	0	0	0	0	0	0	0	0	0	0	0	1	0
PTPRU	48	223	60	94	185	143	342	324	112	202	163	7	912	97	17	169	194	42	751	904	4	11	52	357	483	596	679	1709	289	296	2082	228	270	279	88	877	106	250	517	63	249	265	96	75	40	86	241	161	20
LINC01756	0	0	0	0	0	0	0	0	0	0	0	0	0	0	0	0	0	0	0	0	0	0	0	7	0	1	0	8	0	1	2	0	0	2	3	5	0	0	0	0	0	0	0	0	0	0	3	0	0
AL671862.1	0	0	0	0	0	0	0	0	0	0	0	2	0	0	0	0	0	0	0	0	0	0	0	0	0	0	0	1	0	1	0	0	0	0	0	0	0	0	0	0	0	0	0	0	0	0	0	0	0
AC092265.1	0	0	0	0	0	0	0	0	0	0	0	0	0	0	0	0	0	0	0	0	0	0	1	0	0	0	0	0	0	0	0	0	0	0	2	0	0	0	0	0	0	0	0	0	0	0	0	0	1
AL645944.2	0	0	0	0	0	0	0	0	0	0	0	0	0	0	0	0	0	0	0	0	0	0	0	1	0	0	0	0	0	1	0	0	0	0	1	1	0	0	0	0	0	0	0	0	0	0	0	0	1
AL645944.1	0	0	0	0	0	0	0	0	0	0	0	0	0	0	0	0	0	0	0	0	0	0	0	0	0	0	0	0	0	0	0	0	0	0	3	0	0	0	0	0	0	0	0	0	0	0	0	0	0
LINC01648	0	0	0	0	0	0	0	0	0	0	0	0	0	0	0	0	0	0	0	0	0	0	0	2	0	0	0	5	0	0	0	0	0	0	3	0	0	0	0	0	0	0	0	0	0	0	1	0	2
AL137076.1	0	0	0	0	0	0	0	0	0	0	0	0	0	0	0	0	0	0	0	0	0	0	0	0	0	0	0	0	0	0	0	0	1	0	0	0	0	0	0	0	0	0	0	0	0	0	0	0	0
AL021921.1	0	0	0	0	0	0	0	0	0	0	0	0	0	0	0	0	0	0	0	0	0	0	0	0	0	0	0	0	0	0	0	0	0	0	1	0	0	0	0	2	0	12	0	0	0	0	0	0	0
AL161638.2	0	0	0	0	0	0	0	0	0	0	0	0	0	0	0	0	0	0	0	0	1	0	0	0	0	0	0	0	0	0	0	0	0	0	0	0	0	0	0	0	0	0	0	0	0	0	0	0	0
AL161638.1	0	0	0	0	0	0	0	0	0	0	0	0	0	0	0	0	0	0	0	0	0	0	0	0	0	0	0	0	0	0	0	0	0	0	0	0	0	0	0	0	0	0	0	0	0	0	0	0	0
MATN1	0	1	0	0	0	0	0	0	0	5	0	0	6	0	0	2	0	1	6	0	2	0	2	0	2	0	1	2	0	4	4	2	0	2	12	0	3	1	0	12	1	29	2	1	1	0	1	1	1
MATN1-AS1	0	6	17	9	0	0	8	10	0	0	0	0	24	2	0	3	17	14	12	17	0	34	11	17	17	24	22	27	16	30	14	29	36	15	6	37	0	1	9	1	5	2	2	5	5	7	3	12	4
AL137857.1	0	0	0	0	0	0	2	0	0	0	0	0	0	0	0	0	0	0	0	0	0	1	0	0	0	0	0	0	0	0	0	0	2	1	2	1	0	0	0	0	0	0	0	0	0	0	0	0	1
LAPTM5	133	267	166	178	129	107	1082	102	133	373	113	26	477	179	4	246	439	1059	811	2286	88	1636	250	143	231	1246	734	1445	139	879	357	1158	150	1046	1574	171	0	49	37	159	86	77	401	37	360	85	184	130	139
MIR4420	0	0	0	0	0	0	0	0	0	0	0	0	0	0	0	0	0	0	0	1	0	0	0	1	0	1	0	1	0	2	0	0	0	0	0	1	0	0	0	0	0	0	0	0	1	0	0	0	0
AL137027.1	0	0	0	0	0	0	0	0	0	0	0	0	0	0	0	0	0	0	0	2	0	0	0	0	0	0	0	0	0	0	0	0	0	0	0	0	0	0	0	0	0	0	0	0	0	0	0	0	1
LINC01778	0	0	0	0	0	0	0	0	0	0	0	0	0	0	0	0	0	0	0	2	0	0	4	0	9	1	1	0	1	2	1	0	0	0	6	1	0	0	0	0	0	0	0	3	1	2	0	0	0
RN7SKP91	0	0	0	0	0	0	0	0	0	0	0	0	0	0	0	0	0	0	0	0	0	0	0	0	7	4	1	1	2	3	12	4	5	3	1	2	0	0	0	0	0	0	0	0	0	1	0	1	0
AL445235.1	0	0	0	0	0	0	0	0	0	0	0	0	0	0	0	0	0	0	0	0	0	0	0	0	0	0	0	0	0	0	0	0	0	0	0	0	0	0	0	0	0	0	0	0	0	0	0	0	0
SDC3	9	183	1	30	65	0	129	130	0	125	56	36	193	154	43	51	126	147	184	1723	10	253	294	940	567	1414	1455	1068	311	613	1132	1023	345	550	285	876	4	15	31	26	19	35	62	115	75	149	91	165	117
RN7SL371P	0	0	0	0	0	0	0	0	0	0	0	0	0	0	0	0	0	0	0	0	0	0	0	0	0	0	0	0	0	0	0	0	0	0	0	0	0	0	0	0	0	0	0	0	0	0	0	0	0
PUM1	936	2649	796	1228	1816	780	5754	2037	1395	989	2462	473	4633	1171	1093	5404	2690	5742	5263	1822	23	480	281	823	2277	1577	3335	983	2163	1855	2970	2004	1995	2008	715	1162	558	905	1061	142	1313	612	3585	1055	831	694	1133	1077	450
AL356320.2	0	0	0	0	0	0	0	0	0	0	0	0	0	0	0	0	0	0	0	0	0	0	0	0	0	0	0	0	0	0	0	0	0	0	2	0	0	0	0	0	0	0	0	0	0	0	0	0	0
AL356320.1	0	0	0	0	0	0	0	0	0	0	0	0	0	0	0	1	0	0	0	0	0	0	0	0	0	0	0	0	0	0	0	0	0	0	0	0	0	0	0	0	0	0	0	0	0	0	0	0	0
SELENOWP1	0	0	0	0	0	1	0	0	0	0	0	0	2	0	0	29	0	0	0	0	0	0	0	0	0	1	2	0	0	3	3	0	0	1	1	0	0	0	0	0	0	2	0	0	0	0	0	0	0
AC114495.1	0	1	0	0	0	0	1	0	0	0	12	0	0	0	0	439	0	0	0	0	0	0	0	0	1	0	0	0	0	0	0	0	0	0	2	0	1	0	0	5	0	17	0	0	0	0	0	0	2
NKAIN1	0	4	7	0	0	0	3	0	0	0	22	0	1	0	0	0	0	1	61	10	0	0	0	17	15	3	3	10	0	21	21	0	0	4	11	6	0	12	1	3	0	10	0	0	2	1	4	2	1
SNRNP40	228	404	212	429	288	53	1073	263	122	247	406	91	529	203	284	363	324	800	1033	414	5	128	65	173	622	363	711	246	531	444	634	501	309	426	118	231	23	147	74	46	110	107	666	258	217	138	223	279	91
AC114495.2	2	1	0	4	1	7	13	0	0	0	27	3	8	0	0	24	0	13	9	5	0	4	0	11	3	6	9	8	1	4	0	7	4	6	3	9	0	2	0	0	0	0	0	8	8	1	8	4	7
ZCCHC17	177	393	129	199	182	89	816	225	16	79	868	79	383	86	65	358	333	602	744	308	0	55	25	124	511	213	698	148	395	341	496	304	339	413	154	156	211	140	289	179	276	129	493	172	123	96	140	185	81
AL451070.1	0	0	0	0	0	0	1	0	0	0	0	0	0	0	0	1	0	0	1	0	0	0	0	0	0	0	0	0	0	0	0	0	0	0	1	0	0	0	2	1	0	9	0	0	0	0	0	0	0
FABP3	4	87	44	4	41	0	45	15	0	11	0	0	9	13	44	245	19	33	140	68	6	2	7	2	11	23	32	28	12	30	9	54	17	50	55	7	4	0	0	14	7	27	14	2	10	2	2	8	12
SERINC2	9	227	92	120	24	47	203	96	64	145	111	67	31	293	0	20	120	63	100	85	0	2	5	69	77	43	35	30	377	21	92	145	154	60	16	47	7	11	36	61	7	44	43	0	1	1	3	9	5
AC209007.1	0	0	0	0	0	0	1	1	0	0	0	0	0	2	1	0	0	0	0	0	0	0	0	1	1	2	5	1	8	7	6	5	1	4	1	1	0	0	0	6	0	8	0	1	0	1	0	0	2
RNU6-40P	0	0	0	0	0	0	0	0	0	0	0	0	0	0	0	0	0	0	0	0	0	0	0	0	0	2	0	0	1	0	1	1	2	1	0	1	0	0	0	0	0	0	0	0	0	0	0	0	0
LDC1P	0	0	0	0	0	0	0	0	0	0	0	0	0	0	0	0	0	1	0	0	2	6	0	0	0	0	0	0	0	2	0	1	0	1	4	0	1	0	0	0	0	4	0	0	0	0	0	0	2
AC209007.2	0	0	0	0	0	0	0	0	0	0	0	0	0	0	0	0	0	0	0	0	0	0	0	0	0	0	0	0	0	0	0	0	0	0	0	0	0	0	0	0	0	0	0	0	0	0	0	0	0
LINC01226	0	0	0	0	0	0	2	0	0	0	0	0	0	1	0	0	0	1	0	0	0	13	0	0	1	0	0	0	0	1	0	1	0	1	14	1	0	0	0	0	0	0	0	0	0	0	3	0	0
AC114488.1	0	0	0	0	0	0	0	0	0	0	0	0	0	0	0	0	0	0	0	0	0	0	3	4	1	2	0	0	2	1	5	6	4	2	0	4	0	0	0	0	0	0	0	0	0	0	1	3	0
TINAGL1	32	343	10	29	100	49	139	106	44	8	37	66	81	75	91	42	158	155	107	1506	9	28	401	405	462	994	358	457	1622	615	773	1067	613	354	305	277	21	21	72	19	98	66	96	57	39	28	36	104	65
HCRTR1	0	2	0	1	0	3	1	0	0	0	8	0	0	2	0	0	0	0	0	0	1	0	0	1	2	1	0	0	10	2	1	11	1	1	0	2	0	0	0	11	1	33	0	1	0	0	0	1	0
PEF1	39	169	47	74	129	27	240	78	14	6	233	16	201	23	15	87	105	222	159	763	9	60	48	192	848	737	874	320	3437	587	1038	1322	992	640	161	371	21	148	25	19	73	83	281	146	148	95	166	232	151
PEF1-AS1	0	0	0	0	0	0	0	0	0	0	0	0	0	1	0	0	0	0	1	2	0	0	0	1	2	4	0	0	4	1	1	6	5	1	3	0	0	0	0	5	0	13	0	1	1	0	0	0	2
AC114488.2	0	0	0	0	0	0	0	0	0	0	0	0	0	0	0	0	0	0	0	0	0	0	0	1	0	1	1	0	1	2	0	1	1	0	1	0	0	0	0	0	0	0	0	0	0	1	1	0	0
COL16A1	74	965	17	33	2471	118	566	1104	499	647	75	145	68	854	199	218	1143	299	817	1396	51	93	242	301	434	1047	1361	571	1655	1814	192	1053	675	698	386	402	74	90	1178	607	399	252	386	32	19	24	96	141	99
ADGRB2	8	94	0	77	311	94	235	80	79	58	195	7	46	366	19	63	47	388	182	33	1	16	15	59	50	114	40	26	146	215	140	130	110	22	11	42	8	47	21	39	75	61	28	4	3	2	12	5	5
MIR4254	0	0	0	0	0	0	0	1	0	0	0	0	0	0	0	0	0	0	0	0	0	0	0	0	0	0	0	0	0	0	0	0	0	0	0	0	0	0	0	0	0	0	0	0	0	0	0	0	0
AL354919.2	0	0	0	0	0	0	0	0	0	0	0	0	0	0	0	0	0	0	0	0	0	0	1	0	0	0	0	0	0	0	0	0	0	0	0	0	0	0	0	0	0	0	0	0	0	0	0	0	0
SPOCD1	1	11	0	0	2	0	12	7	0	2	0	0	6	27	0	2	22	26	11	8	0	0	4	2	8	6	15	4	4	3	6	5	0	4	25	6	0	1	0	14	7	27	1	0	4	4	0	0	2
AL354919.1	0	0	0	0	1	0	0	0	0	0	0	0	0	0	0	0	0	0	0	0	0	0	0	0	0	0	0	0	0	0	0	0	0	1	11	0	0	0	0	0	0	0	0	0	0	0	1	0	1
AL136115.2	0	0	0	0	0	0	3	0	0	0	2	0	0	0	0	0	0	1	0	20	0	16	0	5	0	1	5	12	1	10	1	8	4	13	14	3	0	0	0	0	0	0	0	7	11	8	24	5	16
PTP4A2	828	1078	350	560	486	412	7062	560	136	351	1384	204	1419	383	937	1954	941	3665	1463	1413	49	682	150	512	3080	1897	2850	1338	3083	2343	2192	5312	4028	2880	1298	491	21	180	39	72	70	177	548	834	665	499	915	998	1083
AL136115.1	0	0	0	0	0	0	1	0	0	0	0	0	0	0	0	0	0	0	0	0	0	0	0	0	0	0	0	1	0	0	0	0	0	0	0	0	0	0	0	0	0	0	0	0	0	0	0	0	0
AL136115.3	0	0	0	0	0	0	0	0	0	0	0	0	0	2	0	2	0	0	0	0	0	0	0	0	0	1	0	0	0	1	0	0	0	0	0	1	0	0	0	0	0	1	0	0	0	0	0	0	0
KHDRBS1	232	1083	302	485	761	170	1935	675	246	604	2104	222	1238	415	460	1118	886	1581	2867	1463	27	593	252	672	1662	1671	2064	1046	1324	1685	1886	2337	1399	1695	683	706	63	709	168	159	383	283	2392	587	508	451	1019	600	448
AL445248.1	0	0	0	0	0	0	1	0	0	0	0	0	0	0	0	0	0	0	0	2	0	0	0	1	0	0	0	0	1	1	0	0	0	0	0	1	0	0	0	0	0	2	0	2	2	0	1	1	1
TMEM39B	44	116	109	49	69	53	254	162	20	63	60	15	213	51	0	44	72	274	167	134	2	28	40	63	103	106	212	102	128	124	147	148	73	76	34	148	4	64	60	25	88	43	211	34	37	31	77	49	20
MIR5585	0	0	0	0	0	0	0	0	0	0	0	0	0	0	0	0	0	0	0	0	0	2	2	2	0	0	3	2	0	7	0	0	0	1	1	1	0	0	0	0	0	0	0	2	0	1	2	1	2
AL445248.2	0	0	0	0	0	0	1	1	0	0	0	0	0	0	0	0	0	0	0	0	0	0	0	0	0	1	0	0	0	0	0	0	0	0	0	0	0	0	0	0	0	0	0	0	0	0	0	0	0
KPNA6	256	930	330	221	867	165	1742	766	266	450	650	137	1034	289	663	596	739	1483	1254	1994	7	240	158	751	2125	1506	3483	917	2061	1753	3087	1327	989	1548	579	1204	81	702	192	49	475	293	1842	734	870	550	1126	965	808
AL049795.2	0	0	0	0	0	0	0	0	0	0	0	0	0	0	0	0	0	0	0	0	0	0	0	0	0	0	0	0	0	0	0	0	0	0	0	0	0	0	0	0	0	0	0	1	0	1	0	0	0
TXLNA	258	814	165	310	459	179	1058	803	150	159	415	213	948	292	252	531	733	1052	1268	2328	24	382	581	854	2140	1469	3717	1124	1830	2126	2735	1509	1069	1640	617	1684	634	317	1589	165	811	170	1198	745	547	447	543	902	587
CCDC28B	2	22	33	28	13	0	44	61	15	1	0	0	20	12	0	10	7	49	10	69	1	14	19	23	108	45	113	41	35	77	104	38	22	37	15	58	4	13	6	8	25	17	45	24	20	10	31	16	10
AL049795.1	20	113	61	20	122	7	49	211	46	12	20	9	110	54	0	95	89	106	39	41	1	8	19	56	13	20	52	28	21	22	18	26	23	24	6	137	1	17	7	9	28	22	11	18	19	33	27	16	28
IQCC	36	44	0	44	95	2	154	21	1	6	56	12	100	18	0	39	38	168	129	95	2	10	29	31	131	80	223	33	114	65	122	105	106	123	33	75	268	75	840	410	146	77	192	32	41	23	30	53	10
DCDC2B	6	0	0	0	0	0	2	4	0	0	0	0	0	1	0	0	7	2	0	2	0	0	0	0	2	2	1	0	0	2	0	1	0	1	1	2	5	0	0	20	0	26	2	0	0	0	2	0	0
TMEM234	33	182	79	4	476	64	153	826	124	89	43	36	272	106	47	143	256	285	155	204	4	75	119	258	190	145	404	117	241	187	185	225	177	198	54	513	25	58	168	7	159	55	130	140	104	92	133	130	36
EIF3I	159	586	377	229	331	94	1416	357	106	231	1106	193	595	318	188	683	430	872	1915	1054	13	126	103	250	1120	984	1651	562	2401	1203	1203	1264	927	706	315	256	25	585	130	87	224	258	2231	277	250	186	283	514	61
MTMR9LP	0	1	0	0	0	0	3	1	0	0	0	1	0	2	0	0	0	2	1	157	2	27	320	203	104	164	182	96	91	416	136	222	94	105	38	366	0	0	0	0	0	0	0	59	34	61	47	41	22
FAM167B	0	3	1	0	3	0	3	0	0	0	0	2	0	2	0	1	0	1	0	36	0	3	22	14	31	57	30	16	40	24	62	25	26	21	3	29	0	3	7	0	3	0	1	3	2	3	4	5	4
LCK	6	39	0	21	39	6	169	48	5	204	3	32	59	79	4	31	75	256	159	9	4	580	24	3	4	123	6	123	14	28	11	65	11	32	31	12	2	6	15	22	10	36	20	0	10	1	7	4	2
AL121991.1	0	0	0	0	0	0	0	0	0	0	0	0	0	0	0	0	0	0	0	0	0	0	0	0	0	0	0	0	0	0	0	0	0	0	0	0	0	0	0	0	0	0	0	0	0	0	0	0	0
AL109945.2	0	0	0	0	0	0	0	0	0	0	0	0	0	0	0	0	0	0	0	0	0	0	0	0	0	0	0	0	0	0	0	0	0	2	0	0	0	0	0	0	0	1	0	0	0	0	0	0	0
HDAC1	286	1525	411	473	1171	389	2137	1616	606	612	607	319	1603	556	365	658	1275	1902	2078	679	9	297	203	318	1210	697	1286	407	2225	831	1169	991	1077	712	235	524	229	706	932	511	618	416	2983	543	273	234	823	493	139
MARCKSL1	25	152	52	306	168	54	254	273	379	434	0	62	137	314	79	198	132	167	349	242	3	344	133	226	835	652	184	200	2203	315	650	1063	656	272	52	261	0	23	6	12	19	7	23	55	12	35	487	85	102
AL109945.1	0	0	0	0	0	0	0	0	0	0	0	0	0	0	0	0	0	0	0	0	2	2	1	0	3	0	1	0	0	1	0	0	4	2	2	6	0	0	0	0	0	0	0	0	0	0	1	0	0
TSSK3	5	10	3	0	116	0	8	31	0	0	0	1	10	7	0	22	6	12	8	8	0	5	2	19	2	6	6	6	9	4	2	11	10	12	0	32	0	1	0	5	9	20	1	9	5	3	5	6	5
FAM229A	30	104	92	50	77	12	66	134	144	55	1	10	106	25	144	14	144	139	79	51	0	33	30	44	37	39	47	25	75	58	25	49	41	37	14	97	0	8	2	1	16	10	22	28	31	9	28	19	26
BSDC1	97	353	224	173	415	123	664	645	67	201	192	84	556	231	118	131	389	644	374	1637	12	290	394	628	1543	965	2676	618	1782	1664	1965	1060	833	1062	310	1170	182	317	307	29	533	114	430	397	509	301	578	751	272
GAPDHP20	0	0	0	0	0	0	0	0	0	0	0	0	0	0	0	0	0	0	0	0	0	0	0	1	0	0	0	0	0	0	0	0	0	0	0	0	0	0	0	0	0	0	0	0	0	0	0	0	0
AL356986.1	0	0	0	0	0	0	2	0	0	0	0	0	0	0	0	0	0	0	0	0	0	0	0	0	0	0	0	0	1	0	0	0	0	0	0	0	0	0	0	0	0	0	0	1	1	0	0	0	1
LRRC37A12P	0	0	0	0	0	0	0	3	0	0	9	0	0	0	49	7	0	0	0	0	1	0	0	0	0	0	0	0	0	0	0	0	0	0	3	0	1	0	0	6	0	8	0	0	0	0	0	0	1
RN7SL122P	0	0	0	0	0	0	0	0	0	0	0	0	0	0	0	0	0	0	0	0	0	0	1	0	2	5	3	3	2	12	5	3	1	6	3	1	0	0	0	0	0	0	0	0	0	0	0	0	0
AL033529.1	0	1	0	0	0	0	0	0	0	0	0	0	0	0	0	0	0	0	0	0	0	0	0	0	0	0	0	0	0	0	0	0	0	0	0	0	3	0	0	0	0	10	0	0	0	0	0	0	0
ZBTB8B	0	1	2	0	0	0	23	0	1	0	0	0	1	6	0	3	0	7	0	2	2	1	4	19	23	3	39	7	2	44	25	1	5	20	28	20	0	0	0	0	0	1	3	24	49	10	62	6	9
ZBTB8A	0	5	2	1	6	2	30	11	5	10	2	0	6	37	0	12	4	7	6	76	11	9	14	58	161	106	59	79	88	129	106	272	182	156	58	33	0	0	0	0	0	0	0	47	40	32	73	50	40
ZBTB8OS	359	469	369	328	110	59	1736	178	80	14	619	57	706	72	222	596	440	1025	656	200	11	79	38	127	363	138	387	127	222	233	293	259	228	291	125	184	31	101	50	50	106	126	596	170	152	87	214	175	119
AC114489.1	0	0	0	0	0	0	0	0	0	0	0	0	0	0	0	0	0	0	0	0	0	0	0	0	0	0	0	0	0	0	0	0	0	0	0	0	0	0	0	0	0	0	0	0	1	0	0	1	0
RBBP4	896	1984	582	1065	1028	636	7092	1343	524	1162	3447	280	2364	807	866	2357	1539	4606	4722	2175	33	475	174	785	2005	1344	2575	1079	1516	1961	2345	1730	1639	1912	437	898	60	710	150	166	382	473	2828	1414	1282	742	2587	1563	1227
SYNC	2	432	0	3	104	27	34	45	1	0	0	5	18	23	290	23	148	27	43	48	4	3	7	18	90	138	15	119	143	74	99	222	81	67	46	19	12	13	50	18	10	67	13	7	6	8	10	27	12
AC114489.2	0	0	0	0	0	0	0	0	0	0	0	0	0	0	0	0	0	0	0	0	0	0	0	0	0	0	1	0	0	0	0	0	1	0	0	0	0	0	0	0	0	0	0	0	0	1	0	1	0
KIAA1522	103	396	17	323	355	74	256	471	146	20	69	58	85	165	69	360	385	34	40	1320	12	9	167	636	668	1004	766	356	1335	760	785	1421	688	552	160	1117	43	62	91	16	38	39	173	40	216	43	556	208	223
YARS1	204	778	420	365	711	375	2283	798	313	781	1616	562	995	833	167	1747	674	1735	3184	749	16	163	207	198	455	435	940	298	865	763	666	538	423	598	293	341	272	213	329	127	325	331	880	263	337	143	553	514	137
S100PBP	64	505	186	94	1123	136	673	1202	208	136	111	254	698	305	164	353	571	693	613	495	20	308	169	441	561	324	873	353	310	681	543	554	411	516	211	749	124	151	311	46	577	95	427	478	535	254	644	478	309
FNDC5	0	32	0	0	41	0	20	2	13	10	98	1	21	1	85	6	3	22	135	489	4	1	75	77	354	65	442	29	17	807	247	30	37	163	134	115	2	13	9	12	58	23	7	120	178	44	266	738	25
HPCA	4	21	0	21	47	10	16	132	50	44	48	0	9	5	0	5	21	10	49	16	0	1	2	8	9	3	16	0	5	4	9	3	8	10	10	1	0	22	46	8	60	18	83	0	2	1	5	6	1
TMEM54	10	89	9	32	50	10	31	88	35	2	8	0	40	63	7	2	123	9	8	157	2	0	25	40	260	165	188	33	486	146	288	194	172	95	23	72	0	65	2	2	14	6	129	26	10	18	24	51	15
AL031602.2	0	0	0	0	0	0	0	0	0	0	0	0	0	7	0	0	0	0	0	0	0	0	0	0	0	0	0	0	0	0	0	0	0	0	0	0	0	0	0	0	0	15	0	0	0	0	0	0	0
RNF19B	167	294	175	161	263	80	649	133	100	88	99	74	484	131	27	224	258	549	366	508	7	81	106	100	230	536	387	309	303	502	338	330	188	330	281	201	23	190	146	45	154	170	955	65	106	70	129	110	60
AL031602.1	1	0	0	0	0	0	2	0	1	0	1	1	0	0	3	2	0	2	0	0	0	2	0	1	0	1	0	0	0	0	1	0	1	0	1	0	3	0	0	1	0	2	0	0	1	0	0	1	0
AL355864.1	0	0	0	0	0	0	0	0	3	0	0	0	0	0	0	0	0	0	0	0	0	0	0	0	0	0	0	0	0	0	0	1	0	0	0	0	0	0	0	1	0	3	0	0	0	0	0	0	0
AL355864.2	0	0	0	0	0	0	0	0	0	0	0	0	0	0	0	0	0	0	0	0	0	0	0	0	0	0	0	0	0	0	0	0	0	0	2	0	0	0	0	1	0	0	0	0	0	0	0	0	0
AL020995.1	0	0	0	0	0	0	0	0	0	0	0	0	0	0	0	0	0	0	0	0	0	0	0	0	0	0	0	0	0	0	0	0	0	0	0	0	0	0	0	0	0	9	0	0	0	0	0	0	1
AK2	2587	4158	2046	2044	1706	908	12671	1791	987	984	2993	800	6657	898	1589	4051	3322	8929	5489	931	14	293	137	447	1093	695	1392	463	1176	927	918	1161	1387	1206	312	927	447	1010	1810	345	1679	822	4552	591	608	329	753	750	441
AL020995.2	0	0	0	0	0	0	5	1	0	0	0	0	0	0	0	0	0	0	0	0	1	4	3	5	6	1	3	2	2	3	1	4	2	1	4	12	0	0	1	0	0	0	0	6	3	2	3	3	2
AZIN2	16	51	24	22	126	3	72	132	0	1	0	5	76	23	0	18	29	64	63	101	5	34	43	48	55	61	58	57	97	48	88	67	53	70	30	181	25	65	122	25	144	34	126	48	35	19	46	66	44
AL662907.1	0	0	0	0	0	0	0	0	0	0	0	0	0	0	0	1	0	0	0	12	1	8	0	15	3	9	7	5	1	10	11	9	4	8	6	18	0	0	0	0	0	0	0	9	15	5	21	6	4
TRIM62	5	51	0	21	53	19	72	68	1	68	46	6	81	45	1	30	67	94	182	169	1	75	43	103	66	106	131	80	97	113	101	101	36	71	23	120	0	17	58	35	82	13	57	23	48	15	57	36	14
AL662907.2	0	0	6	0	1	0	4	0	5	0	0	0	2	0	0	0	1	1	0	4	2	1	2	5	1	1	6	6	7	10	4	12	14	5	7	32	0	0	0	0	1	0	0	5	11	1	18	3	15
AL662907.3	0	0	7	0	0	2	1	0	0	0	0	0	0	0	0	0	0	0	0	2	1	0	0	7	3	0	1	2	2	1	0	5	3	2	12	6	0	0	0	0	0	0	0	3	2	1	20	0	5
ZNF362	286	540	175	253	134	123	1315	192	135	175	58	21	786	119	279	709	401	849	465	440	7	95	143	170	283	385	319	259	413	273	299	619	292	347	124	291	25	228	217	55	153	42	498	67	61	43	146	50	77
AL513327.2	0	0	0	0	0	0	1	0	0	0	0	0	1	0	0	0	0	1	0	7	0	2	2	3	0	1	8	4	0	3	1	4	3	3	0	21	0	0	0	0	0	0	0	10	13	7	22	3	5
A3GALT2	5	11	0	0	11	24	4	6	0	0	0	2	27	6	0	3	13	7	6	2	0	0	2	1	0	0	0	1	0	1	0	2	1	0	1	0	0	0	0	2	1	14	0	1	0	1	0	1	0
AL513327.1	0	1	0	0	0	0	2	0	0	0	0	0	0	0	0	39	4	0	0	2	0	0	0	0	0	2	1	2	0	1	1	1	5	0	7	0	0	0	0	0	0	2	0	1	0	1	1	0	1
PHC2	209	579	59	364	580	156	613	474	79	114	225	75	1027	134	57	145	612	692	612	1824	13	124	348	541	912	983	1488	687	1689	1628	1059	1205	683	893	593	840	46	276	199	79	352	90	718	294	282	188	466	477	150
MIR3605	0	0	0	0	0	0	0	0	0	0	0	0	0	0	0	0	0	1	3	5	0	1	1	1	0	5	2	4	0	3	0	0	2	1	0	4	0	0	0	0	0	2	0	4	2	1	5	4	1
RN7SKP16	0	0	0	0	0	0	0	0	0	0	0	0	0	0	0	1	0	0	0	16	0	0	5	17	8	5	4	8	16	19	4	6	5	11	7	21	0	0	0	0	0	0	0	12	10	3	22	22	8
PHC2-AS1	0	0	0	0	0	0	0	0	0	0	0	0	0	0	0	0	0	0	0	0	0	0	0	7	0	1	1	3	3	3	0	0	6	0	0	4	0	0	0	0	0	0	0	4	2	1	3	0	4
TLR12P	0	0	0	0	0	0	0	0	0	0	0	0	0	0	0	0	0	0	0	0	1	0	0	0	0	0	0	1	0	0	0	2	0	0	2	0	0	0	0	0	0	0	0	0	0	0	1	0	0
ZSCAN20	12	93	23	34	67	19	198	119	45	57	77	24	134	24	44	54	79	123	118	107	0	32	33	89	119	86	182	60	99	153	168	144	117	121	40	146	14	44	32	11	42	70	67	84	74	54	101	126	34
AC115285.1	0	0	0	0	0	0	1	0	0	0	0	0	0	0	0	0	0	0	0	0	2	0	0	0	0	0	0	0	0	2	0	0	1	0	6	0	0	0	0	1	0	0	0	0	0	0	0	0	0
CSMD2	3	330	0	914	434	38	100	589	380	10	783	10	84	87	103	29	607	154	151	59	6	36	67	116	3	18	56	1094	8	1077	18	12	15	13	72	32	31	9	20	108	13	380	14	35	19	5	426	192	20
HSPD1P14	0	0	0	0	0	0	0	0	0	0	0	0	0	0	0	0	0	0	0	0	1	0	0	0	0	0	0	17	0	0	0	0	0	1	4	0	0	0	0	0	0	0	0	0	0	0	1	0	0
HMGB4	0	0	0	0	0	1	0	0	0	0	8	0	0	0	0	0	0	0	0	0	0	0	0	0	0	0	0	16	0	0	0	0	0	0	1	0	0	0	0	0	0	26	0	0	0	0	0	0	0
CSMD2-AS1	0	0	0	0	0	0	0	0	0	0	0	0	0	0	0	0	0	0	0	0	2	0	0	0	0	0	0	16	0	3	0	1	0	0	2	0	0	0	0	0	0	0	0	0	0	0	0	0	0
RNA5SP42	0	0	0	0	0	0	0	0	0	0	0	1	0	0	0	0	0	1	0	0	0	0	0	0	0	0	0	0	0	0	0	1	0	0	0	0	0	0	0	0	0	0	0	0	0	0	0	0	0
C1orf94	0	1	0	0	0	0	0	1	0	0	0	0	0	0	0	0	6	1	0	0	0	0	0	1	1	1	0	3	0	6	0	0	0	0	4	0	7	0	3	17	1	51	1	0	0	0	0	1	0
AC115286.1	0	0	0	0	0	0	0	0	0	0	0	0	0	0	0	0	0	0	0	0	0	0	0	0	0	0	0	0	0	0	0	0	0	0	0	0	0	0	0	0	0	0	0	0	0	0	0	0	0
AC099565.1	0	0	0	0	0	0	0	0	0	0	0	0	0	0	0	0	0	0	0	2	0	0	0	0	0	0	1	15	0	5	0	0	0	1	3	0	0	0	0	0	0	0	0	1	1	2	43	3	1
MIR552	0	0	0	0	0	0	0	0	0	0	0	0	0	0	0	0	0	0	0	0	0	0	0	0	0	0	2	3	0	0	0	0	0	0	0	0	0	0	0	0	0	0	0	0	0	0	2	0	0
SMIM12	41	148	62	16	179	54	203	183	49	102	39	34	145	52	0	155	129	152	153	416	8	79	61	182	434	337	733	313	555	423	541	494	322	404	245	258	6	104	61	28	61	54	347	148	139	138	214	192	121
GJB5	0	0	0	0	0	0	0	0	0	0	0	1	0	3	0	1	12	0	0	0	0	0	0	5	0	3	20	0	0	15	0	0	0	0	2	0	3	0	1	3	0	55	0	0	0	0	0	0	0
GJB4	5	1	0	0	0	0	0	1	0	0	0	0	0	7	0	0	2	0	1	0	0	0	0	0	0	5	0	0	0	0	0	0	0	0	0	0	15	0	0	11	1	32	1	0	0	0	0	0	1
AL121988.1	0	1	0	0	2	4	2	0	4	0	0	0	0	1	0	12	0	4	1	0	0	0	2	1	2	0	0	0	4	0	1	1	3	0	0	3	4	0	0	0	0	21	0	0	0	3	2	0	1
GJB3	0	27	0	0	0	0	0	0	0	0	0	9	0	7	0	2	3	0	5	2	0	0	0	0	0	2	1	0	0	4	7	2	2	3	1	0	6	0	0	1	0	23	0	0	0	1	1	0	1
GJA4	10	47	18	46	62	57	71	9	26	8	1	1	52	6	0	39	16	48	45	1440	2	20	106	125	85	213	234	121	552	339	224	436	93	175	98	56	0	16	8	4	11	14	52	11	13	10	22	39	9
AL122010.1	0	0	0	0	0	0	0	0	0	0	0	0	0	0	0	0	0	0	0	2	0	0	0	0	0	0	0	0	0	0	1	0	0	0	1	0	0	0	0	0	0	0	0	0	0	0	0	1	0
DLGAP3	95	41	56	19	168	52	128	59	227	26	42	20	143	65	0	27	94	130	23	66	3	3	27	81	49	72	123	143	4	161	77	2	5	52	17	64	15	167	100	108	95	81	662	1	15	14	28	20	7
AC114490.3	0	0	1	0	0	0	1	0	0	0	0	0	0	0	0	1	0	2	0	6	1	14	1	12	9	5	8	16	7	9	3	15	9	9	7	13	0	0	0	0	0	0	0	2	4	7	0	5	3
AC114490.1	0	0	0	0	1	0	0	0	0	0	0	0	0	0	0	1	0	4	0	2	0	8	0	9	1	5	5	9	1	3	5	6	5	3	2	7	0	0	0	0	0	0	0	2	2	1	6	5	8
AC114490.2	0	0	0	0	0	0	0	0	0	0	0	0	0	0	0	0	0	0	0	0	0	0	0	0	0	0	0	0	0	0	0	0	0	0	0	0	0	0	0	0	0	0	0	0	0	0	0	0	0
TMEM35B	0	0	0	0	0	0	0	0	0	0	0	0	1	0	0	0	0	1	0	0	0	0	1	0	0	0	0	0	0	0	0	0	0	0	0	0	0	8	0	1	0	2	22	0	1	0	0	0	0
ZMYM6	48	132	45	51	96	16	418	98	43	3	10	18	210	11	217	311	114	340	184	127	4	177	23	230	339	139	366	262	134	197	274	257	232	312	97	206	6	33	11	14	16	57	77	256	247	157	212	222	108
ZMYM1	116	276	244	196	311	114	1421	147	92	53	878	75	423	70	197	861	373	992	664	96	6	135	29	227	499	244	465	279	152	238	385	449	484	402	97	121	18	89	22	51	48	198	251	239	203	131	219	215	94
RPL12P45	0	0	0	0	0	0	0	0	0	0	0	0	0	0	0	0	0	0	0	0	0	0	0	0	0	0	0	0	0	0	0	0	0	0	0	0	0	0	0	0	0	0	0	0	0	0	0	0	1
EFCAB14P1	0	3	0	0	17	0	1	24	0	0	0	1	1	2	0	7	14	2	1	0	0	3	0	0	4	10	5	1	15	6	4	11	0	2	1	2	1	1	0	11	4	27	0	1	1	0	0	1	1
AL590434.2	0	0	0	0	0	0	0	0	0	0	0	0	0	0	0	0	0	0	0	0	0	1	0	5	2	0	0	0	2	0	0	0	1	0	0	0	0	0	0	0	0	0	0	0	0	1	0	0	1
SFPQ	1980	4936	1031	2191	5878	1422	7001	5037	1456	2651	5638	1550	6568	3421	1789	7331	5337	8997	13648	2550	25	1898	1258	2216	2609	2556	3829	2470	2068	3399	2083	2517	2369	3719	2255	2862	31914	2014	50106	3077	15037	1517	7218	2400	2408	1505	3623	2775	1863
AL590434.1	0	0	0	0	0	0	0	0	0	0	0	0	0	0	0	0	0	0	0	0	0	0	0	0	0	0	0	0	0	0	0	1	0	0	0	1	0	0	0	0	0	0	0	0	1	0	0	0	0
ZMYM4	1678	3472	1853	2015	3089	1323	13063	2717	1458	929	3228	337	4816	695	2854	7446	3458	7161	4985	1207	24	483	213	993	2339	1212	2586	1332	1553	1537	2500	2151	2047	2027	627	1206	272	628	517	286	662	839	2608	1014	946	652	1272	929	672
RN7SL503P	0	0	0	0	0	0	0	0	0	0	0	0	0	0	0	0	0	0	0	0	11	5	43	23	2	16	20	28	4	62	20	4	5	4	5	42	0	0	0	0	0	0	0	0	0	0	0	0	0
AL160000.1	5	4	0	0	7	0	11	0	0	20	15	0	8	0	0	17	1	10	5	2	1	5	0	5	0	0	0	0	1	0	1	2	1	1	1	5	0	0	0	0	0	2	0	3	2	1	2	3	7
RPL5P4	19	19	12	14	53	11	83	61	35	1	89	19	60	10	21	218	30	67	68	22	2	19	2	27	11	5	18	11	6	15	7	14	12	14	2	50	1	3	23	0	8	24	22	17	27	17	23	18	20
ZMYM4-AS1	0	0	0	0	0	3	2	0	0	0	0	0	0	0	0	0	0	0	6	0	0	0	0	0	0	0	0	0	2	0	0	0	0	0	1	0	0	0	0	2	0	17	0	0	0	0	0	0	0
AL356362.1	0	0	0	3	0	1	0	0	3	0	0	0	0	1	0	0	0	0	1	1	0	0	0	0	0	2	0	0	0	0	3	0	0	0	0	0	0	0	0	0	0	0	0	1	0	1	0	0	0
KIAA0319L	749	1541	859	552	1248	359	5768	1002	683	205	977	251	2785	385	53	1158	1247	5874	1166	1443	7	371	220	796	1391	980	2450	714	2203	1854	2056	1357	1184	1259	250	1336	226	1037	320	99	736	377	1828	432	744	331	882	895	328
AC004865.1	0	0	0	0	0	0	0	0	0	0	0	0	0	0	0	0	0	0	0	0	0	0	0	0	0	0	0	0	0	0	0	0	1	0	1	0	0	0	0	0	0	0	0	0	0	0	0	0	0
NCDN	40	163	25	43	153	34	316	257	46	117	262	56	216	74	88	124	148	320	238	674	2	97	128	283	384	476	1090	397	505	565	784	330	231	336	93	583	6	363	38	15	65	36	342	24	102	60	92	150	69
AC004865.2	0	0	0	0	7	0	0	8	0	3	0	0	0	2	0	1	0	3	1	4	0	19	4	3	3	2	1	7	8	6	3	2	0	1	0	4	0	0	0	1	0	0	0	0	1	1	1	0	0
TFAP2E	6	6	0	15	1	0	8	32	2	3	0	3	10	4	0	13	1	38	8	6	1	9	4	7	1	4	6	4	1	10	3	2	1	3	6	18	0	0	10	13	7	55	5	2	5	4	0	4	3
PSMB2	250	680	173	265	172	122	1925	231	72	326	581	146	1323	211	308	992	375	1401	1502	637	21	135	77	207	595	611	896	592	609	626	716	628	357	646	238	307	3	251	21	81	46	134	1281	229	235	142	366	294	245
C1orf216	3	15	5	2	3	8	12	19	0	0	0	2	14	11	0	20	10	16	28	186	8	26	32	46	236	185	491	279	134	234	291	182	85	144	109	54	2	16	6	7	4	16	22	104	85	61	38	153	43
CLSPN	16	90	0	35	88	121	337	137	33	515	329	326	67	2850	3	763	172	483	3203	40	3	31	18	5	23	5	17	78	22	58	26	28	7	37	55	11	32	9	60	120	61	288	50	40	30	10	98	9	7
AL354864.1	0	0	0	0	0	4	1	0	0	0	135	0	0	12	0	4	0	0	5	0	0	0	0	0	0	0	0	1	0	0	0	0	0	0	0	0	2	0	0	1	0	38	0	0	0	0	0	0	0
AGO4	110	723	193	155	438	103	1166	366	431	89	277	75	739	211	377	565	536	908	760	443	16	170	61	297	456	497	600	538	405	643	491	655	333	531	249	437	54	127	92	77	59	148	564	293	344	277	561	286	163
AGO1	318	1133	165	409	788	517	2292	724	300	185	1236	135	1088	256	237	1061	826	1808	1168	1468	20	274	236	565	1421	1172	1923	1164	1211	1093	1781	1403	1088	1363	530	1145	100	404	311	66	385	261	1142	692	757	608	1008	804	624
CFAP97P1	0	0	0	0	0	0	0	0	0	0	0	0	0	0	0	0	0	0	0	0	1	0	0	0	0	0	0	0	0	0	0	0	0	1	2	0	0	0	0	0	0	0	0	0	0	0	0	0	0
AL139286.2	0	0	0	0	0	0	0	0	0	0	0	0	0	0	0	0	0	0	0	0	1	0	0	0	0	0	0	0	0	1	0	0	0	0	2	0	0	0	0	0	0	0	0	0	0	0	0	0	2
AL139286.1	0	0	0	0	0	0	0	0	0	0	0	0	0	0	0	0	0	0	0	0	2	0	0	0	1	0	1	1	1	0	3	1	0	2	2	1	0	0	0	0	0	0	0	1	1	2	0	0	4
AGO3	436	1028	344	383	861	328	3251	578	441	172	845	142	1622	268	522	2082	914	2670	1693	1185	22	787	211	1187	1429	1017	2538	1170	697	1403	1549	1237	1029	1740	808	1610	85	380	185	76	419	301	1150	1163	1468	883	1270	1435	988
AL138787.2	0	0	0	0	0	0	1	0	0	41	0	0	0	0	40	2	6	5	5	0	0	0	0	0	0	0	0	0	0	0	0	0	0	0	0	0	2	0	0	2	0	9	1	0	0	0	2	0	0
AL138787.1	0	0	0	0	0	0	0	0	0	0	0	0	0	0	0	1	0	0	0	0	0	0	0	10	11	3	11	1	1	2	4	4	11	4	1	4	0	0	0	0	0	0	0	2	2	2	2	0	0
TEKT2	23	45	60	21	193	13	63	246	17	124	131	3	70	23	0	65	55	23	35	1	0	0	17	13	24	29	45	11	23	34	18	48	49	37	6	28	356	150	2393	323	587	165	833	7	3	1	12	4	5
ADPRS	15	48	41	2	28	15	77	61	14	4	29	13	55	10	1	45	36	78	61	193	4	47	31	55	181	170	185	140	438	156	246	279	186	158	40	132	15	27	61	24	85	21	201	29	51	32	38	66	17
COL8A2	1	27	0	0	41	0	34	66	0	25	0	1	6	6	0	23	11	9	21	69	0	24	9	38	69	422	34	141	555	56	130	271	243	210	29	37	3	2	9	26	1	18	23	2	3	3	6	24	19
TRAPPC3	91	375	100	158	358	94	454	644	124	220	89	68	357	144	66	454	327	408	398	456	6	79	112	133	724	493	1040	353	1357	588	748	810	802	732	180	236	43	86	117	35	90	95	329	184	177	127	179	320	144
MAP7D1	226	1177	289	354	537	121	512	683	227	258	412	73	748	311	349	523	891	549	708	1096	24	282	298	638	561	878	947	560	1084	701	790	821	342	621	308	489	149	391	1270	1507	573	149	856	38	79	87	63	171	73
RN7SL131P	0	0	0	0	0	0	0	0	0	0	0	0	0	1	0	0	0	0	0	0	0	0	0	1	0	0	0	0	0	0	0	0	0	0	0	0	0	0	0	0	0	0	0	0	1	0	0	0	0
THRAP3	1015	2541	624	951	1915	514	3561	1625	973	694	3098	398	2765	610	1145	3082	2014	2989	3536	2244	32	732	402	1038	2437	1784	3381	1552	3041	2266	2988	2860	2878	2873	1095	1376	540	827	1310	232	1368	504	2767	730	745	581	815	998	472
UBE2V2P4	0	0	0	0	0	0	0	0	0	0	0	0	0	0	0	0	0	0	0	0	0	0	0	0	0	0	0	0	0	0	0	0	0	0	0	0	0	0	0	0	0	0	0	0	0	0	0	0	0
SH3D21	119	537	3	214	167	160	212	547	248	106	33	37	130	541	0	388	491	222	228	71	10	33	110	156	103	129	97	291	114	78	44	323	303	99	41	144	77	24	280	117	151	113	58	12	31	33	126	46	49
EVA1B	1	5	0	9	10	10	5	5	2	5	0	1	5	22	0	16	3	5	6	133	3	8	92	37	48	157	35	62	150	91	76	120	42	23	14	21	1	0	2	0	7	0	4	0	0	0	2	6	1
AL591845.1	0	0	0	0	0	0	3	0	0	0	0	0	0	0	0	13	0	2	0	8	1	1	0	4	0	1	1	3	0	3	1	3	2	3	4	5	0	0	0	0	0	0	0	1	2	2	2	3	9
STK40	90	335	215	171	218	73	508	217	45	231	544	73	925	151	89	465	162	500	530	994	5	158	142	394	623	831	1454	1113	979	907	825	820	359	618	268	547	146	303	337	59	302	112	583	99	155	143	242	201	145
LSM10	43	77	0	81	8	16	135	61	0	21	30	8	149	21	51	186	58	123	135	88	4	26	18	11	70	95	163	110	169	61	125	138	59	72	30	63	5	61	26	8	42	12	261	10	16	8	20	33	17
RNU4-27P	0	0	0	0	0	0	0	0	0	0	0	0	0	0	0	0	0	0	0	0	0	0	0	0	0	0	0	0	0	0	0	0	0	0	0	1	0	0	0	0	0	0	0	0	0	0	0	0	0
OSCP1	74	128	97	98	97	19	162	138	1	34	194	6	137	14	66	190	68	156	80	119	1	3	28	88	252	119	483	63	285	127	281	180	156	181	24	124	21	128	102	52	67	63	357	116	44	49	27	96	22
SNORA63C	10	5	269	6	1	0	162	2	0	0	0	7	11	1	3	293	2	3	2	0	0	0	23	76	27	38	9	14	1	28	46	23	20	10	0	18	0	9	3	0	16	0	56	15	7	6	4	7	31
MRPS15	100	316	169	218	106	125	650	134	11	166	616	58	453	171	70	663	311	387	784	309	4	68	39	108	450	211	613	226	625	366	450	469	295	371	126	174	68	197	127	45	154	83	671	115	123	91	129	186	49
CSF3R	71	64	35	75	39	276	41	63	56	14	57	14	48	86	182	654	71	48	137	146	5	37	43	56	26	265	61	240	46	532	43	324	36	66	248	141	13	8	27	30	36	95	76	5	18	9	21	9	15
FTLP18	0	0	0	0	0	0	0	0	0	0	0	0	0	0	0	0	0	0	0	0	0	0	0	0	1	0	0	0	0	0	0	0	0	1	1	0	0	0	0	0	0	0	0	0	0	0	0	0	0
AL596257.1	0	0	0	0	0	0	0	0	0	0	0	0	0	0	0	0	0	0	0	0	1	0	0	0	0	0	0	0	0	0	0	0	0	1	4	0	0	0	0	0	0	0	0	0	0	1	0	0	1
AC117945.2	0	0	0	0	0	0	0	0	0	0	0	0	0	0	0	0	0	0	0	0	0	0	0	0	0	0	0	0	0	0	0	0	0	0	3	0	0	0	0	0	0	0	0	0	0	0	0	0	0
AC117945.1	0	0	0	0	0	0	0	0	0	0	0	0	0	0	0	0	0	0	0	0	1	0	0	0	0	0	0	0	1	0	0	0	0	0	0	0	0	0	0	0	0	0	0	0	0	0	0	0	0
GRIK3	8	702	0	6	630	144	153	2687	346	196	5	2	9	1	239	15	860	195	3	2	5	18	5	39	32	87	16	7	45	9	70	31	1	14	9	165	4	4	1	23	33	65	27	58	0	119	4	4	1
AL031430.1	0	0	0	0	0	0	0	0	0	0	0	0	0	0	0	0	0	0	0	0	1	0	0	0	0	0	0	0	0	1	0	0	0	1	5	0	0	0	0	0	0	0	0	0	0	0	0	0	0
AL353604.1	0	0	0	0	0	0	0	0	0	0	0	0	0	0	0	0	0	0	0	0	0	0	0	0	1	0	0	0	0	0	2	1	0	3	2	0	0	0	0	0	0	0	0	0	0	0	0	0	0
MIR4255	0	0	0	0	0	0	0	0	0	0	0	0	0	0	0	0	0	0	0	0	0	0	0	0	0	0	0	0	0	0	0	0	0	0	0	0	0	0	0	0	0	0	0	0	0	0	0	0	0
RNU6-636P	0	0	0	0	0	0	0	0	0	0	0	0	0	0	0	0	0	0	0	0	0	0	0	0	0	0	0	0	0	0	0	0	0	0	2	0	0	0	0	0	0	0	0	0	0	0	0	0	0
RNA5SP43	0	0	0	0	0	0	0	0	0	0	0	0	0	0	0	0	0	0	0	0	1	0	0	0	0	0	0	0	0	0	0	1	0	0	0	0	0	0	0	0	0	0	0	0	0	0	0	0	0
RPS29P6	0	0	0	0	0	0	0	0	0	0	0	0	0	0	0	0	0	0	0	0	0	0	0	0	0	0	0	0	0	0	0	0	0	0	0	0	0	0	0	0	0	1	0	0	0	0	0	0	0
LINC01137	0	0	0	0	0	1	1	0	0	0	0	0	0	0	0	2	0	0	2	72	0	8	9	22	37	58	94	30	34	54	97	16	24	41	10	23	0	0	0	0	0	1	0	8	14	7	3	24	5
ZC3H12A	59	105	11	84	58	17	57	96	0	49	1	23	91	104	1	46	100	54	86	396	2	87	50	64	27	549	135	116	66	492	57	84	32	164	84	26	82	27	220	19	42	34	28	5	5	14	3	17	12
MIR6732	0	0	0	0	0	0	0	0	0	0	0	0	0	0	0	0	0	0	0	0	0	0	0	0	0	0	0	0	0	0	0	0	0	0	0	0	0	0	0	0	0	0	0	0	0	0	0	0	0
MEAF6	536	660	567	488	541	144	4092	397	188	116	428	74	1130	147	476	1204	507	1959	609	904	16	137	165	337	1571	625	2444	477	518	1065	1486	619	493	1433	445	463	60	272	216	104	216	166	884	666	650	342	586	559	513
MIR5581	0	0	0	0	0	0	2	0	0	0	0	0	0	0	0	0	0	0	0	13	0	1	1	0	0	0	2	7	0	4	0	2	1	2	1	9	0	0	0	0	0	0	0	11	16	9	10	4	7
SNIP1	33	106	116	61	66	10	249	62	64	39	33	14	176	35	0	147	110	244	164	241	5	78	41	155	368	248	575	219	275	398	476	255	240	370	118	172	47	54	193	31	145	35	185	148	147	78	154	184	102
FTH1P1	0	0	0	1	0	0	0	0	0	0	0	0	0	0	0	2	0	0	0	0	1	0	0	0	0	0	0	0	1	1	1	0	0	0	0	0	0	0	1	0	1	15	0	0	0	0	0	0	0
AL034379.1	1	2	0	0	0	0	8	2	0	0	0	1	0	3	2	10	3	6	6	0	0	1	1	0	12	7	6	2	10	7	4	22	19	14	9	0	0	0	0	0	0	1	0	1	0	0	1	0	0
DNALI1	318	470	282	283	386	121	760	948	167	60	357	38	888	171	322	543	485	576	210	280	3	4	68	242	666	258	1306	333	298	368	543	281	436	782	107	409	1732	503	3668	1046	1109	221	1669	345	311	208	268	248	248
GNL2	512	1003	420	471	974	254	2179	1037	367	663	1662	308	1350	726	844	2647	847	1839	3880	505	9	159	102	227	631	356	982	355	551	914	626	413	398	632	404	222	435	432	753	146	795	291	1410	238	230	158	277	328	92
AL513220.1	0	0	0	0	0	0	0	0	0	0	0	0	0	0	0	0	0	0	0	0	0	0	0	0	1	0	0	1	0	0	0	0	0	0	1	1	0	0	0	0	0	0	0	0	0	0	0	0	0
RSPO1	1	52	0	0	0	0	7	25	0	0	0	0	0	2	0	2	40	0	4	0	1	16	0	0	1	3	0	0	0	0	0	2	0	0	8	0	0	1	7	1	0	23	3	0	0	0	0	0	1
C1orf109	11	35	0	14	39	22	95	22	4	16	49	8	50	15	30	52	27	80	100	110	2	25	15	32	225	121	239	156	220	218	240	252	234	157	55	95	0	23	3	5	13	5	62	93	50	41	74	87	43
CDCA8	2	70	0	104	89	3	216	104	25	81	52	53	24	106	12	334	26	248	1327	18	0	14	11	3	14	16	19	33	13	44	29	8	16	23	16	13	19	10	27	45	24	70	40	14	6	10	45	13	4
EPHA10	26	457	77	127	1203	58	142	1478	337	61	1	32	122	92	24	3	547	326	33	162	1	1	58	98	131	92	347	285	14	34	236	8	4	78	21	245	5	44	71	27	237	44	190	25	65	35	13	65	21
AC104336.1	0	0	0	1	0	0	0	0	0	0	0	0	0	0	0	0	0	0	0	0	0	0	0	0	0	0	0	0	0	0	0	0	0	0	0	2	0	0	0	0	0	0	0	0	0	0	0	0	0
ACTN4P2	0	0	0	0	0	0	0	1	0	0	0	0	0	0	0	0	0	0	0	0	0	0	0	0	0	0	0	0	0	0	0	0	0	0	0	0	0	0	0	0	0	0	0	0	0	0	0	0	2
AL929472.1	0	0	0	0	0	1	2	0	0	0	0	0	0	0	0	0	0	0	0	0	0	0	0	0	0	0	0	0	0	0	0	0	0	1	0	0	0	0	0	0	0	0	1	0	0	0	0	0	0
MANEAL	167	475	102	331	323	127	642	404	293	204	707	116	719	212	52	375	293	491	622	536	1	6	26	177	620	243	1031	313	117	403	868	47	41	259	38	296	15	410	60	19	76	93	1230	127	192	123	148	258	142
AL929472.3	0	1	3	0	0	0	2	1	0	0	0	0	5	3	0	8	12	0	8	0	0	0	0	0	0	0	0	1	0	0	0	1	2	1	1	2	1	1	0	11	1	20	0	0	0	1	0	0	0
YRDC	12	51	0	27	42	21	94	49	6	5	4	6	104	31	0	70	47	59	233	144	4	15	12	36	192	144	258	96	195	322	211	58	51	116	42	47	1	58	12	9	13	38	149	77	46	42	89	82	39
C1orf122	32	117	145	50	189	54	71	175	1	45	3	7	115	23	0	130	84	36	48	350	2	11	64	103	320	270	600	230	373	377	604	191	79	95	40	179	4	40	7	23	14	17	141	63	54	45	48	119	39
MTF1	173	450	488	307	275	112	631	216	188	18	342	43	559	65	23	367	312	475	459	371	4	127	60	201	343	490	426	376	343	346	483	440	274	364	209	306	13	152	40	75	117	114	440	141	188	113	202	190	155
AL929472.4	0	0	0	0	0	0	0	0	0	0	0	0	0	0	0	0	0	0	0	0	0	0	0	0	0	1	0	0	0	0	0	0	0	0	0	0	0	0	0	0	0	0	0	0	0	0	0	0	0
AL929472.2	0	0	0	0	0	0	1	0	0	0	0	0	0	0	0	0	0	0	0	2	0	0	1	0	2	3	2	1	0	0	0	0	0	0	0	0	0	0	0	0	0	0	0	0	1	0	1	0	0
INPP5B	319	921	509	226	1206	337	795	1407	558	406	295	38	1192	324	301	650	1167	542	837	421	11	150	214	324	265	384	507	262	284	416	329	468	292	357	123	653	199	291	290	44	428	221	530	220	275	158	310	287	103
AL929472.5	0	0	0	0	0	0	0	1	0	0	0	0	0	0	0	1	0	0	0	0	0	0	0	0	0	0	0	0	0	0	0	0	0	0	0	0	0	0	0	0	0	0	0	0	0	0	0	0	0
RNU6-584P	0	0	0	0	0	0	0	0	0	0	0	0	0	0	0	0	0	0	0	0	0	0	0	0	0	0	0	0	0	0	0	0	0	0	0	0	0	0	0	0	0	0	0	0	0	0	0	0	0
AL603790.1	0	0	0	0	1	0	0	0	0	0	0	1	0	0	0	0	1	0	0	0	0	0	1	1	0	0	0	0	0	0	0	0	0	0	0	1	0	0	0	0	0	0	0	0	0	0	0	0	0
SF3A3	524	1527	585	615	961	349	1701	1132	304	734	1776	382	1560	852	1169	2725	1394	1155	4562	779	13	210	229	223	904	559	1217	467	793	807	785	848	723	707	311	351	2143	678	3500	1552	2207	600	2799	432	305	207	479	450	163
RNU6-510P	0	0	0	0	0	0	0	0	0	0	0	0	0	0	0	0	0	0	0	0	0	0	0	0	0	0	0	0	0	0	0	0	0	0	1	0	0	0	0	0	0	0	0	0	0	0	0	0	0
FHL3	11	51	2	23	27	8	38	22	0	27	0	9	15	30	17	38	56	62	163	162	3	10	38	25	9	70	28	31	35	48	20	98	19	35	66	17	1	5	4	11	3	9	18	4	5	2	12	6	9
UTP11	105	403	81	183	95	239	496	140	103	34	687	83	403	177	456	748	273	217	1306	222	3	69	32	109	336	188	428	217	264	475	328	297	268	340	201	143	55	134	94	46	87	88	324	110	84	63	173	110	60
POU3F1	0	0	0	0	0	0	0	0	0	2	1	0	0	1	0	0	0	0	5	0	2	3	1	0	1	2	1	3	1	1	0	0	0	2	2	1	0	0	0	0	4	0	0	0	0	0	0	0	0
MIR3659HG	0	0	0	0	0	0	0	0	0	0	0	0	0	0	0	0	0	0	0	1	0	0	0	0	0	0	0	0	0	0	0	2	0	1	0	2	0	0	0	0	0	0	0	0	0	0	0	0	0
AL139158.1	0	0	0	0	0	0	0	0	0	0	0	0	0	0	0	0	0	0	0	0	0	0	0	0	0	0	0	0	0	0	0	0	0	0	0	0	0	0	0	0	0	0	0	0	0	0	0	0	0
MIR3659	0	0	0	0	0	0	0	0	0	0	0	0	0	0	0	0	0	0	0	0	0	0	0	0	0	0	0	0	0	0	0	0	0	0	0	1	0	0	0	0	0	0	0	0	0	0	0	0	0
LINC02786	0	0	0	0	0	0	0	0	0	0	0	0	0	0	0	0	0	0	0	0	0	1	0	0	0	0	0	0	0	0	0	0	0	0	1	0	0	0	0	0	0	0	0	0	0	0	0	0	0
AL390839.1	0	0	0	0	0	0	0	0	0	0	0	0	0	0	0	0	0	0	0	0	0	0	0	0	0	0	0	0	0	0	0	0	0	0	1	0	0	0	0	0	0	0	0	0	0	1	0	0	1
AL390839.2	0	0	0	0	0	0	0	0	0	0	0	0	0	0	0	0	0	0	0	0	0	0	0	0	0	1	0	0	0	0	0	0	0	0	0	0	0	0	0	0	0	0	0	0	0	0	0	0	0
LINC01343	0	0	0	0	0	0	0	0	0	0	0	0	0	0	0	0	0	0	0	0	1	0	0	0	0	0	0	0	1	0	0	0	0	1	7	0	2	0	0	5	0	39	0	0	0	0	0	0	0
AL513479.1	0	0	0	0	0	0	0	0	0	0	0	0	0	0	0	0	0	0	0	0	1	0	0	0	0	0	0	0	0	0	0	1	0	0	5	0	0	0	0	0	0	0	0	0	0	0	0	0	0
RNU6-753P	0	0	0	0	0	0	0	0	0	0	0	0	0	0	0	0	0	0	0	0	0	0	0	0	0	0	0	0	0	0	0	0	0	0	1	0	0	0	0	0	0	0	0	0	0	0	0	0	0
LINC01685	0	0	0	0	0	0	0	0	0	0	0	0	0	0	0	0	0	0	0	2	2	3	0	0	0	0	0	5	0	0	0	1	0	0	10	1	0	0	0	0	0	0	0	0	0	0	0	0	0
HSPA5P1	0	2	0	1	0	4	3	0	2	0	0	0	2	0	0	5	0	0	0	0	1	1	0	2	0	6	9	1	4	8	7	4	5	6	5	0	5	0	5	22	0	32	1	1	0	1	1	0	1
AL354702.1	0	0	0	0	0	0	0	0	0	0	0	0	0	0	0	0	0	0	0	0	0	0	0	0	0	0	0	0	0	0	0	0	0	1	4	0	0	0	0	0	0	0	0	0	1	0	0	0	0
RRAGC	1	10	2	4	23	0	6	7	0	14	0	1	7	3	0	26	17	8	13	98	1	30	9	42	170	174	245	142	160	207	204	218	110	100	72	42	6	3	1	5	2	9	19	72	74	45	64	76	68
AL139260.2	0	0	0	0	0	0	0	0	0	0	0	0	0	0	0	0	0	0	0	0	0	0	0	0	0	0	0	0	0	0	0	0	0	0	0	0	0	0	0	0	0	0	0	0	0	0	0	0	0
AL139260.1	23	15	0	7	0	18	63	19	0	32	37	0	32	7	0	48	11	81	9	8	1	4	5	9	6	10	10	12	26	8	12	6	7	5	3	34	11	14	16	22	5	50	20	9	10	6	8	7	8
MYCBP	0	0	0	0	0	0	12	0	0	0	0	0	0	0	0	1	0	2	0	50	3	19	9	31	254	73	296	48	167	174	125	178	201	165	53	9	0	5	0	0	0	0	0	81	58	30	69	74	59
AL139260.3	0	0	0	0	0	0	0	0	0	0	0	0	0	0	0	0	0	0	0	0	0	0	0	0	0	0	0	0	0	0	0	0	0	0	0	0	0	0	0	0	0	0	0	1	0	0	0	0	2
GJA9	0	0	0	0	0	0	0	0	0	0	0	0	0	0	0	0	0	0	0	0	0	0	0	0	0	0	0	0	0	0	1	0	0	0	0	0	0	0	0	0	0	1	0	0	0	0	0	0	0
RHBDL2	0	12	5	0	8	8	14	33	0	11	0	0	6	130	0	12	9	32	5	20	3	1	12	4	8	8	3	0	5	6	12	4	5	10	9	1	4	0	7	20	6	48	3	0	5	2	7	1	2
RNU6-605P	0	0	0	0	0	0	0	0	0	0	0	0	0	0	0	0	0	0	0	0	0	0	1	2	0	0	0	0	0	0	0	0	0	0	2	0	0	0	0	0	0	0	0	0	0	0	0	0	0
AL714019.1	0	0	0	0	0	0	0	0	0	0	0	0	0	0	0	0	0	0	0	0	0	0	0	0	0	0	0	0	0	0	0	0	0	0	0	0	0	0	0	0	0	0	0	0	0	0	0	0	0
EIF1P2	0	0	0	0	0	0	0	0	0	0	0	0	0	0	0	0	0	0	0	0	0	0	0	0	0	0	0	0	0	0	0	0	0	0	2	0	0	0	0	0	0	0	0	0	0	0	0	0	0
AKIRIN1	241	397	145	160	145	70	1741	124	218	241	238	68	740	68	261	881	264	1127	575	667	13	177	96	357	1248	754	2298	551	891	967	1358	750	553	1119	422	316	12	112	20	28	34	42	361	472	430	285	544	521	311
NDUFS5	291	900	128	289	197	107	1853	299	236	718	1268	188	1035	234	815	931	480	1009	1531	931	15	72	68	263	1162	364	1320	487	1148	1112	861	732	641	698	356	315	138	915	253	290	421	528	4439	255	260	150	352	525	81
MACF1	7471	44120	8660	7003	28111	6680	28811	26451	8605	13814	21798	1164	32876	5015	28301	17758	30577	23809	22091	26895	118	8232	4814	14157	13343	14314	22778	10773	13030	14214	18865	12950	10188	15310	10255	16055	3501	7660	9865	1511	10232	6209	31188	9664	9656	7108	13915	13850	3676
RNU6-608P	0	0	0	0	0	0	0	0	0	0	0	0	0	0	0	0	0	0	0	0	0	0	0	0	0	0	0	0	0	0	0	0	0	0	0	0	0	0	0	0	0	0	0	0	0	0	0	0	0
RNA5SP44	0	0	0	0	0	0	0	0	0	0	0	0	0	0	0	0	0	0	0	0	0	0	0	0	0	0	0	0	0	0	0	0	0	0	0	0	0	0	0	0	0	0	0	0	0	0	0	0	0
AL442071.2	0	0	0	0	0	0	0	0	0	0	0	0	0	0	0	0	0	0	0	0	0	0	0	0	0	0	0	1	0	0	0	1	0	0	2	2	0	0	0	0	0	0	0	0	0	0	0	0	0
AL442071.1	1	1	0	0	0	0	4	0	0	0	0	0	0	0	0	0	0	0	2	0	1	0	0	0	2	0	1	0	0	0	0	0	0	0	0	0	0	0	0	3	0	4	0	0	0	1	0	1	1
HSPE1P8	0	0	0	0	0	1	0	0	0	0	3	0	0	0	0	0	0	0	0	0	0	0	0	0	2	0	0	1	0	0	0	0	0	0	0	0	0	0	0	1	0	20	0	0	0	0	0	0	0
BMP8A	1	36	0	14	17	2	18	1	36	38	0	1	1	19	0	5	12	19	7	869	2	11	48	291	4503	872	197	75	14545	555	2785	3298	3980	1140	74	520	1	6	14	3	2	30	37	33	40	12	76	208	309
OXCT2P1	4	20	0	0	54	0	4	6	0	43	0	0	1	22	0	1	11	1	3	13	0	2	5	0	5	1	0	1	24	1	1	10	8	6	2	2	5	0	7	3	0	3	8	2	0	2	0	2	0
PPIEL	6	35	7	9	31	22	59	51	84	36	0	7	86	20	0	61	30	84	45	113	2	73	92	93	46	36	137	110	65	42	62	96	76	99	48	338	14	18	32	1	45	9	37	15	75	33	108	83	54
PABPC4	628	1386	1277	419	915	222	4143	897	190	3036	1770	556	1196	903	1150	3683	1819	2529	5299	1259	44	352	187	301	675	1075	1156	765	1081	1118	842	1285	863	856	801	460	351	356	384	184	229	308	1051	340	392	243	699	419	248
PABPC4-AS1	0	0	0	0	0	16	8	0	0	0	17	0	0	5	0	2	0	3	14	0	0	0	0	0	0	2	0	0	0	2	0	0	0	0	5	1	0	0	0	13	0	16	0	0	0	0	0	2	1
SNORA55	497	544	385	855	1139	64	955	453	117	209	286	99	246	222	2157	358	1448	313	302	27	0	2	34	15	7	20	5	5	26	29	16	7	11	7	8	46	93	178	418	19	516	58	307	8	8	2	11	12	9
HEYL	45	350	104	57	355	49	271	113	46	45	2	2	158	97	204	56	269	275	126	4533	15	7	489	188	110	469	347	120	284	268	254	200	68	471	439	459	217	10	275	64	101	52	156	33	80	36	221	64	89
AL035404.2	0	0	0	0	0	0	0	0	0	0	0	0	0	0	0	0	0	0	0	1	0	0	0	0	0	0	0	0	0	1	0	0	1	0	0	0	0	0	0	0	0	0	0	0	0	0	0	0	1
NT5C1A	0	2	0	0	0	0	12	2	0	12	0	0	1	1	0	0	3	1	0	2	0	2	2	1	0	3	2	0	5	8	0	4	0	0	2	1	6	0	1	6	12	19	5	0	0	0	0	0	0
HPCAL4	1	2	0	0	0	0	6	0	0	11	0	0	0	16	0	2	2	4	0	0	0	17	0	3	10	4	4	4	14	4	65	19	3	3	11	23	10	4	11	3	0	5	1	0	0	0	2	2	2
PPIE	109	348	106	118	285	14	743	294	188	411	32	40	378	173	198	388	321	562	567	299	8	118	86	159	533	271	710	270	654	341	611	576	520	406	113	279	108	286	323	102	538	139	880	204	221	104	248	219	128
AL035404.1	2	0	0	0	0	0	1	0	0	0	0	0	0	0	0	1	0	1	0	0	2	0	0	0	0	0	0	0	0	0	2	0	3	1	1	0	9	0	12	19	3	32	0	0	0	1	1	0	1
RNU7-121P	0	0	0	0	0	0	0	0	0	0	0	0	0	0	0	0	0	0	0	0	0	0	0	0	0	0	0	0	0	0	0	0	0	0	0	0	0	0	0	0	0	0	0	0	0	0	0	0	0
BMP8B	9	11	57	1	28	3	35	5	0	103	0	4	34	49	0	7	10	39	5	197	3	5	9	29	192	98	169	38	589	65	104	192	182	125	37	107	1	20	52	6	0	19	98	4	93	17	15	27	13
OXCT2	2	5	0	0	28	0	3	4	0	24	0	2	19	10	0	1	4	15	4	16	0	1	8	4	1	8	4	0	15	8	7	7	4	5	5	3	12	15	147	15	0	14	22	0	2	1	0	4	0
BMP8B-AS1	0	0	0	0	0	0	0	0	0	0	0	0	0	0	0	0	0	0	0	0	0	0	0	0	0	0	1	0	0	0	0	1	0	0	0	0	0	0	0	0	0	0	0	0	0	0	0	0	0
AL033527.3	0	0	0	0	0	0	0	0	0	0	0	0	0	0	0	0	0	0	0	0	0	0	1	1	2	2	0	1	7	2	1	3	5	1	0	0	0	0	0	0	0	0	0	0	0	0	0	1	0
AL033527.2	0	0	0	0	0	0	0	0	0	1	0	0	0	0	0	0	0	0	0	0	0	0	0	0	0	0	0	0	0	0	0	2	0	0	0	0	0	0	0	0	1	0	0	0	0	0	0	0	0
AL033527.4	0	0	0	0	0	0	4	0	0	0	0	0	1	0	0	1	1	2	0	0	0	5	1	2	2	3	1	2	5	5	1	3	5	0	5	1	0	0	0	0	0	0	0	0	5	0	2	2	1
LINC02811	0	0	0	0	0	0	1	0	0	1	0	0	0	1	0	0	0	1	0	0	0	0	0	1	2	0	1	2	0	0	0	0	0	0	0	0	0	0	0	0	0	0	0	0	0	0	2	0	0
TRIT1	124	289	36	162	190	82	1231	313	50	1489	348	155	409	244	51	884	226	1443	789	224	3	115	63	222	371	183	539	276	282	378	349	349	332	292	76	373	107	74	162	36	253	82	255	269	266	105	534	292	138
AL033527.1	0	0	0	0	0	0	0	0	0	1	0	0	0	0	0	1	0	3	0	4	0	2	0	6	1	1	1	2	0	4	0	1	1	4	2	4	0	0	0	0	0	0	0	5	9	5	26	5	12
MYCL	0	17	0	1	3	0	336	23	0	668	24	8	18	141	0	119	14	424	19	72	2	29	6	35	129	63	24	66	154	38	90	82	107	41	5	43	49	0	15	5	3	31	7	4	14	4	263	30	10
MYCL-AS1	0	0	0	0	0	0	1	0	0	0	0	0	0	3	0	0	2	0	0	0	0	0	0	0	0	0	1	0	0	0	0	0	0	0	0	0	3	0	0	6	0	13	0	0	0	0	4	0	1
AL663070.1	0	0	0	0	0	0	0	0	0	0	0	0	0	0	0	0	0	0	0	0	1	0	0	0	0	0	0	0	0	0	0	0	0	0	0	0	0	0	0	0	0	0	0	0	0	0	0	0	0
MFSD2A	24	109	0	31	161	45	106	19	1	103	118	12	16	78	218	58	125	112	266	345	1	14	65	213	201	89	613	141	160	249	279	61	13	245	45	333	2	9	0	43	2	59	18	46	158	72	44	168	44
AL663070.2	1	5	0	0	13	0	3	5	1	30	0	2	2	8	0	5	0	6	9	11	0	2	12	6	0	0	5	8	3	3	1	1	0	8	1	15	2	0	0	4	0	4	2	1	4	1	7	3	1
CAP1	352	2136	251	604	712	645	3021	680	191	1827	898	909	1813	391	1281	2208	1343	2504	2213	2845	44	789	205	508	2643	1875	2961	1482	2577	2704	2634	2427	1839	2120	1474	632	55	624	146	246	257	446	2868	771	778	511	1323	1183	460
PPT1	330	872	1054	208	328	357	1588	494	267	2095	1005	147	1281	361	623	1618	545	1189	1746	1401	14	199	82	472	1747	1218	3482	994	1613	1017	2379	1380	987	1616	630	374	17	1209	44	284	185	367	2329	632	507	499	353	674	448
OAZ1P1	0	0	0	0	0	0	0	0	0	0	0	0	0	0	0	0	0	0	0	0	0	0	0	0	1	2	1	0	0	1	0	0	0	0	0	0	7	0	0	0	0	7	0	0	0	0	0	0	0
RLF	527	1032	399	377	589	309	2806	566	123	864	1701	131	1462	165	1346	1663	1122	1651	1520	437	7	319	37	381	728	663	840	458	544	1029	619	821	802	959	476	266	117	202	127	135	223	284	568	364	266	174	439	286	171
RNU6-1237P	0	0	0	0	0	0	1	0	0	0	0	0	0	0	0	0	0	0	0	0	0	2	0	3	0	0	1	3	0	3	0	0	0	2	2	0	0	0	0	0	0	0	0	1	3	0	1	2	0
TMCO2	0	1	0	0	0	0	4	0	0	0	0	5	2	0	0	3	0	1	0	0	1	0	0	0	1	0	0	0	0	0	0	0	0	0	6	0	0	0	0	10	1	55	0	1	0	0	0	0	1
AL050341.2	0	0	0	0	0	0	2	0	0	0	0	0	0	0	0	0	0	2	0	69	2	25	11	62	180	49	239	70	166	116	226	164	127	166	17	50	0	0	0	0	0	0	0	70	40	31	47	65	17
ZMPSTE24	226	731	316	228	154	133	2034	215	47	888	758	110	582	191	415	1331	414	838	748	400	8	141	49	193	1159	601	1752	702	580	1035	1179	1049	937	1234	372	161	15	190	27	116	53	171	637	396	403	218	401	484	263
AL050341.1	0	0	0	0	0	0	0	0	0	0	0	0	0	0	0	0	0	0	0	0	0	0	0	0	0	0	0	0	0	0	0	0	0	0	1	0	0	0	0	0	0	5	0	0	0	0	0	0	0
COL9A2	150	64	37	0	59	1	58	18	13	429	92	585	12	175	117	73	65	17	91	16	4	101	37	113	97	99	86	25	119	24	405	124	183	82	23	160	38	173	305	118	69	178	36	3	0	25	0	5	7
AL031985.2	5	5	1	0	4	1	10	0	0	0	52	1	2	0	1	10	11	3	3	0	1	0	0	0	5	1	2	0	2	1	2	2	0	1	0	0	2	0	0	29	3	25	1	2	0	0	0	1	2
SMAP2	363	1046	189	503	804	604	1422	688	664	765	634	78	1405	129	326	274	1292	1274	1321	506	16	1176	231	235	362	638	795	678	379	913	477	534	252	475	597	274	225	359	190	110	416	158	1234	197	205	112	246	208	133
AL031985.1	0	0	0	0	0	0	0	0	0	0	0	0	0	0	0	0	0	0	0	0	0	3	0	0	0	0	0	0	0	0	0	0	0	1	1	0	0	0	0	0	0	0	0	0	1	0	0	1	0
AL031985.4	0	0	0	0	0	0	0	0	0	0	0	0	0	0	0	0	0	0	0	0	0	0	0	0	1	0	0	1	0	0	0	0	0	0	0	0	0	0	0	0	0	0	0	0	0	0	0	0	0
ZFP69B	65	71	0	48	69	0	936	42	209	555	14	53	152	31	18	575	31	388	339	42	2	31	23	19	67	43	52	71	20	53	51	35	24	78	29	36	12	15	27	28	45	109	2	9	38	35	52	13	6
AL031985.3	0	0	0	0	0	0	12	0	0	0	0	1	2	0	0	2	0	3	0	18	0	15	5	12	43	23	40	37	5	17	27	21	15	33	15	9	0	0	0	0	0	0	0	6	15	9	21	12	9
AL603839.4	0	0	0	0	0	0	1	0	0	0	0	0	0	0	0	0	0	0	0	0	0	0	0	1	0	0	1	2	0	1	0	0	0	0	2	0	0	0	0	0	0	0	0	0	0	0	1	0	4
ZFP69	24	148	28	26	53	30	540	34	1	169	131	20	111	19	30	422	68	284	155	36	1	40	9	19	56	42	65	70	50	40	61	91	62	36	29	35	8	35	22	37	25	158	8	19	35	22	44	25	19
AL603839.3	0	1	0	0	0	0	1	2	0	1	0	0	0	0	0	1	0	0	0	2	3	9	0	5	5	4	11	12	2	2	3	4	4	6	7	7	0	0	0	0	0	0	0	11	8	7	8	11	6
EXO5	33	125	139	32	185	33	354	92	2	257	460	16	115	30	0	146	105	276	109	53	1	36	15	42	117	49	107	99	84	89	75	95	92	60	34	66	2	9	7	15	30	79	16	39	30	29	59	40	20
AL603839.1	0	0	0	0	0	0	4	0	0	0	0	0	0	0	0	0	0	1	0	0	0	0	0	0	0	0	0	0	0	0	0	0	0	0	0	0	0	0	0	4	0	17	0	0	0	0	0	0	0
AL603839.2	0	0	0	0	0	0	0	0	0	0	0	0	0	0	0	0	0	0	0	0	0	0	0	2	0	0	0	0	0	0	0	0	0	0	1	0	0	0	0	0	0	0	0	0	0	0	3	0	1
ZNF684	57	43	72	64	74	23	202	35	0	40	0	5	82	4	140	107	42	140	97	44	6	29	5	28	102	36	80	51	61	64	83	130	126	110	33	44	74	24	67	10	57	46	25	33	30	26	51	42	25
AL356379.2	0	0	0	0	0	0	0	0	0	0	0	0	0	0	0	0	0	0	0	0	0	0	0	0	0	0	0	0	0	0	0	1	0	0	2	0	0	0	0	0	0	0	0	0	0	0	0	0	0
AL356379.1	0	0	0	0	0	0	0	0	0	0	0	0	0	0	0	0	0	0	0	0	0	0	0	0	0	0	0	0	0	1	0	0	0	0	3	1	0	0	0	0	0	0	0	2	0	0	0	1	0
GTF2F2P2	0	0	0	0	0	0	0	0	0	0	0	0	0	0	0	0	0	0	0	0	0	0	0	0	0	0	0	0	0	0	0	0	1	0	0	0	0	0	0	0	0	0	0	0	0	0	1	0	0
RIMS3	0	28	0	1	17	5	13	5	1	155	0	0	10	15	0	24	17	9	54	57	1	19	17	56	87	168	41	60	79	17	80	171	120	41	26	17	11	2	4	4	4	39	9	12	6	28	5	14	7
AL031289.2	0	0	0	0	0	0	0	0	0	0	0	0	0	0	0	0	0	0	0	0	1	0	0	0	0	0	0	0	0	0	0	0	1	0	0	0	0	0	0	0	0	0	0	0	0	0	0	0	0
AL031289.1	0	0	0	0	0	0	0	0	0	2	0	0	0	2	0	0	0	0	0	2	0	2	1	0	0	1	0	1	1	0	3	1	1	0	3	1	0	0	0	0	0	0	0	0	0	0	2	1	1
NFYC-AS1	0	1	0	2	4	0	0	8	0	3	0	0	1	5	0	1	2	1	2	20	2	18	8	58	85	20	44	27	33	27	40	32	32	32	13	41	0	6	1	0	1	0	1	40	19	27	42	31	26
NFYC	216	608	289	365	279	88	965	314	167	769	490	90	967	136	356	1267	518	641	857	410	9	159	85	204	415	343	505	312	683	308	462	619	460	444	122	318	215	212	306	65	232	125	543	157	182	115	232	187	154
MIR30E	11	13	0	0	29	0	5	16	0	0	0	0	3	6	0	9	4	4	4	2	0	2	0	0	0	0	1	1	2	0	0	0	0	0	0	4	0	0	1	0	0	12	0	1	4	0	3	1	0
MIR30C1	0	0	0	0	0	0	1	0	0	0	0	0	0	0	0	0	0	0	0	1	0	0	1	0	0	0	0	0	0	0	0	1	0	0	0	1	0	0	0	0	0	0	0	0	1	1	0	2	0
KCNQ4	2	59	0	7	1	7	18	17	3	69	0	7	4	13	38	29	32	15	71	8	1	5	4	1	3	24	2	7	2	3	2	11	2	6	6	4	16	3	27	15	1	73	2	0	1	0	0	0	3
RN7SL326P	0	0	0	0	0	0	0	0	0	0	0	0	0	0	0	0	0	0	0	0	1	1	2	4	2	6	4	3	1	9	4	3	1	0	0	5	0	0	0	0	0	0	0	0	1	0	0	1	1
CITED4	0	1	0	4	0	0	0	0	0	2	0	0	0	2	0	1	1	0	1	25	0	9	12	9	31	41	14	23	48	12	31	49	47	31	12	10	0	0	0	0	0	0	0	3	0	0	0	0	1
AC119677.1	0	0	0	0	0	0	0	0	0	0	0	0	0	0	0	0	0	0	0	0	0	1	0	0	0	0	0	0	0	0	0	1	0	0	1	0	0	0	0	0	0	0	0	0	0	0	0	0	0
AL391730.1	0	0	0	0	0	0	0	0	0	0	0	0	0	0	0	0	0	0	0	0	0	0	0	0	0	0	0	0	0	0	0	0	1	0	3	0	0	0	0	0	0	2	0	0	0	0	0	0	0
AL391730.2	0	0	0	0	0	0	0	1	0	0	6	0	0	0	0	0	0	0	0	0	0	1	0	0	0	0	0	0	0	0	0	0	0	0	4	0	0	0	0	1	0	0	0	0	0	0	0	0	1
UBE2V1P8	0	0	0	0	0	0	0	0	0	0	0	0	0	0	0	0	0	0	0	0	0	0	0	0	0	0	0	0	0	0	0	0	0	0	0	0	0	0	0	0	0	0	0	0	0	0	0	0	0
CTPS1	172	768	29	161	280	103	520	288	175	2676	1165	228	338	617	75	894	391	446	3028	230	4	131	112	113	141	176	281	252	276	260	134	192	84	180	235	208	236	63	470	58	477	179	350	167	184	89	305	185	75
SLFNL1-AS1	8	9	1	5	8	15	4	7	0	44	0	1	4	5	0	14	21	1	21	18	0	24	14	18	2	11	13	35	2	17	2	11	2	11	11	50	0	0	0	1	2	6	0	10	11	7	20	14	11
SLFNL1	0	2	0	0	14	0	1	10	16	0	0	3	5	2	0	6	8	0	1	4	0	2	5	14	9	5	15	10	5	8	3	17	14	6	5	29	3	1	0	1	1	2	1	14	10	9	10	6	2
SCMH1	1185	2054	368	856	1193	402	1835	1429	303	1467	823	180	3374	348	788	1167	1853	893	1168	492	1	151	152	346	493	401	673	402	829	442	555	800	507	544	209	498	150	425	535	218	609	336	1281	253	203	139	366	274	141
RPL23AP17	0	0	0	0	0	0	0	0	0	20	0	0	0	0	0	1	0	0	0	0	0	0	0	0	0	0	0	0	0	0	0	0	0	0	0	0	0	0	0	0	0	0	0	0	0	0	0	0	0
AC093151.7	0	0	0	0	0	0	0	0	0	0	0	0	0	0	0	0	0	0	0	0	0	0	0	1	0	2	1	0	5	1	6	1	1	6	9	8	0	0	0	0	0	0	0	0	0	0	2	0	1
AC093151.2	0	0	0	0	0	0	3	1	0	4	0	0	0	1	0	4	0	0	0	11	0	1	4	3	0	7	1	2	7	3	2	2	3	8	4	26	0	0	0	0	0	0	0	1	3	3	2	0	3
AC093151.1	0	0	0	0	0	0	0	0	0	0	0	0	0	0	0	0	0	0	0	0	0	0	0	0	0	0	0	0	0	0	0	0	0	1	0	0	1	0	0	0	0	6	0	0	0	0	0	0	0
AC093151.5	0	0	0	0	0	0	0	0	0	0	0	0	0	0	0	0	0	0	0	0	0	0	0	0	0	1	2	1	1	0	2	1	0	0	1	0	0	0	0	0	0	3	0	0	0	0	3	0	1
FOXO6	12	14	0	27	71	18	77	65	40	131	3	4	86	30	6	79	17	48	55	4	0	2	3	38	23	35	34	25	27	41	65	12	12	30	6	72	14	1	21	6	53	5	51	3	1	0	3	0	5
FOXO6-AS1	0	0	0	0	0	0	0	0	0	0	0	0	0	0	0	0	0	1	0	2	1	0	0	5	1	3	1	2	12	0	2	4	4	1	0	20	0	0	0	0	0	0	0	3	0	0	4	0	6
RNA5SP45	0	0	0	0	0	0	0	0	0	0	0	0	0	0	0	0	0	0	0	0	0	0	0	0	0	0	0	0	0	0	0	0	0	0	0	0	0	0	0	0	0	0	0	0	0	0	0	0	0
EDN2	0	7	0	0	0	0	11	7	0	1	0	0	1	10	0	31	13	14	3	2	0	0	0	1	6	8	13	4	9	7	37	2	3	4	9	4	8	1	12	5	0	28	5	2	0	0	5	4	0
HIVEP3	116	395	77	233	549	211	435	547	108	275	314	32	897	127	68	121	517	526	503	384	8	163	184	439	315	305	250	612	521	338	320	510	315	428	196	664	134	92	405	73	207	172	223	127	234	73	276	161	143
AL445933.2	0	0	0	0	0	0	0	0	0	0	0	0	0	0	0	0	0	0	0	0	0	0	0	0	0	0	0	0	0	0	0	0	0	1	0	0	0	0	0	0	0	0	0	0	0	0	0	0	0
AL445933.1	0	0	0	0	0	0	0	0	0	0	0	0	0	0	0	0	0	0	0	0	3	0	0	0	0	0	0	0	0	0	1	1	0	0	6	0	0	0	0	0	0	0	0	0	0	0	0	0	0
AC119676.1	0	0	0	0	0	0	0	0	0	0	0	0	0	0	0	0	0	0	0	0	0	0	0	0	0	0	0	0	0	0	0	0	0	0	0	0	0	0	0	0	0	0	0	0	0	0	0	0	0
AL158216.1	0	0	0	0	0	0	0	0	0	0	0	0	0	0	0	0	0	0	0	0	0	0	0	0	1	3	3	1	4	0	1	0	0	2	1	1	0	0	0	0	0	0	0	0	0	0	0	0	1
HNRNPFP1	2	0	0	0	0	0	0	0	0	0	0	0	0	0	0	0	0	0	0	0	0	0	0	0	0	0	0	1	0	0	0	0	0	1	0	0	0	0	0	0	0	0	0	0	0	0	0	0	0
AC114492.1	0	0	0	0	0	0	0	0	0	0	0	0	0	0	0	0	0	0	0	0	0	0	0	0	0	0	0	0	0	0	0	0	1	0	0	0	0	0	0	0	0	0	0	0	0	0	0	0	0
GUCA2B	0	8	0	0	0	0	0	7	0	13	0	0	0	0	0	0	14	0	0	0	0	0	0	0	1	0	0	0	0	0	0	0	0	0	0	0	0	0	0	0	0	13	2	0	0	0	0	0	0
GUCA2A	0	72	0	0	0	0	2	21	0	0	0	0	0	18	0	0	209	0	0	0	0	0	0	0	0	0	0	0	0	1	0	0	0	0	0	0	0	0	0	1	0	14	7	0	0	0	0	0	0
FOXJ3	659	1166	168	593	524	198	2128	400	445	1297	1005	137	1829	177	425	1173	1175	1545	1337	1241	12	337	167	797	1552	1125	2249	977	817	1460	1890	1197	921	1392	471	1160	98	223	326	73	456	235	987	656	767	501	978	663	640
AC096540.1	0	0	0	0	0	0	0	0	0	0	0	0	0	0	0	0	0	0	0	0	0	0	0	0	0	0	0	0	0	1	1	0	0	0	0	1	0	0	0	0	0	0	0	0	0	1	0	0	2
RIMKLA	6	77	33	33	82	1	135	244	47	700	26	11	105	127	108	11	64	112	126	520	9	1	32	154	525	164	916	276	69	556	680	40	69	414	116	445	6	21	30	18	71	87	114	307	517	284	849	396	203
AL513331.1	0	0	0	0	0	0	1	0	0	0	0	0	0	0	0	4	0	1	0	2	0	0	0	1	0	0	0	0	1	0	0	1	0	1	0	0	0	0	0	0	0	1	1	0	2	0	0	0	1
ZMYND12	5	26	105	34	9	4	92	0	0	0	109	3	41	1	0	159	44	51	7	20	0	0	9	31	106	32	108	11	95	54	140	66	62	36	17	53	4	14	3	9	7	36	53	32	21	19	34	35	9
PPCS	89	426	97	155	146	254	770	283	215	300	1676	57	355	66	534	1471	335	311	221	276	6	101	40	88	847	260	641	314	689	490	658	750	807	628	185	130	12	89	6	38	25	85	348	187	142	61	225	210	140
CCDC30	219	275	293	136	425	130	261	603	79	39	337	38	219	47	83	508	330	156	99	284	13	68	207	623	523	186	709	237	381	334	398	355	464	522	127	951	361	87	954	109	474	237	121	706	414	245	264	600	266
RPS3AP11	0	0	0	0	0	0	0	0	0	0	0	0	0	0	0	1	0	0	0	2	0	1	2	8	3	1	2	3	1	9	3	0	2	1	2	20	0	0	2	0	2	0	0	5	6	5	0	7	1
TMSB4XP1	2	4	0	0	0	0	4	2	1	6	2	0	5	2	0	14	2	5	6	0	0	0	0	0	2	0	0	0	0	1	0	2	0	0	2	0	1	1	2	2	1	7	1	0	0	0	0	0	0
RNU6-536P	0	0	0	0	0	0	1	0	0	0	0	0	0	0	0	0	0	0	0	0	0	1	0	3	0	0	0	0	0	0	1	0	1	0	0	1	0	0	0	0	0	0	0	1	2	0	2	1	1
AL445669.1	0	0	0	0	0	0	0	0	0	0	0	0	0	0	0	1	0	0	0	1	0	0	0	4	0	0	0	1	0	1	1	1	0	2	3	5	0	0	0	0	0	0	0	6	3	4	1	3	4
PPIH	36	147	44	75	78	93	240	154	0	777	384	48	204	134	7	454	198	157	666	96	0	75	37	47	174	87	224	97	233	154	156	181	176	162	37	67	25	95	69	23	138	85	303	55	60	38	102	60	18
AC098484.4	0	3	0	0	15	0	4	0	0	0	0	1	3	8	0	3	4	8	4	9	0	8	1	19	10	4	18	9	12	9	16	14	22	13	1	30	3	3	0	20	0	14	2	17	15	11	4	14	6
AC098484.2	0	0	0	0	0	0	0	0	0	0	0	0	0	0	0	0	0	0	0	0	0	3	0	2	3	1	3	3	2	2	2	2	2	3	1	3	0	0	0	0	0	0	0	1	1	1	5	0	0
YBX1	1251	3581	324	1177	644	901	4972	697	300	8219	6419	2021	3487	2168	2656	12433	3049	2040	15411	2067	27	214	116	183	1084	546	1074	721	1537	1026	595	1502	1155	1022	507	129	238	855	732	817	1010	661	5060	558	492	306	1140	798	395
CLDN19	0	1	0	0	0	0	0	0	0	0	0	0	0	0	0	5	0	0	3	0	0	0	0	0	0	0	0	0	0	3	0	5	0	0	4	0	0	0	0	3	1	17	0	0	0	0	0	0	0
P3H1	92	424	185	199	448	51	303	596	147	523	689	147	671	252	172	637	430	365	888	439	4	133	182	184	234	308	765	307	202	790	357	264	141	283	138	302	249	538	813	123	1178	254	581	95	128	102	133	201	33
C1orf50	0	0	2	1	0	0	11	0	2	7	1	0	1	1	0	10	2	4	2	101	3	27	14	74	111	48	212	87	70	103	123	99	89	94	36	81	0	0	0	1	0	1	1	76	81	82	109	68	75
AC098484.3	0	0	0	0	0	0	0	1	0	0	0	0	0	0	0	0	0	0	0	0	0	0	1	0	0	0	0	1	0	0	0	0	0	0	0	0	0	0	0	0	0	0	0	0	0	0	0	0	0
AC098484.1	0	0	0	0	0	0	0	0	0	0	0	0	0	0	0	0	0	0	0	0	0	0	0	0	0	0	0	0	1	0	0	0	0	0	1	0	0	0	0	0	0	0	0	0	0	0	0	0	0
TMEM269	1	2	0	0	0	4	3	6	0	20	0	0	7	0	0	6	0	2	0	2	1	2	0	4	2	1	1	2	0	9	3	3	1	3	7	1	0	0	1	10	1	16	2	4	0	5	5	0	4
SVBP	23	73	55	52	6	10	72	23	25	115	28	5	105	15	20	165	43	25	125	133	3	17	29	38	204	80	209	101	173	176	139	169	98	120	35	46	10	16	74	18	24	29	89	67	41	17	44	62	19
ERMAP	122	434	221	348	474	196	287	645	69	129	68	22	487	76	155	175	348	181	67	350	2	42	59	170	543	249	608	156	580	330	653	315	355	313	81	284	60	193	184	49	185	161	459	137	162	136	140	206	135
AL512353.1	0	4	0	0	1	10	2	0	0	0	0	2	1	0	0	14	0	4	8	4	0	3	0	4	32	15	16	9	71	7	10	23	19	14	6	6	2	0	0	4	2	17	0	3	1	0	1	4	2
ZNF691	52	147	0	84	97	73	113	171	71	27	213	10	166	9	0	224	139	94	205	55	1	45	29	53	157	50	124	64	229	56	118	170	123	59	16	91	8	46	25	25	32	75	115	40	39	35	42	49	26
AL512353.2	0	0	0	0	0	0	0	0	0	8	0	0	0	0	0	0	2	0	0	0	1	0	0	0	0	0	0	0	1	0	0	0	0	1	1	0	0	0	0	0	0	0	0	0	0	0	0	0	0
AL512353.3	0	0	0	0	1	0	0	0	0	0	0	0	0	0	16	0	0	1	0	0	0	0	0	0	0	0	0	0	0	0	0	0	0	0	1	0	4	0	0	11	2	45	0	0	0	0	0	0	0
ATP6V1E1P1	0	2	0	0	0	0	2	1	0	1	3	0	2	7	0	1	1	1	1	0	0	0	0	1	4	1	2	1	3	2	1	1	3	2	1	1	3	0	0	4	0	15	0	0	0	0	0	0	0
SLC2A1	31	128	51	217	101	21	164	239	58	1127	77	84	176	368	74	703	92	141	613	215	1	92	18	123	311	224	513	170	375	258	496	254	172	170	127	164	37	59	58	97	28	148	151	68	62	50	220	125	27
ATP6V0CP4	0	0	0	0	0	0	0	0	0	5	0	0	4	0	0	1	0	1	3	2	0	1	1	2	1	4	1	0	0	2	1	0	2	0	0	5	0	0	0	0	0	0	0	0	0	1	1	0	0
SLC2A1-AS1	0	0	1	0	2	0	4	5	21	3	1	4	0	6	1	27	2	0	1	15	3	8	12	49	27	14	46	24	13	23	25	10	9	25	9	58	0	0	0	0	0	0	0	17	13	7	49	19	32
AC099795.1	0	0	0	0	0	0	0	0	0	0	0	0	0	0	0	0	0	0	0	0	0	0	0	0	0	0	1	0	0	0	1	0	0	0	4	0	0	0	0	0	0	0	0	0	0	0	0	1	0
RNU6-880P	0	1	0	0	0	0	0	0	0	0	0	0	0	0	0	0	0	0	0	0	0	0	0	0	0	0	1	0	0	0	0	0	0	0	0	0	0	0	0	0	0	0	0	1	1	0	2	2	1
AL161637.2	0	0	0	0	0	0	0	0	0	0	0	0	0	0	0	0	0	0	0	0	0	0	0	0	0	0	0	0	0	0	0	0	0	0	0	0	0	0	0	0	0	0	0	0	0	0	0	0	0
AL161637.1	0	0	0	0	0	0	0	0	0	0	0	0	0	0	0	0	0	0	0	0	0	1	0	0	0	0	0	0	0	0	0	0	0	0	1	0	0	0	0	0	0	0	0	0	0	0	0	0	0
FAM183A	17	11	23	0	5	0	9	4	0	33	0	1	85	4	0	18	14	1	31	0	1	1	12	18	1	3	21	15	0	17	16	0	0	12	14	27	7	1	12	65	5	28	31	6	0	1	25	15	8
EBNA1BP2	186	412	273	297	295	109	385	411	184	235	266	121	597	171	51	1190	366	192	1351	389	5	49	85	144	694	327	1084	307	732	655	708	504	557	559	231	222	185	204	316	65	356	237	989	192	146	123	121	229	73
MIR6733	0	0	0	0	0	0	0	0	0	0	0	0	0	0	0	0	0	0	0	0	0	0	0	0	0	0	0	0	0	0	0	0	0	0	0	0	0	0	0	0	0	0	0	0	0	0	0	0	0
CFAP57	33	5	30	0	10	0	12	18	0	8	20	0	7	5	0	122	0	4	14	3	6	5	5	26	49	12	63	12	37	8	39	43	34	27	22	18	46	5	37	126	4	247	34	36	0	10	3	11	5
RNA5SP46	0	0	0	0	0	0	0	0	0	0	0	0	0	0	0	0	0	0	0	0	0	0	0	0	0	0	0	0	0	0	0	0	0	0	1	0	0	0	0	0	0	0	0	0	0	0	1	0	0
TMEM125	2	10	55	0	0	14	32	38	33	0	4	0	11	22	0	10	37	7	0	252	1	0	33	92	334	186	435	60	774	217	458	182	281	145	12	125	0	14	0	0	0	7	42	60	47	25	23	133	27
C1orf210	39	54	13	24	30	40	27	119	95	0	0	2	86	7	0	18	35	8	3	89	1	1	8	55	135	83	172	22	422	98	187	82	113	84	5	78	0	40	5	3	8	6	110	15	28	15	15	35	13
TIE1	51	254	0	56	143	63	112	214	112	21	76	17	156	25	45	74	189	85	114	721	2	31	193	112	137	1029	197	651	399	425	181	1253	234	173	210	85	16	45	221	19	151	113	227	9	13	14	14	63	33
MPL	31	41	39	78	42	7	32	65	26	0	15	2	30	22	0	22	15	14	3	17	0	0	4	6	11	9	7	10	5	10	11	18	9	12	9	14	21	31	4	33	8	220	64	4	5	2	1	0	4
AL139289.2	0	0	0	0	0	0	0	0	0	0	0	0	0	0	0	0	0	0	0	0	0	1	1	1	2	0	0	0	1	0	2	1	4	0	2	2	0	0	0	0	0	0	0	0	0	0	0	1	2
AL139289.1	0	1	0	0	0	0	0	0	0	2	0	0	0	0	0	2	0	1	0	8	0	0	1	3	14	7	12	8	27	8	38	7	8	4	0	14	0	0	0	0	0	0	0	8	3	3	2	6	1
CDC20	2	42	0	0	7	42	26	33	1	758	93	121	20	157	0	374	40	37	750	16	0	16	2	3	27	11	9	22	54	34	46	13	6	9	4	2	0	3	1	10	1	47	31	2	3	1	21	4	1
ELOVL1	151	367	198	211	200	120	495	290	116	125	79	50	468	132	15	653	320	401	284	522	2	55	45	113	663	329	387	231	1020	345	584	447	330	260	105	145	7	147	15	34	83	111	646	83	74	60	59	124	56
MIR6734	0	0	0	0	0	0	0	0	0	0	0	0	0	0	0	0	0	0	0	0	0	0	0	0	0	0	0	0	0	0	0	0	0	0	0	0	0	0	0	0	0	0	0	0	0	0	0	0	0
MED8	68	229	111	96	277	20	195	174	47	112	304	58	298	66	33	407	191	154	289	354	7	52	90	87	410	249	583	213	532	512	493	360	306	324	129	194	62	169	208	67	437	89	389	149	141	95	122	202	70
MED8-AS1	0	0	0	0	0	0	2	0	1	0	0	0	0	0	0	1	11	1	0	0	1	1	0	0	0	0	0	0	0	1	0	0	0	0	0	1	0	0	0	2	0	22	0	0	0	0	0	1	0
SZT2	560	2839	1215	737	2647	789	2277	3497	1626	1235	903	339	3941	744	535	2500	3126	2121	2118	1423	20	856	769	1350	687	877	1456	1442	1231	1005	985	1147	808	904	277	2494	322	1200	1467	169	1740	675	1940	458	680	438	643	645	378
SZT2-AS1	2	12	0	7	45	15	17	55	17	0	0	0	17	11	0	16	3	12	9	0	1	2	3	3	1	4	3	2	0	2	3	2	4	0	2	6	0	2	4	8	16	20	2	1	2	2	0	0	1
MIR6735	0	0	0	0	0	0	0	0	0	0	0	0	0	0	0	1	0	0	0	0	0	0	3	0	0	0	0	0	0	1	0	1	0	0	0	0	0	0	0	0	0	0	0	0	0	0	1	0	0
HYI	43	334	0	113	1107	61	193	695	196	152	201	35	494	77	99	483	398	190	196	258	1	53	203	139	355	229	392	225	371	136	356	364	281	236	47	299	211	117	530	38	281	89	424	57	49	53	7	58	21
HYI-AS1	0	0	0	0	0	0	0	0	0	0	0	0	0	0	0	0	0	0	0	0	0	1	0	21	5	1	3	0	1	1	2	1	2	2	0	9	0	0	0	0	0	0	0	4	4	4	3	2	2
PTPRF	998	3913	789	1589	3931	817	2063	4631	2501	1262	1970	926	4923	1055	917	9436	3676	934	1643	4189	16	106	851	1893	3015	3167	4642	2755	2085	1617	5206	3340	1817	3112	184	3175	367	1608	2154	172	1126	713	9212	613	457	594	906	694	321
KDM4A	97	453	213	235	543	14	447	648	186	198	545	108	637	246	349	1429	463	379	842	421	7	129	165	252	533	290	538	343	577	353	554	456	435	419	122	422	430	243	1211	112	690	187	965	296	191	107	241	248	108
AL451062.4	0	0	0	0	0	0	0	0	0	0	0	0	0	0	0	0	0	0	0	0	0	0	0	0	0	0	0	0	0	0	0	0	0	0	0	0	0	0	0	0	0	0	0	0	0	0	0	0	0
KDM4A-AS1	0	0	2	0	0	0	0	0	0	3	0	0	0	1	0	0	0	2	5	2	1	7	0	1	4	1	5	7	1	0	2	2	5	0	3	1	4	0	0	4	3	6	0	1	2	8	2	6	1
ST3GAL3	39	98	51	13	31	10	68	65	85	124	12	10	95	25	41	163	47	89	90	43	12	104	63	117	38	53	105	124	53	77	63	72	59	70	39	243	8	12	35	36	47	130	79	91	156	80	147	89	127
AL451062.1	0	0	0	0	0	0	0	0	0	0	0	0	0	0	0	0	0	0	0	0	0	0	0	0	0	0	0	0	0	0	0	0	2	0	0	0	0	0	0	0	0	0	0	0	0	0	0	0	0
AL451062.3	0	0	0	0	0	0	0	0	0	0	0	0	0	0	0	0	0	0	0	0	0	0	0	0	0	0	0	2	0	0	0	0	0	0	0	0	0	0	0	0	0	0	0	2	1	1	0	1	0
AL451062.2	0	15	0	0	2	12	14	16	0	0	0	5	8	4	40	82	12	13	13	2	0	3	1	3	1	0	1	3	0	1	0	1	2	2	0	6	0	0	0	0	0	6	1	2	5	5	7	7	1
MIR6079	0	0	0	0	0	0	0	0	0	0	0	0	0	0	0	0	0	0	0	0	0	0	0	0	0	0	0	0	0	0	0	0	0	0	0	0	0	0	0	0	0	0	0	0	0	0	0	0	0
SHMT1P1	0	0	0	0	0	0	0	4	0	0	0	0	0	0	0	1	1	0	0	0	0	0	0	1	0	0	1	0	0	0	0	0	0	0	1	0	4	0	0	3	0	24	0	0	0	0	0	0	0
ARTN	0	0	0	4	4	0	1	3	1	0	0	0	1	8	0	2	2	0	0	10	0	0	4	4	12	10	9	10	9	16	23	9	6	6	7	4	0	0	0	2	0	8	0	1	3	1	2	11	0
AL357079.1	0	0	0	0	0	0	0	0	0	0	1	2	0	0	0	1	0	2	1	10	2	3	11	28	15	4	19	18	9	5	13	21	19	13	19	34	1	0	0	0	0	0	0	17	17	13	38	19	5
AL357079.3	0	0	0	0	0	0	0	0	0	0	1	0	0	0	0	0	1	0	0	12	0	2	4	9	4	9	15	8	10	5	6	10	6	5	1	21	0	0	0	0	0	0	0	2	13	9	9	2	6
IPO13	93	639	84	351	560	117	539	731	259	262	709	90	754	164	144	1041	589	288	558	603	7	52	116	222	543	393	881	442	1260	534	825	550	418	341	126	603	36	339	184	77	369	189	811	165	223	142	255	278	82
AL357079.2	0	0	0	0	0	0	0	0	0	0	0	0	0	0	0	0	0	0	0	2	2	0	0	0	0	0	5	0	0	3	5	1	2	0	5	2	0	0	0	0	0	1	0	0	0	0	0	0	0
DPH2	21	93	43	42	164	21	73	189	40	36	14	33	112	86	3	100	86	49	330	174	4	58	40	67	139	169	261	165	270	242	198	179	124	122	70	117	45	77	73	10	102	45	84	51	64	26	75	75	12
ATP6V0B	87	417	464	301	428	274	452	498	82	173	671	54	794	260	115	355	552	306	493	1722	8	54	92	341	1398	938	3824	573	1564	1885	3053	542	426	827	150	715	7	1154	40	80	134	162	1647	199	294	218	273	612	163
B4GALT2	29	288	58	96	81	60	211	154	39	83	265	43	209	114	53	183	119	152	283	438	6	5	60	142	390	317	805	268	237	498	970	283	165	212	86	247	11	138	60	36	57	31	320	36	59	45	69	136	26
CCDC24	26	281	174	63	422	99	122	636	157	1	152	19	213	76	106	114	341	82	48	156	1	7	89	174	201	128	338	230	239	218	452	184	190	155	27	373	35	139	558	11	179	69	349	66	62	40	81	104	15
SLC6A9	22	113	12	30	131	8	132	85	58	46	101	13	31	46	5	669	95	113	162	142	3	6	46	16	26	49	11	24	37	37	75	65	49	30	22	41	4	4	151	25	146	56	42	2	5	0	6	12	16
AL139220.2	9	15	0	0	0	0	5	18	0	0	0	0	0	12	10	11	12	0	0	9	1	0	1	0	3	9	2	5	4	10	7	3	3	6	25	32	0	0	0	20	0	11	0	3	3	3	6	1	3
AL139220.1	0	0	0	0	2	0	0	1	0	0	2	0	0	0	0	0	0	0	0	0	0	0	1	0	0	0	0	0	0	0	0	0	0	0	0	1	0	0	0	0	0	0	0	0	0	0	0	0	0
KRT8P47	0	3	0	0	0	0	1	0	0	0	0	0	0	1	12	7	0	0	0	0	0	0	0	0	1	1	0	0	0	0	0	0	0	0	1	1	3	0	0	12	0	15	0	1	0	0	1	0	0
RN7SL479P	0	0	0	0	0	0	0	0	0	0	0	0	0	0	0	0	0	0	0	0	3	2	2	1	4	2	7	8	3	12	9	14	7	9	10	2	0	0	0	0	0	0	0	0	0	0	0	0	0
KLF17	0	7	0	0	0	0	3	0	0	0	0	0	0	0	0	0	0	0	1	0	0	0	1	1	0	0	0	1	0	3	2	1	0	0	7	5	10	0	0	17	0	69	0	0	0	0	0	1	3
AL356653.1	1	5	1	8	2	1	13	5	1	14	150	4	5	7	1	44	10	36	166	0	0	0	0	1	2	0	3	1	0	0	0	1	1	1	0	0	8	10	10	20	11	44	34	2	0	2	0	0	0
KLF18	0	0	0	0	0	0	0	0	0	0	0	0	0	0	0	0	0	0	0	0	0	0	0	0	0	0	0	1	0	1	0	0	1	0	5	0	0	0	0	0	0	0	0	0	0	0	0	0	1
AL359839.2	0	0	0	0	0	0	0	0	1	0	0	0	0	0	0	0	0	0	0	0	0	0	0	0	0	0	0	1	0	0	0	0	0	0	1	0	0	0	0	0	0	0	0	0	0	0	0	0	1
AL359839.1	0	0	0	0	0	0	0	0	0	0	0	0	0	0	0	0	0	0	0	0	0	0	0	0	0	0	0	0	0	0	0	0	0	0	0	0	0	0	0	0	0	0	0	0	0	0	1	0	0
OOSP1P1	0	0	0	0	0	0	0	0	0	0	0	0	0	0	0	0	0	0	0	0	0	0	0	0	0	0	0	0	0	0	0	0	0	0	0	0	0	0	0	0	0	0	0	0	0	0	0	0	0
AL035417.1	0	0	0	0	0	0	0	0	0	0	0	0	0	0	0	0	0	0	0	0	0	0	0	0	0	0	0	0	0	0	0	0	0	0	0	0	0	0	0	0	0	0	0	0	0	0	0	0	0
AL035417.2	0	0	0	0	0	0	0	0	0	0	0	0	0	0	0	0	0	0	0	0	0	0	0	0	0	0	1	0	0	0	0	0	0	0	0	1	0	0	0	0	0	0	0	0	1	0	1	0	0
DMAP1	83	409	195	258	813	29	308	807	128	83	101	44	374	138	61	369	354	294	286	263	20	186	241	221	215	199	499	351	371	219	274	386	258	302	116	611	317	233	1223	547	392	81	650	185	214	125	254	194	148
ERI3	186	287	306	182	147	194	457	226	55	109	182	168	790	103	286	750	251	329	664	428	4	42	71	167	442	346	873	257	622	464	605	400	331	366	78	302	31	218	96	67	101	98	455	87	167	84	158	198	59
ERI3-IT1	0	0	0	0	0	0	0	0	0	0	0	0	0	0	0	1	0	1	0	16	0	6	0	14	1	2	11	10	5	9	0	6	5	9	2	29	0	0	0	0	0	0	0	5	21	7	16	15	6
RNU6-369P	0	0	0	0	0	0	0	0	0	0	0	0	0	0	0	0	0	0	0	0	0	0	0	0	0	0	0	1	0	0	0	0	1	0	3	0	0	0	0	0	0	0	0	0	0	0	0	0	0
RNF220	182	706	74	275	646	134	521	872	381	270	468	170	603	369	263	907	595	339	1168	588	13	201	194	186	716	559	1056	491	906	587	949	634	488	669	209	393	294	555	651	104	991	198	1614	196	138	156	163	278	138
MIR5584	0	0	0	0	0	0	0	0	0	0	0	0	0	0	0	1	0	0	0	0	0	0	0	0	0	0	0	0	0	0	0	0	0	0	0	0	0	0	0	0	0	0	0	0	0	1	0	0	0
TMEM53	19	142	2	208	172	36	33	158	68	5	23	5	446	17	54	27	208	20	26	568	1	2	69	86	225	74	896	109	106	257	530	64	56	332	48	185	0	12	1	10	27	13	39	64	302	50	72	229	53
ARMH1	25	252	55	21	360	16	55	342	201	33	2	7	58	1	0	33	256	120	17	26	1	161	13	36	23	20	44	13	6	23	34	9	13	31	7	89	11	60	23	10	28	41	15	28	24	19	11	29	5
RNU5F-1	0	0	0	0	0	0	1	0	0	0	0	0	0	0	0	0	0	1	2	2	0	1	8	5	7	38	7	16	0	23	18	27	15	19	2	1	0	0	0	0	0	0	0	17	12	4	5	23	24
RNU5D-1	0	0	0	0	0	0	6	0	0	0	0	0	0	1	0	1	1	0	1	2	0	0	16	1	10	33	2	5	0	19	6	13	12	6	0	0	0	0	0	0	0	0	1	6	11	1	7	5	17
KIF2C	5	49	0	34	21	0	60	39	0	408	185	64	14	179	95	474	46	71	1637	15	2	26	10	8	20	20	16	42	39	58	40	38	23	23	24	19	10	10	19	27	44	140	45	5	9	5	45	11	8
AL592166.1	0	2	0	0	0	0	0	0	0	0	2	0	2	1	0	4	1	2	4	2	0	2	2	1	3	4	3	1	3	2	4	3	1	0	0	7	0	1	0	1	1	11	0	0	0	0	1	2	0
RPS8	749	1480	1205	618	716	368	3821	486	312	636	2397	845	2432	879	595	3297	1404	1809	6697	6494	62	788	255	539	5061	4088	5641	2309	5586	4604	5070	6480	3813	3321	1446	529	97	1570	321	605	205	710	4832	1449	1431	1294	1113	2620	681
SNORD55	0	0	0	0	0	0	0	0	0	0	0	0	0	0	0	0	0	0	0	0	0	0	0	0	0	0	0	0	0	0	0	0	0	0	0	0	0	0	0	0	0	0	0	0	0	0	0	0	0
SNORD46	119	130	13	160	800	21	118	323	4	10	66	29	74	55	250	59	429	101	223	4	0	0	1	4	2	24	2	10	5	27	4	8	4	4	1	7	0	118	2	0	32	6	904	3	1	3	3	3	8
SNORD38A	5	10	0	11	36	1	6	17	0	0	7	7	11	25	25	10	17	9	24	0	0	3	0	0	0	1	1	0	0	3	1	1	0	2	2	2	0	0	0	0	0	0	2	0	5	0	0	1	0
SNORD38B	0	0	0	0	0	0	0	0	0	0	0	0	0	0	0	0	0	0	0	0	0	0	0	0	0	0	0	0	0	0	0	0	0	0	0	0	0	0	0	0	0	0	0	0	0	0	0	0	0
RPS15AP11	4	1	1	12	0	1	14	0	2	0	19	1	4	5	0	6	4	5	6	2	0	1	0	1	3	5	3	2	2	7	2	2	0	0	0	0	1	0	0	0	0	12	2	0	0	0	2	1	0
BEST4	0	0	0	0	1	0	2	6	0	0	0	0	2	0	0	3	4	2	1	11	2	3	10	15	24	16	29	7	10	24	14	5	8	8	9	22	5	0	4	1	1	7	1	5	5	9	8	5	4
PLK3	92	161	97	76	249	39	161	137	51	114	191	51	168	99	7	118	95	126	275	518	3	120	212	107	126	454	533	202	195	540	164	136	55	350	237	159	6	65	165	9	100	73	111	45	65	45	46	87	42
TCTEX1D4	0	0	2	0	0	0	0	0	0	0	0	0	0	0	0	0	0	0	0	9	0	0	2	11	4	10	10	1	4	6	7	5	9	3	1	8	0	0	0	0	0	0	0	2	0	1	0	2	0
BTBD19	192	80	189	18	198	48	104	140	19	100	31	60	37	97	13	175	88	48	190	167	9	44	191	259	78	143	224	113	32	396	126	83	58	120	61	467	9	121	94	3	102	61	90	49	49	39	57	85	145
PTCH2	8	146	61	37	539	24	80	158	245	56	13	3	78	62	0	116	101	110	104	48	0	20	34	55	14	58	17	71	8	25	21	97	24	22	5	120	4	31	135	40	97	75	57	9	3	8	5	10	9
RNU5E-6P	0	0	0	0	0	0	0	0	0	0	0	0	0	0	0	0	0	0	0	0	0	0	0	0	0	0	0	0	0	0	0	0	0	0	0	0	0	0	0	0	0	0	0	0	0	0	0	0	0
AL136380.1	0	0	0	0	0	0	0	0	0	0	0	0	1	0	0	0	0	0	0	0	0	2	2	2	0	1	1	0	0	1	0	1	1	0	0	0	0	0	0	0	0	0	0	0	4	4	1	2	0
EIF2B3	73	261	22	109	155	82	489	176	70	207	78	65	419	158	61	499	216	399	898	291	1	104	82	92	294	179	367	165	370	354	287	265	178	235	88	178	60	117	114	139	129	255	416	139	136	81	166	220	36
RNA5SP47	0	0	0	0	0	0	0	0	0	0	0	0	0	0	0	0	0	0	0	0	0	0	0	0	0	0	0	0	0	0	0	0	0	0	0	0	0	0	0	0	0	0	0	0	0	0	0	0	0
CCNB1IP1P1	0	0	0	0	0	0	0	0	0	0	0	0	1	0	0	0	0	0	0	0	0	0	0	0	0	0	0	0	0	1	1	0	0	1	0	0	1	0	0	1	0	5	0	0	0	0	0	0	0
PPIAP35	0	0	0	0	0	0	0	0	0	0	1	0	0	0	0	0	1	2	0	0	0	0	1	1	0	0	2	4	1	0	0	2	0	1	0	0	13	0	0	7	0	40	1	0	0	0	0	0	0
MRPS17P1	0	1	1	0	0	0	0	1	0	0	0	0	0	0	0	0	0	0	0	0	0	0	0	0	0	1	0	1	0	0	0	0	0	0	4	1	2	0	0	0	0	2	0	0	0	2	0	1	3
HECTD3	83	679	44	208	709	104	425	638	205	84	44	111	428	228	235	348	689	410	558	368	10	152	233	190	231	282	367	391	473	285	323	559	312	201	83	363	283	216	858	57	727	137	517	47	72	62	85	105	48
UROD	211	880	234	644	548	177	627	567	80	177	603	143	601	165	414	1627	563	301	814	472	10	51	58	136	683	406	874	337	1141	460	764	827	628	467	129	244	70	1011	177	153	377	388	2847	109	114	72	92	234	53
ZSWIM5	295	576	21	345	384	130	640	650	276	95	533	82	1332	104	125	18	436	592	221	645	3	29	80	240	526	220	708	330	317	343	698	338	273	484	99	509	33	103	101	53	134	180	560	263	373	169	345	407	162
OSTCP5	1	4	0	0	0	1	6	14	0	0	4	6	24	0	0	2	6	15	7	0	0	1	0	5	1	1	1	5	0	1	3	0	1	0	0	6	5	0	0	5	1	25	2	8	8	1	9	4	0
LINC01144	0	1	0	0	0	0	3	0	0	0	0	0	0	2	0	2	0	0	0	25	0	2	4	16	36	15	30	6	24	8	32	32	33	16	11	18	0	0	0	0	1	0	0	3	2	1	5	6	2
HPDL	0	3	0	0	0	0	0	0	0	42	0	1	0	3	0	34	11	1	81	2	0	1	0	0	5	2	1	5	6	4	3	12	12	3	0	3	0	0	0	4	0	3	0	0	0	0	3	0	1
MUTYH	5	58	0	19	46	0	37	67	118	68	2	8	79	47	34	25	86	41	77	19	5	22	14	14	7	8	15	35	15	12	5	13	15	13	7	44	17	40	85	10	90	38	72	11	9	11	21	15	6
AL451136.1	0	0	0	0	0	0	0	0	0	0	0	0	0	0	0	0	0	0	0	0	0	0	0	0	0	0	0	0	0	0	0	0	0	0	0	0	0	0	0	0	0	0	0	0	0	0	0	0	0
TOE1	15	183	54	33	123	51	135	160	140	57	8	39	131	58	45	179	190	98	204	74	3	32	16	49	172	139	183	104	158	112	179	191	176	173	47	86	11	129	121	23	55	67	214	61	60	44	70	65	21
TESK2	29	53	27	7	33	21	78	44	59	46	25	12	28	39	0	17	41	59	51	42	0	12	10	21	38	58	70	79	50	37	42	91	51	60	15	53	17	13	22	20	24	54	24	11	17	6	49	35	12
PPIAP36	0	0	0	1	0	0	0	0	0	0	0	0	0	0	0	1	0	1	2	0	0	0	0	0	0	0	0	0	0	1	0	1	0	1	1	0	0	0	0	8	0	32	0	0	0	0	0	0	0
CCDC163	3	45	26	0	4	1	42	0	0	1	47	6	63	4	34	83	11	22	39	54	0	15	4	9	17	22	22	37	26	29	18	15	26	40	5	15	4	6	15	23	3	48	58	31	5	1	8	10	3
MMACHC	12	47	13	89	43	77	140	11	0	19	296	36	50	37	0	125	20	60	132	70	6	25	18	56	144	78	158	160	170	54	129	139	144	92	26	74	21	58	20	40	17	51	124	45	34	30	33	40	21
PRDX1	88	631	99	508	90	159	747	252	110	502	1370	225	465	298	121	1051	385	376	3073	1163	36	182	77	310	4679	1620	2976	1144	6238	1853	2402	3159	4144	1695	377	447	15	213	38	144	137	278	792	649	451	292	328	1316	286
HMGB1P48	0	0	0	0	0	0	0	0	0	0	0	0	0	0	0	0	0	0	0	0	1	0	0	0	0	0	0	0	0	0	0	0	0	0	1	0	0	0	0	0	0	0	0	0	0	0	0	0	0
AKR1A1	102	573	325	208	358	57	641	454	86	593	978	169	440	242	70	701	527	407	937	1029	14	141	71	201	782	647	1357	662	1266	936	1241	743	669	572	160	454	44	890	66	105	207	291	1377	247	260	164	187	568	70
AL355480.3	0	0	0	0	0	0	0	0	0	0	0	0	0	0	0	0	0	0	1	0	0	0	0	0	0	0	0	0	0	0	0	0	0	0	0	0	0	0	0	0	0	0	0	1	1	0	0	1	0
AL355480.1	0	0	0	0	0	0	0	0	0	0	0	0	0	0	0	0	0	0	0	0	0	0	0	0	0	0	1	0	0	1	1	0	0	0	0	0	0	0	0	0	0	0	0	1	2	0	2	1	0
NASP	330	1472	346	425	1342	487	1351	1167	460	1538	2035	477	1948	2104	724	2871	1711	1260	9838	516	30	305	315	408	402	383	721	812	422	615	325	649	380	564	351	477	2214	484	3608	270	2138	393	2223	378	369	184	732	333	191
AL355480.2	0	0	0	0	0	0	0	0	0	0	0	0	0	0	0	0	0	0	0	0	0	0	0	0	0	0	0	0	0	0	0	0	0	0	0	0	0	0	0	0	0	0	0	0	0	0	0	0	0
AL355480.4	0	0	0	0	0	0	0	0	0	0	0	0	0	0	0	0	0	0	0	0	0	0	0	0	0	0	0	0	0	0	0	1	0	0	0	0	0	0	0	0	0	0	0	0	0	0	0	0	0
CCDC17	20	52	0	27	21	35	29	127	38	28	0	7	67	39	0	42	71	27	36	7	0	17	17	44	11	14	23	29	35	20	10	32	30	17	4	38	3	3	7	4	8	39	8	18	11	18	21	13	8
GPBP1L1	531	1385	508	776	1166	253	1349	1116	378	350	1122	217	1953	430	500	1594	1524	822	1488	1877	34	575	373	777	2812	1659	3662	1623	2493	2393	2834	2699	2176	2588	824	1238	289	387	709	159	378	329	1153	1177	985	493	1038	1218	686
RPS15AP10	5	11	0	0	3	9	12	0	0	0	7	2	17	5	0	29	13	20	16	9	0	10	2	20	8	1	7	8	3	17	3	14	11	10	3	30	0	1	0	6	3	8	5	24	13	7	25	23	8
AL604028.2	0	4	0	0	1	0	10	12	11	4	0	2	21	10	0	20	12	5	19	51	0	36	8	44	13	7	31	35	23	22	9	29	18	22	3	91	0	1	1	0	0	6	4	34	40	16	42	43	5
TMEM69	115	214	168	187	92	77	319	44	0	28	225	37	253	38	163	360	197	219	345	145	3	61	18	53	284	104	290	84	193	144	252	195	176	189	36	85	8	30	8	28	9	56	172	63	73	58	84	131	47
IPP	97	446	140	199	248	120	503	431	114	114	248	54	552	113	471	946	374	346	361	293	17	68	57	145	376	281	523	294	353	282	469	379	280	306	50	196	50	141	37	49	122	126	397	155	161	123	207	239	124
AL604028.1	0	2	2	1	1	0	7	4	1	0	1	3	2	7	0	9	0	0	4	20	0	8	9	14	33	27	47	25	27	16	43	24	36	15	3	22	0	0	0	0	0	0	0	7	16	13	29	21	19
AL603882.1	1	0	0	0	0	1	2	1	0	0	0	1	0	0	1	1	0	0	1	0	1	1	0	0	2	2	7	0	4	3	6	4	0	1	3	0	1	0	0	1	0	10	0	0	2	0	0	2	1
MAST2	394	2157	634	536	1582	296	1191	1521	1069	737	1094	407	1350	1050	615	1102	2187	1107	3400	537	12	74	262	244	281	379	490	599	679	479	304	372	155	270	170	315	95	504	413	182	526	404	1149	76	266	123	345	496	66
TMA16P2	0	0	0	0	0	0	0	0	0	0	0	0	0	0	0	0	0	0	0	0	0	0	0	0	1	0	1	0	0	0	0	2	0	0	3	0	0	0	0	0	0	4	0	0	0	0	0	0	1
PIK3R3	17	50	47	50	37	11	39	43	38	7	74	6	48	13	1	61	28	34	75	1076	5	37	165	304	917	532	874	497	708	1695	1038	481	368	588	202	464	9	14	97	4	35	21	32	580	413	118	319	695	338
P3R3URF-PIK3R3	0	0	0	0	0	0	0	0	0	0	0	0	0	0	0	0	0	0	0	0	0	0	0	0	0	0	0	0	0	0	0	0	0	0	0	0	0	0	0	0	0	0	0	0	0	0	0	0	0
AL358075.1	0	0	0	0	0	0	0	0	0	0	0	0	0	0	0	0	0	0	0	0	0	0	0	0	0	0	0	1	0	0	0	0	0	0	0	0	0	0	0	0	0	0	0	0	0	0	1	0	0
AL358075.3	0	0	0	0	0	0	0	0	0	0	0	0	0	0	0	0	0	0	0	0	0	0	0	0	0	0	0	0	0	1	0	0	0	2	0	0	0	0	0	0	0	3	0	0	0	0	0	0	0
AL358075.2	0	0	0	0	0	0	0	0	0	0	0	0	0	0	0	0	0	0	0	4	0	0	1	0	4	2	3	1	1	2	3	2	0	3	0	2	0	0	0	0	0	0	0	2	3	0	0	0	2
TSPAN1	91	765	0	179	543	49	63	792	49	63	224	19	70	254	167	2	514	1	69	430	3	3	10	369	1359	494	336	14	3350	1497	2124	561	1094	449	20	565	3	11	33	126	116	273	266	82	341	104	226	705	63
P3R3URF	0	0	0	0	0	0	0	0	0	0	0	0	0	0	0	0	0	0	0	0	0	0	0	0	0	0	0	0	0	0	0	0	0	0	0	0	0	0	0	0	0	0	0	0	0	0	0	0	0
POMGNT1	273	1343	1450	510	1432	541	1571	1574	378	542	1493	420	3516	447	824	1296	1353	1603	1220	1224	13	86	237	401	1118	756	1710	647	2021	1119	1497	958	948	834	194	703	157	1518	906	302	926	709	3922	285	394	214	344	516	165
LURAP1	2	8	0	14	20	1	8	10	0	12	0	0	1	2	0	3	9	1	5	92	0	3	32	102	152	91	102	23	403	34	95	223	220	91	23	134	1	0	2	4	0	19	3	9	32	10	1	60	38
RAD54L	16	65	0	32	125	158	72	80	74	457	719	82	52	534	0	681	39	133	1850	13	0	7	9	7	7	7	12	20	10	17	5	17	10	7	9	27	23	3	13	125	14	544	29	3	24	4	31	7	6
LRRC41	147	440	354	303	426	81	474	475	327	255	298	57	676	166	187	1445	346	374	688	1227	8	166	88	441	843	850	1264	530	1359	1138	1248	916	640	581	239	840	23	315	51	42	188	182	611	221	339	175	362	400	233
UQCRH	294	806	238	260	312	160	1211	576	161	313	1431	526	769	649	846	907	621	591	2974	577	10	33	37	29	582	306	859	335	586	492	683	434	320	320	130	52	39	606	132	233	216	279	3073	275	258	179	408	491	120
NSUN4	44	127	7	56	218	32	167	115	76	94	223	44	200	61	0	197	216	120	288	314	5	85	67	160	473	302	491	238	398	308	503	470	377	348	111	252	65	89	145	29	89	65	298	167	152	100	215	182	119
AL122001.1	0	0	0	0	0	0	1	0	0	0	0	0	0	0	0	1	0	0	0	0	0	0	0	2	0	1	1	1	1	1	0	0	0	4	5	2	0	0	0	0	0	0	0	2	2	4	4	1	2
FAAH	55	663	264	205	957	74	668	1706	329	27	177	71	1064	647	112	648	704	1117	100	269	1	19	98	246	394	204	415	179	1129	437	374	601	659	265	26	323	242	571	548	53	1174	311	908	54	83	62	109	170	41
FAAHP1	0	1	0	0	0	0	0	0	0	0	0	0	0	0	0	3	0	0	0	0	0	2	5	29	10	7	15	6	16	2	3	18	17	2	7	14	0	0	0	0	2	0	0	0	4	8	6	2	5
LINC01398	0	0	0	0	0	0	0	0	0	0	0	0	0	0	0	0	0	0	0	0	0	0	0	0	0	0	0	0	0	0	0	0	0	0	3	0	0	0	0	0	0	0	0	0	0	0	0	0	0
DMBX1	0	0	0	0	0	0	0	0	2	1	0	0	0	0	0	0	0	0	1	0	2	0	0	1	1	6	1	1	0	0	1	0	0	6	3	0	1	0	0	3	0	14	0	0	1	0	0	0	0
TMEM275	0	0	0	0	0	0	0	0	0	0	0	0	0	0	0	0	0	0	0	0	0	0	0	0	0	0	0	0	0	0	0	0	0	1	0	0	0	0	0	0	0	0	0	0	0	0	0	0	0
MKNK1-AS1	0	0	0	0	0	0	0	0	0	0	0	0	0	0	0	0	0	1	0	0	0	0	0	5	0	0	0	0	0	2	0	1	0	0	1	2	0	0	0	0	0	3	0	0	0	2	2	0	1
KNCN	0	0	0	0	0	0	0	0	0	0	0	0	0	0	0	0	0	0	0	0	1	0	2	2	8	0	4	0	0	5	3	0	0	1	3	5	0	0	0	0	0	12	0	0	1	1	2	0	3
MKNK1	98	568	271	157	572	105	1302	422	250	76	143	45	926	177	122	640	623	343	564	310	7	109	101	211	156	230	210	305	183	235	135	300	164	193	133	477	1664	145	847	32	839	118	308	130	126	96	239	146	88
MOB3C	64	128	36	10	241	33	225	126	55	0	11	17	267	40	54	67	128	84	78	224	4	49	127	92	194	352	283	259	300	389	276	465	279	261	176	151	37	88	180	42	96	51	139	53	72	52	79	80	72
ATPAF1	369	530	546	166	276	353	725	239	25	170	896	45	941	98	333	1921	302	420	460	345	6	82	54	262	857	415	1363	420	995	720	1066	778	644	647	166	256	44	144	25	57	53	143	498	358	306	210	377	394	338
NENFP1	0	1	5	0	0	0	2	0	0	0	0	0	0	0	0	8	0	0	1	0	0	0	0	2	0	0	2	2	1	0	0	1	1	2	0	8	0	0	0	0	0	0	0	2	2	1	2	0	3
TEX38	2	5	0	0	0	24	5	5	0	0	0	0	5	1	0	0	0	0	0	2	1	0	0	2	3	1	3	0	4	0	4	0	1	0	3	3	1	10	3	9	2	20	5	0	0	0	1	2	0
EFCAB14-AS1	0	0	0	0	0	0	0	0	0	0	0	0	0	0	0	0	0	0	0	0	0	0	0	0	0	0	0	0	0	0	0	0	0	1	0	0	2	0	0	11	1	5	0	0	0	0	0	0	0
EFCAB14	1063	1521	982	610	904	419	2035	1124	215	129	1851	110	3509	384	1290	2934	1394	1138	1009	2430	31	683	210	1189	3327	2992	4749	2223	2774	2871	4521	4059	2664	2968	1124	1171	145	487	280	179	505	323	987	1010	784	720	935	1048	1211
AL593856.1	0	0	0	0	0	0	0	0	0	0	0	0	0	0	0	0	0	0	2	0	0	0	0	0	0	0	0	0	0	0	0	0	0	1	4	0	0	0	0	0	0	0	0	0	0	0	0	0	0
CYP4B1	81	14	76	1	22	0	10	29	0	0	0	0	8	2	0	37	124	0	11	6	6	4	2	80	28	116	18	63	206	174	26	112	115	129	10	16	13	1	6	12	7	73	3	3	1	1	1	22	16
CYP4Z2P	0	0	0	0	0	0	0	0	0	0	0	0	1	0	0	0	0	4	0	0	0	0	1	0	0	0	0	0	0	0	0	3	0	0	2	0	2	0	3	3	0	51	0	0	0	0	0	1	2
AL731892.1	0	0	0	0	0	0	0	0	0	0	0	0	1	0	0	1	0	0	0	0	0	0	0	0	0	0	0	0	0	0	0	0	1	0	0	1	0	0	0	0	0	2	0	0	0	0	0	0	0
CYP4A11	5	3	0	817	0	0	9	0	0	0	28	0	2	0	0	1	6	6	0	2	0	0	6	1	0	1	0	1	0	1	0	2	1	0	2	0	2	0	12	22	8	54	1	2	0	1	0	0	1
CYP4A26P	0	0	0	0	0	0	0	0	0	0	0	0	0	0	0	0	0	0	0	0	0	0	0	0	0	0	0	1	0	0	0	0	0	0	1	0	0	0	0	0	0	0	0	0	0	0	0	0	0
CYP4A43P	0	0	0	0	0	0	0	0	0	0	0	0	0	0	0	0	0	0	0	0	0	0	0	0	0	0	0	0	0	0	0	0	0	0	0	0	0	0	0	0	0	0	0	0	0	0	1	1	0
CYP4A27P	0	0	0	0	0	0	0	0	0	0	0	0	0	0	0	0	0	0	0	0	0	0	0	0	0	0	0	0	0	0	0	0	0	0	1	2	0	0	0	0	0	0	0	1	0	0	0	1	0
CYP4A44P	0	0	0	0	0	0	0	0	0	0	0	0	0	0	0	0	0	0	0	0	0	0	0	0	0	0	0	0	0	0	0	0	0	1	1	0	0	0	0	0	0	0	0	0	0	0	0	0	0
CYP4X1	39	50	8	39	52	7	182	41	0	52	943	9	47	20	0	58	63	92	12	272	1	2	23	52	207	312	183	83	19	551	127	133	58	53	22	40	10	2	44	35	14	115	45	23	88	119	98	41	61
CYP4Z1	3	0	0	1	2	0	7	2	17	0	22	0	5	0	0	12	0	10	0	2	3	0	2	3	3	17	0	6	4	26	3	11	1	8	5	0	1	0	0	17	0	78	1	2	5	5	2	1	4
AL450996.1	0	1	0	0	0	0	0	0	0	0	0	0	0	0	0	1	0	0	0	0	0	0	0	1	0	0	0	0	0	0	0	0	0	0	0	0	0	0	0	0	0	7	0	0	0	0	0	0	1
CYP4A22-AS1	0	0	0	0	0	0	0	0	0	0	0	0	0	0	0	0	0	0	0	0	0	0	0	1	0	0	0	0	1	0	0	0	0	0	1	0	0	0	0	0	0	0	0	0	0	0	0	0	0
CYP4A22	10	0	0	57	0	0	0	0	0	0	9	0	0	3	0	0	0	0	0	0	2	0	0	0	0	0	0	0	0	0	0	0	1	0	2	0	11	0	2	34	1	66	0	0	0	1	0	0	0
MTND1P34	0	0	0	0	0	0	0	0	0	0	0	0	0	0	0	0	0	0	0	0	0	0	0	0	0	0	0	0	0	0	0	0	0	1	1	0	0	0	0	0	0	3	0	0	0	0	0	0	1
LINC00853	0	0	0	0	0	0	0	0	0	0	0	0	0	0	0	0	0	0	0	0	1	0	0	1	1	4	1	0	1	1	4	3	2	2	1	0	0	0	0	0	0	0	0	0	1	0	0	1	1
PDZK1IP1	6	41	0	0	0	13	108	19	0	0	188	0	0	75	0	82	5	13	10	6	0	0	0	1	1	17	2	0	2	14	21	23	1	5	6	1	28	0	22	6	0	11	11	0	0	1	1	1	0
TAL1	2	24	0	10	12	4	15	35	1	0	5	110	12	5	0	8	5	3	11	67	3	6	36	29	31	173	30	169	58	128	24	427	90	112	47	29	1	1	0	10	2	24	5	2	20	13	11	23	41
AL135960.1	0	0	0	0	0	0	0	0	0	0	0	0	0	0	0	0	0	0	0	0	0	0	0	1	1	0	0	0	0	0	0	0	0	0	6	0	0	0	0	0	0	0	0	0	0	0	0	0	0
STIL	44	151	0	72	89	48	587	13	100	271	253	145	106	196	0	1319	187	422	1072	34	2	29	11	26	57	31	49	58	31	99	55	81	45	50	27	42	36	23	21	83	28	381	35	32	32	21	95	31	9
CMPK1	475	1408	527	664	502	229	1295	477	248	352	2441	420	1120	408	1619	1407	1213	460	1049	796	53	419	158	372	2786	1664	3123	1424	1745	2073	2841	3791	2805	2172	1114	263	50	547	121	224	101	292	1336	606	499	287	897	912	522
LINC01389	0	0	0	0	0	0	0	0	0	0	0	0	0	0	0	0	0	0	0	0	0	0	0	0	0	0	0	0	0	0	0	0	0	1	6	0	0	0	0	0	0	0	0	1	0	0	0	0	0
FOXE3	0	0	0	0	0	0	0	0	0	30	0	0	0	0	0	0	0	0	0	0	0	0	0	0	0	0	0	0	0	0	0	1	0	0	0	0	0	0	0	13	0	2	0	0	0	0	0	0	0
FOXD2-AS1	0	0	0	0	1	0	0	0	0	0	0	0	0	0	0	0	1	0	0	24	0	8	11	7	2	4	3	30	2	4	5	15	3	4	5	3	0	0	0	0	0	0	0	1	0	1	6	1	2
FOXD2	0	24	0	94	39	0	24	0	0	1	0	4	20	85	0	3	10	16	13	21	0	1	6	9	7	12	3	7	2	1	6	7	3	5	5	6	5	0	0	0	3	38	1	2	1	0	2	3	3
AL356458.1	0	0	0	0	0	0	0	0	0	0	0	0	0	0	0	0	0	0	0	0	0	0	0	0	0	0	0	0	0	0	0	0	0	0	1	0	0	0	0	0	0	0	0	0	0	0	0	0	0
RPL21P24	0	0	0	0	0	0	0	1	0	0	0	0	0	0	0	0	0	0	0	0	0	0	0	0	0	0	0	0	0	0	0	0	1	0	0	0	0	0	0	0	0	4	0	0	0	0	0	0	1
ATP6V0E1P4	0	0	0	0	0	0	0	0	0	0	0	0	0	0	0	0	0	0	0	0	1	0	0	0	0	0	0	0	0	0	0	0	0	0	0	0	0	0	0	0	0	0	0	0	0	0	0	0	0
LINC01738	0	0	0	0	0	0	0	0	0	0	0	0	0	0	0	0	0	0	0	2	0	0	0	0	0	1	29	23	3	318	0	0	0	10	26	1	0	0	0	0	0	2	0	6	21	1	222	39	0
TRABD2B	4	42	0	10	45	5	70	17	147	0	35	0	15	6	45	42	25	7	40	76	0	2	2	1	6	110	6	37	9	46	21	77	4	5	103	26	28	0	87	16	13	28	15	9	5	11	4	6	17
AL691459.1	0	0	0	0	0	0	0	0	0	0	0	0	0	0	0	0	0	0	0	0	0	0	0	0	0	0	0	0	0	0	0	0	0	0	0	0	0	0	0	0	0	0	0	0	0	0	0	0	0
AC096541.1	0	0	0	0	0	0	0	0	0	0	0	0	0	0	0	0	0	0	0	0	0	0	0	1	0	1	0	2	0	2	0	1	0	0	1	0	0	0	0	0	0	0	0	0	0	0	10	0	0
LINC02794	0	0	0	0	0	0	0	0	0	0	0	0	0	0	0	0	0	0	0	2	0	0	0	0	0	3	0	1	0	3	2	5	0	3	8	0	0	0	0	0	0	0	0	0	0	0	1	0	2
AL356289.1	0	0	0	0	0	0	0	0	0	0	0	0	0	0	0	0	0	0	0	0	0	0	0	0	0	0	0	0	0	0	0	1	0	0	0	1	0	0	0	0	0	0	0	0	0	0	0	1	0
CYP46A4P	0	0	0	0	0	0	1	0	0	0	0	0	0	0	0	0	3	0	1	0	0	0	0	0	0	0	0	0	0	0	0	0	0	0	1	1	0	0	0	0	0	4	0	0	0	0	0	0	0
SKINT1L	0	0	0	0	0	0	0	0	0	0	0	1	0	0	0	3	0	0	0	5	0	2	0	21	19	1	21	2	0	4	2	2	3	3	11	24	0	0	0	0	0	0	0	18	14	5	5	25	1
AL356289.2	0	0	0	0	1	0	0	0	0	0	0	0	0	0	0	1	0	0	0	2	2	0	0	0	2	0	0	0	0	0	1	5	0	7	13	1	0	0	0	0	0	0	0	0	2	0	1	1	1
AL109659.1	0	0	0	0	0	0	0	0	0	0	0	0	0	0	0	0	0	0	0	0	1	0	0	0	2	0	2	0	0	0	0	0	0	0	0	2	0	0	0	0	0	0	0	0	0	1	1	0	0
SLC5A9	2	326	0	67	768	46	53	648	351	0	11	2	12	4	48	1	447	1	9	4	0	0	1	2	2	2	6	1	2	7	2	1	0	1	11	3	64	3	58	25	4	98	14	1	3	3	4	5	0
AL109659.2	0	15	31	1	14	0	3	15	0	19	0	1	28	1	0	6	21	0	10	16	1	3	4	10	7	10	20	7	1	7	2	4	12	8	6	44	6	0	16	4	3	15	0	8	6	4	10	18	13
AL109659.3	0	0	0	0	0	0	0	0	0	0	0	0	0	0	0	0	0	0	0	2	1	0	0	0	11	0	1	3	0	3	7	3	2	2	4	1	0	0	0	0	0	0	0	3	2	3	4	6	0
SPATA6	219	513	78	250	299	95	573	371	148	65	1115	102	1286	51	133	573	656	279	421	410	11	43	59	313	618	311	1165	259	368	423	581	667	587	675	125	441	25	60	142	56	157	177	308	337	265	134	361	601	255
PPP1R8P1	0	3	0	0	20	0	2	6	23	0	0	2	6	2	0	12	10	1	1	23	0	5	6	28	10	2	45	10	4	17	5	11	7	21	8	86	1	0	5	0	4	10	2	29	19	17	29	32	1
RNU6-723P	0	0	0	0	0	0	0	0	0	0	0	0	0	0	0	0	0	0	0	0	0	0	0	0	0	0	0	0	0	0	0	0	0	0	2	0	0	0	0	0	0	0	0	0	0	0	0	0	0
AL356968.2	0	2	0	0	6	6	2	0	0	0	0	0	0	9	0	1	5	9	2	0	0	0	0	0	1	0	0	1	0	1	1	1	1	0	0	1	16	0	0	23	0	46	1	0	0	0	0	1	0
RNU4-61P	0	0	0	0	0	0	0	0	0	0	0	0	0	0	0	0	0	0	0	0	0	0	0	0	0	0	0	0	0	0	0	0	0	0	0	0	0	0	0	0	0	0	0	0	0	0	0	0	0
AL356968.1	0	0	0	0	0	0	0	0	11	0	0	0	0	0	0	0	0	0	0	0	0	0	0	3	0	0	0	0	0	0	0	0	0	0	0	2	0	0	0	0	0	0	0	1	0	0	0	0	0
AGBL4	91	346	62	143	571	25	121	411	113	38	0	30	349	1	49	38	282	96	2	39	7	0	21	105	79	44	112	29	36	45	102	59	35	89	32	291	10	42	96	44	181	128	251	154	57	107	114	55	51
AL391844.1	0	0	0	0	0	0	0	0	0	0	0	0	0	0	0	0	0	0	0	0	1	0	0	0	2	0	0	0	0	1	0	0	1	0	1	1	0	0	0	0	0	0	0	0	0	0	0	0	0
BEND5	86	140	93	71	210	17	131	57	30	2	259	3	181	0	4	87	102	105	14	67	0	23	45	65	100	58	85	48	92	102	124	113	75	57	10	130	21	39	123	12	89	31	115	33	31	18	82	26	12
AL645507.1	0	0	0	0	0	0	0	0	0	0	0	0	0	0	0	0	0	0	0	0	0	0	0	0	0	1	0	0	0	0	0	0	0	1	0	0	3	0	0	0	0	0	0	0	0	0	1	0	0
AC099788.1	0	0	0	0	0	0	0	0	0	0	0	0	0	0	0	0	0	0	0	0	0	0	0	0	0	0	0	0	0	0	0	0	0	0	1	0	0	0	0	0	0	0	0	0	0	0	1	0	0
AGBL4-AS1	0	0	0	0	0	0	0	0	0	0	0	0	0	0	0	0	0	0	0	0	0	0	0	0	0	0	0	0	0	0	0	0	0	0	0	0	0	0	0	0	0	0	0	0	0	0	0	0	1
AGBL4-IT1	0	1	0	0	0	0	2	0	0	0	0	0	1	0	0	0	2	0	0	7	3	0	0	13	4	3	5	3	0	2	3	6	4	14	7	18	0	0	0	0	0	0	0	43	16	11	0	14	19
AL390023.1	0	1	0	0	0	0	2	0	0	0	0	0	1	0	0	1	1	1	0	2	0	0	1	8	6	0	6	2	2	5	0	1	5	4	0	32	0	0	0	0	2	0	3	14	0	1	0	9	1
ZNF859P	0	0	0	0	0	0	0	0	0	0	0	0	0	0	0	1	0	0	0	0	1	0	0	0	0	0	0	0	0	0	0	0	0	0	2	0	4	0	3	35	1	51	0	0	0	0	0	0	0
AL645730.1	0	0	0	0	0	0	0	0	0	0	0	0	0	0	0	0	0	0	0	0	1	0	1	0	0	0	0	0	0	0	0	0	0	0	2	0	0	0	0	1	0	7	0	0	0	0	0	0	4
MTND2P29	0	0	0	0	0	0	0	0	0	0	0	0	0	0	0	0	0	0	0	0	0	0	0	0	0	0	0	0	0	0	0	0	0	0	0	0	0	0	0	0	0	0	0	0	0	0	0	0	0
ELAVL4	779	171	101	132	126	10	345	211	0	121	265	0	1710	2	4	4	239	235	953	252	6	2	35	209	283	83	329	29	0	120	314	3	3	397	71	386	27	237	1813	41	1958	111	904	634	138	121	2	154	65
AL583843.1	1	0	0	0	0	0	1	0	0	0	0	0	0	0	0	0	0	0	1	0	1	0	0	1	2	0	1	0	0	1	2	0	0	7	4	15	0	0	0	0	0	0	0	15	4	5	0	2	4
ELAVL4-AS1	0	0	0	0	0	0	0	0	0	0	0	0	0	0	0	0	0	0	0	2	1	0	0	0	0	0	1	0	0	0	0	0	0	0	7	0	0	0	0	0	0	0	0	0	0	0	0	0	0
AL592182.1	0	0	0	0	0	0	0	0	0	0	0	0	0	0	0	0	0	0	0	0	0	0	0	0	1	0	0	0	0	0	0	0	0	0	1	2	0	0	0	0	0	0	0	0	0	0	0	0	0
LINC02808	0	0	0	0	0	0	7	0	0	0	0	0	0	0	0	0	0	2	0	0	0	0	0	5	1	2	3	8	0	2	6	0	0	2	3	15	0	0	0	0	0	0	3	7	3	0	0	1	1
AL592182.2	0	0	0	0	0	0	0	0	0	0	0	0	0	0	0	0	0	0	0	0	2	0	0	0	0	0	0	1	0	0	0	2	1	1	17	1	0	0	0	0	0	0	0	0	0	0	0	0	0
AL596275.1	0	0	0	0	0	0	0	0	0	0	0	0	1	0	0	0	0	2	1	0	0	0	0	0	0	0	0	0	0	0	0	2	0	0	0	0	1	0	0	4	0	4	0	0	0	0	0	0	0
HMGB1P45	0	0	0	0	0	0	0	0	0	0	0	1	0	0	0	3	0	0	0	0	2	0	0	0	0	0	0	0	0	0	0	0	0	0	1	0	1	0	0	1	0	6	0	0	0	0	0	0	0
FCF1P6	0	0	0	0	0	0	0	0	0	0	0	1	0	0	0	17	1	1	0	0	0	2	1	0	0	2	2	1	0	0	0	3	1	3	0	2	1	1	0	11	0	28	0	0	0	0	0	0	1
DMRTA2	0	0	0	0	0	0	0	0	0	0	0	0	0	1	0	4	0	0	3	2	1	0	1	0	0	0	0	0	0	1	0	0	0	0	1	0	0	0	0	0	0	1	0	0	0	0	1	0	0
AL049637.1	0	0	0	0	0	0	0	0	0	0	0	0	0	0	0	0	0	0	0	0	0	0	0	0	0	0	0	0	0	0	0	0	0	0	0	0	0	0	0	0	0	0	0	0	0	0	0	0	0
FAF1	492	1323	977	644	659	315	1885	686	329	599	1080	361	2203	407	1015	1672	1111	1344	2812	676	13	253	188	507	1038	622	1387	399	1153	1175	878	1047	899	992	280	536	1102	536	1622	266	1537	370	1710	577	409	316	322	417	217
FAF1-AS1	0	0	0	0	0	0	0	0	0	0	0	0	0	0	0	0	0	0	0	0	0	0	0	0	0	0	1	0	0	0	0	0	0	0	3	0	0	0	0	0	0	0	0	0	0	0	0	1	1
RNU6-1026P	0	0	0	0	0	0	0	0	0	0	0	0	0	0	0	0	0	0	0	0	0	0	0	0	0	0	0	0	0	0	0	0	0	0	0	0	0	0	0	0	0	2	0	0	0	0	0	0	0
PHBP12	0	0	0	0	0	0	0	0	0	0	0	0	0	0	0	0	0	0	0	0	0	0	0	0	0	0	0	0	0	0	0	0	0	1	0	0	0	0	0	0	0	1	0	0	0	0	0	0	0
MRPS6P2	0	0	0	0	0	0	0	0	0	0	0	0	0	0	0	0	0	0	0	0	0	0	0	0	0	0	0	0	0	0	0	0	0	0	0	0	0	0	0	0	0	7	0	0	0	0	0	0	0
CDKN2C	20	110	0	18	34	84	124	36	68	7	1108	16	83	51	75	109	43	61	1011	80	1	7	10	33	107	132	288	146	63	164	82	320	49	58	45	19	12	16	4	49	22	78	558	35	12	40	11	28	25
MIR4421	0	0	0	0	0	0	0	0	0	0	0	0	0	0	0	0	0	0	0	0	0	0	0	0	0	0	0	0	0	0	0	1	0	0	0	0	0	0	0	0	0	0	0	0	0	0	0	0	0
MIR6500	0	0	0	0	0	0	0	0	0	0	0	0	0	0	0	0	0	0	0	0	0	0	1	0	0	0	0	0	0	0	0	0	0	0	0	0	0	0	0	0	0	0	0	0	0	0	0	0	1
C1orf185	0	1	0	0	0	0	0	0	0	0	0	0	1	0	0	2	1	6	1	0	0	0	0	1	1	0	0	0	0	0	0	2	0	1	2	1	4	0	0	5	0	18	0	0	0	0	0	0	2
AL162430.1	0	0	0	0	0	0	0	0	0	0	0	0	0	0	0	0	0	0	0	0	0	0	0	0	0	0	0	0	0	0	0	0	0	0	0	0	0	0	0	0	0	0	0	0	0	0	0	0	0
CFL1P2	0	1	0	0	1	0	0	2	0	0	0	0	0	0	0	0	0	0	0	0	0	0	0	0	0	0	0	1	1	1	1	0	0	2	1	0	1	0	0	1	0	3	0	0	0	0	0	1	0
LINC01562	0	2	5	0	0	0	1	0	0	0	0	0	0	0	0	1	0	0	0	14	2	0	5	16	18	5	43	2	0	3	8	2	2	0	5	26	0	0	0	2	0	4	0	13	9	10	1	1	7
RNF11	354	695	366	278	194	127	962	384	205	48	624	31	1005	57	196	756	491	446	348	1270	64	133	224	613	3843	1813	5108	973	1879	2548	4630	2501	1931	2543	1084	482	10	309	39	114	114	134	976	1222	795	599	649	1142	617
AL162430.2	1	2	0	1	1	0	4	1	0	0	0	0	1	0	0	1	2	1	3	2	0	0	0	0	1	0	0	0	0	1	0	1	0	0	2	0	2	0	0	3	1	3	0	0	0	0	0	0	0
AL162430.3	0	1	0	0	0	0	1	0	0	0	0	0	0	1	0	0	1	1	0	0	0	0	1	2	0	1	2	0	0	2	0	0	0	0	0	0	0	0	0	0	0	0	0	2	2	0	1	1	0
TTC39A	185	396	407	194	570	150	321	806	162	2	90	33	769	46	171	556	413	228	26	778	10	5	183	396	837	298	1037	251	1204	797	1386	87	125	375	142	722	21	570	191	50	647	205	1570	178	238	213	113	341	149
TTC39A-AS1	11	25	0	10	14	0	14	43	0	0	0	1	44	1	0	2	14	9	0	37	1	0	4	16	38	15	43	16	38	27	68	0	3	14	1	77	0	5	0	0	2	1	28	3	9	8	4	16	3
EPS15	1078	2664	1479	1256	2017	872	3346	1393	944	405	4002	361	4747	313	1253	3380	3011	1954	2384	1536	50	720	465	756	1912	1951	2676	1733	2143	2350	2030	3087	1835	2484	1075	1025	867	683	3520	388	2631	497	2239	738	1010	458	852	1230	722
AL671986.1	0	0	0	0	0	0	0	0	0	0	0	0	1	0	0	0	0	3	1	2	0	0	0	3	0	0	0	2	0	1	0	0	0	0	0	5	1	0	0	12	0	11	0	0	0	0	0	0	0
RNU6-877P	0	0	0	0	0	0	0	0	0	0	0	0	0	0	0	0	0	0	0	0	0	0	0	0	0	0	0	0	0	0	0	0	0	0	0	0	0	0	0	0	0	0	0	0	0	0	0	0	0
AC104170.1	0	0	0	0	0	0	0	0	0	0	0	0	0	0	0	0	0	0	0	0	0	0	0	0	0	0	0	1	0	0	0	0	0	0	10	0	0	0	0	0	0	0	0	0	0	0	0	0	0
EPS15-AS1	0	0	0	0	0	0	1	1	0	1	0	0	0	2	0	0	0	0	0	3	0	2	1	2	2	1	2	0	0	7	1	1	0	1	0	1	0	0	0	0	0	0	0	0	1	3	5	4	1
RNU6-1281P	0	0	0	0	0	0	0	0	0	0	0	0	0	0	0	0	0	0	0	0	0	0	0	0	0	0	0	0	0	0	0	0	0	1	3	0	0	0	0	0	0	0	0	0	0	0	0	0	0
CALR4P	0	0	0	0	0	0	0	0	0	0	0	0	0	0	0	0	0	0	0	0	4	0	0	0	0	0	0	0	0	0	0	1	1	2	13	0	0	0	0	0	0	0	0	0	0	0	0	0	0
OSBPL9	863	2169	926	1364	1487	434	3113	1324	498	523	3424	201	2366	335	1801	3342	2203	1623	2159	1201	24	303	209	648	1603	796	1549	557	1766	1294	1398	1476	1571	1459	566	781	535	841	611	225	920	599	2432	849	586	357	763	801	410
GAPDHP51	0	0	0	0	0	0	0	0	0	0	0	0	0	0	0	0	0	0	0	0	0	0	0	0	0	0	0	1	0	0	0	0	1	0	13	0	0	0	0	0	0	0	0	0	0	0	0	0	0
SLC25A6P3	0	0	0	0	0	0	0	0	1	0	0	0	0	1	0	0	0	0	0	6	0	0	0	3	0	3	1	1	2	3	0	5	1	2	0	8	0	0	0	0	0	0	0	0	2	0	1	1	0
AL050343.1	0	0	0	0	0	0	0	0	0	0	0	0	0	0	0	0	0	0	0	0	0	0	0	0	0	0	0	0	0	0	0	0	0	0	0	0	0	0	0	0	0	1	0	0	0	0	0	0	0
NRDC	2276	4739	1894	2248	7003	983	5783	12193	2051	1827	3620	1364	7551	4377	1939	10419	4813	4386	9134	1625	18	536	263	860	1653	1296	3029	971	1338	1977	2369	1503	997	1691	662	1128	9169	1297	15299	2768	5920	2399	3952	1017	945	539	720	1376	432
AL050343.2	1	12	0	1	0	0	11	6	0	0	5	0	2	0	7	3	3	5	2	8	0	2	0	7	10	5	12	2	4	1	8	18	4	8	11	6	1	0	0	1	0	3	0	16	7	6	4	6	7
AL050343.3	0	0	0	0	0	0	0	0	0	0	0	0	0	0	0	0	0	0	0	0	0	0	0	0	2	2	2	0	0	1	0	0	2	0	0	1	0	0	0	0	0	0	0	1	1	0	2	1	1
MIR761	0	0	0	2	0	0	0	0	0	0	0	0	1	0	0	0	0	0	0	0	0	0	0	0	0	0	0	0	0	0	0	0	0	0	0	2	0	0	0	0	0	0	0	0	0	0	0	0	0
TSEN15P2	0	0	0	0	0	0	0	0	0	0	0	0	0	0	0	0	0	0	0	0	0	0	0	0	0	0	0	0	0	0	0	0	0	0	0	0	0	0	0	0	0	0	0	0	0	0	0	0	0
RAB3B	82	758	398	612	1028	137	131	674	1339	150	62	2	1917	58	169	4	470	41	56	11	27	3	5	138	226	1355	83	16	2	3900	122	4	0	19	169	8	1	399	58	34	204	29	1546	165	12	32	1879	224	14
RNA5SP48	0	0	3	1	0	0	1	0	0	0	0	0	0	0	0	1	0	0	0	0	0	0	0	0	0	0	0	0	0	0	0	0	0	0	0	0	0	0	0	0	0	0	0	0	0	0	0	0	0
AL445685.2	0	0	0	0	0	0	0	0	0	0	1	0	0	0	0	0	0	0	0	0	1	0	0	0	0	0	0	0	0	0	0	1	0	0	4	0	0	0	0	4	0	8	0	0	0	0	0	0	0
RN7SL290P	0	0	0	0	0	0	0	0	0	0	0	0	0	0	0	0	0	0	0	0	0	0	0	0	0	0	0	1	0	0	1	0	0	0	0	0	0	0	0	0	0	0	0	0	0	0	0	0	0
TXNDC12	37	56	64	55	39	1	61	105	12	33	36	18	88	42	5	151	27	38	99	47	1	14	14	21	62	73	131	34	105	113	98	53	45	31	5	34	5	109	19	0	25	15	73	11	17	10	10	22	8
AL445685.3	0	0	0	0	0	0	0	0	0	0	0	0	0	0	0	0	0	0	0	0	0	0	0	0	0	0	0	0	0	0	0	0	0	0	0	0	0	0	0	0	0	0	0	0	0	0	0	0	0
KTI12	0	0	0	0	0	0	0	0	0	0	0	0	0	0	0	0	0	0	0	27	1	9	2	12	44	16	53	15	19	64	32	36	32	22	21	10	0	0	0	0	0	0	0	19	17	14	12	12	8
AL445685.1	0	0	0	0	1	0	0	0	0	0	0	0	0	0	0	0	1	0	0	0	1	0	0	0	1	1	0	1	1	1	1	0	0	0	0	0	0	0	0	0	0	0	0	0	0	0	0	0	0
TXNDC12-AS1	0	0	0	0	0	0	0	0	0	0	0	0	0	0	0	0	0	0	0	0	0	0	0	0	0	0	0	0	0	0	0	0	0	0	1	0	0	0	0	0	0	0	0	0	0	0	0	0	0
BTF3L4	141	165	210	104	200	73	330	71	59	192	305	28	299	91	117	556	232	193	532	403	10	127	52	155	1071	346	978	321	260	539	726	377	392	694	245	157	25	147	59	39	78	82	328	450	355	245	312	428	387
ZFYVE9	579	1214	423	460	692	296	1877	677	375	195	1873	104	1501	182	471	3249	912	683	2363	620	11	94	66	285	1086	606	969	358	1329	944	940	1227	1140	766	184	467	119	683	181	115	392	519	2393	293	260	200	203	625	197
RN7SL788P	0	0	0	0	0	0	0	0	0	0	0	0	0	0	0	0	0	0	0	0	0	0	2	1	0	0	1	1	0	1	0	1	1	1	0	0	0	0	0	0	0	0	0	4	3	2	1	1	1
AL139156.2	0	0	0	0	0	1	0	0	0	0	0	0	0	0	0	0	0	0	0	1	0	0	0	0	0	0	0	0	0	0	0	0	1	0	0	0	1	0	0	0	0	2	0	0	0	0	0	0	0
AL139156.1	0	0	0	0	0	0	0	0	0	0	0	0	0	0	0	0	0	0	0	0	2	0	0	0	0	0	0	0	0	0	0	0	0	0	4	0	0	0	0	0	0	1	0	0	0	0	0	0	0
PDCL3P6	2	7	0	18	2	9	7	0	11	0	0	4	31	8	0	8	6	2	56	2	1	3	2	3	2	0	4	3	1	0	0	2	4	1	7	7	23	0	15	1	27	83	14	1	3	2	5	2	0
AL139156.3	0	0	0	0	0	0	0	0	0	0	0	0	0	0	0	0	0	0	0	0	0	0	0	0	0	0	0	0	0	0	0	0	0	0	1	0	0	0	0	0	0	0	0	0	0	0	0	0	0
DNAJC19P7	0	0	0	0	0	0	0	0	0	0	0	0	0	0	0	0	0	0	0	0	0	0	0	0	0	0	0	0	0	0	0	0	0	0	0	0	0	0	0	0	0	0	0	0	0	0	0	0	1
ANAPC10P1	2	9	0	0	0	2	14	17	0	0	52	0	20	4	0	35	0	11	36	1	0	3	0	7	0	1	2	1	1	2	0	4	3	1	0	5	4	0	0	9	4	21	13	5	1	0	4	2	1
CC2D1B	73	485	204	264	758	164	376	852	630	159	171	101	837	369	185	627	481	390	445	505	20	373	329	315	439	484	868	322	808	503	620	644	443	474	186	633	306	240	1563	167	932	142	526	180	189	114	101	266	116
AL513218.1	0	2	0	0	0	0	0	1	0	0	0	0	1	2	0	2	1	1	2	0	0	0	0	0	0	0	1	3	0	3	0	5	5	0	0	0	0	2	0	2	1	1	0	0	2	1	0	1	1
AL513218.2	0	0	0	0	0	0	0	0	0	0	0	0	0	0	0	0	0	0	0	5	0	0	1	1	2	1	3	1	2	1	3	2	0	0	7	2	0	0	0	0	0	0	0	1	1	2	5	0	2
PLA2G12AP1	4	5	0	1	0	0	7	0	0	2	0	2	10	0	0	12	5	12	1	2	0	0	0	0	2	2	1	0	0	2	2	1	1	2	0	1	1	2	0	6	0	22	6	1	1	0	4	0	0
ORC1	19	68	0	0	25	35	112	122	59	390	289	72	67	335	98	309	105	72	1612	33	0	5	3	14	24	3	23	12	4	35	19	10	4	24	12	17	26	18	34	106	19	428	46	15	27	11	14	9	1
PRPF38A	234	828	296	335	655	128	979	782	215	125	841	129	933	440	228	896	777	548	1404	346	7	207	111	250	576	403	648	296	535	460	499	858	799	726	314	269	354	300	1046	269	761	286	716	270	202	149	198	217	202
TUT4	1998	3146	1738	1589	3606	808	5841	2586	1657	890	4556	471	7792	879	2501	7360	3358	4323	6741	783	18	1169	351	1401	1735	871	1589	905	1346	1543	1151	1695	1530	1879	591	1164	1235	681	2217	277	1948	807	2285	1045	926	456	685	685	603
AL591167.1	0	0	0	0	0	0	0	0	0	0	0	0	0	0	0	0	0	0	0	2	0	1	0	3	0	0	0	2	1	1	0	3	1	0	0	3	0	0	0	0	0	0	0	4	4	2	0	1	1
EEF1GP7	0	0	0	0	0	0	0	1	0	0	0	0	0	0	0	4	0	1	2	0	0	0	0	0	0	0	0	0	0	1	0	2	2	0	4	1	0	0	0	0	0	7	0	0	0	0	1	0	1
GPX7	5	33	0	2	36	0	59	46	0	0	0	1	64	31	0	191	26	32	113	78	2	51	9	56	265	100	285	66	341	335	117	216	199	175	29	48	5	36	50	7	32	11	81	42	41	56	36	51	28
SHISAL2A	0	3	0	0	30	0	25	11	0	0	0	0	4	4	0	2	1	28	20	4	2	102	1	12	4	7	4	13	9	57	2	9	1	2	9	9	7	0	0	4	0	15	2	1	1	0	8	2	0
COA7	20	68	11	26	11	10	101	36	14	5	177	34	51	33	1	147	43	62	285	136	10	20	23	58	322	129	364	136	364	313	279	284	300	217	117	80	13	20	15	12	16	26	185	108	73	61	49	122	84
NDUFS5P3	0	0	0	0	0	0	0	1	0	0	0	0	0	0	0	0	0	0	0	0	1	0	0	0	0	0	0	2	0	1	0	0	0	0	1	0	0	0	1	0	0	1	0	0	0	0	0	0	0
RN7SL62P	0	0	0	0	0	0	0	0	0	0	0	0	0	0	0	0	0	0	0	0	0	0	1	0	0	0	0	0	0	0	1	0	0	0	0	0	0	0	0	0	0	0	0	0	0	0	0	0	0
ZYG11B	228	696	275	323	268	218	898	272	126	111	566	29	724	105	793	1101	739	522	664	908	28	235	121	372	1884	1009	2264	743	1588	1603	1770	1691	1960	1417	446	502	45	209	47	58	122	213	672	696	762	395	437	910	542
RNU2-30P	0	0	0	0	0	0	0	0	0	0	0	0	0	1	0	0	0	0	0	0	0	0	0	0	0	0	0	0	1	1	0	0	1	0	0	2	0	0	0	0	0	0	0	0	0	1	1	1	0
RPS13P2	6	8	3	0	1	1	26	2	2	1	7	0	4	5	6	12	5	18	10	7	2	5	2	1	84	44	81	29	109	78	69	65	31	51	10	3	0	3	0	11	0	7	9	5	5	6	0	5	5
RNU6-969P	0	0	0	0	0	0	0	0	0	0	0	0	0	0	0	0	0	0	0	0	1	0	0	0	0	0	0	0	0	0	0	0	0	0	0	0	0	0	0	0	0	2	0	0	0	0	0	0	0
ZYG11A	2	3	0	27	0	25	4	0	0	114	0	0	5	2	0	78	3	5	5	32	1	3	6	32	138	31	143	38	240	168	51	87	87	94	40	19	16	0	0	37	0	103	1	9	209	0	167	116	29
AC099677.3	0	0	0	0	0	0	0	0	0	0	0	0	0	0	0	0	0	0	0	0	0	0	0	0	0	0	0	0	0	0	0	0	0	0	2	0	0	0	0	0	0	1	0	0	1	0	1	1	1
ECHDC2	404	1649	923	881	2803	615	845	3939	1017	34	271	28	1759	383	236	479	2667	269	230	518	11	224	268	617	617	411	827	503	1472	793	398	1137	1006	578	188	1055	756	423	1199	42	883	200	1141	419	824	367	609	754	456
AC099677.1	1	0	0	0	0	0	0	0	1	0	0	0	0	0	0	0	0	0	0	0	0	0	0	0	0	0	0	0	0	1	0	0	0	1	1	2	0	2	0	2	0	8	0	0	0	2	0	0	0
AC099677.2	0	0	0	0	0	0	0	0	0	0	0	0	0	0	0	1	0	0	0	0	0	0	0	2	0	1	1	0	0	3	0	0	0	1	0	1	0	0	0	0	0	1	0	2	3	0	6	1	2
SCP2	963	2924	1137	2470	1850	518	3178	1905	1079	472	3805	268	3926	627	1278	3725	2209	899	1675	960	27	185	95	353	2408	1069	2598	850	2096	2373	2296	1836	1644	1678	487	379	164	1284	119	303	271	707	3956	589	650	306	521	1246	312
AC099677.4	0	0	1	0	0	0	0	0	2	0	0	0	0	0	0	0	0	0	0	0	0	0	2	0	0	0	0	0	0	2	0	1	0	0	1	2	0	0	0	0	0	0	0	1	1	0	1	0	0
AC099677.6	0	0	0	0	0	0	0	1	0	0	0	0	0	1	0	0	0	0	0	0	0	0	0	0	0	0	0	0	0	0	0	0	0	0	0	0	0	0	0	0	0	0	0	0	0	0	0	0	0
AC099677.5	0	0	0	0	0	0	0	0	0	0	0	0	0	0	0	1	0	0	0	0	0	0	0	0	0	0	0	0	0	0	0	0	2	0	0	1	0	0	0	0	0	0	0	0	1	0	0	1	0
H3P2	0	0	0	0	0	0	0	0	0	0	0	0	0	0	0	0	0	0	0	0	0	0	0	0	0	0	0	0	0	0	0	0	0	0	0	0	0	0	0	0	0	0	0	0	0	0	0	0	0
RRAS2P1	17	10	2	4	3	0	14	3	0	0	96	1	3	0	11	6	14	6	17	0	0	0	0	2	1	0	0	1	2	0	0	0	2	0	0	0	1	0	7	14	0	56	2	0	0	0	0	0	0
TUBBP10	0	0	0	0	0	0	0	0	0	0	0	0	0	0	0	0	0	1	0	0	0	0	0	0	0	0	0	0	0	0	0	0	0	0	0	0	0	0	0	0	0	0	0	1	2	0	0	0	0
PODN	32	839	63	38	506	25	794	558	83	164	162	6	66	277	36	111	552	103	169	357	4	9	17	91	62	1788	188	2076	66	1017	5	1643	258	226	134	23	21	32	102	18	64	50	346	3	10	3	51	42	61
AL445183.1	0	0	0	0	0	0	0	0	0	0	0	0	0	1	0	0	0	0	0	0	0	0	0	0	0	0	0	0	0	0	0	0	0	0	0	0	0	0	0	3	0	2	0	0	0	0	0	0	0
HIGD1AP11	0	0	0	0	0	0	0	0	0	0	0	0	0	0	0	0	0	0	0	0	0	0	0	0	0	0	0	0	0	0	0	0	0	0	0	0	0	0	0	0	0	0	0	0	0	0	0	0	0
SLC1A7	0	5	1	0	0	0	8	4	0	0	0	0	1	16	0	0	3	0	2	0	0	0	0	0	0	13	2	17	2	6	0	8	1	1	5	0	1	2	3	23	1	50	9	0	0	0	1	1	2
AL445183.2	0	1	0	0	0	0	1	1	0	0	0	0	0	3	0	0	0	0	1	1	0	0	0	0	0	2	0	0	1	5	0	1	0	1	7	0	0	0	0	5	0	5	2	0	0	0	1	0	0
AL606760.4	0	0	0	0	0	0	0	0	0	0	0	0	0	0	0	0	0	0	0	0	0	0	0	0	0	0	0	0	0	0	0	0	0	0	0	0	0	0	0	0	0	2	0	0	0	0	0	0	1
CPT2	142	642	73	331	274	101	804	366	154	26	350	81	969	114	121	703	366	439	522	250	13	64	25	152	434	231	545	189	568	231	495	347	262	301	75	216	46	338	86	61	156	276	1089	126	124	73	83	166	88
AL606760.2	10	27	0	9	7	9	54	25	0	10	57	6	60	11	0	27	19	39	19	5	0	6	4	6	3	2	5	2	6	6	6	5	10	3	5	14	13	1	12	25	29	98	12	12	7	3	6	9	0
CZIB	72	251	142	131	240	42	243	171	95	90	127	29	275	66	160	259	267	193	327	279	4	83	44	138	406	343	487	242	548	300	418	542	389	294	115	268	15	91	113	29	188	81	313	140	119	65	71	188	100
AL606760.3	0	0	0	0	0	0	0	0	0	0	0	0	0	1	0	0	0	0	0	3	0	2	1	1	3	1	3	2	1	1	2	1	5	4	5	3	0	0	0	0	0	0	0	0	0	0	0	2	0
MAGOH	231	513	243	268	167	99	859	223	131	200	561	123	628	236	713	1439	313	430	1404	120	3	55	22	65	260	121	408	76	239	236	207	214	236	273	110	101	38	312	45	70	136	127	1342	74	54	29	44	68	44
AL606760.1	0	0	0	0	0	0	0	0	0	0	0	0	1	0	0	0	0	0	0	19	0	1	4	15	59	12	46	6	28	12	43	21	28	28	6	18	0	0	0	0	0	0	0	12	4	3	2	9	8
LRP8	35	428	0	134	147	4	109	518	204	296	482	253	249	164	89	589	730	144	2864	164	9	170	32	187	1616	330	686	182	1909	259	1545	2234	2946	622	61	358	54	53	78	77	34	272	93	184	124	73	122	481	298
AL355483.3	0	0	0	0	0	0	0	0	0	0	0	0	0	0	0	0	0	0	0	0	0	0	0	0	0	0	1	1	0	0	0	0	0	1	2	0	0	0	0	0	0	0	0	0	0	0	1	0	0
AL355483.1	0	4	0	0	0	0	0	0	0	0	0	0	0	0	0	0	6	0	5	0	0	0	0	0	0	0	0	0	0	0	1	2	0	0	3	0	0	0	0	2	0	2	0	0	0	0	0	0	0
AL355483.2	0	0	0	0	0	0	0	0	0	0	0	0	0	0	0	0	0	0	0	0	0	0	0	0	0	0	0	0	0	0	0	0	0	0	0	0	0	0	0	0	0	0	0	0	0	0	0	0	0
LINC01771	0	0	0	0	0	0	0	0	0	0	0	0	0	0	0	0	0	0	0	0	0	2	0	3	0	2	4	2	0	0	3	3	1	0	0	2	0	0	0	0	0	0	0	0	0	1	0	1	0
AC119428.2	0	0	0	0	0	0	0	0	0	0	0	0	0	0	0	0	0	0	0	0	0	0	0	0	0	0	0	0	0	0	0	0	0	0	1	0	0	0	0	0	0	0	0	0	0	0	0	0	0
AC119428.1	0	0	0	0	0	0	0	0	0	0	0	0	0	0	0	0	0	0	0	0	0	0	0	0	0	0	0	0	0	0	0	0	0	0	0	0	0	0	0	0	0	0	0	0	0	0	0	0	0
LINC02812	0	0	0	0	0	0	1	0	0	0	0	0	0	0	0	0	0	0	0	0	1	6	0	0	0	1	0	2	0	0	0	1	0	0	3	0	0	0	0	0	0	0	0	0	0	0	0	0	0
SLC25A3P1	0	0	0	0	0	0	0	0	0	0	0	0	0	0	0	0	0	0	0	2	0	0	1	0	0	1	1	0	0	1	7	9	6	3	3	1	0	0	0	0	0	0	0	0	0	0	1	0	0
AL365445.1	0	0	0	0	0	0	0	0	0	0	0	0	0	0	0	0	0	0	0	0	0	0	0	0	0	0	0	0	0	0	0	0	0	0	0	0	0	0	0	0	0	0	0	0	0	0	0	0	0
DMRTB1	0	0	0	0	0	0	0	2	0	0	0	0	0	0	0	0	0	2	0	2	2	0	0	0	1	0	0	0	1	0	12	6	1	0	1	0	0	0	0	9	0	11	0	0	0	0	0	0	0
GLIS1	0	2	0	0	0	0	3	2	0	0	0	0	0	3	0	2	2	0	9	5	0	5	1	0	3	13	36	4	12	1	7	11	3	2	3	1	2	0	0	4	1	7	1	0	0	8	0	0	1
RNU7-95P	0	0	0	0	0	0	0	0	0	0	0	0	0	0	0	0	0	0	0	0	0	0	0	0	0	0	0	0	0	0	0	0	0	0	0	0	0	0	0	0	0	0	0	0	0	1	0	0	0
NDC1	107	238	43	72	55	84	546	43	60	186	527	72	244	61	1	1827	187	303	1190	171	5	109	19	78	486	233	434	178	274	448	496	326	394	383	122	75	2	35	2	39	15	106	93	203	213	83	142	212	113
AL049745.1	12	1	1	7	0	2	2	1	0	0	0	0	3	0	2	0	4	0	0	0	0	0	0	0	0	0	0	0	0	0	0	0	0	0	2	0	2	7	1	0	79	0	3	0	0	0	1	2	0
AL049745.2	0	0	0	0	0	0	0	0	0	0	0	0	0	0	0	0	0	0	0	0	0	0	0	0	0	0	0	0	1	0	0	0	0	0	1	0	0	0	0	1	0	2	0	0	0	0	0	0	0
YIPF1	59	194	73	173	104	48	284	81	3	89	266	23	373	69	20	418	230	153	200	371	10	39	33	92	817	271	817	164	671	681	698	514	500	498	90	237	2	54	14	34	19	84	78	249	208	123	122	315	93
DIO1	2	1	0	124	68	0	0	28	2	0	430	0	0	0	0	0	0	0	0	569	7	0	23	201	3555	369	1301	16	5334	632	3027	2140	1915	889	60	795	4	0	0	9	0	194	69	212	421	334	139	407	170
HSPB11	90	237	52	309	157	105	430	179	31	67	256	86	608	110	134	676	273	294	361	124	5	71	26	114	529	165	423	126	341	397	385	473	455	395	116	177	7	79	30	26	95	143	285	187	188	104	208	152	109
LRRC42	71	290	49	137	446	511	295	340	85	147	1033	42	2381	94	137	674	246	115	353	433	4	16	76	213	594	276	1388	314	451	1096	871	297	218	468	123	494	17	146	149	36	292	179	351	184	245	124	141	209	89
HNRNPA3P12	3	1	0	0	0	9	7	2	0	0	1	4	3	3	0	12	5	7	10	0	3	0	3	2	0	1	1	5	2	3	1	1	0	0	8	4	1	0	10	37	1	107	3	0	0	0	1	0	1
LDLRAD1	10	1	0	0	10	6	1	42	0	0	282	0	1	1	0	28	7	0	2	255	0	0	6	44	156	170	169	92	5	75	438	0	2	35	12	176	5	7	0	7	1	12	18	34	25	41	86	14	11
TMEM59	1891	2796	3193	1880	1537	553	3555	1820	551	499	12596	242	6241	529	2300	3032	1896	1511	1162	6382	34	162	320	1926	11664	5306	26161	2097	3707	15708	21779	3548	3016	7231	1071	1976	23	4004	126	445	668	1201	5910	4190	3278	2752	1147	5205	1608
AL353898.3	0	1	2	1	1	0	4	2	1	8	0	0	1	2	0	7	0	0	1	14	0	23	7	15	6	4	6	7	1	20	7	10	12	8	4	54	0	0	0	0	0	0	0	21	20	14	15	17	13
TCEANC2	1	22	0	7	13	10	52	27	8	5	22	7	20	21	17	86	26	29	31	144	8	113	26	117	252	150	184	132	208	155	245	234	276	169	62	136	7	18	15	4	15	11	21	94	65	73	102	97	73
MIR4781	0	0	0	0	0	0	0	0	0	0	0	0	0	0	0	0	0	0	0	0	0	0	0	0	0	0	0	0	0	0	0	0	0	0	1	0	0	0	0	0	0	0	0	0	0	0	0	0	0
AL353898.1	0	1	0	0	0	0	0	0	0	0	19	0	0	0	34	2	1	2	1	0	0	0	0	0	0	0	0	0	0	0	0	0	1	1	0	0	0	0	0	0	0	3	0	0	0	3	3	0	1
AL353898.2	0	0	0	0	0	0	0	0	0	0	0	0	0	0	0	0	0	0	0	0	0	0	0	0	0	0	0	0	0	0	0	0	0	0	1	0	0	0	0	0	0	0	0	0	0	0	0	0	0
AL357673.1	0	0	0	0	0	0	0	0	0	0	0	0	0	0	0	0	0	0	0	0	0	0	0	0	0	2	1	2	0	1	0	2	0	0	1	3	0	0	0	0	0	0	0	1	0	0	0	0	0
CDCP2	0	0	0	0	0	0	0	0	0	0	0	0	1	0	0	0	0	0	0	0	0	0	0	0	0	1	0	2	0	0	0	0	0	0	2	0	0	0	0	0	0	0	0	0	0	0	1	1	1
AL357673.2	0	0	0	0	0	0	0	0	0	0	0	0	0	0	0	0	0	0	1	0	4	0	0	0	0	0	0	0	0	0	0	0	0	2	10	0	0	0	2	2	0	20	0	0	0	0	0	0	3
CYB5RL	62	124	37	86	79	9	156	176	0	99	123	32	183	80	0	141	90	131	129	64	3	24	9	57	79	98	125	113	83	62	138	108	76	84	17	118	10	21	2	18	26	72	82	66	40	52	30	52	32
MRPL37	83	342	153	196	139	192	408	174	79	189	317	64	300	115	120	626	280	204	912	229	3	55	45	60	292	228	393	160	606	283	434	471	316	278	81	132	44	147	83	51	125	91	426	50	77	45	73	98	34
SSBP3	492	1801	225	461	1469	337	2086	2083	918	444	1208	179	1962	339	514	2494	2336	1401	1873	431	4	85	66	223	282	405	448	198	151	255	571	473	287	322	206	299	58	561	213	99	440	189	1713	108	87	108	156	84	107
SSBP3-AS1	0	1	0	0	0	0	2	0	0	0	0	0	6	0	0	4	2	0	4	6	0	3	0	4	0	1	1	1	0	1	1	0	0	5	3	6	0	2	0	0	0	6	0	1	1	1	4	1	1
AL161644.1	0	0	0	0	0	0	0	0	0	0	0	0	0	0	0	0	0	0	0	2	0	3	0	0	0	0	0	0	0	0	0	1	0	0	3	0	0	0	0	0	0	0	0	0	0	0	0	0	0
AL035415.1	0	0	0	0	0	0	0	0	0	0	0	0	0	0	0	0	0	0	0	0	0	0	0	0	0	0	0	0	0	0	0	0	0	0	0	0	0	0	0	0	0	0	0	0	0	0	0	0	0
AC099796.2	0	0	0	0	0	0	0	0	0	0	0	0	0	0	0	0	1	0	0	0	0	0	0	0	0	0	0	1	0	0	1	0	0	0	4	1	0	0	0	0	0	0	0	0	0	0	0	0	0
LINC02784	0	0	0	0	0	0	0	0	0	0	0	0	0	0	0	0	0	0	0	0	1	0	0	0	0	0	0	1	0	0	0	0	0	1	1	0	0	0	0	0	0	0	0	0	0	0	0	0	0
AC099796.1	0	0	0	0	0	0	0	0	0	0	0	0	0	7	0	1	0	0	0	0	0	0	0	0	0	0	0	0	0	0	0	0	0	0	0	0	0	0	0	0	0	0	0	0	0	0	0	0	0
HNRNPA1P63	0	2	0	0	0	0	1	0	0	0	0	0	1	3	0	0	0	0	1	0	0	0	0	0	0	0	0	0	0	1	0	0	0	1	1	0	9	0	5	63	0	74	0	0	0	0	1	0	0
ACOT11	89	643	187	36	566	92	129	848	409	80	56	45	678	157	58	535	661	80	71	605	29	25	628	627	245	192	1107	316	1104	302	326	694	677	599	152	2476	96	375	856	51	1002	143	464	568	1130	284	201	524	300
FAM151A	0	6	0	15	0	0	0	0	0	0	0	0	0	0	0	0	35	4	1	0	0	21	0	0	0	0	0	0	0	1	0	0	0	1	4	0	6	0	1	5	0	14	0	0	0	0	0	0	0
AL590093.1	0	0	0	0	0	0	0	0	0	0	0	0	0	0	0	0	0	0	0	0	0	0	0	0	0	0	0	0	0	0	0	0	0	0	0	0	0	0	0	0	0	0	0	0	0	0	0	0	0
MROH7	31	73	1	4	38	7	12	65	8	28	59	4	110	1	1	70	56	1	4	30	4	2	20	57	22	9	65	34	77	23	13	50	52	55	29	384	2	4	0	1	9	9	10	57	133	43	26	44	87
MROH7-TTC4	17	55	81	0	72	16	9	94	0	0	73	5	62	0	0	52	55	5	4	4	0	0	0	1	0	0	1	0	0	0	0	0	1	4	0	2	0	0	0	0	1	13	1	8	16	4	2	6	2
TTC4	1	16	0	0	5	0	15	13	0	0	4	0	14	3	1	14	3	7	20	6	2	4	3	8	8	4	14	8	10	5	17	11	8	3	4	24	4	17	30	2	12	8	64	18	15	7	11	12	4
PARS2	5	16	0	0	9	2	27	25	29	9	0	3	47	1	0	44	25	23	41	40	1	10	5	32	84	40	64	48	104	53	125	88	66	36	13	47	1	7	0	2	3	24	36	31	20	19	19	28	12
TTC22	18	140	3	32	261	23	62	248	194	6	25	10	103	36	0	25	161	12	15	156	0	39	60	126	190	108	241	166	210	89	300	77	126	152	31	218	23	127	110	12	132	17	132	53	67	52	6	58	45
AC096536.1	0	0	0	0	0	0	0	0	0	0	0	0	0	0	0	0	0	0	0	0	0	0	0	0	0	0	0	0	0	0	0	0	0	0	0	0	0	0	0	0	0	0	0	0	0	0	0	0	0
LEXM	2	13	25	0	11	21	8	9	18	0	16	1	16	0	0	3	29	2	0	2	0	0	10	11	2	8	6	4	0	2	0	0	1	4	2	8	3	9	32	22	20	45	16	2	3	5	0	1	1
DHCR24	599	232	0	509	216	127	586	145	109	820	407	390	1000	280	46	10737	157	403	1457	542	1	37	33	154	553	466	1125	276	550	1240	370	285	339	474	106	194	15	8	47	38	53	184	95	54	323	50	177	639	136
AC096536.3	0	0	0	0	0	0	0	0	0	0	0	0	0	2	0	25	3	0	3	0	0	0	0	0	1	0	0	0	0	0	0	0	0	0	0	1	3	0	0	20	2	49	0	0	0	0	0	0	0
AC096536.2	3	2	0	0	0	0	4	0	0	0	0	0	11	0	0	27	0	0	1	0	0	0	1	0	1	0	2	0	0	0	0	0	0	2	0	0	0	0	0	0	0	0	0	0	0	0	0	0	0
DHCR24-DT	0	0	0	0	0	0	0	0	0	0	0	0	0	0	0	0	0	0	0	0	1	0	0	1	1	1	2	1	0	3	0	0	2	1	0	1	0	0	0	0	0	0	0	0	0	1	1	2	0
AL590440.2	0	0	0	0	0	0	1	0	0	1	0	0	0	0	0	0	0	0	0	0	0	0	0	1	1	2	0	0	0	0	2	0	1	2	0	3	0	0	0	0	0	0	0	0	0	0	0	0	0
TMEM61	0	91	25	9	32	32	31	44	82	0	108	0	199	5	0	3	72	36	0	104	3	0	14	99	78	76	69	1	7	220	276	2	1	40	8	147	0	72	45	11	21	11	205	8	18	3	18	20	8
AL590440.1	0	1	0	0	0	0	0	0	0	0	0	0	2	0	0	0	2	0	0	0	0	0	0	0	0	0	0	0	0	0	0	1	0	0	0	0	0	0	0	4	1	10	0	0	0	0	0	0	0
BSND	0	2	0	0	6	0	28	2	0	0	0	0	13	0	0	4	0	36	2	0	4	1	0	7	1	0	1	1	0	4	1	1	0	4	16	0	6	0	2	16	0	44	0	0	1	0	5	0	0
PCSK9	1	26	0	11	2	52	17	6	0	0	224	91	0	10	0	2	1	10	2518	0	0	0	1	0	0	3	0	0	0	1	0	1	1	2	2	1	8	2	7	22	6	83	14	0	0	0	0	0	0
USP24	1619	3907	1060	1105	3449	1396	6352	2808	1371	813	4698	770	8375	775	1799	8633	3671	5185	7339	1435	15	1450	393	1271	1727	1216	2257	1631	1486	1676	2099	1654	1451	1681	661	1823	536	676	985	213	1645	802	2331	1309	1359	812	805	1277	569
MIR4422HG	0	0	0	0	0	0	0	0	0	0	0	0	0	0	0	0	0	0	1	2	1	1	0	0	0	0	0	0	0	0	1	2	0	0	4	0	0	0	0	0	0	0	0	0	0	0	0	0	0
GYG1P3	0	1	0	0	0	3	1	0	0	0	0	0	1	3	0	4	0	0	0	0	0	1	0	0	3	0	2	0	0	0	0	0	1	3	0	0	2	0	1	4	0	18	1	0	0	1	2	0	0
MIR4422	0	0	0	0	0	0	0	0	0	0	0	0	0	0	0	0	0	0	0	0	0	0	0	0	0	0	0	0	0	0	0	0	0	0	0	0	0	0	0	0	0	0	0	0	0	0	0	0	0
AL603840.1	0	0	0	0	0	0	0	0	0	0	0	0	0	0	0	0	0	0	0	0	5	0	2	19	40	13	1	2	6	2	3	33	44	40	15	9	0	1	0	1	0	6	0	0	0	0	3	5	25
GOT2P1	0	0	0	0	0	0	0	0	0	0	0	0	0	0	0	0	0	0	0	0	0	1	0	0	0	0	0	0	0	0	0	0	0	0	1	1	0	2	0	1	1	4	0	0	0	0	0	0	0
MTCO2P34	0	0	0	0	0	0	0	0	0	0	0	0	0	0	0	0	0	0	0	0	0	0	0	0	0	0	0	0	0	0	0	0	0	0	0	1	0	0	0	0	0	0	0	0	0	0	0	0	0
RN7SKP291	0	0	0	0	0	0	0	0	0	0	0	0	0	0	0	0	0	0	0	0	0	0	0	1	36	22	10	7	42	26	50	24	43	29	4	3	0	0	0	0	0	0	0	0	0	0	0	1	0
RNU6-830P	0	0	0	0	0	0	0	0	0	0	0	0	0	0	0	0	0	0	0	0	1	0	0	0	0	0	0	0	0	0	0	0	0	0	0	0	0	0	0	0	0	0	0	0	0	0	0	0	0
AL109742.1	0	0	0	0	0	0	0	0	0	0	0	0	0	0	0	0	0	0	0	0	0	0	0	0	0	0	0	0	0	0	0	0	0	0	0	0	0	0	0	0	0	0	0	0	0	0	0	0	0
LINC01755	0	0	0	0	0	0	0	0	0	0	0	0	0	0	0	0	0	0	0	0	1	0	0	11	10	2	0	0	0	0	0	19	31	22	8	0	0	0	0	0	0	0	0	0	0	0	0	9	14
LINC01753	0	0	0	0	0	0	0	0	0	0	0	0	0	0	0	0	0	0	0	0	0	0	0	0	0	0	0	0	0	0	0	0	1	1	0	0	0	0	0	0	0	0	0	0	0	0	0	1	2
PIGQP1	0	0	0	0	0	0	0	0	0	0	0	0	0	0	0	0	0	0	0	0	0	0	0	0	0	0	0	0	0	0	0	0	0	0	0	0	0	0	0	0	0	0	0	0	0	0	0	0	0
AL353681.1	0	0	0	0	0	0	0	0	0	0	0	0	0	0	0	0	0	0	0	0	1	0	0	0	0	0	0	0	0	0	0	2	0	0	2	0	0	0	0	0	0	0	0	0	0	0	0	0	0
AC119674.1	0	0	0	0	0	0	0	0	0	0	0	0	0	1	0	2	0	0	0	11	4	2	4	10	5	9	3	6	4	6	2	20	21	6	21	9	0	0	0	0	0	0	0	7	6	3	11	11	10
AC119674.2	0	0	0	0	0	0	0	0	0	0	0	0	0	0	0	0	0	0	0	2	1	0	9	4	2	10	3	1	5	3	1	9	6	3	9	4	0	0	1	0	0	0	0	0	1	1	3	3	1
RPSAP20	0	0	0	0	0	0	2	0	0	0	0	0	0	0	0	6	0	1	2	0	1	2	0	0	0	3	0	0	0	1	0	1	0	1	2	0	0	0	0	0	0	6	0	0	0	0	0	2	0
LINC01767	0	0	0	0	0	0	0	0	0	0	0	0	0	0	0	0	0	0	0	4	0	1	1	0	0	4	0	1	0	2	1	0	0	7	3	1	0	0	0	0	0	0	0	0	0	0	0	2	0
PLPP3	39	87	132	85	49	54	171	25	3	61	4	3	117	24	0	232	66	43	117	1456	4	30	148	467	3481	3889	981	1022	6830	1795	2322	8055	8621	2382	903	371	65	54	73	14	65	82	212	234	96	64	95	627	516
RPL21P23	0	0	0	0	0	0	0	0	0	0	0	0	0	0	0	0	0	0	0	0	0	0	0	0	0	0	0	0	0	1	0	1	0	0	1	0	0	0	0	1	0	1	0	0	0	0	0	0	0
RPL23AP85	0	0	0	0	0	0	0	0	0	0	0	0	0	0	0	0	0	0	0	0	0	0	0	0	0	0	0	0	0	0	0	0	0	0	0	0	2	0	0	0	0	1	0	0	0	0	0	0	0
AC099789.1	0	0	0	0	0	0	0	0	0	0	0	0	0	0	0	0	0	0	0	0	0	0	0	0	0	0	0	0	0	0	0	0	0	0	0	0	0	0	0	0	0	0	0	0	1	1	0	0	2
PRKAA2	278	613	8	114	260	65	246	190	68	93	182	0	182	85	134	495	343	21	561	152	9	4	34	148	406	246	246	455	430	201	241	731	722	458	109	173	41	33	121	39	175	142	183	259	223	48	264	186	201
FYB2	154	43	299	49	44	113	170	82	68	10	154	0	10	78	0	9	35	2	13	209	2	0	76	890	32	100	48	31	19	462	56	32	23	130	43	229	129	524	195	129	207	107	591	8	57	3	143	130	53
AL360295.1	0	0	0	0	0	0	0	0	0	0	0	0	0	0	0	0	0	0	0	0	1	0	0	0	0	0	0	0	0	0	0	1	0	0	0	0	0	0	0	0	0	0	0	0	0	0	0	0	0
C8A	16	508	0	1151	588	50	2	606	55	0	2	0	43	1	335	0	224	0	0	0	0	0	0	0	0	0	0	0	0	1	0	0	0	2	9	0	15	0	2	88	1	334	38	0	0	0	0	0	0
C8B	19	198	106	897	150	19	5	448	17	0	101	0	0	0	0	5	55	0	0	0	0	0	0	0	1	0	0	0	0	0	0	0	1	3	5	0	25	230	1	125	0	312	84	0	0	0	2	0	4
AL161740.1	0	0	0	0	0	0	0	0	0	0	0	0	0	0	0	0	0	0	0	0	0	0	0	0	0	0	1	0	0	0	0	0	0	1	3	1	0	0	0	0	0	0	0	0	0	0	0	0	0
DAB1	67	539	0	353	215	32	36	391	386	0	217	0	4	18	220	2262	882	19	10	14	5	9	11	154	452	212	942	83	3	6	850	65	3	10	23	458	2	3	132	6	209	101	180	4	8	65	55	14	64
AL390243.1	0	0	0	0	0	0	0	0	0	0	0	0	0	0	0	0	0	0	0	0	0	0	0	0	0	0	0	0	0	0	0	0	0	0	2	0	0	0	0	0	0	0	0	0	0	0	0	0	0
RPS20P5	0	23	0	1	24	0	3	27	6	0	0	0	0	0	8	1	18	2	0	0	0	0	0	1	0	0	0	0	0	0	0	1	1	0	0	0	0	0	0	1	0	5	0	0	0	1	0	1	0
DAB1-AS1	0	0	0	0	0	0	0	0	0	0	0	0	0	0	0	0	0	0	0	0	2	0	0	1	0	0	0	1	0	1	0	0	0	0	6	0	0	0	0	0	0	0	0	0	0	0	0	0	1
HNRNPA1P6	55	906	0	384	413	1	27	1984	575	0	30	1	2	7	373	46	911	38	17	2	3	3	0	3	2	0	2	3	2	2	0	0	1	1	5	0	6	3	6	34	13	189	44	1	2	0	1	2	1
RPS26P15	4	105	0	51	29	4	39	150	14	0	20	0	2	4	60	21	68	15	3	0	0	0	0	0	0	0	0	1	0	0	0	4	0	1	1	0	5	0	0	1	0	15	11	0	0	0	0	0	1
AL445193.2	0	0	0	0	0	0	0	0	0	0	0	0	0	0	0	0	0	0	0	0	1	0	0	0	0	0	0	0	0	0	0	0	0	2	3	0	0	0	0	0	0	0	0	0	0	0	0	0	0
AL445193.1	0	0	0	0	0	0	0	0	0	0	0	0	0	0	0	0	0	0	0	0	0	0	0	0	0	0	0	0	0	0	0	0	0	0	0	0	0	0	0	0	0	0	0	0	0	0	0	0	0
AL357373.1	3	33	0	5	10	0	5	58	123	0	0	0	0	1	6	8	28	1	0	4	0	0	0	1	0	0	0	0	0	1	0	0	0	0	0	4	0	0	0	1	0	4	2	0	1	1	4	2	6
OMA1	311	707	79	232	780	128	2805	333	329	171	3323	106	555	107	1166	1636	893	1556	638	110	6	195	15	172	551	280	367	159	584	236	322	632	719	406	99	175	39	137	33	70	145	168	457	172	134	98	117	170	144
AL035411.3	0	0	0	0	0	0	0	0	0	0	0	0	0	0	0	0	0	0	0	0	0	0	1	0	0	1	0	0	1	1	0	1	2	1	3	0	0	0	0	0	0	0	0	0	1	0	0	0	0
AL035411.2	0	0	0	0	0	0	0	0	0	0	0	0	0	0	0	0	0	0	0	0	0	0	0	0	1	0	0	1	0	0	0	0	0	0	2	0	0	0	0	0	0	0	0	0	0	0	0	0	1
RN7SL713P	0	0	0	0	0	0	0	0	0	0	0	0	0	0	0	0	0	0	0	0	0	1	4	1	5	1	4	11	0	10	7	3	1	2	0	4	0	0	0	0	0	0	0	0	0	0	0	0	0
TACSTD2	23	3	2	15	10	0	40	3	0	9	0	0	0	86	0	30	5	3	5	33	0	4	2	19	61	187	57	20	71	38	40	51	43	274	14	4	10	0	12	1	1	0	2	0	0	1	2	11	5
AL035411.1	0	5	11	0	3	1	14	11	3	3	0	2	18	7	2	23	2	19	27	5	0	2	1	1	3	3	4	0	8	2	2	8	4	4	3	2	11	3	17	12	8	31	7	0	2	1	0	2	1
MYSM1	416	1012	396	435	1294	178	1451	936	381	111	912	188	1645	352	1219	1383	1096	1127	1890	675	19	651	185	686	678	544	710	837	351	749	601	1118	664	1047	398	949	331	256	402	76	647	262	613	678	683	303	553	614	481
AL136985.3	0	0	0	0	0	0	1	0	0	0	0	0	0	0	0	0	0	0	0	2	0	1	5	11	1	0	0	4	1	7	4	6	0	4	5	2	0	0	0	0	0	0	0	1	6	3	1	4	2
JUN	133	607	631	860	1113	67	1291	337	245	712	266	47	400	998	154	289	335	898	1690	3360	90	356	1220	2642	5404	6578	2020	3035	8661	3390	4542	7769	1500	3493	976	2071	4380	229	4620	659	2625	422	516	135	172	46	85	294	409
LINC01135	4	12	0	0	38	1	14	11	0	0	0	3	20	1	16	10	22	18	4	17	0	7	3	20	90	25	28	26	103	7	35	48	115	47	13	22	5	1	2	7	0	6	10	18	20	11	3	13	15
AL136985.2	0	0	0	0	0	0	0	0	0	0	0	0	0	0	0	0	0	0	0	0	2	0	0	0	1	0	1	0	0	0	3	0	1	1	1	1	0	0	0	0	0	0	0	0	0	0	0	0	0
AL136985.1	0	0	0	0	0	0	0	0	0	0	0	0	0	0	0	0	0	0	0	0	0	0	0	0	0	0	0	0	0	0	0	0	0	1	0	0	0	0	0	0	0	0	0	0	0	0	0	0	0
LINC02777	0	0	0	0	0	0	0	0	0	0	0	0	0	0	0	0	0	0	0	27	0	1	4	15	45	24	68	13	31	14	85	25	27	16	5	31	0	0	0	0	0	0	0	15	3	5	2	9	10
LINC01358	0	1	0	0	0	0	1	0	0	0	0	0	0	0	0	2	0	2	0	6	0	11	1	2	1	8	4	18	4	3	4	11	6	7	13	6	0	0	0	0	0	0	0	3	1	0	5	4	2
PHBP3	0	0	0	0	0	0	0	0	0	0	0	0	0	2	0	0	0	1	0	0	0	0	0	1	2	0	0	0	2	1	1	1	0	0	1	1	3	0	0	12	0	39	0	0	0	0	0	2	0
AL592431.2	0	0	0	0	0	0	0	0	0	0	0	0	0	0	0	0	0	0	0	0	0	0	0	0	0	0	0	0	0	0	0	0	0	0	0	0	0	0	0	0	0	0	0	0	0	0	0	0	0
AL592431.1	0	0	0	0	0	0	0	0	0	0	0	0	0	0	0	0	0	0	0	0	2	0	0	0	0	1	0	0	0	0	0	0	0	0	0	0	0	0	0	0	0	0	0	0	0	0	0	0	0
AC093425.1	0	0	0	0	0	0	1	0	0	0	0	0	0	1	0	0	0	2	0	2	3	3	1	9	7	10	3	13	2	7	11	10	18	5	16	13	0	0	0	0	0	1	0	3	0	0	3	3	3
AC093424.1	0	0	0	0	0	0	2	0	0	0	0	0	0	0	0	0	0	0	0	0	0	0	0	1	1	0	1	0	0	1	0	0	3	0	1	1	0	0	0	0	0	0	0	0	0	0	0	0	0
FGGY	207	424	0	514	466	58	470	448	147	72	243	70	677	239	88	186	363	170	260	195	8	48	60	117	266	194	351	193	333	156	284	497	413	297	118	179	62	170	130	77	224	177	781	102	103	94	63	140	81
MIR4711	0	0	0	0	0	0	0	0	0	0	0	0	0	0	0	0	0	0	0	0	0	0	0	0	0	0	0	0	0	0	0	0	0	0	0	0	0	0	0	0	0	0	0	0	0	0	0	0	0
AL035416.1	0	0	0	0	0	0	0	0	0	0	0	0	0	0	0	0	0	0	0	0	0	0	0	0	0	0	0	0	0	0	0	0	0	0	1	0	0	0	0	0	0	0	0	0	1	0	0	0	0
HOOK1	615	596	247	270	382	256	2981	510	338	356	2606	124	2180	316	385	2494	542	1598	765	652	5	149	259	571	1563	589	2353	965	806	1696	1276	708	1216	2099	307	557	910	553	1064	83	1782	250	2126	927	732	417	685	728	650
CYP2J2	6	95	6	76	0	3	20	3	0	0	52	4	11	37	37	46	114	9	15	12	1	9	3	11	51	16	136	104	6	62	99	8	4	20	16	49	4	4	48	17	5	43	10	26	14	15	11	131	10
RN7SL475P	0	0	0	0	0	0	0	0	0	0	0	0	0	0	0	0	0	0	0	0	1	1	3	0	3	1	9	0	0	1	0	1	0	0	0	6	0	0	0	0	0	0	0	9	0	0	0	0	2
C1orf87	51	2	0	0	1	0	12	3	0	0	0	0	4	0	0	0	54	11	4	8	3	0	32	26	445	103	2747	58	0	8	351	0	0	6	4	228	7	3	0	60	4	140	0	580	1	25	2	34	43
PGBD4P8	0	0	0	0	0	0	0	0	0	0	0	0	0	0	0	0	0	0	0	0	0	0	1	1	0	3	2	5	0	2	0	0	0	2	0	0	0	0	0	1	0	0	0	1	0	0	0	0	0
LINC02778	0	0	0	0	0	0	0	0	0	0	0	0	0	0	0	0	0	0	0	0	0	0	0	0	3	2	10	3	0	0	0	0	0	0	3	1	0	0	0	0	0	0	0	3	0	0	0	1	2
LINC01748	0	0	0	0	0	0	0	0	0	2	0	0	0	3	0	0	0	0	15	0	7	0	1	1	0	1	2	9	1	3	0	23	14	6	24	18	0	0	0	0	0	0	0	0	1	1	47	8	10
AC099792.1	0	0	0	0	0	0	0	0	0	0	0	0	0	2	0	0	0	0	1	0	1	1	0	4	0	4	1	8	0	0	0	26	6	6	10	2	0	0	0	0	0	0	0	0	2	0	2	2	6
NFIA	358	2708	281	644	637	170	2823	459	72	76	1175	149	1026	203	979	3084	2069	909	2619	4073	79	594	567	4838	4866	4142	3599	4415	4670	2988	5371	11458	8511	6167	1924	5299	774	184	725	82	677	652	616	4224	4902	3212	2870	6099	5373
NFIA-AS2	0	0	0	0	0	0	0	0	0	0	0	0	0	0	0	0	0	0	0	4	5	0	1	6	16	18	10	7	18	4	13	32	17	30	15	7	0	0	0	0	0	0	0	3	10	2	2	8	5
NFIA-AS1	0	0	0	0	0	0	0	0	0	0	0	0	0	0	0	0	0	0	0	0	1	0	0	0	2	0	0	0	0	2	1	1	0	0	0	0	0	0	0	0	0	0	0	3	1	0	1	0	0
AC099791.3	0	0	0	0	0	0	0	0	0	0	0	0	0	0	0	0	0	0	0	0	0	0	0	0	0	0	0	0	0	0	0	0	0	0	6	0	0	0	0	0	0	0	0	0	1	0	0	0	0
AC099791.4	0	0	0	0	0	0	0	0	0	0	0	0	0	0	0	0	0	0	0	0	1	0	0	2	0	0	0	0	0	2	0	0	0	2	3	1	0	0	0	0	0	0	0	0	0	0	0	1	0
AC099791.1	0	0	0	0	0	0	0	0	0	0	0	0	0	0	0	0	0	0	0	0	1	0	0	0	0	0	0	0	0	0	0	0	1	0	0	0	0	0	0	0	0	0	0	0	0	0	0	0	0
TM2D1	273	480	254	303	316	94	1001	292	214	166	1330	60	884	296	851	1147	489	633	693	256	5	207	21	182	827	297	1136	254	356	727	1005	369	339	517	126	236	12	221	26	67	31	176	764	342	286	182	160	380	156
AC099791.2	0	0	0	0	0	0	0	0	0	0	0	0	0	0	0	0	0	0	0	0	0	1	1	2	4	5	3	3	2	0	5	4	2	3	1	3	0	0	0	0	0	0	0	0	1	0	0	1	0
PATJ	958	3388	647	998	2954	805	4249	3772	1162	981	2545	605	8111	2311	1279	4641	3554	2467	1148	1307	15	578	420	1462	2254	953	3058	1808	3498	1659	2264	1865	2412	2030	426	2308	1098	848	2013	252	2800	1069	2766	1772	1350	781	834	1694	613
RNU6-414P	0	0	0	0	0	0	0	0	0	0	0	1	0	0	0	0	0	0	0	2	0	2	0	1	0	1	0	2	0	1	0	0	2	0	1	5	0	0	0	0	0	0	0	2	1	2	4	1	7
RNU6-1177P	0	0	0	0	0	0	0	0	0	0	0	0	0	0	0	0	0	0	0	7	0	1	0	7	0	0	3	0	0	3	0	1	1	2	0	1	0	0	0	0	0	0	0	1	0	1	0	3	6
LAMTOR5P1	8	4	0	0	0	0	2	4	0	0	0	1	24	10	0	15	3	6	0	6	0	0	0	2	0	0	1	2	1	0	1	3	0	0	0	0	0	0	0	3	0	13	4	4	2	0	1	6	1
RN7SL180P	0	0	0	0	0	0	0	0	0	0	0	0	0	1	0	1	0	0	0	0	0	0	0	5	0	1	2	1	3	2	0	2	1	0	0	8	0	0	0	0	0	0	0	1	0	2	4	3	2
MIR3116-1	0	0	0	0	0	0	0	0	0	0	0	0	0	0	0	1	0	0	0	0	0	2	0	0	1	0	0	0	0	0	0	1	1	0	0	0	0	0	0	0	0	0	0	0	1	0	0	0	1
MIR3116-2	0	0	0	0	0	0	0	0	0	0	0	0	0	0	0	0	0	0	0	0	0	0	0	0	0	0	0	0	0	0	0	0	0	0	0	0	0	0	0	0	0	0	0	0	0	0	0	0	0
PIGPP2	0	0	0	0	0	0	0	0	0	0	0	0	0	0	0	0	0	0	0	0	1	0	0	0	0	0	0	0	0	0	0	0	0	0	0	0	0	0	0	0	0	0	0	0	0	0	0	0	2
RPS15AP7	0	0	0	0	0	0	0	0	0	0	0	0	0	0	0	0	0	0	0	0	0	0	0	0	0	0	0	0	0	0	0	0	0	0	0	0	0	0	0	0	0	0	0	0	0	0	0	0	0
L1TD1	0	4	0	0	57	0	34	18	67	0	158	2	20	14	445	3	52	18	14	6	5	6	7	3	7	25	12	10	6	0	1	48	28	22	21	3	5	0	21	88	6	182	4	0	0	0	4	8	2
AL162739.2	0	0	0	0	0	0	0	0	0	0	0	0	0	0	0	0	0	0	0	0	0	0	0	0	0	0	0	0	0	0	0	0	0	0	0	0	0	0	0	0	0	0	0	0	0	0	0	0	0
AL162739.1	0	0	0	0	0	0	0	0	0	0	0	0	0	0	0	0	0	0	0	0	0	0	0	0	0	0	0	0	0	0	0	0	0	0	0	0	0	0	0	0	0	0	0	0	0	0	0	0	0
KANK4	9	9	18	7	30	0	180	1	6	15	0	0	11	783	0	396	22	10	469	15	2	0	8	2	4	12	20	30	59	2	10	45	8	41	22	11	234	0	51	17	2	75	2	6	14	4	14	1	10
RNU6-371P	0	0	0	0	0	0	0	0	0	0	0	0	0	0	0	0	0	0	0	0	0	0	0	0	0	0	0	0	0	0	0	0	0	1	0	0	0	0	0	0	0	0	0	0	0	0	0	0	0
USP1	275	612	126	244	452	280	1644	227	12	379	1727	167	838	368	561	2452	566	832	2489	291	18	247	75	208	1263	621	1367	623	504	851	1053	1091	882	971	305	201	95	172	202	85	287	205	421	484	287	247	215	294	194
DOCK7	644	1635	647	850	1585	261	2681	1485	831	227	1511	322	2099	342	989	4125	1564	1949	3551	686	16	155	161	653	1016	649	916	958	506	1024	983	702	607	769	342	538	253	638	431	178	725	411	1413	600	633	370	763	1002	289
AL451044.1	0	0	0	0	0	0	0	0	0	0	0	0	0	0	0	0	0	0	0	0	0	0	0	1	0	0	0	0	0	0	0	0	0	0	1	0	0	0	0	0	0	0	0	0	0	0	0	0	0
ANGPTL3	3662	238	987	2358	279	17	3	102	401	0	61	0	11	0	162	3	143	1	0	0	0	0	0	0	0	0	0	0	0	0	0	1	0	0	3	0	14	280	1	426	0	161	307	0	0	0	0	0	1
AL138847.2	2	0	0	1	0	0	0	0	3	0	0	0	0	0	0	0	0	0	0	0	1	0	1	0	0	0	0	1	0	1	0	0	2	0	0	0	0	0	0	0	0	0	0	0	0	0	0	0	0
AL138847.1	0	1	0	0	1	0	3	5	0	5	0	0	1	2	2	12	3	0	6	4	0	0	1	2	2	2	1	4	0	1	1	2	2	2	1	10	1	0	2	0	4	3	0	4	1	5	4	7	2
AC103923.1	0	0	0	0	0	0	0	0	0	0	0	0	0	0	0	2	0	0	0	0	1	0	1	0	4	1	0	6	1	1	1	1	0	4	1	3	0	0	0	0	0	0	0	1	1	0	3	0	0
ATG4C	117	293	355	81	203	35	677	110	53	77	539	41	268	71	781	678	363	308	533	82	2	80	16	72	350	147	269	176	126	153	233	331	372	170	97	54	17	78	47	107	52	98	157	130	92	48	50	115	52
AC099794.1	0	0	0	0	0	0	0	0	0	0	0	0	0	0	0	0	0	0	0	0	0	0	0	0	2	0	0	0	0	0	0	0	0	1	1	2	0	0	0	0	0	0	0	0	0	0	0	0	0
AC099794.2	0	0	0	0	0	0	0	0	0	0	0	0	0	0	0	0	0	0	0	0	0	0	0	0	0	0	0	0	0	0	0	0	0	0	0	0	0	0	0	0	0	0	0	0	1	0	0	0	0
LINC01739	0	0	0	0	0	0	0	0	0	0	0	0	0	0	0	0	0	0	0	0	0	0	0	0	0	0	0	0	0	0	0	0	0	1	5	0	0	0	0	0	0	0	0	0	0	0	0	0	0
AL162400.3	0	0	0	0	0	0	0	0	0	0	0	0	0	0	0	0	0	0	0	0	0	0	0	0	0	0	0	0	0	0	0	0	0	0	3	0	0	0	0	0	0	0	0	0	0	0	0	0	2
AL162400.1	0	0	0	0	0	0	0	0	0	0	0	0	0	0	0	0	0	0	0	0	0	0	0	0	0	0	0	0	0	0	0	1	0	0	1	0	0	0	0	0	0	0	0	0	0	0	0	0	0
AL162400.2	0	0	0	0	0	0	0	0	0	0	0	0	0	0	0	0	0	0	0	0	0	0	0	0	0	0	0	0	0	0	0	0	0	0	0	0	0	0	0	0	0	0	0	0	0	0	1	0	0
AC096543.1	0	0	0	0	0	0	0	0	0	0	0	0	0	0	0	0	0	0	0	0	0	0	0	0	0	0	0	1	0	0	0	0	0	0	3	1	0	0	0	0	0	0	0	0	0	0	0	0	0
LINC00466	0	0	0	0	0	0	0	0	0	0	0	0	0	0	0	2	0	0	0	0	4	0	0	0	0	0	0	0	0	1	0	2	0	5	21	4	0	0	0	1	0	1	0	0	0	0	0	0	5
RNA5SP49	0	0	0	0	0	0	0	0	0	0	0	0	0	0	0	0	0	0	0	0	0	0	0	0	0	0	0	0	0	0	0	0	0	0	0	0	0	0	0	0	0	0	0	0	0	0	0	0	0
AC096543.2	0	0	0	0	0	0	0	0	0	0	0	0	0	0	0	0	0	0	0	0	0	0	0	0	0	0	0	0	0	0	0	0	0	1	1	0	0	0	0	0	0	0	0	0	0	0	0	1	0
RPSAP65	0	0	0	0	0	0	0	0	0	0	0	0	0	0	0	0	0	0	0	0	0	0	0	0	0	0	0	0	0	0	0	0	0	0	0	0	0	0	0	2	0	0	0	0	0	0	0	0	0
FOXD3-AS1	0	0	0	0	0	0	0	0	0	0	0	0	0	0	0	135	0	0	0	0	0	0	0	1	0	0	0	1	0	1	0	4	1	0	1	3	0	0	0	22	0	7	0	0	0	0	0	0	0
FOXD3	0	14	0	0	0	0	38	0	0	0	0	3	0	5	521	45	11	17	27	2	0	0	1	0	0	0	0	1	0	2	3	4	0	1	0	26	2	0	4	2	0	18	9	0	0	0	0	0	0
MIR6068	0	0	0	0	0	0	0	0	0	0	0	0	0	0	0	0	0	0	0	0	0	0	0	0	0	0	0	0	0	0	0	0	0	0	0	0	0	0	0	0	0	0	0	0	0	0	0	0	0
AL049636.2	0	0	0	0	0	0	0	0	0	0	0	0	0	0	0	0	0	0	0	0	0	0	0	0	0	0	0	0	0	0	0	0	0	0	0	0	0	0	0	0	0	0	0	0	0	0	0	0	0
AL049636.1	0	0	0	0	0	0	0	0	0	0	0	0	0	0	0	0	0	0	0	0	0	2	0	1	0	0	0	1	0	0	1	0	1	0	2	0	2	0	0	4	0	3	0	0	0	0	0	0	0
ALG6	171	340	158	115	230	89	1039	208	36	119	225	128	548	105	336	2017	512	631	965	77	1	128	14	78	197	112	194	124	93	203	174	164	161	180	46	68	40	84	9	88	22	307	317	120	108	58	74	113	42
ITGB3BP	86	69	7	63	50	32	229	61	19	38	205	23	166	32	27	286	63	154	366	84	3	74	17	97	224	126	333	120	121	166	174	152	156	371	77	61	6	36	3	47	47	51	109	158	131	64	73	151	63
BX004807.1	0	0	0	0	0	0	0	0	0	0	0	0	0	0	0	0	0	0	0	0	0	0	0	0	0	0	0	0	0	0	0	0	0	0	0	0	0	0	0	0	0	0	0	0	0	1	0	0	2
EFCAB7	110	128	27	35	191	73	222	130	33	95	376	48	328	40	127	352	155	138	398	131	3	73	44	178	342	146	384	140	167	240	264	228	180	314	75	174	18	122	42	43	120	120	320	209	138	102	106	218	58
RN7SL488P	0	0	0	2	0	0	0	0	1	0	0	0	0	0	0	0	0	0	0	0	0	0	0	0	0	0	0	0	0	0	0	0	0	0	0	0	0	0	0	0	0	0	0	0	0	0	0	1	0
RNU7-123P	0	0	0	0	0	0	0	0	0	0	0	0	0	0	0	0	0	1	0	0	0	1	0	0	0	0	0	0	0	0	0	0	1	0	0	0	0	0	0	0	0	0	0	0	0	0	0	0	0
DLEU2L	1	7	0	10	1	0	10	10	1	0	0	0	14	0	0	5	4	0	18	13	1	19	2	42	27	9	34	30	4	28	14	19	17	50	7	31	0	0	0	0	0	10	4	71	53	34	27	58	41
AL109925.3	0	0	0	0	0	0	0	0	0	0	0	0	0	0	0	0	0	0	0	0	0	0	0	0	0	0	0	1	0	0	0	1	0	0	0	0	0	0	0	0	0	0	0	0	0	0	0	0	0
AL109925.6	0	0	0	0	0	0	0	0	0	0	0	0	0	0	0	0	0	0	0	0	0	0	0	0	0	0	0	0	0	0	0	0	0	0	0	0	0	0	0	0	0	0	0	0	0	0	0	0	0
AL109925.4	0	0	0	0	0	0	0	0	0	0	0	0	0	0	0	0	0	0	0	0	0	0	0	0	0	0	0	0	0	0	0	0	0	0	0	0	0	0	0	0	0	0	0	0	0	0	0	0	0
AL109925.2	0	0	0	0	0	0	0	0	0	0	0	0	0	0	0	0	0	0	0	0	0	0	0	0	0	0	0	0	0	0	0	0	0	0	0	0	0	0	0	0	0	1	0	0	0	1	1	0	0
AL109925.5	0	0	0	0	0	0	0	0	0	0	0	0	0	0	0	0	0	0	0	0	0	1	0	0	0	0	0	2	0	0	0	0	0	0	0	1	0	0	0	0	0	0	0	0	0	0	0	0	0
AL109925.1	0	1	0	0	0	0	0	0	0	0	0	0	1	0	0	1	0	0	0	0	0	0	0	0	0	0	0	0	0	0	0	0	0	0	0	0	0	0	0	0	0	0	0	1	0	0	2	1	0
PGM1	270	1563	915	955	985	247	1739	1013	527	260	912	237	1366	498	113	1843	907	629	747	315	5	49	54	138	579	432	989	628	682	675	783	982	499	413	147	202	177	693	726	189	785	436	2486	160	148	118	105	319	60
RN7SL130P	0	0	0	0	0	0	0	0	0	0	0	0	1	0	0	0	0	0	0	1	1	3	8	5	2	7	5	6	1	17	9	6	1	3	2	8	0	0	0	0	0	0	0	4	1	3	1	5	1
ROR1	314	954	143	199	692	26	524	1015	194	1	117	14	547	24	340	322	876	64	696	156	2	15	2	18	15	120	132	83	11	80	28	120	17	61	133	18	28	110	97	48	168	120	1054	6	11	1	35	9	12
AL161742.1	0	0	1	0	0	0	1	0	0	0	0	0	0	0	0	0	1	0	0	0	1	0	0	0	0	1	1	0	2	2	1	0	0	0	0	0	0	0	0	1	0	2	0	0	1	0	0	0	0
CFL1P3	0	0	0	0	0	0	0	0	0	0	0	0	0	0	0	0	1	0	0	0	0	0	0	0	1	0	0	0	0	0	0	0	0	0	1	0	0	0	0	4	0	7	0	0	0	0	0	0	1
RNU6-809P	0	0	0	0	0	0	0	0	0	0	0	0	0	0	0	0	0	0	0	0	0	0	0	0	0	0	0	0	0	0	0	2	0	0	0	0	0	0	0	0	0	0	0	0	0	0	0	0	0
AL138793.1	0	0	0	0	0	0	0	0	0	0	0	0	0	0	0	0	0	0	0	0	0	0	0	0	0	0	0	0	0	0	0	0	0	0	0	0	0	0	0	0	0	0	0	0	0	0	0	0	0
ROR1-AS1	0	0	0	0	0	0	0	0	0	0	0	0	0	0	0	0	0	0	0	0	2	0	0	0	0	0	1	3	0	6	0	2	0	3	12	1	0	0	0	0	0	2	0	0	0	1	0	0	3
AL445205.1	0	0	0	0	0	0	0	0	0	0	0	0	0	0	0	0	0	0	0	0	1	0	0	0	0	0	0	0	0	0	0	5	0	1	0	0	0	0	0	0	0	0	0	1	0	0	1	0	2
UBE2U	0	0	0	0	0	0	43	0	0	0	0	0	2	0	124	42	7	0	0	0	0	0	0	0	0	0	0	2	0	0	0	5	0	1	6	0	15	0	0	23	0	31	1	0	0	0	7	0	0
RNU7-62P	0	0	0	0	0	0	0	0	0	0	0	0	0	0	0	0	0	0	0	0	0	0	0	0	0	0	0	0	0	0	0	0	0	0	0	0	0	0	0	0	0	0	0	0	0	0	0	0	0
CACHD1	149	693	0	161	214	165	869	812	4	89	151	12	337	604	125	1590	882	380	1054	79	3	50	47	92	213	436	91	231	373	196	99	610	436	233	36	33	111	33	175	65	425	284	826	16	14	6	16	56	34
MIR4794	0	0	0	0	0	0	0	0	0	0	0	0	0	0	0	0	0	0	0	0	0	0	0	0	0	0	0	0	0	0	0	0	0	0	0	0	0	0	0	0	0	0	0	0	0	0	0	1	0
RAVER2	202	588	309	140	275	322	684	293	46	165	532	45	673	121	83	506	369	281	1207	54	4	26	29	84	312	212	205	323	281	148	235	345	366	165	55	188	48	235	118	47	151	113	872	148	12	58	10	28	56
JAK1	1871	6529	770	1876	2990	660	3877	3856	2029	781	2115	440	5063	847	1935	3428	5891	2794	3590	6045	41	1692	613	2883	5177	3795	7462	3248	4059	6994	7028	3771	2267	4311	2418	1980	409	1171	796	235	1408	885	2718	1388	1090	712	775	2656	594
AL606517.2	0	0	0	0	0	0	0	0	0	0	0	0	0	0	0	0	0	0	0	0	0	0	0	0	0	0	0	0	0	0	0	0	0	0	0	0	0	0	0	0	0	0	0	0	0	0	0	0	0
AL606517.1	0	0	0	0	0	0	0	0	0	0	0	0	0	0	0	0	0	0	0	0	0	0	0	0	0	0	0	0	0	0	0	0	0	0	0	0	0	0	0	0	0	0	0	0	0	0	0	0	0
LINC01359	2	4	14	0	1	0	7	3	15	1	2	6	5	4	0	21	1	10	2	38	5	22	19	146	43	27	60	89	31	50	23	111	80	74	15	227	0	0	0	0	0	1	0	139	101	78	28	78	143
SLC2A3P2	106	162	123	58	58	31	102	69	107	57	67	26	147	7	2	181	78	48	57	16	0	3	2	34	11	5	16	24	13	8	8	21	13	18	1	71	2	3	1	7	16	44	8	44	19	19	6	34	22
AL357078.2	0	0	0	0	0	0	1	1	0	0	0	0	2	0	0	4	0	3	1	10	8	6	13	25	4	7	8	20	4	9	2	11	9	12	2	29	0	0	0	0	0	0	0	11	15	9	4	14	20
RNU6-1176P	0	0	0	0	0	0	0	0	0	0	0	0	0	0	0	0	0	0	1	0	0	0	0	11	0	0	1	2	1	1	0	4	0	2	0	15	0	0	0	0	0	0	0	5	5	7	2	7	21
MIR3671	0	0	0	0	0	0	0	0	0	0	0	0	0	0	0	0	0	0	0	2	0	3	0	3	4	2	8	0	0	0	4	2	1	4	0	0	0	0	0	0	0	0	0	17	10	9	2	8	4
MIR101-1	0	2	0	0	0	0	2	0	0	0	0	0	5	0	0	0	0	1	1	0	0	0	0	1	1	0	6	6	1	0	0	1	1	2	0	8	2	0	6	0	3	11	2	3	1	4	2	3	2
AL357078.1	0	0	0	0	0	0	0	0	0	0	0	0	0	0	0	0	0	0	0	0	0	0	0	0	0	0	0	0	0	0	0	0	0	0	0	0	0	0	0	0	0	0	0	0	0	0	0	0	0
MRPS21P1	0	1	0	1	0	0	1	0	6	0	0	0	2	0	0	0	0	0	0	0	0	0	0	0	0	0	0	0	0	0	0	0	0	0	3	0	12	0	0	14	1	13	0	0	0	0	0	0	0
AK4	17	29	23	23	1	0	12	4	0	0	9	6	34	15	5	18	1	5	122	43	2	1	3	25	101	160	29	288	16	344	196	412	89	58	61	69	0	1	5	11	2	23	4	151	41	47	64	71	108
RPS29P7	1	0	0	0	6	0	0	0	0	0	0	0	3	0	0	1	1	0	5	0	0	0	0	0	1	0	0	0	0	4	0	1	1	1	0	2	3	0	0	1	0	1	1	2	1	1	0	1	0
DNAJC6	574	1005	770	653	789	260	1051	746	604	107	1639	46	2443	269	366	418	740	637	786	1616	13	13	89	610	2529	971	4862	568	68	2149	3807	123	84	1791	448	1012	15	452	97	80	285	535	1905	1221	1293	884	508	1653	703
AL139294.1	0	0	0	0	0	0	0	0	0	0	0	0	0	0	0	0	0	0	0	2	0	0	0	2	1	0	1	0	0	0	0	0	0	0	0	0	0	0	0	0	0	0	0	2	1	1	0	3	1
COX6CP13	0	0	0	0	0	0	0	0	0	0	0	0	0	0	0	0	0	0	0	2	0	0	0	0	1	0	1	0	0	1	0	0	0	2	0	1	0	0	0	0	0	0	0	5	1	0	0	1	1
RNU2-15P	0	0	0	0	0	0	0	0	0	0	0	0	0	0	0	0	0	0	0	0	0	0	0	0	0	0	0	2	0	0	1	0	0	2	0	1	0	0	0	0	0	0	0	0	2	1	0	1	2
LEPROT	70	213	36	112	150	80	249	205	72	72	242	12	269	50	167	247	176	128	121	1194	13	140	65	634	1950	1645	2435	1016	1149	1794	2328	1916	1460	1793	524	528	10	66	0	11	11	42	215	583	455	360	386	585	525
LEPR	567	1354	11634	777	284	265	1418	215	293	6	1175	145	5383	34	671	309	1606	277	494	1224	23	42	74	1614	6430	7433	46715	1104	85	15622	14961	1596	545	18128	1095	1916	54	22	14	389	275	1954	261	2133	1623	1149	403	2436	2268
AC119800.1	0	0	0	1	0	0	1	0	0	0	0	2	0	0	0	0	0	0	0	0	0	1	0	1	0	0	2	0	0	2	1	0	0	0	3	1	0	0	0	0	0	0	0	0	0	2	2	0	6
AC097063.1	0	0	0	0	0	0	0	1	0	0	0	0	0	0	0	0	0	0	0	0	0	0	0	0	0	0	0	1	0	0	0	0	0	0	3	1	0	0	0	0	0	0	0	0	0	2	0	0	0
AL513493.1	0	0	0	0	0	0	0	0	0	0	0	0	0	0	0	0	0	0	0	0	1	1	0	0	0	1	1	3	0	0	0	0	0	1	2	0	0	0	0	0	0	0	0	0	1	1	2	1	1
RN7SL854P	0	0	0	0	0	0	0	0	0	0	0	0	0	0	0	0	0	0	0	0	0	1	0	0	1	3	2	1	2	3	1	0	0	0	3	1	0	0	0	0	0	0	0	0	0	0	0	0	0
PDE4B	83	111	138	66	106	168	242	52	53	67	217	76	386	177	107	79	160	193	924	681	2	402	46	179	417	1253	265	703	272	735	888	502	485	451	376	108	31	128	71	92	242	182	715	490	61	215	209	204	84
PDE4B-AS1	0	0	0	0	0	0	0	0	0	0	0	0	0	0	0	0	0	0	0	0	0	0	0	0	0	0	0	1	0	0	0	0	0	0	2	0	0	0	0	0	0	0	0	0	0	0	0	0	0
RNU4-88P	0	0	0	0	0	0	0	0	0	0	0	0	0	0	0	0	0	0	0	0	0	0	0	0	0	0	0	0	0	0	0	0	0	0	0	0	0	0	0	0	0	0	0	0	0	0	0	0	0
SGIP1	76	684	812	88	159	102	696	216	8	119	83	4	125	182	337	48	559	941	157	667	10	10	217	562	814	298	1525	93	79	274	854	303	240	383	385	996	14	241	618	106	428	472	84	824	517	422	588	715	239
MIR3117	0	0	0	0	0	0	0	0	0	0	0	0	0	0	0	0	0	0	0	45	0	0	1	6	3	2	3	0	0	0	1	1	1	0	2	21	0	0	0	0	0	0	0	10	6	10	9	7	3
AL139147.1	0	0	0	0	0	0	0	0	0	0	0	0	0	0	0	0	0	0	0	0	3	2	0	1	0	0	0	2	0	1	2	0	0	0	2	1	0	0	0	0	0	0	0	0	0	0	0	0	1
TCTEX1D1	8	8	0	0	0	2	7	0	0	0	0	0	1	0	0	1	11	3	3	10	3	1	4	7	32	10	19	5	1	15	32	26	1	6	12	52	0	0	0	11	0	35	2	2	6	4	10	2	6
INSL5	0	0	0	0	0	0	0	5	0	0	0	0	0	2	0	0	0	0	1	0	0	0	0	1	1	0	1	0	0	0	0	0	0	1	0	0	0	0	2	3	0	5	0	0	1	0	0	0	0
WDR78	395	256	91	188	99	99	1226	83	163	1	1075	44	439	250	341	1713	255	481	93	126	6	23	19	150	476	270	319	81	361	179	408	673	609	387	95	144	115	113	199	178	91	290	390	202	41	57	36	95	84
AL592161.1	0	0	0	0	0	0	0	0	0	0	0	0	0	0	0	0	0	0	0	0	0	0	0	0	0	0	0	0	0	0	0	1	0	0	0	0	1	0	0	6	0	18	0	0	0	0	0	0	1
MIER1	885	2521	335	884	2063	376	2376	2549	400	402	2097	336	2237	1418	2195	2975	2434	1390	2429	590	29	559	169	492	1623	974	1536	826	533	885	1930	1315	937	1253	701	615	321	529	903	171	2282	532	2382	647	585	317	445	486	364
SLC35D1	240	841	620	424	590	198	844	743	342	221	103	68	534	161	496	1689	603	703	700	377	4	187	42	312	598	450	1186	324	584	500	775	348	379	531	197	790	29	164	46	84	102	258	751	307	422	139	141	331	329
C1orf141	86	14	0	49	0	0	0	79	0	0	165	0	1	0	0	0	18	0	0	0	2	1	0	1	1	1	1	0	0	0	1	0	1	0	6	1	2	9	1	10	0	43	86	1	0	0	0	0	2
AL133320.1	0	0	0	0	0	0	0	0	0	0	0	0	0	0	0	0	0	0	0	0	0	0	0	0	0	0	0	0	0	0	0	0	0	0	0	0	0	0	0	0	0	0	0	0	0	0	0	0	0
AL133320.2	0	0	0	0	0	0	0	1	0	0	0	0	0	0	0	0	0	1	0	0	2	0	1	0	1	1	0	1	0	0	0	1	1	1	9	2	0	0	0	0	0	0	0	0	0	0	1	0	0
IL23R	68	90	77	71	82	85	32	128	98	0	0	3	19	2	163	5	124	18	6	0	2	56	0	1	2	0	0	3	0	0	0	0	1	0	6	2	24	24	8	45	2	230	50	0	2	0	0	0	1
RNU6-586P	0	0	0	0	0	0	0	0	0	0	0	0	0	0	0	0	0	0	0	0	0	0	0	0	0	0	0	0	0	0	0	0	0	0	0	0	0	0	0	0	0	0	0	0	0	0	0	0	0
RNU4ATAC4P	0	0	0	0	0	0	0	0	0	0	0	0	0	0	0	0	0	0	0	0	0	0	0	0	0	0	0	0	0	0	0	0	0	0	0	0	0	0	0	0	0	0	0	0	0	0	0	0	0
AL389925.1	0	3	0	18	12	0	0	8	0	0	0	0	1	1	0	1	0	0	1	0	1	2	0	0	0	1	0	0	1	0	1	0	1	2	1	0	2	1	5	5	0	47	0	0	0	0	0	0	0
IL12RB2	15	52	8	216	31	51	159	34	0	79	331	28	489	0	0	83	179	72	1555	0	3	20	1	2	9	45	6	104	2	135	4	7	5	8	4	4	74	22	21	130	9	460	18	0	1	2	33	3	1
SERBP1	655	2370	607	758	670	480	2156	1304	267	1066	2262	1184	2472	1289	1387	5122	1807	1493	12212	1341	19	554	173	489	2081	1359	2097	1162	1840	1707	1884	2697	2351	2065	994	413	343	495	672	211	620	439	2530	955	710	453	799	954	681
RNU6-387P	0	0	0	0	0	0	0	0	0	0	0	0	0	0	0	0	0	0	0	0	0	0	0	0	0	0	0	0	0	0	0	0	0	0	0	0	0	0	0	0	0	0	0	0	0	0	0	0	0
LINC01702	0	0	0	0	0	0	0	0	0	0	0	0	0	0	0	0	0	0	0	0	1	1	0	0	0	0	0	0	0	0	0	0	0	0	1	0	0	0	0	0	0	0	0	0	0	0	1	0	0
RNU6-1031P	0	0	0	0	0	0	0	0	0	0	0	0	0	0	0	0	0	0	0	0	0	0	0	0	0	0	0	0	0	0	0	0	0	0	0	0	0	0	0	0	0	0	0	0	0	0	0	0	0
AL590559.1	0	0	0	0	0	0	0	0	0	0	0	0	0	0	0	0	0	0	0	0	0	0	0	0	0	0	0	0	0	0	0	0	0	0	0	0	0	0	0	0	0	1	0	0	0	0	0	0	0
RN7SL392P	0	0	0	0	0	0	0	0	0	0	0	0	0	0	0	0	0	0	0	0	0	0	0	0	0	0	0	0	0	0	0	0	0	0	0	0	0	0	0	0	0	0	0	0	0	0	0	0	0
HNRNPCP9	0	0	0	0	4	0	0	0	0	0	0	0	0	0	0	0	0	0	0	0	0	0	0	0	0	0	0	0	0	0	0	0	0	0	1	0	0	0	0	0	0	15	0	0	0	0	0	0	0
GADD45A	81	321	67	233	249	4	96	198	130	128	450	11	226	79	0	256	223	37	855	184	7	79	32	190	329	598	313	233	1073	252	370	210	159	625	150	80	12	73	35	13	40	46	113	41	21	47	56	49	21
GNG12	12	90	38	34	39	46	88	15	13	0	161	114	357	10	79	126	66	20	136	1758	39	29	227	611	4657	2638	4693	1992	2000	2767	4576	3602	2686	1933	1076	606	0	20	2	10	7	21	38	1590	598	715	664	1448	953
RNU7-80P	0	0	0	0	0	0	0	0	0	0	0	0	0	0	0	0	0	0	0	2	0	1	1	1	2	0	3	1	2	3	2	2	0	0	1	7	0	0	0	0	0	0	0	5	1	8	6	8	8
GNG12-AS1	3	0	0	0	20	0	0	0	0	0	0	0	21	0	0	2	0	1	3	29	0	1	1	5	16	13	27	9	5	24	39	18	10	11	7	14	0	0	0	0	0	2	0	14	4	7	9	17	5
AL157407.1	0	0	0	0	0	0	0	0	0	0	0	2	0	0	0	1	0	0	0	0	0	0	1	1	0	0	4	0	0	0	0	0	0	0	0	2	1	0	0	0	0	0	0	1	0	1	3	0	0
DIRAS3	139	123	88	13	55	573	171	241	1	1	7	0	6819	0	32	4	177	5	8	227	2	0	42	98	696	701	900	58	3	169	315	27	19	78	152	193	5	223	27	4	5	26	129	197	112	3	3	635	28
ARL5AP3	0	0	0	0	0	0	1	0	0	0	0	0	0	0	0	0	0	0	0	0	0	0	0	0	3	0	1	0	0	0	0	0	0	0	2	0	0	0	0	0	0	0	0	3	0	0	0	2	0
WLS	258	1376	546	99	368	190	1536	275	93	263	985	418	2596	184	518	1392	965	891	1303	315	4	50	59	128	531	742	473	421	199	843	503	736	544	373	160	195	304	296	342	122	151	252	1477	32	58	48	303	255	51
CTBP2P8	2	13	0	0	6	0	30	11	0	0	0	4	93	14	0	19	24	12	33	5	0	4	4	5	4	7	4	4	3	10	1	17	3	11	3	15	8	6	58	6	9	15	22	0	1	2	10	9	0
MIR1262	10	3	0	0	0	0	3	14	0	0	0	0	5	8	0	5	6	1	1	0	0	0	0	1	0	1	0	1	0	1	0	2	1	0	0	0	0	0	0	1	0	7	1	0	1	0	2	3	0
RPS7P4	5	5	0	0	4	0	8	0	1	0	1	2	2	5	0	4	7	5	5	0	0	0	0	1	2	0	3	0	1	2	0	3	0	1	1	0	0	1	1	21	2	32	3	1	0	1	0	0	0
COX6B1P7	0	0	0	0	0	0	0	0	0	0	0	0	0	0	0	0	0	0	0	0	0	0	0	0	0	0	0	0	0	0	0	0	0	0	0	0	0	0	0	0	0	0	0	0	0	0	0	0	0
ELOCP18	0	0	0	0	0	0	0	0	0	0	0	0	0	0	0	0	0	0	0	0	0	0	0	0	0	0	0	0	0	5	0	0	0	0	1	0	1	0	0	0	0	0	0	0	0	0	0	0	0
AL139413.1	0	0	0	0	0	0	0	0	0	0	0	0	0	0	0	0	0	0	0	0	0	0	0	0	0	0	0	0	0	3	0	0	0	0	0	0	0	0	0	0	0	0	0	0	0	0	0	1	0
RPE65	4	7	0	0	0	0	1	0	0	0	63	0	23	2	0	6	16	7	308	0	1	0	0	1	2	0	6	1	0	4	0	1	0	1	4	12	39	0	6	99	0	316	0	0	0	1	0	0	2
DEPDC1	6	17	0	10	3	58	83	6	0	81	37	179	12	48	6	661	4	74	850	2	0	6	2	5	8	5	1	26	6	41	5	10	6	19	17	3	9	0	8	40	3	68	11	1	9	6	34	6	6
AL138789.1	0	0	0	0	0	0	0	0	0	0	0	0	0	0	0	0	0	0	0	0	0	0	0	0	0	0	0	0	0	0	0	1	0	1	0	0	4	0	0	0	0	20	0	0	0	0	0	0	1
DEPDC1-AS1	0	0	0	0	0	0	0	0	0	0	0	0	0	0	0	0	0	0	0	0	1	0	0	0	0	1	0	0	0	0	0	0	0	0	3	0	0	0	0	0	0	0	0	0	0	0	0	0	0
TXNP2	0	0	0	0	0	0	0	0	0	0	0	0	0	0	0	0	0	0	0	0	1	0	0	0	0	0	0	0	0	0	0	0	0	0	0	0	0	0	0	0	0	0	0	0	0	0	0	0	0
AL035412.1	0	0	0	0	0	0	0	0	0	0	0	0	0	0	0	0	0	0	0	0	0	0	0	0	0	0	0	0	0	1	0	0	0	0	6	0	0	0	0	0	0	0	0	0	0	0	0	0	0
AL033530.1	0	0	0	0	0	0	0	0	0	0	1	0	0	1	0	8	0	0	1	0	7	0	0	0	0	0	0	125	0	0	1	0	0	0	11	1	0	0	0	0	0	1	0	0	0	0	0	0	0
AL691520.1	0	0	0	0	0	0	0	0	0	0	0	0	0	0	0	1	0	0	0	0	0	0	0	0	0	0	0	24	0	0	0	0	0	0	1	0	0	0	0	0	0	0	0	0	0	0	0	0	2
LINC01707	0	0	0	0	0	0	0	0	0	0	0	0	0	0	0	2	0	0	2	4	2	0	0	3	4	3	11	81	1	3	0	3	0	4	13	3	0	0	0	0	0	0	0	11	4	3	0	7	8
LINC02791	0	0	0	0	0	0	0	0	0	0	0	0	0	0	0	0	0	0	0	0	0	0	0	0	0	0	0	1	0	0	0	0	0	1	0	0	0	0	0	0	0	0	0	0	0	0	0	0	1
LINC01758	0	0	0	0	0	0	0	0	0	0	0	0	0	0	0	0	0	0	0	0	0	0	0	0	1	0	2	3	0	0	1	0	0	0	0	1	0	0	0	0	0	0	0	0	0	0	0	0	0
AL359894.1	0	0	0	0	0	0	0	0	0	0	0	0	0	0	0	0	0	0	0	0	2	0	0	0	0	0	0	71	0	154	0	0	0	0	1	0	0	0	0	0	0	0	0	0	0	0	2	0	0
LRRC7	8	149	0	4	52	19	312	192	31	0	31	2	7	6	6	22	201	22	249	4	5	49	3	86	85	42	14	1378	207	239	10	367	415	112	63	57	77	5	30	119	0	287	0	22	5	2	4	29	65
SGO1P1	0	0	0	0	0	0	0	0	0	0	0	0	0	0	0	0	0	0	0	0	0	0	0	0	0	0	0	0	0	0	0	0	0	0	2	0	0	0	0	0	0	0	0	0	0	0	0	0	0
AL117353.1	0	0	0	0	0	0	0	0	0	0	0	0	0	1	0	0	0	0	0	0	1	0	0	1	1	0	0	0	0	0	0	1	0	0	4	0	0	0	0	0	0	0	0	0	0	0	0	0	0
RN7SL538P	0	0	0	0	0	0	0	0	0	1	0	0	0	0	0	0	0	0	0	0	1	1	1	1	1	1	1	3	1	7	1	1	0	0	1	7	0	0	0	0	0	0	0	0	0	0	0	0	0
PIN1P1	0	0	0	0	0	0	0	0	0	0	0	0	0	0	0	0	0	0	0	0	1	1	0	0	3	0	0	5	2	2	0	2	0	0	0	0	0	0	0	0	0	1	0	0	0	0	0	0	0
LRRC7-AS1	0	0	0	0	0	0	0	0	0	0	0	0	0	0	0	0	0	0	0	0	0	0	0	0	0	0	0	0	0	0	0	0	0	0	1	0	0	0	0	1	0	4	0	0	0	0	0	0	0
LRRC40	143	263	21	82	312	216	506	160	96	106	152	33	435	105	85	442	207	362	763	133	2	123	27	131	387	222	391	220	163	336	348	373	242	343	139	117	29	40	18	36	63	107	227	195	155	118	152	192	41
RN7SL242P	0	0	0	0	0	0	0	0	0	0	0	0	0	0	0	0	0	0	0	0	0	1	1	2	5	6	3	2	3	13	4	11	4	5	1	5	0	0	0	0	0	0	0	1	5	2	0	0	0
SRSF11	1927	4430	1117	1858	4377	1048	4501	3714	1375	1587	2679	1193	5908	1884	2649	5197	4519	3849	10234	1199	20	1305	853	1158	2011	1206	3227	1797	930	1822	1880	1723	1559	2530	812	1504	7518	1283	16084	1766	8270	777	3703	1885	1616	871	1346	1765	851
AL353771.1	0	0	0	0	0	0	0	0	0	0	0	0	0	0	0	0	0	0	0	0	0	0	0	0	0	0	0	0	0	0	0	0	0	0	1	0	0	0	0	0	0	0	0	0	0	0	0	0	0
ANKRD13C	490	649	454	207	555	280	1203	324	76	245	1514	107	984	81	1275	1601	778	613	1091	412	15	285	103	226	893	445	846	448	653	754	653	820	676	737	302	287	67	174	85	100	238	170	453	336	266	156	193	277	176
HHLA3	12	71	0	10	27	17	72	19	0	1	0	3	52	7	3	54	18	37	33	15	1	6	1	26	25	14	31	19	30	12	27	38	45	37	8	23	2	42	7	26	9	30	38	10	3	8	1	4	15
HHLA3-AS1	0	0	0	0	0	0	0	0	0	0	0	0	0	0	0	0	0	0	0	0	0	0	0	0	0	0	0	0	0	0	0	0	0	1	2	1	0	0	0	0	0	0	0	0	0	0	0	0	0
CTH	108	166	354	270	83	59	241	34	5	189	289	39	135	21	22	282	185	74	554	14	0	6	0	46	67	40	67	25	153	32	55	71	104	40	7	27	71	89	29	78	21	248	72	15	20	11	3	26	6
AL354872.2	0	0	0	0	0	0	0	0	0	0	0	0	0	0	0	0	0	0	0	0	0	0	0	1	0	0	0	1	0	1	0	2	3	0	0	1	0	0	0	0	0	0	0	0	0	0	0	0	0
AL354872.1	0	0	0	0	1	0	0	0	0	0	0	0	0	0	0	1	0	0	0	0	0	0	0	0	2	0	1	0	4	0	0	1	3	2	0	0	0	0	0	0	0	0	0	0	1	1	0	0	0
CHORDC1P5	0	0	0	0	0	0	4	3	0	0	0	0	0	0	0	3	0	0	0	0	0	0	0	0	0	0	0	0	0	0	0	2	0	0	2	0	2	0	0	20	0	73	0	0	0	0	0	0	0
CASP3P1	2	0	0	0	0	0	0	0	0	0	0	0	0	0	0	0	0	0	0	0	0	0	0	0	0	0	0	0	0	0	0	0	0	0	1	0	1	0	0	8	0	20	0	0	0	0	0	0	0
LINC01788	0	0	0	0	0	0	0	0	0	0	0	0	0	0	0	0	0	0	0	2	0	0	0	1	0	1	1	0	0	0	0	0	0	1	8	1	0	0	0	0	0	0	0	0	0	1	1	2	0
AL513285.1	0	0	0	0	0	0	0	0	0	0	0	0	0	0	0	0	0	0	0	0	0	0	0	0	0	0	0	0	0	0	0	0	0	0	1	0	0	0	0	0	0	0	0	0	0	0	0	0	0
PTGER3	7	176	0	0	7	3	151	72	0	0	22	2	18	1	146	28	90	95	30	52	13	8	21	16	24	50	542	313	41	70	41	293	13	396	130	11	1	2	3	15	0	38	13	9	181	34	33	451	186
AL031429.1	0	0	0	0	0	0	0	0	0	0	0	0	0	0	0	0	0	0	0	0	0	0	0	0	0	0	0	3	0	0	0	0	0	0	0	0	0	0	0	0	0	0	0	0	0	0	0	0	0
AL031429.2	0	0	0	0	0	0	0	0	0	0	0	0	0	0	0	0	0	0	0	0	2	0	0	0	0	2	7	0	0	0	0	2	0	2	2	0	0	0	0	0	0	0	0	0	2	1	0	8	5
ZRANB2-AS1	0	2	0	0	0	0	5	24	0	0	0	0	1	1	0	1	1	0	9	0	0	0	0	0	0	0	1	0	0	0	1	0	0	1	0	0	2	0	4	13	1	15	1	0	0	1	1	2	1
ZRANB2	760	1961	709	670	2531	137	3046	2549	784	590	3035	929	3851	1073	895	3801	2436	2701	5777	756	8	753	232	1024	979	908	1596	1147	418	1003	1266	1251	1189	2055	573	1094	2047	585	2555	166	3280	597	2017	1615	1084	654	597	1420	518
MIR186	23	28	0	5	0	1	45	8	0	6	6	1	39	1	13	72	5	21	10	1	0	5	0	3	6	4	17	14	0	3	11	9	9	13	1	1	1	0	0	0	0	2	5	37	33	27	10	35	11
ZRANB2-AS2	0	1	0	0	0	0	3	6	0	0	0	0	1	1	0	6	0	0	0	51	10	5	7	94	78	41	97	28	44	58	77	57	106	137	60	105	0	0	0	0	0	0	0	97	112	42	38	85	91
AL358453.1	0	0	0	0	0	0	0	0	0	0	0	0	0	0	0	0	0	0	0	0	0	0	0	0	0	0	0	0	0	1	0	0	0	0	0	0	0	0	0	0	0	0	0	1	0	0	0	0	0
NEGR1	317	488	4	310	218	83	429	548	419	13	198	2	534	28	282	27	943	183	437	250	14	7	66	139	1210	522	2355	1884	28	2552	1233	684	277	2195	570	196	14	32	112	25	103	109	520	1039	1608	727	46	3501	519
AL354949.1	0	0	0	0	0	0	0	0	0	0	0	0	0	0	0	0	0	0	0	0	0	0	0	1	0	0	2	0	0	0	0	0	1	1	4	0	0	0	0	0	0	0	0	0	0	1	0	0	0
AL359821.1	0	0	0	0	0	0	0	0	0	0	0	0	0	0	0	0	0	0	0	0	0	0	0	0	0	0	0	0	0	0	0	0	0	0	0	0	0	0	0	0	0	0	0	0	0	0	0	0	0
[truncated: 58,651 more rows]
[truncated: 14 more columns]
